# Supplementary material for: Genome-wide identification and gene expression analysis of the malate dehydrogenase (MDH) gene family in Eucalyptus grandis
Source: Front Plant Sci. 2025 Aug 5;16:1640247. doi: 10.3389/fpls.2025.1640247 (PMC12361222; doi:10.3389/fpls.2025.1640247)
Supplement: Supplementary file 2 [file Table1.xlsx]

## Sheet: Table S1
Table S1. Phylogenetic tree construction details of MDHs from 29 plant species
Gene ID	Gene name	Group	Organism	Protein length	Protein Sequences
Pum0393s0028.1.p		Group Ⅲ	Porphyra umbilicalis	358	MASRLLARRFASSAAAATEKKPINVAVTGAAGAIGYALLMRIASGDMLGPNQPVNLQLIETEPGMKPLSGVTMELADCAFPLLRSVQSTTDLEAGFGDAGLAILVGARPRSKGMERGDLLTANASIFAAQGAALNAAAARDVSVLVVGNPANTNALVASANAPDLSPAQFMAMTRLDQSRAAAAVAAKTGAHVRDVERVVIWGNHSATQYPDLTHATVRGQPALKAIGDDAWVKKTFIPDVQKRGAAIIDARGASSAASAASAAVDHMRDLVVGAGDAWLSMGIPSDGSYGVEEGLWYSVPVTCAGKGVYQRVGGLPKPDDFSASMMDATRKELLSERDGVRHLLPKAAGGKGKKGRK
Pum2527s0001.1.p		Group Ⅲ	Porphyra umbilicalis	341	MASNGGDPPMVVTVTGAAGQIAYSLLPAICAGRMFGPTTRVALRLLEIPPAMTSLGGVVMELTDCAWPLLASVTATSDAAEAFAGANAAVLVGAFPRGPGMERAELLAKNAGIFKAQGAALDAGAAPGCKVVVVGNPANTNAMILSHFAPSIPKKNISALTRLDHNRAVAAVAAAVGAPLGDVGGVCIWGNHSSTQYPDVTRATVAGKPDVNVVEVMGGQQALSETFIPTIQKRGAAIIAARKMSSAMSAAKAICDHMASWVGGSDGATVSMGVAGAGEYGIEAGTFFSYPVTCTGGEWSIVEGLTVDEASRKYIDATSQELQAERSDALSVLSAAAESKL
Pum0523s0015.1.p		Group Ⅲ	Porphyra umbilicalis	420	MLARSAAAVAAAASAATRPSMASTLLRAGPTAGAPGGRSLAAVAKKDLMPPLTVAVTGAAGQIGYALLMRIASGEMLGKDQPVRLQLIETKQGMSPLKGVMMELEDGAFPLLESVKGTSDLEEGFGDANFSLLVGAMPRKQGMERSDLLSANAAIFADQGKALSATAAPGSRVLIVGNPANTNALVAAANAPDMLPEQFMAMTRLDQSRAEGMIAGKAGVDVKDVDRVIIWGNHSATQYPDVSHARIGGRWAKDVIKDDKWLTGDFVSKVQKRGAEVIAARGASSAASAASAAIDNIRDVHLGSKKWQSIGVLSDGSYGIGGGLWYSVPCACPGLHYTRVKGLPVDEYSASMMNATEAELVAERDAVRHLLPSSYDAGVPLQKLVALKEAWDANDKARI…
Pum1467s0001.1.p		Group Ⅲ	Porphyra umbilicalis	353	MATAAPTREMVAGAPDAPAAAAAPDLGSLLEEMCFPGVNRDGPALRGAKVTIVGCGSVGMACANAILSAGMASTMVFADVDQKKVKGEVMDFVHGGAFLHANIKAAEPNYDGSEGSDIVVITAGARQRPGESRLALVSRNAAIFKSILPPIVQRSPDTLLLIVSNPVDILTSIAARMSGLPPGRVFGSGTYLDSSRLRVALASELAVSPQSVHAIILGEHGDSSVAVSSVANVAGARFSDIRMSDAQWAELHGRVIGAAATVIALKGYTNWGVGAAVGALVGYILRDEKRVVPVSVTAKGTYGIEEDVYLSLPSVLGRGGVERVVRVPLSEAEQGKLRASARSLAEVAATVDL
Pum1620s0001.2.p		Group Ⅲ	Porphyra umbilicalis	299	MVLLVQACANAILSAGLTSTMVFADVDQKKVKGEVMDFVHGGAFHHANVKAAEPNYDGSEDSDIIIITAGARQRPGESRLDLVSRNARIFASIIPPLVARSPAALLLVVSNPVDILTAIAARLAGLPRGRVFGSGTYLDSSRLRVDLSTQLGVSPQSIHANILGEHGDSSVAVASVANLAGGRFADAALTPDLWGELHRRVVGAASEVIALKGYTNWGVGAAVGALVGFILRDEKRVVPVSVAAAGAYGIEDDVFLSLPAVLGRGGVERVVRVPLSQTEQEQLRKSAHSLAKVASSVAL
Pum1620s0001.1.p		Group Ⅲ	Porphyra umbilicalis	353	MGSNAPAEVTAAENGAGKPGATNGCAASLMDEMCFPAMMSDGSALRGAKVTIVGCGSVGMACANAILSAGLTSTMVFADVDQKKVKGEVMDFVHGGAFHHANVKAAEPNYDGSEDSDIIIITAGARQRPGESRLDLVSRNARIFASIIPPLVARSPAALLLVVSNPVDILTAIAARLAGLPRGRVFGSGTYLDSSRLRVDLSTQLGVSPQSIHANILGEHGDSSVAVASVANLAGGRFADAALTPDLWGELHRRVVGAASEVIALKGYTNWGVGAAVGALVGFILRDEKRVVPVSVAAAGAYGIEDDVFLSLPAVLGRGGVERVVRVPLSQTEQEQLRKSAHSLAKVASSVAL
Cre12.g483950.t1.2		Group Ⅱ	Chlamydomonas reinhardtiiv	341	MASSTSSAMAKWAAQAARGFAAAAPSSGKGRKVAVLGAAGGIGQPLSMLMKMNSQVSSLSLYDIAGTPGVAADVSHINTKAQVKGFDKDGLAEALRGCDLVIIPAGVPRKPGMTRDDLFKINAGIVRDLVTAVGQHCPGAVLNIISNPVNSTVPIAAEQLKKMGVYDKRKVMGVTTLDVVRAKTFYAEKNGLDVASVDVPVVGGHAGVTILPLFSQATPKATMSAEVLDALTKRTQDGGTEVVQAKAGKGSATLSMAYAAALFADSCLRGLNGAPVVECTYVESTVTDAPYFASKVKLSTEGVDKIHDLGPLSDYEKAGLKAMMPELLASIEKGVQFVKGA
Cre03.g194850.t1.2		Group Ⅰ	Chlamydomonas reinhardtiiv	355	MLLANRVNAGAARRVSGRAAAPIAVRAGRRSLVCEARKVALLGAAGGIGQPLALLLKMNKFVTELALYDIANVVGVAADLSHCNTPVKVTGYTGPEELGACLKGADLIVIPAGVPRKPGMTRDDLFNTNAGIVKALVEAVAKHAPNAVLEIITNPVNSTVPIAVETLKLAGVYDPKKVIGVTSLDIVRANTFVSEAKGLDMKDVDVPVIGGHAGSTILPLLSQTTPPVTFTEAEKKAMTDKIANAGTVVVEAKAGKGSATLSMAYAAARMAESTLLGLNGEPNIYECAFVQSDVVADCPFFASKVLLGPNGVAKVMGLGELDAFEQAAMAAMLPQLKSEIQKGLDFVKSPPAPAS
Cre09.g410700.t1.2		Group Ⅲ	Chlamydomonas reinhardtiiv	415	MALNMKQQQAGLSRKAARSVSSRAPVVVRAVAAPVAPAAEAEAKKAYGVFRLSYDTQNEDASLTRSWKKTVKVAVTGASGNIANHLLFMLASGEVYGKDQPIALQLLGSERSKEALEGVAMELEDSLYPLLREVSIGTDPYEVFGDADWALMIGAKPRGPGMERADLLQQNGEIFQVQGRALNESASRNCKVLVVGNPCNTNALIAMENAPNIPRKNFHALTRLDENRAKCQLALKSGKFYTSVSRMAIWGNHSTTQVPDFVNARIGGLPAPDVIRDMKWFREEFTPKVALRGGALIKKWGRSSAASTAVSVADAIRALVVPTAPGDCFSTGVISDGNPYGVREGLIFSFPCRSKGDGDYEICDNFIVDEWLRAKIRASEDELQKEKECVSHLIGMMGG…
Cre02.g145800.t1.2		Group Ⅲ	Chlamydomonas reinhardtiiv	360	MTKPNVVPLAVAAAFGAGLAICSKYVLKLHKKKALRVLITGAAGQIGYALAPQVAVGSMLGADQPIILHLLDVEPAKNALEGLRMELVDGAYPLLEGVLTFTDVAAACKDVDVAVMVGGYPRKAGEERKDVMAKNVSIYQQQASALEANASKDVKVVVVANPANTNALILAENAPSIPRENITCLTRLDHNRALGQVAERTGSHVGIVKNVIIWGNHSSTQYPDVNHGTVGGKPIRSAVNDDTWLNGDFITTVQQRGAAIIKARGLSSALSAANAVCNHVRDWVRGTPGGSWTSMGVVSDGSYGVQRGLVYSYPVTCAGGKWKVVQGLPIDGPSRERLRVTEAELVEERDLALQCLAEKK
Cre10.g423250.t1.2		Group Ⅰ	Chlamydomonas reinhardtiiv	353	MADPLNRIQKIASHLDPAKPRKFKVALLGAAGGIGQPLSLLLKMSPYVSDLALYDVANTPGVAADVSHMSTAARVRGYLGPDQLGAALTGAALVIIPAGVPRKPGMTRDDLFNINAGIVRGLAQGIAQHCPAAWVAIISNPVNSTVPIAAEVLQKAGVFNPAKLFGVTTLDVVRAEAFIGELTGTDPRDVHVPVVGGHAGVTILPLLSQARPPLPASMSAEARKALMVRIQDAGTEVVQAKAGAGSATLSMAYAAARFADSCLRAMSGEGPVSEYAYIRHPPRLSSGSGSSVAVDLPYFSSPVRLGRLGVEEVLPLGPMDALEADNFAAMKAELLGSIKKGVEFAAKGPAPAK
Dusal.0713s00005.1.p		Group Ⅰ	Dunaliella salinav	354	MLAYKRVAGSAAQTSSKGASSHRVTPGLSRKSRRHSVTCEAKKVALLGAGGGIGQPLSLLLKMNKLVTELSLYDIAGVAGVGADISHCNTPVKVSSFNGPEELEGALQGAELIIIPAGVPRKPGMTRDDLFNVNAGIVKALVEAASKHCPEAVIQLVTNPVNSTVPIAAEVMKKAGTHNPAKIMGVSTLDVVRANTFVAEAKKLDVKDVDVPVVGGHAGATILPLLSQATPPVSFTDAEKKMMTEKIQNAGTVVVEAKAGKGSATLSMAYAAARMAESTLMGLSGEPNIYECSYVQSDVVPDCPFFASKVLLGPNGVAKVLPLGNMDAFEQACFDAMLPELKASIQKGIDFANA
Dusal.1113s00003.1.p		Group Ⅲ	Dunaliella salinav	305	MLGPNQPVILHLLDIEPAKDALMGVQMELMDAALPLLQGVHTFTSVEQASVGVDVAIMVGGVPRKPGEERKDVMAKNSAVVLGALEIIMCTIIPTFGVSQSNRVLLAAANTNAWVLKENSPGIPAENITCLTRLDHNRAIAQVGERAGVHSTAVKNVIIWGNHSSTQFPDVSHGSVAGQPIKARLQGDSWLEEGFISTVQQRGAAILKARGLSSALSAASSVCDHVRDWMLGTPKGSWVSMGVVSDGSYGITPGLVFSYPVRCCGGKWSIVQGLQLDEPSLNRLRTTEQELLEEREMALASAGVR
Dusal.0046s00026.1.p		Group Ⅲ	Dunaliella salinav	434	MQLNLQKNVGLAQKQATAPSPAFNVRGNAMRSKLPVQVASKAASAKKAPIARAVAEAEDKASKQFGVFRLSYDVNNEDKEMMKNWKKTINVAVTGASGTIANHLLFMLASGEVYGKDQPIALQLLGSERSYEALEGVAMELEDSLYPLLREVSIGIDPYEIFAGADWALMVGAQPRGPGMERSDLIQKNGQIFQVQGRALNEVADRNCKVIVVGNPCCTNALIAMENAPNLPRKNFHALTRLDENRAKSQLALKAGKFYTSVSRVAVWGNHSTTQVPDFLNAKIGGLPAMNVIRDNQWFKEHFTPKVAMRGGALIKKWGRSSAASTAVSVADSIRSLITPTPPGDCFSSGVISDGNLYGIQEGLNFSFPCRSKGDGDYEICNDFIIDDWLRMKIKAAED…
Dusal.0830s00004.1.p		Group Ⅱ	Dunaliella salinav	355	MSFPAMRSAILAAKAIAPSAVGSMGAAPMATFATSAGSPRRKVAVLGAGGGIGQPLSLLLKLNSQVSQLALYDIAGTPGVAADVGHCNTKAQCKGYEQDKLAEAVRGCDLVIVPAGVPRKPGMTRDDLFKVNAGIVKGLVEAVGKHAPGAILNIISNPVNSTVPITAECLKAMGVYDKRKVMGVTTLDVVRAKTFYAEMKGLDVANVDVPVIGGHAGATILPLFSQATPKVPLSQEELEGLTKRTQDGGTEVVQAKAGKGSATLSMAYAAALFADSVLRGLNGTPTMEYTYVDSNVTEAPYFASKVKLSTEGVEKVFGLEGMTDYEKEGLKTMMPELMKSINAGIDFAKEASKAP
Dusal.0263s00006.1.p		Group Ⅰ	Dunaliella salinav	347	MNQAAKRLAHIADHILAPMSAPSSSRAAKVAVLGASGGIGQPLSMLLKTSPRVGELSLYDVANTPGVAADLGHINTGSSIKGYVGPDQLPEALQGCDLVVIPAGIPRKPGMTRDDLFNINASIVAGLCQAVATHCPQAWVAIISNPVNSTVPIAAEVMKRAGAYDPKKLFGVTTLDVVRAEKFISEINKVDPKDVSVPVIGGHAGITIVPLLSQSQPPLKLSEDELAKLTSRIQNAGTEVVEAKQGAGSATLSMAYAAARFADACLRAQAGEDVVEYAFVQSSVLPNVPFLASKLRLGSQGTVQELGLGPLSSAEQRNIDAMTPELLGSIKKGIEFVEKQGVEAANK
57848|PACid:27341517		Group Ⅲ	Micromonas pusilla CCMP1545	439	MAAIATNATALVFAAAAKTSTTSRRAARVAASPALANARVFAAAPRAAFAKSSLRVSVTTRAAAEEGEPYGVFKLNYDISNDVAAKSAGWKTPIVVAVSGAAGQISNHLLFKIASGEVYGADQPIILNLLGSERSKEALEGVAMELEDSLYPLLRQVNIGIDPLKIFKDAEWALLIGAKPRGPGMERSDLLEMNGQIFVEQGKALNEVANKTCKVCVVGNPCNTNALIAMENAPNLDRKNFHALTRLDENRAKCQLALKAGVFYDTVSNVTIWGNHSTTQVPDFVNAKIDGKKAVEVIGDDAWLEEEFTPTIQTRGGALIKKWGRSSAASTAVSIADAIKSLVTPTPEGDWFSTAVSTDGNPYGIAEGIVFSMPCRSKGDGSYEIVEGLEINDWLREKI…
121775|PACid:27339485		Group Ⅱ	Micromonas pusilla CCMP1546	319	MTQTRGYKVAVLGAAGGIGQPCGLLMKMNPLVTELSLYDIAGTPGVAADVSHINTAAQVKGYAGDAELGAALKDADLVIIPAGVPRKPGMTREDLFKINAGIVAGLTEACATHCPNAMINMISNPVNSTVPIAAEVLKKRGAYDPKKLFGVTTLDVVRAKTFYAEKNGLETAKVDVPVVGGHAGITILPLLSQATPKAEMDAATIEALTKRTQDGGTEVVAAKAGKGSATLSMAYAGAVFADSCLRAKNGEAGVVECTYVESNVTDARFFASKVTLGKEGVETIHGLGELTPYEKAGLDGMMAELNDSINKGVEFAKAL
126573|PACid:27342565		Group Ⅰ	Micromonas pusilla CCMP1547	362	MAAAAMPVAAPVLSARASFRGSSKSSVRRSTAKAAATTTRRRVATATTSEYKVAVLGAAGGIGQSLSLLLKMNPMIAQLNLYDIQGTPGVAADLSHTNTQTKVTGYAGADSLADALKGCDLVIIPAGVPRKPGMTRDDLFEINAGIVKTLCEAVAANCPGALVNIISNPVNSTVPIAAEVFKKAGTYDPKKVFGVTTLDVVRSNTFVAEAKGLDVNDVDIPVVGGHAGITILPLLSQSYPATKFDADELEAMTVRIQNAGTEVVEAKAGAGSATLSMAYAAARMAEACLRGLSGEADVYECSYVASSVTELPFFATKVRLGPGGAEEVLPVGDLTEYEKGWLEKLIPELKGSIDKGIAFANK
127031|PACid:27348375		Group Ⅲ	Micromonas pusilla CCMP1548	333	MSPTPVHVLITGAAGQIGYALAPQVCRGAMLGADVPIVLHLLDIPPAEASLKGVAMELTDAAYPLLKGIVATVDVDEACKGVDIAVMVGGFPRGPGMERKEVMSKNVAIYKGQASALETHANAGCKVVVVANPANTNALILSNYAPKIPKENVTCLTRLDHNRALGQVSEKTGAPVSEVKNVIIWGNHSSTQYPDVNHGEVSGMPIRSAIGDDAYLDGEFVKTVQQRGAAIIAARKLSSALSAASSVCDHVRDWVNGTAPGTWTSMGVVSPGGDDAYGIEEGLMYSFPVTCANGRWSIVPGLKIDDRSRGLMDATAAELKEEKAMAEELIAAM
154413|PACid:27346753		Group Ⅰ	Micromonas pusilla CCMP1549	362	MTRHLTRAPVAASPSFSSSGGFAVAILGAAGGIGQPLSLLMKRHPMVTSLRLFDVAPLAKGVAADVSHVDSAARVDGFVGDTQLGAALHGADVVLIPAGVPRKPGMTRDDLFNVNAGIVRDLTAAVATHAPAAILLVISNPVNSTVPIAAEVLKTRGVYDPKKLMGVTHLDVMRARTFVADAVGGEEDGERRRASERPSYDVPVVGGHAGVTILPLLSQTKPFPRGGFSEKEIASLTDRIQNGGTEVVEAKAGAGSATLSMAAAAAEFADLALRGLAGERGAWGCAYVDGGGGSEIKARGLEFFASKVRLGRRGVEQIAGLGRMTPGERVGLEKACEELRGSIAKGKAFVAAGGGDGGGAKK
Vocar.0031s0114.1.p		Group Ⅱ	Volvox carteri	340	MASQSSASLLKWAQAASRGFAAAAASGPGRKVAVLGAAGGIGQPLSMLMKMNAQVSQLSLYDVIGTPGVAADVSHINTKAQAKGFDKDGLAEALRGCDLVIIPAGVPRKPGMTRDDLFKINAGIVRDLVEAVGKHCPGALLNIISNPVNSTVPIAAEQLKKMGVYDKRKVMGVTTLDVVRAKTFYAEKNGLDVASVDVPVVGGHAGVTILPLFSQATPKVNMPHDVLDALTKRTQDGGTEVVQAKAGKGSATLSMAYAAALFADSCLRGLNGTPAVECTYVESSITDAPYFASKVKLSTEGVDKVFELGALSDYEKEGLKAMMPELLASIEKGVEFIKSG
Vocar.0035s0097.1.p		Group Ⅰ	Volvox carteri	353	MLLAQRKLVASQRAQSRAAAPMVARSSRRSLRCEARKVALLGAGGGIGQPLALLLKMNKFVTELALYDIVGVAGVAADLSHCNTPVKVTAFTGPEELAGCLSGADLVVIPAGVPRKPGMTRDDLFNTNAGIVQALVQAAGKNCPQAVLEIITNPVNSTVPIAAETLKAMGVYDPKKVIGVTSLDVVRANTFVAEARGLDMKDVDVPVIGGHAGATILPLLSQTTPAVTFTEAEKKAMTEKIQNAGTVVVEAKAGKGSATLSMAYAAARMAESTLLGLNGEPNIYECAFVQSEVVADVPYFASKVLLGPHGVAKVMGLGELDAFETAALQSMLPQLKAEIQKGVDFAKNAKVAA
Vocar.0008s0141.1.p		Group Ⅲ	Volvox carteri	415	MAFNMKQHVNTGVSRKVAGAGRFPAVAVRAVAAQAPPAAVAETKQAYGVFRLSYDTQNEDPSLTRSWKKTIKVAVTGASGNISNHLLFMLASGEVYGKDQPIALQLLGSERSKEALEGVAMELEDSLYPLLREVSIGTDPYEVFGDADWALMIGAKPRGPGMERADLLQQNGEIFQVQGRALNESASRNCKVIVVGNPCNTNALIAMENAPNIPRKNFHALTRLDENRAKCQLALKSGKFYTSISRVAIWGNHSTTQVPDYINARIGGIPATDVIRDMKWFREEFTPKVALRGGALIKKWGRSSAASTAVSVADAIRSLVTPTPPGDCFSTGVISDGNQYGVREGLIFSFPCRSKGDGDYEICDDFIVDEWLRNKIRATEDELQKEKECVSHLIGMMGG…
Vocar.0009s0119.2.p		Group Ⅰ	Volvox carteri	330	MGSEQGHPTFKVAVLGAAGGIGQPLSMLLKMSPYISELSLYDVANTPGVAADVSHMSTAARVKGYLGPDQLPAALAGCHLVIIPAGVPRKPGMTRDDLFNINAGIVRTLAEAVAAHCPTAWVAIISNPVNSTVPIAAEVLQRAGVLNPARLFGVTTLDVVRAEAFIAEIVGADPRDVSVPVVGGHAGITILPLLSQARPALPASMTAEQRKALMVRIQDAGTEVVQAKAGAGSATLSMAYAAARFADSCLRAMSGEGPVNEYAYVRSSAVPGLPYFSSPLRLGRGGVEEIFPLGAVDAMEQENFEAMKAELLGSIKKGEEFAARGPAAAK
Vocar.0009s0119.1.p		Group Ⅰ	Volvox carteri	342	MAALNRIQKIASHLDPPKLFKFKVAVLGAAGGIGQPLSMLLKMSPYISELSLYDVANTPGVAADVSHMSTAARVKGYLGPDQLPAALAGCHLVIIPAGVPRKPGMTRDDLFNINAGIVRTLAEAVAAHCPTAWVAIISNPVNSTVPIAAEVLQRAGVLNPARLFGVTTLDVVRAEAFIAEIVGADPRDVSVPVVGGHAGITILPLLSQARPALPASMTAEQRKALMVRIQDAGTEVVQAKAGAGSATLSMAYAAARFADSCLRAMSGEGPVNEYAYVRSSAVPGLPYFSSPLRLGRGGVEEIFPLGAVDAMEQENFEAMKAELLGSIKKGEEFAARGPAAAK
Vocar.0054s0004.1.p		Group Ⅲ	Volvox carteri	632	MAKAQILSLAGAALLGAGLVLGSKYLASLKKRKAVRVLITGAAGQIGYALAPQVATGAMFGTDQPIVLHLLDVEPAKNALEGLRMELIDGAYPLLEGVFAFTDVAAACKDVDVAVMVGGYPRKAGEERKDVMAKNVSIYKSQASALAENASKDVKVVVVANPANTNALILAENAPSIPRENITCLTRLDHNRALGQVSERTKTHVTAVKNVIIWGNHSSTQYPDVNHGIVAGKPIRAVVGDDAWLNGEFISTVQQRGAAIIKARGLSSALSAANAVCNHVRDWVCGTPYGSWVSMGVVSDGSYGVQPGLVYSYPVTCSGGKWHVVQGLPIDDASKERMRTTEAELVEERDLALQCLAEKRVQRHRLGIVGYRGALAERRERVRDDGRRHGRLEGHNKIL…
Mapoly0015s0129.1.p		Group Ⅰ	Marchantia polymorpha	353	MEAGNARLARIAAHMRPVRTEESSIRREYTRAKGASAGFKVALLGACGGIGQPLALLLKLNPLVSTLHLYDVVNTPGVTADISHTDTTAVVRGFLGQAQLNAALEGADLVIIPAGVPRKPGMTRDDLFNINAGIVKTLIEGVAKSCPKAIVAIISNPVNSTVPIAAEVLKKAGVYDPKKLFGVTTLDVVRANTFVAEVIGVDPKEVNVPVYGGHAGITILPILSQVSPPFSFSKDEVEYLTNRIQNGGTEVVEAKAGAGSATLSMAYAAAKFAEAALRGMRGESDVVECAFVASEVTELPFFATKVRMGRGGIEEIFPLGPLNEYERQGLVKLKAELKDSIEKGINFVQKSTK
Mapoly0031s0108.1.p		Group Ⅲ	Marchantia polymorpha	678	MWERVAAGAVEGRGARTEERDRGDGGGYGGGERAGRLLMATTAATIKSMNNKQQQQQVHWRQQSNNKRSRAVEGDVASTFRGWCSASSREISQSERDRLCVNLAVVGTSLSIGCSSNRSSSRNSLRPQSKESDRAASVRRVNSTRRTDVAAGSPEFSASLPPSRPHSRPSEISTKSQLSSELNTSRSQTSLSSFSCSTPTTLVRPWSVRGSGFKMPTAALSKVAGTVAAFADKPVTTPFRDSVVGQKFNVHSAFYGQSLRVQSAVSGRSDSRLSSRRSSRSGITFCAVTSPTQPSVDQPSSQPPASESTKTECFGVFCVTYDLKEDERPKTWKKTVRIAVSGAAGAISNHLLFKLASGEVFGQDQPIALNLLGSVRSRNALEGVAMELEDSLFPLLREV…
Mapoly0134s0005.1.p		Group Ⅱ	Marchantia polymorpha	348	MASARGSIVRSLRLVGQHVQKQQSREMSSSSGPQRKVAVLGAAGGIGQPLGLLMKLNPLVTHLSLYDIAGTPGVAADISHCNTPAEVSGYAGDADLGKALEGADIVIIPAGVPRKPGMTRDDLFKINAGIVKSLCAAISQHCPEALVAMISNPVNSTVPIAAEVFKKAGTYDPRKLFGVTTLDVVRARTFYAAKKGLNVRDVDVPVVGGHAGITILPLFSQATPKKSLEGEELDALTKRTQDGGTEVVQAKAGKGSATLSMAYAGALFAEACLKGLNGQKGVIECTYVQSSIIPELPFFSSKVRLGPNGVEEIMGLGQITEYESKALEAMKSELASSIQKGVDFVHQS
Mapoly0206s0010.1.p		Group Ⅲ	Marchantia polymorpha	330	MAKDPVRVLVTGAAGQIGYALVPMIARGIMLGADQPVILHMLDIPPAAEALNGVKMELIDAAFPLLKGIVATTDVAEACKDVNIAVMVGGFPRKEGMERKDVMSKNVSIYKAQASALEANAAKDVKVLVVANPANTNALILKEFAPSIPEKNISCLTRLDHNRALGQIAERLDIPVSSVKNVIIWGNHSSSQYPDVYHAVIDGDKPVREAVADDAWLDGEFIKTVQQRGAAIIKARKLSSALSAASSACDHIRDWVLGTPEGTWVSMGVYSDGSYNVPAGLIYSFPVTCSKGVWSIVQDLPINEFSRKKLDATAEELVEEKQLAYTCINE
Mapoly0068s0019.1.p		Group Ⅰ	Marchantia polymorpha	417	MAAQAAISLAGSVAAAPSFSTSCVSRSHGSLSAGSKVVPRRGLRTFSGLKAERCGGVSGAGAFRGGESFETLAASIDAAKPAKNVEETVRPGQARASSYKVAVLGAAGGIGQPLSLLIKMSPLVSTLNLYDIANVKGVMADLSHCNTPAQVAGFTGPTELAACLKDVDLVIIPAGVPRKPGMTRDDLFNINANIVKTLIEAVADNAPNAIINIISNPVNSTVPIAAEVLKAKGVYDPKKLFGVTTLDVVRANTFVAQKKNLRLIDVDVPVIGGHAGITILPLLSKTRPSAEFTPEEIEELTVRIQNAGTEVVEAKAGAGSATLSMAYAAARFAESCMRALDGDPDVFECTFVQSELTDLPFFASRVKLGKKGVEAFITDDLEGLTEYEQKGVDALMAEL…
Mapoly0049s0082.1.p		Group Ⅲ	Marchantia polymorpha	382	MGDRGGAMEEDEEQHQLRAAHTRWTRGHKGSRLAPTGASSASAEQGLTPDLLFSRLEGLEDQELPARPKPTKVTVVGVGNVGMACAQTILTQNLVDEIALVDVQAEKLRGEMLDLQHAAAFLPRVKIVADTDYSVTAHSDICIITAGARQREGEDRMSLVERNFALFKNIIPELVKYSPHTMLLVITNPVDILSWVSWKLSGLPPNRVIGSGTNLDTSRFRTLLGNHFNVSVHNVHATIVGEHGDSSVPLWSGVTVGGVPLAAFAKEHGIATDPEVFTKAHKYVVDGAYEVIKLKGYTSWAIGYSAAALVSSVLRNQRRVHPVSVLAQGFHGIDMEVFLSLPSMLGRSGVIAVANSVLLEHEAAMLRKSAQAIWSIQSKLQF
Mapoly0068s0019.2.p		Group Ⅰ	Marchantia polymorpha	417	MAAQAAISLAGSVAAAPSFSTSCVSRSHGSLSAGSKVVPRRGLRTFSGLKAERCGGVSGAGAFRGGESFETLAASIDAAKPAKNVEETVRPGQARASSYKVAVLGAAGGIGQPLSLLIKMSPLVSTLNLYDIANVKGVMADLSHCNTPAQVAGFTGPTELAACLKDVDLVIIPAGVPRKPGMTRDDLFNINANIVKTLIEAVADNAPNAIINIISNPVNSTVPIAAEVLKAKGVYDPKKLFGVTTLDVVRANTFVAQKKNLRLIDVDVPVIGGHAGITILPLLSKTRPSAEFTPEEIEELTVRIQNAGTEVVEAKAGAGSATLSMAYAAARFAESCMRALDGDPDVFECTFVQSELTDLPFFASRVKLGKKGVEAFITDDLEGLTEYEQKGVDALMAEL…
Pp3c1_7380V3.1.p		Group Ⅰ	Physcomitrium patens	361	MEEANARAQVRMARIASHMRAPEGNSMVGLEREPTRARGAAPGFKVAVLGAAGGIGQPLSLLMKMHPLVSTLHLYDVFNTPGVVADLSHTNTSAVVRGFLGNDQLGPALTGMDLVIIPAGVPRKPGMTRDDLFNINAGIVRTLIEGCAKHCPRAFINIISNPVNSTVPIAAEVLKLAGVYDPKRLFGVTTLDVVRANTFVAEVIGVDPKTVDVPVLGGHAGITILPILSQVTPQFTFTDKEVAYLTNRIQNGGTEVVEAKAGTGSATLSMAYAAAEFAQSCLRALQGESGIIECAYVASEVTELPFFATKVRIGREGIEEIFPVGPLNHHEREGIEKLKPELRQSIEKGVNFVHNPPPKKS
Pp3c1_7380V3.2.p		Group Ⅰ	Physcomitrium patens	361	MEEANARAQVRMARIASHMRAPEGNSMVGLEREPTRARGAAPGFKVAVLGAAGGIGQPLSLLMKMHPLVSTLHLYDVFNTPGVVADLSHTNTSAVVRGFLGNDQLGPALTGMDLVIIPAGVPRKPGMTRDDLFNINAGIVRTLIEGCAKHCPRAFINIISNPVNSTVPIAAEVLKLAGVYDPKRLFGVTTLDVVRANTFVAEVIGVDPKTVDVPVLGGHAGITILPILSQVTPQFTFTDKEVAYLTNRIQNGGTEVVEAKAGTGSATLSMAYAAAEFAQSCLRALQGESGIIECAYVASEVTELPFFATKVRIGREGIEEIFPVGPLNHHEREGIEKLKPELRQSIEKGVNFVHNPPPKKS
Pp3c14_16940V3.1.p		Group Ⅲ	Physcomitrium patens	459	MAAVAGNLGAVAGASLNSNVLVKLDGGSVSSSAFLGRKLATGGSIKANVKHQGVVGKRRGVVAYVAPSTTEKSVNEPKKAAGGIAEGQKGGQCFGVFCVTYDLKEGERPKTWRKTVRIAVSGAAGMIANHLLFKLASGEVFGQDQPIALNLLGSERSRDALEGVAMELEDSLFPLLREVNIGIEPEEVFADADWALLIGAKPRGPGMERADLLDLNGQIFANQGKALNKVASPDVKVLVVGNPCNTNALIALKNAPRLNPRNFHALTRLDENRAKCQLALKAGVFYDNVSNMTIWGNHSTTQVPDFLNAKIHGARVVDVIQDEKWLKEEFTPRVQKRGGALIQKWGRSSAASTAVSIADAIKSLITPTPEGDWFSSGVYTNGNPYGIAEDIIYSMPCRS…
Pp3c14_16940V3.2.p		Group Ⅲ	Physcomitrium patens	459	MAAVAGNLGAVAGASLNSNVLVKLDGGSVSSSAFLGRKLATGGSIKANVKHQGVVGKRRGVVAYVAPSTTEKSVNEPKKAAGGIAEGQKGGQCFGVFCVTYDLKEGERPKTWRKTVRIAVSGAAGMIANHLLFKLASGEVFGQDQPIALNLLGSERSRDALEGVAMELEDSLFPLLREVNIGIEPEEVFADADWALLIGAKPRGPGMERADLLDLNGQIFANQGKALNKVASPDVKVLVVGNPCNTNALIALKNAPRLNPRNFHALTRLDENRAKCQLALKAGVFYDNVSNMTIWGNHSTTQVPDFLNAKIHGARVVDVIQDEKWLKEEFTPRVQKRGGALIQKWGRSSAASTAVSIADAIKSLITPTPEGDWFSSGVYTNGNPYGIAEDIIYSMPCRS…
Pp3c11_3740V3.4.p		Group Ⅰ	Physcomitrium patens	250	MDLVIIPAGVPRKPGMTRDDLFNINAGIVRTLIEGVAKHCPRAIINIISNPVNSTVPIAAEVLKKAGVYDPKRLFGVTTLDVVRANTFVADVIGVDPKMVDVPVLGGHAGITILPILSQATPKFTFTDKEVAYLTNRIQNGGTEVVEAKKGAGSATLSMAYAAAKFAESCLRALQGESGIVECAYVDCEVTELPFFATKVRIGRSGIEEIYPLGPLNAHEREGLEKLKPELHESIQKGVKFVQNPPAPKS
Pp3c11_3740V3.3.p		Group Ⅰ	Physcomitrium patens	335	MTGVEREATRARGAAPGFKVAILGAAGGIGQPLSLLMKMSPLVSTLHLYDVFNTPGVVADLSHTNTSAVVRGFLGNDQLGPALDGMDLVIIPAGVPRKPGMTRDDLFNINAGIVRTLIEGVAKHCPRAIINIISNPVNSTVPIAAEVLKKAGVYDPKRLFGVTTLDVVRANTFVADVIGVDPKMVDVPVLGGHAGITILPILSQATPKFTFTDKEVAYLTNRIQNGGTEVVEAKKGAGSATLSMAYAAAKFAESCLRALQGESGIVECAYVDCEVTELPFFATKVRIGRSGIEEIYPLGPLNAHEREGLEKLKPELHESIQKGVKFVQNPPAPKS
Pp3c11_3740V3.1.p		Group Ⅰ	Physcomitrium patens	361	MEMANVRAQVRLARIASHMEAPERNIMTGVEREATRARGAAPGFKVAILGAAGGIGQPLSLLMKMSPLVSTLHLYDVFNTPGVVADLSHTNTSAVVRGFLGNDQLGPALDGMDLVIIPAGVPRKPGMTRDDLFNINAGIVRTLIEGVAKHCPRAIINIISNPVNSTVPIAAEVLKKAGVYDPKRLFGVTTLDVVRANTFVADVIGVDPKMVDVPVLGGHAGITILPILSQATPKFTFTDKEVAYLTNRIQNGGTEVVEAKKGAGSATLSMAYAAAKFAESCLRALQGESGIVECAYVDCEVTELPFFATKVRIGRSGIEEIYPLGPLNAHEREGLEKLKPELHESIQKGVKFVQNPPAPKS
Pp3c11_3740V3.2.p		Group Ⅰ	Physcomitrium patens	361	MEMANVRAQVRLARIASHMEAPERNIMTGVEREATRARGAAPGFKVAILGAAGGIGQPLSLLMKMSPLVSTLHLYDVFNTPGVVADLSHTNTSAVVRGFLGNDQLGPALDGMDLVIIPAGVPRKPGMTRDDLFNINAGIVRTLIEGVAKHCPRAIINIISNPVNSTVPIAAEVLKKAGVYDPKRLFGVTTLDVVRANTFVADVIGVDPKMVDVPVLGGHAGITILPILSQATPKFTFTDKEVAYLTNRIQNGGTEVVEAKKGAGSATLSMAYAAAKFAESCLRALQGESGIVECAYVDCEVTELPFFATKVRIGRSGIEEIYPLGPLNAHEREGLEKLKPELHESIQKGVKFVQNPPAPKS
Pp3c12_8120V3.1.p		Group Ⅱ	Physcomitrium patens	345	MAARSVAVGLLKRALSSQQQVRGMSSATPKRKVAVLGAAGGIGQPLGLLMKLNPLVTDLSLYDIAGTPGVACDISHINTGANVEGFAGEEDLAKALKGCDLVIIPAGVPRKPGMTRDDLFNINAGIVRSLASAIAEHCPGALVNMISNPVNSTVPIAAEVFKQKGTYDPKRLFGVTTLDVVRARTFLAHRKGLNVRDVDVPVVGGHAGITILPLFSQATPKVDLSDEELDALTKRTQDGGTEVVQAKAGKGSATLSMAYAGALFAESCVKGMNGAQDIVECSYVASSVVPGLPYFSSKVRLGPNGVEEVLGLGKLSDYEQKGLDSLKSELMSSIEKGVNFVNVKT
Pp3c4_20940V3.1.p		Group Ⅱ	Physcomitrium patens	347	MAARFAAAGLLKRALSSAPQQQVRCMSSQTPKRKVAVLGAAGGIGQPLGLLMKLNPLVTDLSLYDIAGTPGVASDLSHINTGANVEGFAGEQELAKALKGCDLVIIPAGVPRKPGMTRDDLFNINAGIVKSLASAIAEHCPGALVNMISNPVNSTVPIAAEIFKQKGTYDPKRLFGVTTLDVVRARTFLAHKKGLNVKDVDVPVVGGHAGITILPLFSQATPKVDLSDEELEALTKRTQDGGTEVVQAKAGKGSATLSMAYAGALFAESCLKGLNGAPDIVECSYVASTVVPGLPYFSSKVRLGPNGIEEILGLGSLSDYEQKGLEGLKSELMSSIEKGVNFVNVKA
Pp3c4_20940V3.2.p		Group Ⅱ	Physcomitrium patens	347	MAARFAAAGLLKRALSSAPQQQVRCMSSQTPKRKVAVLGAAGGIGQPLGLLMKLNPLVTDLSLYDIAGTPGVASDLSHINTGANVEGFAGEQELAKALKGCDLVIIPAGVPRKPGMTRDDLFNINAGIVKSLASAIAEHCPGALVNMISNPVNSTVPIAAEIFKQKGTYDPKRLFGVTTLDVVRARTFLAHKKGLNVKDVDVPVVGGHAGITILPLFSQATPKVDLSDEELEALTKRTQDGGTEVVQAKAGKGSATLSMAYAGALFAESCLKGLNGAPDIVECSYVASTVVPGLPYFSSKVRLGPNGIEEILGLGSLSDYEQKGLEGLKSELMSSIEKGVNFVNVKA
Pp3c17_20310V3.1.p		Group Ⅲ	Physcomitrium patens	459	MAAVAGNLGALTAAVTNGDVLVKLDKRNVLSSAFFSRKLVAAGSTKVTVRQQREGEMRRGVVAYVAPSTTEKTVSEPERTANGVAEKQTGGQCFGVFCVTYDLKEGERPKTWKKTVRIAVSGAAGMIANHLLFKLASGEVFGQDQPIALNLLGSVRSRDALEGVAMELEDSLFPLLREVNIGIEAEEVFADADWALLIGAKPRGPGMERADLLDINGQIFAEQGKALNKVASPDVKVLVVGNPCNTNALIALKNAPRLNPRNFHALTRLDENRAKCQLALKAGVFYDNVSNVTIWGNHSTTQVPDFLNAKIHGARVMDVIQDEKWLKEEFTPRVQKRGGALIQKWGRSSAASTAVSIGDAIKSLITPTPEGDWFSSGVYTSGNPYGIAEDIIYSMPCRS…
Pp3c17_20310V3.2.p		Group Ⅲ	Physcomitrium patens	459	MAAVAGNLGALTAAVTNGDVLVKLDKRNVLSSAFFSRKLVAAGSTKVTVRQQREGEMRRGVVAYVAPSTTEKTVSEPERTANGVAEKQTGGQCFGVFCVTYDLKEGERPKTWKKTVRIAVSGAAGMIANHLLFKLASGEVFGQDQPIALNLLGSVRSRDALEGVAMELEDSLFPLLREVNIGIEAEEVFADADWALLIGAKPRGPGMERADLLDINGQIFAEQGKALNKVASPDVKVLVVGNPCNTNALIALKNAPRLNPRNFHALTRLDENRAKCQLALKAGVFYDNVSNVTIWGNHSTTQVPDFLNAKIHGARVMDVIQDEKWLKEEFTPRVQKRGGALIQKWGRSSAASTAVSIGDAIKSLITPTPEGDWFSSGVYTSGNPYGIAEDIIYSMPCRS…
Pp3c8_19590V3.2.p		Group Ⅱ	Physcomitrium patens	389	MLSHCNTTIPSHQPASLPNKGCIVGMWGAESFCRMGTARVAAFIRCGCHLESRMRACSVGGDAAGLQGQQLWARGKRTVAVLGGAGGIGQPLSLLLKLNPLVSDLRLYDVAGTPGVACDLSHVNTQATVEGYAGDAELEKTLKGCDLIIIPAGVPRKPGMTRDDLFNINAGIVKSLMIGIAKHAPKALVNIISNPVNSTVPIAAEVLKKAGVFDPRRLFGVTTLDVMRARTFYAARMKTPVKDVDLPVIGGHAGITILPLLSQVKPKKNMTEKDIDALTKRIQDGGTEVVQAKAGKGSATLSMAFAGALFAEACIKGLEGEKNVVECAYVKSDVVKGIPFFSSKVQLGPNGIEKILGLGELSAYEQKALEAMKKELLNSITKGIDFVKK
Pp3c17_6520V3.1.p		Group Ⅰ	Physcomitrium patens	418	MASMATTAFHAATAANRACLSSIAASSASPASCRSVSFSSFRLAAASGLPGLSLSSASVRGGFVRLQSDGVSKVSVQGMPVQVRADSSASAGPKSGSSTFKVAVLGAAGGIGQPLSLLIKMSPFVSELRLYDIANVKGVAADLSHCNTPAQVSAYTGAGELAGALKDVDLVIIPAGVPRKPGMTRDDLFNINAGIVRSLVEAVADHCPNALINIISNPVNSTVPIAAEVLKAKGVYDPKKVFGVTTLDVVRANTFVAQKKNLRLIDVNVPVIGGHAGITILPLLSKTKPTVEFMPEEVEELTVRIQNAGTEVVEAKAGAGSATLSMAYAAARFAESCMRGLDGDSDVYECAYVQSEVTDLPFFATTVKLGKKGVEEIVGEDLSGLTEYEKKAVEALKAE…
Pp3c17_6520V3.2.p		Group Ⅰ	Physcomitrium patens	418	MASMATTAFHAATAANRACLSSIAASSASPASCRSVSFSSFRLAAASGLPGLSLSSASVRGGFVRLQSDGVSKVSVQGMPVQVRADSSASAGPKSGSSTFKVAVLGAAGGIGQPLSLLIKMSPFVSELRLYDIANVKGVAADLSHCNTPAQVSAYTGAGELAGALKDVDLVIIPAGVPRKPGMTRDDLFNINAGIVRSLVEAVADHCPNALINIISNPVNSTVPIAAEVLKAKGVYDPKKVFGVTTLDVVRANTFVAQKKNLRLIDVNVPVIGGHAGITILPLLSKTKPTVEFMPEEVEELTVRIQNAGTEVVEAKAGAGSATLSMAYAAARFAESCMRGLDGDSDVYECAYVQSEVTDLPFFATTVKLGKKGVEEIVGEDLSGLTEYEKKAVEALKAE…
Pp3c2_2120V3.1.p		Group Ⅲ	Physcomitrium patens	466	MDVKTMAQAAGKLVSPAADSVNSNRFPKVESKAVGNVLSSSFRGRRLVTSIPVKFVETPQHLQSRRGVIAYSAPATAKKPVNEPAKTANSVAESQKDGQCFGVFCVTYDLNESERPKTWKKMVRVAVSGAAGMISNHLLFKLASGEVFGQDQPIALNLLGSERSRGALEGVAMELEDSLFPLLREVNIGIEAEEVFVDADWALLIGAKPRGPGMERADLLDINGQIFAEQGKALNKVASPDVKVLVVGNPCNTNALIALKNAPRLNPRNFHALTRLDENRAKCQLALKAGVFYDHVSNVTIWGNHSTTQVPDFLNARILGASAVDVIQDENWLKEEFTPRVQTRGGALIQKWGRSSAASTAVSIADAIKSLVTPTPEGDWFSSGVYTNGNPYGIAEDLI…
Pp3c2_2120V3.2.p		Group Ⅲ	Physcomitrium patens	466	MDVKTMAQAAGKLVSPAADSVNSNRFPKVESKAVGNVLSSSFRGRRLVTSIPVKFVETPQHLQSRRGVIAYSAPATAKKPVNEPAKTANSVAESQKDGQCFGVFCVTYDLNESERPKTWKKMVRVAVSGAAGMISNHLLFKLASGEVFGQDQPIALNLLGSERSRGALEGVAMELEDSLFPLLREVNIGIEAEEVFVDADWALLIGAKPRGPGMERADLLDINGQIFAEQGKALNKVASPDVKVLVVGNPCNTNALIALKNAPRLNPRNFHALTRLDENRAKCQLALKAGVFYDHVSNVTIWGNHSTTQVPDFLNARILGASAVDVIQDENWLKEEFTPRVQTRGGALIQKWGRSSAASTAVSIADAIKSLVTPTPEGDWFSSGVYTNGNPYGIAEDLI…
Pp3c14_9020V3.1.p		Group Ⅰ	Physcomitrium patens	414	MASTATAFNAATAANGVRLNSIAASCASSASCRSVSFSSLRPAAASRLSSLNSSLRGGFIVVQGDVAWRQDVRGMPVQVRADASGAAAPKSGSSTFKVAVLGAAGGIGQPLSLLIKMSPLVSDLRLYDIANVKGVAADLSHCNTPAQVSAYTGPAELAAALKDVNLVIIPAGVPRKPGMTRDDLFNINAGIVRSLVEAVAENCPNALINIISNPVNSTVPIAAEVLKAKGVYDPKKVFGVTTLDVVRANTFVAQKKNLRLIDVNVPVIGGHAGITILPLLSKTKPTVEFTPAEVEELTVRIQNAGTEVVDAKAGAGSATLSMAYAAARFAESCMRAMDGDSDVYECAYVQSEVTDLPFFATTLKLGKKGVEEIISEDLNGLTEYEKKAVEALKTELKGS…
Pp3c14_9020V3.2.p		Group Ⅰ	Physcomitrium patens	414	MASTATAFNAATAANGVRLNSIAASCASSASCRSVSFSSLRPAAASRLSSLNSSLRGGFIVVQGDVAWRQDVRGMPVQVRADASGAAAPKSGSSTFKVAVLGAAGGIGQPLSLLIKMSPLVSDLRLYDIANVKGVAADLSHCNTPAQVSAYTGPAELAAALKDVNLVIIPAGVPRKPGMTRDDLFNINAGIVRSLVEAVAENCPNALINIISNPVNSTVPIAAEVLKAKGVYDPKKVFGVTTLDVVRANTFVAQKKNLRLIDVNVPVIGGHAGITILPLLSKTKPTVEFTPAEVEELTVRIQNAGTEVVDAKAGAGSATLSMAYAAARFAESCMRAMDGDSDVYECAYVQSEVTDLPFFATTLKLGKKGVEEIISEDLNGLTEYEKKAVEALKTELKGS…
Pp3c21_10840V3.3.p		Group Ⅲ	Physcomitrium patens	275	MSQKFQAASCVVATTDVAEACKDVNIAVMVGGFPRKEGMERKDVMSKNVSIYKAQASALEQHAAKDVKVLVVANPANTNALILKEFAPSIPEKNITCLTRLDHNRALGQVAERLNVPVSTVKNVIIWGNHSSSQYPDVNHAVIDSPDGEKAVRDAVSDDAWLDGEFIKVVQQRGAAIIKARKLSSALSAASSACDHIRDWVLGTPKGSWVSMGVYSDGSYNVPPGIIYSYPVTCANGDWTIVQGLSIDEKSRAKLDATADELVEEKALAYTCISE
Pp3c21_10840V3.1.p		Group Ⅲ	Physcomitrium patens	333	MAKDPVRVLVTGAAGQIGYALVPMIARGIMLGPDQPVILHMLDIPPATESLNGVKMELTDAAFPLLKGVVATTDVAEACKDVNIAVMVGGFPRKEGMERKDVMSKNVSIYKAQASALEQHAAKDVKVLVVANPANTNALILKEFAPSIPEKNITCLTRLDHNRALGQVAERLNVPVSTVKNVIIWGNHSSSQYPDVNHAVIDSPDGEKAVRDAVSDDAWLDGEFIKVVQQRGAAIIKARKLSSALSAASSACDHIRDWVLGTPKGSWVSMGVYSDGSYNVPPGIIYSYPVTCANGDWTIVQGLSIDEKSRAKLDATADELVEEKALAYTCISE
Pp3c21_10840V3.2.p		Group Ⅲ	Physcomitrium patens	333	MAKDPVRVLVTGAAGQIGYALVPMIARGIMLGPDQPVILHMLDIPPATESLNGVKMELTDAAFPLLKGVVATTDVAEACKDVNIAVMVGGFPRKEGMERKDVMSKNVSIYKAQASALEQHAAKDVKVLVVANPANTNALILKEFAPSIPEKNITCLTRLDHNRALGQVAERLNVPVSTVKNVIIWGNHSSSQYPDVNHAVIDSPDGEKAVRDAVSDDAWLDGEFIKVVQQRGAAIIKARKLSSALSAASSACDHIRDWVLGTPKGSWVSMGVYSDGSYNVPPGIIYSYPVTCANGDWTIVQGLSIDEKSRAKLDATADELVEEKALAYTCISE
Pp3c18_10120V3.1.p		Group Ⅲ	Physcomitrium patens	367	MTTTGQTTKPKIVFDWRAEAATHAPGSAFEMAEKVVNKLFRPIPGSSVSEEGKRTHKVTVVGVGNVGMACAQTILTQELCDELALVDVVEEKLKGEMLDLQHAAAFLPRAKILADTDYRVTADSDICIVTAGARQQEGQSRLALVEKNVSLFKKIIPELMKHSPNTILLVISNPVDALTYVAYKLSGLPPNRVIGAGTNLDSSRFRWLLADHLDVNAQNVHGYIVGEHGDSSVPLWSSVSVGGVPIISYLKQKHIDYSPDTLAELHRMVVDGAYEVIKLKGYTSWAIGYSVASLVKSVLRNQRRIHPVSVCSQGFHGIEDEVCLSLPAVIGRAGIVSVLDSPLTDEEKEQLQTSAKTLALIQNKLDM
Pp3c21_11360V3.1.p		Group Ⅲ	Physcomitrium patens	367	MATIGQNTKSKFVFNWREEEAKHEPGSAFELTDKVANQLFKSIPGSSISNVPRRTSKVTVVGVGNVGMACAQTILTQDLCDELALVDVVEEKLKGEMLDLQHAAAFLPRSKILADTDYKVTADSDICIVTAGARQREGESRLALVEKNVSLFKKIIPQLVKHSPDTILLIISNPVDALTYVAYKLSGLPPNRVIGSGTNLDSSRFRWLLADHLDVNAQNVHGYIVGEHGDSSVPLWSSVSVGGIPIISYLKQRHIDYNPDTLSELHRIVVDGAYEVIKLKGYTSWAIGYSVASLVKSVLRDQRRIHPVSVCSQGFHGIKDQAYLSLPAEIGRSGIIGVMDSPLTDEEREQLQKSAKTMAEIQKKLDI
Pp3c21_11360V3.2.p		Group Ⅲ	Physcomitrium patens	367	MATIGQNTKSKFVFNWREEEAKHEPGSAFELTDKVANQLFKSIPGSSISNVPRRTSKVTVVGVGNVGMACAQTILTQDLCDELALVDVVEEKLKGEMLDLQHAAAFLPRSKILADTDYKVTADSDICIVTAGARQREGESRLALVEKNVSLFKKIIPQLVKHSPDTILLIISNPVDALTYVAYKLSGLPPNRVIGSGTNLDSSRFRWLLADHLDVNAQNVHGYIVGEHGDSSVPLWSSVSVGGIPIISYLKQRHIDYNPDTLSELHRIVVDGAYEVIKLKGYTSWAIGYSVASLVKSVLRDQRRIHPVSVCSQGFHGIKDQAYLSLPAEIGRSGIIGVMDSPLTDEEREQLQKSAKTMAEIQKKLDI
Pp3c22_12920V3.1.p		Group Ⅲ	Physcomitrium patens	416	MSFSTNSAVAQHYTIQRRHGTPTTTLLLSVASSAALPTSQKGFRRGAMFTREEKEVKPKLVFNWRAQAGEHAPGSAFEMAEKVGKQLFQTIPGSGPPPAVKRTYKVTVVGVGNVGMACAQTILTQDLCDELALVDVVEEKLKGEMLDLQHAAAFLPGSKIMADTDYKVTEGSDLCIVTAGARQREGESRLALVEKNVTLFKNIIPQLVKYSPDTTLLIISNPVDALTYVAYKLSGLPPNRVIGSGTNLDSSRFRWLLADHLHVNAQNVHGYIVGEHGDSSVPLWSSVSVGGVPFLAFLKHKQIEYTIDTLTELHKMVVDGAYEVIKLKGYTSWAIGYSVASLVKSLLRDQRRIHPVSVCAQGFHGIEDEVYLSLPAEIGRTGIIGVLDNPLTDDERAQL…
Pp3c22_12920V3.2.p		Group Ⅲ	Physcomitrium patens	416	MSFSTNSAVAQHYTIQRRHGTPTTTLLLSVASSAALPTSQKGFRRGAMFTREEKEVKPKLVFNWRAQAGEHAPGSAFEMAEKVGKQLFQTIPGSGPPPAVKRTYKVTVVGVGNVGMACAQTILTQDLCDELALVDVVEEKLKGEMLDLQHAAAFLPGSKIMADTDYKVTEGSDLCIVTAGARQREGESRLALVEKNVTLFKNIIPQLVKYSPDTTLLIISNPVDALTYVAYKLSGLPPNRVIGSGTNLDSSRFRWLLADHLHVNAQNVHGYIVGEHGDSSVPLWSSVSVGGVPFLAFLKHKQIEYTIDTLTELHKMVVDGAYEVIKLKGYTSWAIGYSVASLVKSLLRDQRRIHPVSVCAQGFHGIEDEVYLSLPAEIGRTGIIGVLDNPLTDDERAQL…
Pp3c8_19590V3.1.p		Group Ⅱ	Physcomitrium patens	361	MLSHCNTTIPSHQPASLPNKGCIVGMWGAESFCRMGTARVAAFIRCGCHLESRMRACSVGGDAAGLQGQQLWARGKRTVAVLGGAGGIGQPLSLLLKLNPLVSDLRLYDVAGTPGVACDLSHVNTQATVEGYAGDAELEKTLKGCDLIIIPAGVPRKPGMTRDDLFNINAGIVKSLMIGIAKHAPKALVNIISNPVNSTVPIAAEVLKKAGVFDPRRLFGVTTLDVMRARTFYAARMKTPVKDVDLPVIGGHAGITILPLLSQVKPKKNMTEKDIDALTKRIQDGGTEVVQAKAGKGSATLSMAFAGALFAEACIKGLEGEKNVVECAYVKSDVVKGIPFFSSKVSYIFKQPFLFFTTLFL
Pp3c8_19590V3.4.p		Group Ⅱ	Physcomitrium patens	361	MLSHCNTTIPSHQPASLPNKGCIVGMWGAESFCRMGTARVAAFIRCGCHLESRMRACSVGGDAAGLQGQQLWARGKRTVAVLGGAGGIGQPLSLLLKLNPLVSDLRLYDVAGTPGVACDLSHVNTQATVEGYAGDAELEKTLKGCDLIIIPAGVPRKPGMTRDDLFNINAGIVKSLMIGIAKHAPKALVNIISNPVNSTVPIAAEVLKKAGVFDPRRLFGVTTLDVMRARTFYAARMKTPVKDVDLPVIGGHAGITILPLLSQVKPKKNMTEKDIDALTKRIQDGGTEVVQAKAGKGSATLSMAFAGALFAEACIKGLEGEKNVVECAYVKSDVVKGIPFFSSKVSYIFKQPFLFFTTLFL
Pp3c8_19590V3.3.p		Group Ⅱ	Physcomitrium patens	304	MLSHCNTTIPSHQPASLPNKGCIVGMWGAESFCRMGTARVAAFIRCGCHLESRMRACSVGGDAAGLQGQQLWARGKRTVAVLGGAGGIGQPLSLLLKLNPLVSDLRLYDVAGTPGVACDLSHVNTQATVEGYAGDAELEKTLKGCDLIIIPAGVPRKPGMTRDDLFNINAGIVKSLMIGIAKHAPKALVNIISNPVNSTVPIAAEVLKKAGVFDPRRLFGVTTLDVMRARTFYAARMKTPVKDVDLPVIGGHAGITILPLLSQVKPKKNMTEKDIDALTKRIQDGGTEVVQAKAGKGSATLSMA
Sphfalx01G055200.1.p		Group Ⅰ	Sphagnum fallax	364	MEQRSGTKAQMRLARISSHMLSSSCPPQGLKMGGLEREPTRAQGAAPGFKVAVLGAAGGIGQPLSLLLKMNPLVSTLHLYDVFNTPGVTADLSHTNTSAVVRGYLGKDQLGPALDGMDLVIIPAGVPRKPGMTRDDLFNINAGIVRTLIEGVAKHCPHAIVNIISNPVNSTVPIAAEVLKIAGVYDPKRLFGVTTLDVVRANTFVAEVIGVDPKDVNVPVIGGHAGVTILPILSQVSPKFAFNEKEVEYLTNRIQNGGTEVVEAKAGTGSATLSMAYAAAKFGEACLRALQGETGIIECAYVASEVTEFPFFATKVRLGRNGVEEIFPLGPLNSYEREGLEKMKAELHGSIEKGVNFVHKPKSS
Sphfalx05G079200.1.p		Group Ⅰ	Sphagnum fallax	365	MEQQQQQYSGLKAQTRLARISSHMLSSPQGLQMGGVERELTRARGAAPGFKVAVLGAAGGIGQPLSLLLKMNPLVSTLHLYDVFNTPGVTADLSHTNTSAVVRGYLGKDQLGPALDGMDLVIIPAGVPRKPGMTRDDLFNINAGIVRTLIEGVAKHCPQAIINIISNPVNSTVPIAAEVLKIAGVYDPRRLFGVTTLDVMRANTFVAEVIGVDPKEVNVPVVGGHAGITILPLLSQTSPLFSFNSKEVEYLTNRIQNGGTEVVEAKAGTGSATLSMAYAAAKFGEACLRALQGETGIVECAYVASEVTEFPFFASKVRLGRTGAEEIFPLGPLNSFEREALEKMKAELQGSIEKGFNFVHKPKSS
Sphfalx11G081600.1.p		Group Ⅲ	Sphagnum fallax	483	MAAALLQAPGVQISGCRVQPQQQSTGSSSSSSSTTLVAGQSSRSVVLSSAYFGRSKFVARRLWIDKASKKEFCFLRTKKQQQGVQCSVADSSTIQDSVATTQLIPGSEKTPEGVECYGVFCVTYDLKEIDEQKPKTWKKMLRVVVSGAAGMISNHLLFKLASGEVFGHDQPIALNLLGSERSRDALEGVAMELEDSLFPLLREVNIGIEATEVFRDADWALLIGAKPRGPGMERADLLDLNGQIFAEQGKALNAVASPDVKVLVVGNPCNTNALIALKNAPRIPSKNFHALTRLDENRAKCQLALKAGLFYDNVSNVTIWGNHSTTQVPDFLNAKINGKPATEVITDRKWLEEEFTPRVQTRGGALIKKWGRSSAASTAVSIADAIKSLVNPTPKGDWF…
Sphfalx04G088500.1.p		Group Ⅲ	Sphagnum fallax	480	MATGLQASGVQVSGCGVQSQSTTTTTTTTTTVGQASCSVARSAFFGRGKWVARRLRIVAHKEELVLVQKKNQQAGVQCSVAPSAIQEPVAAAGAQPVVAAPSSGMTPEERECFGVFCVTYDLKETDDDQRSKTWKKMVRVLVSGAAGMIANHLLFKLASGEVFGHDQPIALNLLGSEKSRDALEGVGMELEDCLFPLLREVNIGTDPIEVFRDVDWALLIGAKPRDAGMERADLLDLNGKIFAEQGKALNAVASPDVKVLVVGNPCNTNALIALKNAPRIPSKNFHALTRLDENRAKCQLALKAGVFYDNVSNVTIWGNHSTTQVPDFLNARINGKPATDVITDQKWLEEEFTPRVQTRGGALIQKWGRSSAASTAVSIADAIKSLVTPTPEGDWFSSG…
Sphfalx02G097700.1.p		Group Ⅱ	Sphagnum fallax	349	MAARRSVAVLLKRSVVSAANSPAQTRCISSSSSPRRKVAVLGAAGGIGQPLGLLMKLNPLVTDLSLYDIAGTPGVAADISHVDTTATVEGFAGEADLAKALKGCDLVIIPAGVPRKPGMTRDDLFKINAGIVKGLCTAIAEHCPGALVNMISNPVNSTVPIAAEVFKLHGTYDSRKLFGVTTLDVVRARTFYSVLKGLPVREVNVPVVGGHAGITILPLFSQASPKVQLTDEEIEALTKRTQDGGTEVVQAKAGKGSATLSMAYAGALFAEACLKGLNGVENIQCSYVASDITNLPFFSSKVRLGRNGVEEVLELGSLSDYEQKGLEALKEELQSSIQKGLDFVKPQHT
Sphfalx16G080600.1.p		Group Ⅱ	Sphagnum fallax	347	MARALSFTAGQLFLRQQAMHVGSSRGGSPGKGGPKRKVAVLGAAGGIGQPLGLLMKLSPLVTDLALFDIAGTPGVACDLSHVNTQAKVEGFAGDGELGKALTGCDLVIIPAGVPRKPGMTRDDLFKINAGIVKNLCKAIAEHCPKALVNIISNPVNSTVPIAAEVFKQAGTYDKAKLFGVTTLDVVRARTFYAAKKGIPVEGVDLPVVGGHAGITILPLFSQATPKMDMTEKEIDTLTKRTQDGGTEVVQAKAGKGSATLSMAYAGALFAEACLKGLNGQKNVIECSYVESTITDIPFFSSKVRLGPKGIAEVLGLGKLTAYEKKALDAMAKELKASIRNGIEFVKK
Sphfalx01G072800.1.p		Group Ⅱ	Sphagnum fallax	347	MAARSVATLLKRSVSAATSTQTTRCMSSSSTPKRKVAVLGAAGGIGQPLGLLMKLNPLVTDLSLYDIAGTPGVAADISHVDTGARVEGFAGEQDLGEALKGCDVVIIPAGVPRKPGMTRDDLFKINAGIVKGLCTAIAEHCPGALVNMISNPVNSTVPIAAEVFKQHGTYDPRKLFGVTTLDVVRARTFYSSLKGLSVREVNVPVVGGHAGITILPLFSQASPKVQLTDDEIEALTKRTQDGGTEVVQAKAGKGSATLSMAYAGALFAEACIKGLNGEENIQCTYVASNITDLPFFSSKVRLGKNGVEEVLGLGTLSDYEQKGLDALKEELRSSIQKGIDFVNPQHA
Sphfalx09G029900.1.p		Group Ⅰ	Sphagnum fallax	416	MAATSLALHKVSCFSGEHVEVGTAHVRSSRTAQVFLSAKCSRSVSLNSFCGLKSVRASASSYSLFGGHSLSLFQRHAVVVRDLETVVAPGQARAAAYKVAVLGAAGGIGQPLSLLIKMSPLVSDLNLYDIANVKGVVADLSHCNTPAKVAAFTGADELAAALKGVDVVVIPAGVPRKPGMTRDDLFNINAGIVRSLVEAVADNCPNAMITIISNPVNSTVPIAAEVLKAKGVYDPSKLFGVTTLDVVRANTFVAEKKNLRLIDVDVPVIGGHAGITILPLLSKTRPTVEFTPEEVEELTVRIQNAGTEVVEAKAGAGSATLSMAYAAARFAESCMRALDGDPDVYECAYVQSEVTELPFFATRVKLGKKGLEAVVSGDLAGLTEYEQKALEALKPELKA…
Sphfalx08G141700.1.p		Group Ⅲ	Sphagnum fallax	333	MAKDPVRVLVTGAAGQIGYALVPMIARGIMLGPDQPVILHMLDIPPAVESLNGVKMELQDAAFPLLKGIVATTDVAEACKDVNIAVMVGGFPRKEGMERKDVMSKNVSIYKAQASALEQYAAKDVKVLVVANPANTNALILKEFAPSIPEKNITCLTRLDHNRALGQIAERLEVPVSSVKNVIIWGNHSSSQYPDVNHAVVEGPDGEKSVRSTVSDDAWLNGEFIKVVQQRGAAIIKARKLSSALSAASSACDHIRDWVLGTPEGTFVSMGVYSDGSYNTPPGIIFSYPVICKNGDWSIVQGLSIDEFSREKLVATAAELVEEKEVAYSCISE
Sphfalx12G028300.1.p		Group Ⅰ	Sphagnum fallax	416	MATSRLALHNVSCFSAEHVNAGTPRIQSSRAAGVFLSVKSSQSVPLNSFCGLKSVGACTSTNLHLEGDSLALLQSPPGGVRDLERMFTPGQARAAAYKVAVLGAAGGIGQPLSLLIKMSPLVSDLHLYDIANVKGVVADLSHCNTPAKVAAFTGAGELAAALKDVDVVVIPAGVPRKPGMTRDDLFNINAGIVRTLIEAVADNCPNAMINIISNPVNSTVPIAAEVLKAKGVYDPSKLFGVTTLDVVRANTFVAEKKNLRLIDVDVPVIGGHAGITILPLLSKTRPTVDFTPEEIEELTVRIQNAGTEVVEAKAGAGSATLSMAYAAARFAESCMRALDGDPDVYECAYVQSEVTELPFFASRVKLGKKGLEAIVSGDLTGLTDYEQNALEALKSELKG…
Sphfalx05G100000.1.p		Group Ⅲ	Sphagnum fallax	333	MAKHPVRVLVTGAAGQIGYALVPMIARGIMLGPDQPVILHLLDIPPAVESLNGVKMELIDAAFPLLQGIVATTDVAEACKDVNIAVMVGGFPRKEGMERKDVMSKNVSIYKGQASALEQYAAKDVKVLVVANPANTNALILKEFAPSIPEKNITCLTRLDHNRALGQVAERLGVAVSSVKNVIIWGNHSSSQYPDVNHAVVEGPDGVKSVRSAVADDAWLNGEFIKVVQQRGAAIIKARKLSSALSAASSACDHIRDWVLGTPEGTFVSMGVYSDGSYHTPPGIIFSFPVTCKNGNWNIVQGLFIDQFSREKLDATGAELVEEKEVAYSCISE
Sphfalx07G092100.1.p		Group Ⅲ	Sphagnum fallax	365	MATAETYPNIVFDWRSETAEHVPESARKVAFDIKQALFQPLPGACPSRTATKISKITVVGVGNVGMACAQTILTQNLADELALVDVDPEKLRGEMLDLQHAAAFLPRAKIVANTDYKVSEGSDICIVSAGARQRNGESRLALVQRNVAILKSIIPQLVKYSPAAILLIISNPVDALTYVAWKLSGFPSNRVFGSGTNLDSSRFRGLLADRLDVSAHNVHSYVIGEHGDSSVPVWSTVNIGGVPIIEFLKNMGIPYSQSTLDELHKMVIGGAYEVIKLKGYTSWAIGYSVASLVNSLLRDQRCIHPVSVCAKGFYGIKDEVYLSLPAQLGYTGVMGVLNLPLTDEEREKLQQSAKTLAEVQDQLDI
Sphfalx10G030100.1.p		Group Ⅲ	Sphagnum fallax	467	MEATVVMGRRVGPGKTLELCLSIQCSKPRCTRLQAPAAASAAATPKSTGLINPAVCEKISLCNFSMKKKKKNQQLQQKQKKKDTGVWTGLGWGKGAAAEGRRWRRRIQAPRSKSILCSSSVSVAELSGEDGDDIANVMFEPMFEANPSDISIKRTSKITVVGVGNVGMACAQTILTQDLTDELALVDILPDKLRGEMLDLQHAAAFLPRAKIVAHTDYAITAESDICIVTAGARQREGESRLTLVERNVSFFKQIIPQLAKYSPNAILLIIANPVDALTYVSRRLSGFPTNRVIGSGTNLDSSRFRWILADRLEVNAQNVHGYIVGEHGDSSVPLWSSVNVAGVPLLQLLQNKGIHYGKHTQEEIHRMVVDGAYEVIKLKGYTSWAIGYSVASLVKSLL…
Sphfalx11G023300.1.p		Group Ⅲ	Sphagnum fallax	439	MRIGVIGQVGSYHLETSSLRKQCNPKLRCQQEAAAALSKYNNGNFTNPAVCCREISLSWSTQKKMKRNGLECRAEATGSIRATAASIEVGSSKRSPSSLEIAGASIVETMFQPVLDAGPPDHSGRRVSKVTVVGVGNVGMACAQTIITQDLADQIALVDISANKLRGEMLDLQHAAAFLPRADIVADTDYAITAHSDICIVTAGARQREGESRLALVERNVSFFKQIIPELVKYSPNAILLIISNPVDALTFVAWKLSGFPSNRVIGSGTNLDSSRFRWLMANRLQVNAHNVHGYIVGEHGDTSVPLWSSVNVGGVPMIQFLQDKGILVEKDTLEELHRMVVDGAYEVIKLKGYTSWAIGYSAASLVKSLLRDQRRIHPVSVCAKGFHGIEDEVFLSLP…
Sphfalx11G023300.2.p		Group Ⅲ	Sphagnum fallax	439	MRIGVIGQVGSYHLETSSLRKQCNPKLRCQQEAAAALSKYNNGNFTNPAVCCREISLSWSTQKKMKRNGLECRAEATGSIRATAASIEVGSSKRSPSSLEIAGASIVETMFQPVLDAGPPDHSGRRVSKVTVVGVGNVGMACAQTIITQDLADQIALVDISANKLRGEMLDLQHAAAFLPRADIVADTDYAITAHSDICIVTAGARQREGESRLALVERNVSFFKQIIPELVKYSPNAILLIISNPVDALTFVAWKLSGFPSNRVIGSGTNLDSSRFRWLMANRLQVNAHNVHGYIVGEHGDTSVPLWSSVNVGGVPMIQFLQDKGILVEKDTLEELHRMVVDGAYEVIKLKGYTSWAIGYSAASLVKSLLRDQRRIHPVSVCAKGFHGIEDEVFLSLP…
Sphfalx12G082100.1.p		Group Ⅲ	Sphagnum fallax	368	MASAETNTNGKIVFDSKSEAKVEYAPESAPKVALDIKKDLFQTLPGSCPLNTAKGSWKITVVGVGNVGMACAQTILTQNLADELALVDVEPNKLRGEMLDLQHAAAFLPRAKIVADTDYKITAGSAICIVTAGARQKPGESRLALVQKNVSILKSIIPQIVKYSPDAILLIISNPVDALTYVSWKLSGFPANRVLGSGTNLDSSRFRWLLADHLDVNAHNVHGYLIGEHGDSSVPVWSTVNVGGVSLLQFLKNNGIPYSQAILDEVHKKVVDGAYEVIQLKGYTSWAIGYSVASLVKCLLRDQRWIHPVSVCAKGFHGIEDEVFLSLPTQLGSSGVVGVLNVPLTDEERKKLQQSAQTLAEVQAELDI
Ceric.01G076800.3.p		Group Ⅰ	Ceratopteris richardii	294	MNPLVSVLHLYDVVNTPGVTADLSHTDTSTLVRGYVGKDQLEASLVGMDLVIIPAGVPRKPGMTRDDLFNINAGIVRTLCEGVAKCCPNAVVHIISNPVNSTVPIAAEVFKRKGVYDPRRLMGVTSLDVVRANTFVAEVLGVDPQLVDVPVIGGHAGITILPLLSQVKPAYSFTKDEVTYLTKRIQNGGTEVVEAKAGAGSATLSMAYAAAKFADSTLRALRGEAGVIQCAFVPSQVTDLPYFASKVWLGRNGVEEVLPLGPLNEYEREGLAKLKMELKASIEKGIAFVARQQL
Ceric.01G076800.1.p		Group Ⅰ	Ceratopteris richardii	351	MAAERLARMIKHLQPDQEAPGVLSMQDCRMQGGSPGFKVALLGASGGIGKPLALLLKMNPLVSVLHLYDVVNTPGVTADLSHTDTSTLVRGYVGKDQLEASLVGMDLVIIPAGVPRKPGMTRDDLFNINAGIVRTLCEGVAKCCPNAVVHIISNPVNSTVPIAAEVFKRKGVYDPRRLMGVTSLDVVRANTFVAEVLGVDPQLVDVPVIGGHAGITILPLLSQVKPAYSFTKDEVTYLTKRIQNGGTEVVEAKAGAGSATLSMAYAAAKFADSTLRALRGEAGVIQCAFVPSQVTDLPYFASKVWLGRNGVEEVLPLGPLNEYEREGLAKLKMELKASIEKGIAFVARQQL
Ceric.01G076800.2.p		Group Ⅰ	Ceratopteris richardii	351	MAAERLARMIKHLQPDQEAPGVLSMQDCRMQGGSPGFKVALLGASGGIGKPLALLLKMNPLVSVLHLYDVVNTPGVTADLSHTDTSTLVRGYVGKDQLEASLVGMDLVIIPAGVPRKPGMTRDDLFNINAGIVRTLCEGVAKCCPNAVVHIISNPVNSTVPIAAEVFKRKGVYDPRRLMGVTSLDVVRANTFVAEVLGVDPQLVDVPVIGGHAGITILPLLSQVKPAYSFTKDEVTYLTKRIQNGGTEVVEAKAGAGSATLSMAYAAAKFADSTLRALRGEAGVIQCAFVPSQVTDLPYFASKVWLGRNGVEEVLPLGPLNEYEREGLAKLKMELKASIEKGIAFVARQQL
Ceric.19G013200.3.p		Group Ⅲ	Ceratopteris richardii	247	MKCILNTFMFLQGKALNAVASENVKVLVVGNPCNTNALICMKNAPRIPKKNFHALTRLDENRAKCQLALKAGVFYDNVSNVTIWGNHSTTQVPDFVNAKIHGKPVTEVIKDKKWLEEEFTETVQKRGGALIKKWGRSSAASTAVSIADAMKSLVTPTREGDWFSSAVYTEGNPYGIDNDLIFSMPCRSKGDGDYEIVPDLQINEWLATRIKKSEEELISERSCVAHLIGQDNGYCDLTEDTRLPGEQ
Ceric.19G013200.4.p		Group Ⅲ	Ceratopteris richardii	293	MELEDSLYPLLRELNLGIDSYEVFRDADWALLIGAKPRGPGMERADLLDINGKIFAEQGKALNAVASENVKVLVVGNPCNTNALICMKNAPRIPKKNFHALTRLDENRAKCQLALKAGVFYDNVSNVTIWGNHSTTQVPDFVNAKIHGKPVTEVIKDKKWLEEEFTETVQKRGGALIKKWGRSSAASTAVSIADAMKSLVTPTREGDWFSSAVYTEGNPYGIDNDLIFSMPCRSKGDGDYEIVPDLQINEWLATRIKKSEEELISERSCVAHLIGQDNGYCDLTEDTRLPGEQ
Ceric.19G013200.1.p		Group Ⅲ	Ceratopteris richardii	458	MAEAVALSMSMGSYLKNSSLQATECSRQEPSSSLRSKFLGCKLTASQASLQLPSIKHTRRQRPCVIQCSVVQQSQVQAPDSVFITPDGRRAECYGVFCTIYDLNEVEKPKSWKKLLRVAVSGAAGTISNHLLFKIASGEVFGPDQPIALNLLGSERSRNALEGVAMELEDSLYPLLRELNLGIDSYEVFRDADWALLIGAKPRGPGMERADLLDINGKIFAEQGKALNAVASENVKVLVVGNPCNTNALICMKNAPRIPKKNFHALTRLDENRAKCQLALKAGVFYDNVSNVTIWGNHSTTQVPDFVNAKIHGKPVTEVIKDKKWLEEEFTETVQKRGGALIKKWGRSSAASTAVSIADAMKSLVTPTREGDWFSSAVYTEGNPYGIDNDLIFSMPCRS…
Ceric.19G013200.2.p		Group Ⅲ	Ceratopteris richardii	458	MAEAVALSMSMGSYLKNSSLQATECSRQEPSSSLRSKFLGCKLTASQASLQLPSIKHTRRQRPCVIQCSVVQQSQVQAPDSVFITPDGRRAECYGVFCTIYDLNEVEKPKSWKKLLRVAVSGAAGTISNHLLFKIASGEVFGPDQPIALNLLGSERSRNALEGVAMELEDSLYPLLRELNLGIDSYEVFRDADWALLIGAKPRGPGMERADLLDINGKIFAEQGKALNAVASENVKVLVVGNPCNTNALICMKNAPRIPKKNFHALTRLDENRAKCQLALKAGVFYDNVSNVTIWGNHSTTQVPDFVNAKIHGKPVTEVIKDKKWLEEEFTETVQKRGGALIKKWGRSSAASTAVSIADAMKSLVTPTREGDWFSSAVYTEGNPYGIDNDLIFSMPCRS…
Ceric.01G077000.1.p		Group Ⅰ	Ceratopteris richardii	352	MAGERLAKMIMHLQPEQEAAHGVLSMQRCRMQGGSPGFKVALLGASGGIGQPLALLLKMDPLVSVLHLYDIVNTPGVTADLSHTDTSTIVRGFVGKDQLEASLVGMDLVIIPAGVPRKPGMTRDDLFNINAGIVRTLCEGVAKCCPNAVVHIISNPVNSTVPIAAEVFKRKGTYDPRRLIGVTTLDVVRANTFVAEVLGVDPRLVDVPVIGGHAGITILPLLSQVKPVYSLTKDEVTYLTKRIQNGGTEVVEAKAGSGSATLSMAYAAAKFADSTLRALRGEAGIIQCAFVPSQVTDLPYFASKVLLGRNGVEEVFPLGPLNEYEREGLAKLKMELKASIEKGITFVATQSL
Ceric.16G039200.2.p		Group Ⅱ	Ceratopteris richardii	230	MTRDDLFNINAGIVKSLCTAISKHCPEAVVNMISNPVNSTVPIAAEVFKKASTYDSKKLFGVTTLDVVRARTFYAGKKGLAVEDVDVPVVGGHAGITILPLFSQATPKATLTDEEIDALTKRTQDGGTEVVQAKAGKGSATLSMAYAGALFAESCLKGLNGEPGIVECTYVASTVTELPFFSSKVRLGKDGVEEVLGLGALSEYEKKGLEAMKAELKASIQKGVDFAKQS
Ceric.16G039200.1.p		Group Ⅱ	Ceratopteris richardii	331	MTFAGLFRRAAPGALKHSRKVAILGAAGGIGQPLAMLMKLNPLVSSLSLYDIANTPGVAADVSHVNTRAEVKGYAGEEQLAEALTGADLVIIPAGVPRKPGMTRDDLFNINAGIVKSLCTAISKHCPEAVVNMISNPVNSTVPIAAEVFKKASTYDSKKLFGVTTLDVVRARTFYAGKKGLAVEDVDVPVVGGHAGITILPLFSQATPKATLTDEEIDALTKRTQDGGTEVVQAKAGKGSATLSMAYAGALFAESCLKGLNGEPGIVECTYVASTVTELPFFSSKVRLGKDGVEEVLGLGALSEYEKKGLEAMKAELKASIQKGVDFAKQS
Ceric.28G009700.3.p		Group Ⅰ	Ceratopteris richardii	244	MELVIIPAGVPRKPGMTRDDLFNINAGIVRTLCEGVAKCCPKAVVHVISNPVNSTVPIAAEVFKKAGTYDPRRLMGVTTLDVVRANTFVAEVLGLDPAIVKVPVIGGHAGITILPILSQVTPPSSFTKDEVEYLTNRIQNGGTEVVEAKAGAGSATLSMAFAAAKFADATLRALKGEAGIVECAFVASQVTELPFFASKVLLGRNGIDEILPLGPLNEYEREGLIKLKGELKASIDKGLAFAAK
Ceric.28G009700.2.p		Group Ⅰ	Ceratopteris richardii	324	MGICRAKGSSPGFKVALLGASGGIGQPLALLLKMNPHISVLHLYDVVNTPGVTADLSHTDTSAVVRGFVGKDQLEPALVGMELVIIPAGVPRKPGMTRDDLFNINAGIVRTLCEGVAKCCPKAVVHVISNPVNSTVPIAAEVFKKAGTYDPRRLMGVTTLDVVRANTFVAEVLGLDPAIVKVPVIGGHAGITILPILSQVTPPSSFTKDEVEYLTNRIQNGGTEVVEAKAGAGSATLSMAFAAAKFADATLRALKGEAGIVECAFVASQVTELPFFASKVLLGRNGIDEILPLGPLNEYEREGLIKLKGELKASIDKGLAFAAK
Ceric.28G009700.1.p		Group Ⅰ	Ceratopteris richardii	357	MAMETQDRYHRRLATLSAHLQPSSTQQGGSALQMGICRAKGSSPGFKVALLGASGGIGQPLALLLKMNPHISVLHLYDVVNTPGVTADLSHTDTSAVVRGFVGKDQLEPALVGMELVIIPAGVPRKPGMTRDDLFNINAGIVRTLCEGVAKCCPKAVVHVISNPVNSTVPIAAEVFKKAGTYDPRRLMGVTTLDVVRANTFVAEVLGLDPAIVKVPVIGGHAGITILPILSQVTPPSSFTKDEVEYLTNRIQNGGTEVVEAKAGAGSATLSMAFAAAKFADATLRALKGEAGIVECAFVASQVTELPFFASKVLLGRNGIDEILPLGPLNEYEREGLIKLKGELKASIDKGLAFAAK
Ceric.28G059400.3.p		Group Ⅰ	Ceratopteris richardii	231	MTRDDLFNINAGIVKSLVEAVADNCPNAWIHIISNPVNSMVPIAAEVLKKKGVYDPKKLFGVTTLDIVRANTFVAEKKGLRLIEVDVPVIGGHAGITILPLLSKTKPACEFTQEEIEKLTDRIQNGGTEVVEAKAGAGSATLSMAYASARFVESSLRALDGDSDVYECTYVQSELTELPYFASRVKLGKKGVEGFATSDLENLSPFEKEGLEKLKPELKASIDKGIAFANK
Ceric.28G059400.2.p		Group Ⅰ	Ceratopteris richardii	293	MSPLVSHLNLYDIANVKGVVADLSHCNTPAQVAGFTGPEELGDGLKGVDLVVIPAGVPRKPGMTRDDLFNINAGIVKSLVEAVADNCPNAWIHIISNPVNSMVPIAAEVLKKKGVYDPKKLFGVTTLDIVRANTFVAEKKGLRLIEVDVPVIGGHAGITILPLLSKTKPACEFTQEEIEKLTDRIQNGGTEVVEAKAGAGSATLSMAYASARFVESSLRALDGDSDVYECTYVQSELTELPYFASRVKLGKKGVEGFATSDLENLSPFEKEGLEKLKPELKASIDKGIAFANK
Ceric.28G059400.1.p		Group Ⅰ	Ceratopteris richardii	402	MALQMQATAKLTSLPSLSPQASPSPRSSISLPRFSGLRASLLNQDPTLSFSTQTSFFADGSLSALRHSPRHVSARRSISRPGVARAAVFKVAVLGAAGGIGQPLSLLIKMSPLVSHLNLYDIANVKGVVADLSHCNTPAQVAGFTGPEELGDGLKGVDLVVIPAGVPRKPGMTRDDLFNINAGIVKSLVEAVADNCPNAWIHIISNPVNSMVPIAAEVLKKKGVYDPKKLFGVTTLDIVRANTFVAEKKGLRLIEVDVPVIGGHAGITILPLLSKTKPACEFTQEEIEKLTDRIQNGGTEVVEAKAGAGSATLSMAYASARFVESSLRALDGDSDVYECTYVQSELTELPYFASRVKLGKKGVEGFATSDLENLSPFEKEGLEKLKPELKASIDKGIAF…
Ceric.16G081700.3.p		Group Ⅲ	Ceratopteris richardii	274	MDIMLFITGAVATTDVVEACKGVNIAIMVGGFPRKEGMERKDVMSKNVSIYKSQASALEEYAAKDVKVLVVANPANTNALILKEFAPSIPEKNITCLTRLDHNRALGQISERLDVPVSKVKNVIIWGNHSSTQYPDVSHAVVETEHGEQPVAKLVADDAWLHGEFISVVQQRGAAIIKARKLSSALSAASSACDHIRDWVLGTPKGTWVSMGVYSDGSYDVPPGLIYSYPVTCENGEWSIVQGLSVDEFSRGKLVATADELVEEKAMAYSCFSS
Ceric.16G081700.2.p		Group Ⅲ	Ceratopteris richardii	310	MIARGTMLGPDQPVILHMLDIPPAVESLNGVKMELIDAAFPLLKGAVATTDVVEACKGVNIAIMVGGFPRKEGMERKDVMSKNVSIYKSQASALEEYAAKDVKVLVVANPANTNALILKEFAPSIPEKNITCLTRLDHNRALGQISERLDVPVSKVKNVIIWGNHSSTQYPDVSHAVVETEHGEQPVAKLVADDAWLHGEFISVVQQRGAAIIKARKLSSALSAASSACDHIRDWVLGTPKGTWVSMGVYSDGSYDVPPGLIYSYPVTCENGEWSIVQGLSVDEFSRGKLVATADELVEEKAMAYSCFSS
Ceric.16G081700.1.p		Group Ⅲ	Ceratopteris richardii	333	MAKDPVRVLVTGAAGQIGYALVPMIARGTMLGPDQPVILHMLDIPPAVESLNGVKMELIDAAFPLLKGAVATTDVVEACKGVNIAIMVGGFPRKEGMERKDVMSKNVSIYKSQASALEEYAAKDVKVLVVANPANTNALILKEFAPSIPEKNITCLTRLDHNRALGQISERLDVPVSKVKNVIIWGNHSSTQYPDVSHAVVETEHGEQPVAKLVADDAWLHGEFISVVQQRGAAIIKARKLSSALSAASSACDHIRDWVLGTPKGTWVSMGVYSDGSYDVPPGLIYSYPVTCENGEWSIVQGLSVDEFSRGKLVATADELVEEKAMAYSCFSS
Ceric.37G012200.3.p		Group Ⅲ	Ceratopteris richardii	361	MSNRQDEGLSAFARRMHASGTNLEQHTPNSIFSRIPGSEIPQHKIKHSAKVTVVGVGNVGMACAQTMLSAGLLNELALVDVLEDRLQGELLDLQHSAAFLPRVKIVADTDYGVSADSDICIVTAGARQREGESRIDLLDRNVNLFKKIIPELVRHSPDTILLIVSNPVDILAYVSWKLSGLPPNRVIGSGTNLDSSRLRSLLADKFEVSALNVHGYIIGEHGDNSVPLWSSLSVANVPVLNFHDKKGVQYNKETLEEFHKAVVKSAYEVIRLKGYTSWAIGFSVASIVKSLLRDQMHVHPVSVLANSFYGIDYDVFLSLPAQLGSAGVLGIANLPITEDEAQRLQNSAKILRGMLDKSKMQ
Ceric.37G012200.4.p		Group Ⅲ	Ceratopteris richardii	361	MSNRQDEGLSAFARRMHASGTNLEQHTPNSIFSRIPGSEIPQHKIKHSAKVTVVGVGNVGMACAQTMLSAGLLNELALVDVLEDRLQGELLDLQHSAAFLPRVKIVADTDYGVSADSDICIVTAGARQREGESRIDLLDRNVNLFKKIIPELVRHSPDTILLIVSNPVDILAYVSWKLSGLPPNRVIGSGTNLDSSRLRSLLADKFEVSALNVHGYIIGEHGDNSVPLWSSLSVANVPVLNFHDKKGVQYNKETLEEFHKAVVKSAYEVIRLKGYTSWAIGFSVASIVKSLLRDQMHVHPVSVLANSFYGIDYDVFLSLPAQLGSAGVLGIANLPITEDEAQRLQNSAKILRGMLDKSKMQ
Ceric.37G012200.2.p		Group Ⅲ	Ceratopteris richardii	399	MHSGSRFLRQASSRLLYGFGRSQLHLRPGFTLSILNSSMSNRQDEGLSAFARRMHASGTNLEQHTPNSIFSRIPGSEIPQHKIKHSAKVTVVGVGNVGMACAQTMLSAGLLNELALVDVLEDRLQGELLDLQHSAAFLPRVKIVADTDYGVSADSDICIVTAGARQREGESRIDLLDRNVNLFKKIIPELVRHSPDTILLIVSNPVDILAYVSWKLSGLPPNRVIGSGTNLDSSRLRSLLADKFEVSALNVHGYIIGEHGDNSVPLWSSLSVANVPVLNFHDKKGVQYNKETLEEFHKAVVKSAYEVIRLKGYTSWAIGFSVASIVKSLLRDQMHVHPVSVLANSFYGIDYDVFLSLPAQLGSAGVLGIANLPITEDEAQRLQNSAKILRGMLDKSKMQ
Ceric.37G012200.1.p		Group Ⅲ	Ceratopteris richardii	417	MRGSIVSLRRVFSIMLTIWMSCFLGHIRKPSSCLRLLFRSQLHLRPGFTLSILNSSMSNRQDEGLSAFARRMHASGTNLEQHTPNSIFSRIPGSEIPQHKIKHSAKVTVVGVGNVGMACAQTMLSAGLLNELALVDVLEDRLQGELLDLQHSAAFLPRVKIVADTDYGVSADSDICIVTAGARQREGESRIDLLDRNVNLFKKIIPELVRHSPDTILLIVSNPVDILAYVSWKLSGLPPNRVIGSGTNLDSSRLRSLLADKFEVSALNVHGYIIGEHGDNSVPLWSSLSVANVPVLNFHDKKGVQYNKETLEEFHKAVVKSAYEVIRLKGYTSWAIGFSVASIVKSLLRDQMHVHPVSVLANSFYGIDYDVFLSLPAQLGSAGVLGIANLPITEDEAQR…
Ceric.13G041200.3.p		Group Ⅲ	Ceratopteris richardii	300	MACAQTCLTEDLVDELALVDIQADKLRGEMLDLQHAAAFLPRVKIVADTDYAISAGSDICIVTAGARQREGESRPSLLGRNLTLFKSIIPQLVHYSPNAILLIVSNPVDILTYVSWKLSGFPPNRVIGTGTNLDSSRLRFLIADKFDVNAHNVHGYMVGEHGDSSVPLWSTLTLANVPVLNVRDKNGVSYSKESLQELHRTVVESAYEVIKLKGYTSWAIGYSTASLVKSLLRDQRRIYPVSVRAKGFYGIENEVYLSLPSQLGRAGVLGVANVKMGEEEMQKLQQSAKTIWKLQSELEF
Ceric.13G041200.2.p		Group Ⅲ	Ceratopteris richardii	342	MSGDNMERGGVKPLFVKIPGSDLPTQIETRFKVTVVGVGNVGMACAQTCLTEDLVDELALVDIQADKLRGEMLDLQHAAAFLPRVKIVADTDYAISAGSDICIVTAGARQREGESRPSLLGRNLTLFKSIIPQLVHYSPNAILLIVSNPVDILTYVSWKLSGFPPNRVIGTGTNLDSSRLRFLIADKFDVNAHNVHGYMVGEHGDSSVPLWSTLTLANVPVLNVRDKNGVSYSKESLQELHRTVVESAYEVIKLKGYTSWAIGYSTASLVKSLLRDQRRIYPVSVRAKGFYGIENEVYLSLPSQLGRAGVLGVANVKMGEEEMQKLQQSAKTIWKLQSELEF
Ceric.18G010800.3.p		Group Ⅲ	Ceratopteris richardii	271	MLDLQHAAAFLPRVNIMADSDYAVSEGSDICIVTAGARQREGESRLSLLGRNLSLFKSIIPQLVRYSPDTILLIVSNPVDILTYLSWKISGFPPNRVIGTGTNLDSSRLRFLIADKFDVNAHNVHGYMVGEHGDSSVPLWSTLTIANMPVLSICDKDGVKYSRESLQELHKMVVGGAYEVIKLKGYTSWAIGYSTASLVKSLLRDQRRIHPVSVLAKGFYGIDKDVYLSLPSQLGRAGVLGVASVQMIEEERRKLHESSETIWDIQNQLQI
Ceric.13G041200.1.p		Group Ⅲ	Ceratopteris richardii	394	MDIITKSCFSSSVRLSDSNHAVSLGFAHLQASTRFFPQTASVSFIRRKCVRAMSGDNMERGGVKPLFVKIPGSDLPTQIETRFKVTVVGVGNVGMACAQTCLTEDLVDELALVDIQADKLRGEMLDLQHAAAFLPRVKIVADTDYAISAGSDICIVTAGARQREGESRPSLLGRNLTLFKSIIPQLVHYSPNAILLIVSNPVDILTYVSWKLSGFPPNRVIGTGTNLDSSRLRFLIADKFDVNAHNVHGYMVGEHGDSSVPLWSTLTLANVPVLNVRDKNGVSYSKESLQELHRTVVESAYEVIKLKGYTSWAIGYSTASLVKSLLRDQRRIYPVSVRAKGFYGIENEVYLSLPSQLGRAGVLGVANVKMGEEEMQKLQQSAKTIWKLQSELEF
Ceric.18G010800.2.p		Group Ⅲ	Ceratopteris richardii	329	MFTTIPGSDLPYHVKTSSKITVVGVGNVGMACAQTCVTEGLVDELALVDIQADKLRGEMLDLQHAAAFLPRVNIMADSDYAVSEGSDICIVTAGARQREGESRLSLLGRNLSLFKSIIPQLVRYSPDTILLIVSNPVDILTYLSWKISGFPPNRVIGTGTNLDSSRLRFLIADKFDVNAHNVHGYMVGEHGDSSVPLWSTLTIANMPVLSICDKDGVKYSRESLQELHKMVVGGAYEVIKLKGYTSWAIGYSTASLVKSLLRDQRRIHPVSVLAKGFYGIDKDVYLSLPSQLGRAGVLGVASVQMIEEERRKLHESSETIWDIQNQLQI
Ceric.18G010800.1.p		Group Ⅲ	Ceratopteris richardii	395	MEASATTFFSCSLRSSATDRGRSLCFPQLKSSSKHLFSPSGRVSFSRPRNVLAVSADHHEPDGAKPMFTTIPGSDLPYHVKTSSKITVVGVGNVGMACAQTCVTEGLVDELALVDIQADKLRGEMLDLQHAAAFLPRVNIMADSDYAVSEGSDICIVTAGARQREGESRLSLLGRNLSLFKSIIPQLVRYSPDTILLIVSNPVDILTYLSWKISGFPPNRVIGTGTNLDSSRLRFLIADKFDVNAHNVHGYMVGEHGDSSVPLWSTLTIANMPVLSICDKDGVKYSRESLQELHKMVVGGAYEVIKLKGYTSWAIGYSTASLVKSLLRDQRRIHPVSVLAKGFYGIDKDVYLSLPSQLGRAGVLGVASVQMIEEERRKLHESSETIWDIQNQLQI
Ceric.13G041100.1.p		Group Ⅲ	Ceratopteris richardii	303	MLEWPAHRQCLTRDLVDELALVDTQADKLRGEMLDLQHAAAFLPRVKIVADTDYAISAGSDVCIVTAGARLREGESRPSLLGRSLTLFKSIIPQLVHYSPNAILLIVSNPVDILTYVSWKLSGFPPHRVIGTGTNLDSSRLRFLIADKFDVNAHNVHGYMVGEHGDSSFPLWSTLTLANVPILNVPDKNGVSYNKESLHELHRTAMERAHEVIKLKGYTSWAIGYSTASLVKSLLRDQWQIHLVSVQAKGFYGIENEVYLSLPSQLGRAGVLGVANVKMGEEEMQKLQQSAKTIWKLQSELEI
Cula0003697	ClMDH1	Group Ⅰ	Cunninghamia lanceolata	421	MASATLSMSKVSAPGFLPSISEPRLSGAGSHLRSSVVRFPSKLSSKIFSGLKAGISCESEANFFGSETNAVLRSSINIPRSAEKRQISAKAGQASSSAEGFKVAILGAAGGIGQPLSLLIKMFPLVSVLNLYDIANVKGVAADLSHCNSPAQVQDFTGPTELGNSLKGVDVVVIPAGVPRKPGMTRDDLFNINAGIVKTLIEAVADNCPNAFIHIISNPVNSTVPIAAEVLKQKGVYDPKKLFGVTTLDVVRANTFVAQKKNLKLASVDVPVVGGHAGITILPLLSKTKPYVTFTQEEIEPLTVRIQNAGTEVVEAKAGAGSATLSMAYAAARFVESSLRALDGDPDVYECSYVQSELTELPFFASKIKLGKEGVEAVLPDILEGLTEYEQKALEALKP…
Cula0024212	ClMDH2	Group Ⅰ	Cunninghamia lanceolata	415	MAAATLSMNVVSKSQLQSNARQNHLSVTGLPSNVPAQSLSVRNTIKGFSGLKASNLQTTFFGQEMKGAFQVSFGNSRVGKKRRATVRPVQVRASVFKVAVLGAAGGIGQPLSLLIKMSPLVSELNLYDIANVKGVVADLSHCNTPAQVFAFTGSAELGDSLKGVDVVVIPAGVPRKPGMTRDDLFNINAGIVKNLIEAVADNCPNAFVHIISNPVNSTVPIAAEVLKQKGVYNPKKLFGVTTLDVVRANTFVARKKNLRLIDVDVPVIGGHAGITILPLLSKTRPSVTFTQDEVEELTLRIQNAGTEVVEAKAGAGSATLSMAYAAARFVESSLRALDGDPDVFDSSYVQSELTELPFFASRVKLGKQGIEGFVVSDVEGLTEYEQKALKALKPELKAS…
Cula0037109	ClMDH3	Group Ⅱ	Cunninghamia lanceolata	343	MRSAVRRVVGSALRNASARDYSSGATPPRKVVVLGAAGGIGQPLSLLMKLNPYVSQLSLYDIAGTPGVAADVSHVNTRAEVAGYMGEEQLGKALENADIVIIPAGVPRKPGMTRDDLFNINAGIVKNLCAAIAKYCPGALVNMISNPVNSTVPIASEVFKKAGTYDEKKLFGVTTLDVVRARTFYAGKAGVPVEGVDVPVVGGHAGITILPLFSQATPKANSTLGEEDIKALTKRTQDGGTEVVEAKAGKGSATLSMAYAGALFANACLKGLNGEPNVVECSYVQSTVTELPFFASKVRLGKNGLEEVLGLGSLSEYEQQGLELLKPELKSSIEKGIKFASEN
Cula0001757	ClMDH4	Group Ⅰ	Cunninghamia lanceolata	354	MADRTSARIARISSHLAGSHTNRVHENGVQREDCRAKGGAGGFKVAVLGASGGIGQPLSLLMKLNPLVSVLNLYDVVNTPGVTADISHMDTSAVVRGFLGKDQLEDALVGMDLVIIPAGIPRKPGMTRDDLFKINAGIVRTLCEGVAKCCPNALLNIISNPVNSTVPIAAEVLKKAGVYNPKRLLGVTTLDVVRANTFVAEVVGVDPKGIDVPVVGGHAGITILPLLSQVNPKFSFTKEETEYLTNRIQNGGTEVVEAKAGTGSATLSMAFAAAKFADACLRGLRGDAGVEYCAFVASEVTELPFFASKVRLGRTGVEEVFPLGPLNSYERSGLEKLKKELQASIDKGIAFARQ
Cula0023270	ClMDH5	Group Ⅱ	Cunninghamia lanceolata	229	MVILLASDKSIWDAEPRSEIRKVTSRESKVAGYMGEEQLGKALENANIVIIPAGVPRKRGTTRDDLFNINAGIVKNLCAAIAKYRPGALVNMIINPINSTVPNASKVFKKAGTYDEKKLFGVSTLDVVFVEAKAGKGSATLSMAYVGALFANACLKGLNGEPNVVECSYVQSTITELPFFASKVRLGKNGLEEVLVLGSLSEYEKHGLELLKPNLKASIEKGIKFASEN
Cula0034819	ClMDH6	Group Ⅲ	Cunninghamia lanceolata	332	MAKNPVRVLVTGAAGQIGYALVPMIARGIMLGADQPVILHMLDIPPAAESLNGVKMELIDAAFPLLKGVVATTDVVEACTGVNIAVMVGGFPRKEGMERKDVMSKNVSIYKSQASALEQHAAPDCKVLVVANPANTNALILKEFAPSIPEKNITCLTRLDHNRALGQVSERLRVPVSNVKNVIIWGNHSSSQYPDVNHAVVETEAGEKPVRQLVADDVWLNGEFITTVQQRGAAIIKARKLSSALSAASAACDHIRDWVLGTPKGTWVSMGVYSDGSYDVPSGVIYSYPVTCENGKWSIVQGLHIDEFSRKKLDATANELVEEKALAYSCLS
Cula0019472	ClMDH7	Group Ⅲ	Cunninghamia lanceolata	349	MEKGKRSTSYGDLGIDIAGSFFKSIEGVGPLSPSGGNTKITVVGVGNVGMAIAQTILTQELTSELVLIDVQAEKLRGEMLDLQHAAAFLPRTKIMADTDYAVSAGSDMCIITAGARQREGESRLALVERNLQLFKSIVPLVAKYSPNAILLVVSNPVDVLTYIAWKLSGFPSNRVIGSGTNLDSSRFRFMIADHLDVNAQDVQAYMIGEHGDSSVALWSSISVGGMPVLSFLDKNQIPYEKHHLEAIHHAVVNSAYEVIKLKGYTSWAIGYSAANLAKSLLRNQRRIHPVSVLAKGFHGIEEEVFLSLPAQLGRGGVLGVVNIHLTEEETLRLGKSARAILDVQQRLSI
Cula0004227	ClMDH8	Group Ⅲ	Cunninghamia lanceolata	354	MSLSATTPTTTIRLFYSHPQATKFGPKKNRSRCAAATNPRASHSSQGLSTQRADALMKPIHGSGPSSPAHRNGKITVVGVGNVGMAIAQTILTQDLTDDLTLLDIQPDKLRGEMLDLQHAAAFLPRTNIRADTDYAVTAGSDLCIITAGARQRQGESRLDLLHRNLSLFTSIVPQLVKHSPEALLMVVSNPVDVLSYMTWKLSGLPPNRVVGSGTNLDSSRLRFSIAEQLNVNAQDVQALIVGEHGDSSVALWSTASVGGVPLLTFLESTQQRPFPLEELHQGVINSAYEVIKLKGYTSWAVGYSAASLARSVLRNQRRIHPVSVLAKGFYGIEDEVFLSLPVTAWERRGFGRC
Cula0021438	ClMDH9	Group Ⅲ	Cunninghamia lanceolata	336	MEKGKRSVSSGDLGIDIVGSFFKPIQGAAPLYPSGRNTKITVVGVGNVGMAVAQTILTQDLTSELALVDVDKEKLRGEMLDLQHAAAFLPRTKIMASSDYSVSAGSDICIITAGARQREGESRLSLVGRNVQLFKSIVPQVAKHSPDAILLVVSNPVDILTYVAWKLSGFPSNRVIGSGTNLDSSRFCFMIAEHLDHGDSSVALWSSISVGGMPVVGFLDKQQIPYEKHHLEAIHQAVVNSAYEVIELKGYTSWAIGYSAANLVKSLLRNQRRIHPVSVLAKGFHGIEEEVFLSLPALLGRGGILSAVNIHLTEEETHQLRNSAQAIFDVQNQLSS
Cula0000892	ClMDH10	Group Ⅲ	Cunninghamia lanceolata	240	MADTDYAITADSDLCIITIGARQRQGELRLDLLHQNFSLFTSIIPQLVKHSPEALLMVVLNPVDVLSYMTWKLLGLLPNRVVGSGTNLDSSRLRFSIAEQLNVNAQDVQALIVGEHGDSLVALWSTASVGGVPLLSFLEMQQRPFPLEDLHQGVINSAYEVIKLKWYTSWAMGYSAASLARSVLRNQRRIHPISVLAKGFYGIEDKVFLSLPVLLGRGGVLGVADIPLTPQENEWLKHSA
Cula0020757	ClMDH11	Group Ⅲ	Cunninghamia lanceolata	441	MAAADISLSRPLLQRKEISSSSFVPQKSVKFNFKRSHAKKGFRLAKISCSVAPSQTETPTSAPDITLTPEGKKKECFGVFCLTYDLKEEEKTKSWKKLIKVAVSGAAGMISNHLLFKIASGEVFGPDQPVALNLLGSEKSFSALEGVAMELEDSLYPLLREVSIGVDPYEVFRDAEWALLIGAKPRGPGMERADLLDINGKIFAEQGKALNAVASQNVKVIVVGNPCNTNALICLKNAPNIPPKNFHALTRLDENRAKCQLALKAGVFYDNVSNMTIWGNHSTTQVPDFVNAKIHGIPVTEIITDTKWLEEEFTERVQKRGGVLIKKWGRSSAASTAVSIVDAVKSLVIPTPPGDWFSSGVYTTGNPYGIAEDIIFSMPCRSKGDGDYELATDILINDY…
Cula0022982	ClMDH12	Group Ⅲ	Cunninghamia lanceolata	275	MEKYEVKSLVVEKKGYALVPMIARGIMLGIDQLVILYMLDILAEVVSVNGLKMELIDSAFPLLKGVVATTDVVEACASVNIAVMVGGFPRKEGMERKDIMSKNVFLVVANPTNTNKSITCLTRLDHNRALGQVLERLSMPVSNVKNVIIWGNHSSSQYHDVNHAVVETEAGEKPVRQLVADDVECITTVQYCGAAIIKARKLSSALSVASAACDHSDLRAINMLQWNLIMGVMSTHQRPTTCKNLFSSFDIVLALNYGFSLKKIVFTKDSLSLLL
90290|PACid:15411215		Group Ⅱ	Selaginella moellendorffii	358	MNFRAAGIFRATAMEASKLVLRRAFARSASSAKRRVVILGANGGIGQPLSLLMKLSPLVSDLGLYDIVGTPGVAADVSHVNSRAQVAGFAGEENLGKCLKDADLVIIPAGVPRKPGMDRDDLFNVNAGIVQTLCTAVAKNCPKALVNIISNPVNSTVPIAAEVFKKSGTYDPNRLFGVTTLDVVRARTFLASAKKLNPSEVDLPVIGGHAGATILPLFSQASPKVSLSTKELDALTKRTQDGGTEVVKAKAGKGSATLSMAYAGALFAEACLKGLNGVNNVIECTYVESSVVPGLSFFSSKVRLGKEGVDEILELGSLSDYEQKGLEAMKDELKKSIEKGRKFVQSGGGGGGGKKKKK
270710|PACid:15422450		Group Ⅲ	Selaginella moellendorffii	447	MAAAVAASQAALFKSPFQSLDSCDEQKSVKFRSTFHGSRRISKAAGWSRHLLARQQHRITCSVNAPSPAQAPPLPKGAECYGVFCVIYDLKEEEKPKSWKKKLVRVAVSGAAGTISNHLLFKIASGEVFGPDQPVALNLLGSERSKEALEGVAMELEDSLYPLLREVIIGIDPYEVFRDAEWALLIGAKPRGPGMERADLLDINGQIFAAQGRALNEVASSNVKVVVVGNPCNTNALICMKNAPRIPSKNFHALTRLDENRAKCQLALKAGVFYDNVSNVTIWGNHSTTQVPDFLNAKINGRPVKEVITDHKWLEEQFTPTVQTRGGVLIKKWGRSSAASTAVSIVDAMKSLVQPTPPGDWFSSGVYAAGNPYGIDGDLVFSLPCRSKGDGDYEIVPGL…
270780|PACid:15422646		Group Ⅰ	Selaginella moellendorffii	352	MAESRARGRLWRMSSHLNPSDGVSMEVCRAKGGATGSRVAILGAAGGIGQPLSLLLKMNPLVSTLNLYDVVNTPGVTADVSHIDASAVVRGFLGKDQLDSALEGVDLVIIPAGIPRKPGMSRDDLXXXXXXXXXXXXXXXXXXXXXXXXXXXXXXVNSTVPIAAEVFKKAGTYDPRRLFGVTTLDVVRANTFVAEVVGLDPKLISVPVVGGHAGITILPLLSQPLQVTPAIRFSDEERHYLTNRIQNGGTEVVEAKAGTGSATLSMAYAAAKFADACLRALKGEDGIVECSFVASQVTDLPYFSSRVKLGRNGAEEILPLGPLTEYERKGLEAMKKELQGSIDKGIQFVTSA
271992|PACid:15404726		Group Ⅲ	Selaginella moellendorffii	331	MAKQPVRVLVTGAAGQIGYALVPMIARGVMLGPDQPVILHMLDIPPAAESLNGVKMELIDSAFPLLKGVIATTDVEEACKDVNIAVMVGGFPRKEGMERKDVMSKNVSIYKSQASALEKCAAKDVKVLVVANPANTNALILKEFAPSIPDKNITCLTRLDHNRALGQISERTGFQVSDVKNVIIWGNHSSTQYPDVNHAVVITPKGEKPVREVVNDDEWLNGPFITTVQQRGAAIIKARKLSSALSAASSACDHIRDWVLGTPKGTWVSMGVLSDGSYKVPKGVIYSFPVTCANGEWSIVQGLLIDGFSRTKLDATADELIEEKEMAYSCL
133026|PACid:15405148		Group Ⅰ	Selaginella moellendorffii	351	MHDISLRNHKPLVTVAARNADVRPRAAATYKAAVLGAGGGIGQPLSLLLKMSPLLSHLNLYDIANVKGVAADLSHCNTPSLVTPYTGAEELAESLKGVDLIIIPAGVPRKPGMTRDDLFNINAGIVKTLVEAAADYAPKAWINIISNPVNSTVPIAAEVLKKKGVFDPKKLFGVTTLDVVRANTFVAQQKTLRLIDVDVPVVGGHAGITILPLLSKTRPKTEFTQEEIEKLTVRIQNAGTEVVEAKAGAGSATLSMAYAAARFAESCLRAIDGDADVYECTYVKSDVMQELPFFASRVKLGKDGVEAFVHTDIRGLTEYEEKALQALIPELKGSIEKGINFVNKQPAAASV
89860|PACid:15412504		Group Ⅱ	Selaginella moellendorffii	341	MSSVPGGKPLPVRKPLPYRRVTVLGAAGGIGQPLSMLLKLNPLVSKLSLYDIAGTPGVATDLSHINTRTEVHGFAGDDQLKDALKDADLVIIPAGVPRKPGMTRDELFDINAGIVKKLVQAIAKHCPFALINMISNPVNSTVPIAAEVLKVEGTYDHTRLFGVTTLDVVRARTFYAKAKNLPIEDVDVPVVGGHAGKTILPLFSQATPQVPLSKEEVEELTRKTQDGGTEVVQAKAGKGSATLSMAYAAALFAESCLKAMNGEPNIIECAYVGSSVTDYPFFASKVELGKHGMVKALELGPISKYEQTCLDEMKDELMGSIDKGVAYVHNTESEKIIESLK
425558|PACid:15405919		Group Ⅲ	Selaginella moellendorffii	345	MEHPGLSQRGCGNAAWQMMASVIVRGTGGGIALQSSCAVNDIIAGRVATLESPEHKTFTSVAPATEDLVDVEGPVKGPALPAVGDGFPGCSFTAIKFHSNLHSSAQGLQPKVTILVGRFHGLEFVEGMLFRDEHFAYPYHDMDKQQLEALRGCRGKPFFGLERNWWTENMLWSMGDFWCKILPERVYDNQDFPAGSEQCRMIFEKLRGRPGFAPNDNDREELTREWAAETISVLAKDSWLPDQILAHKLVFLGQTAPCCGWDVFSSLVTRLGTAAVFERGDFERWQADVPGGRNCCRPALGNHAPEAGTPSSWLRTLEDGFSMSLWQLLATPDHERCACLQGSAG
405919|PACid:15416888		Group Ⅲ	Selaginella moellendorffii	300	MACAQTILTQELAEELALIDVNPDKLRGEMLDLQHAAAFLQRATISASTDYAASAGSDVCIITAGARQREGETRLDLTARNAALYRKIVPELVRHSPGAVLLVVSNPVDVLAWATWQLAGSVLPATRVIGSGTNLDTARLRFLLAEQMGANARDVQAYVLGEHGDSSVPVWSTVSVAGRILREEWGPSSSAELEELHRGVVESAYEVIRLKGYTSWAIGYSTASIVRNILRDQRRICPVSVMAKGFHGIEEEVFLSLPVQLGRNGVVSVVNAPLSEEEAAKLRGSAKTLWNVQQQLKLLD
92401|PACid:15418338		Group Ⅲ	Selaginella moellendorffii	340	MAVADIVQRDVTKVTVVGVGNVGMACATSILSKRLCRSLVLIDVMGDKLKGEMMDLQHAAAFNPNVDICASTDYANTRNSQICIITAGAKQKSHDESRLALVQSNVELLRKIIPELLKYSPDTLLLVVSNPVDILTYVSWKISGLPASRVLGNGTNLDSSRFRFLISSRMDVSSKNVHGYIIGEHGDSSVPVWSSVNVAGVPLLNFIEKEGLESEAEKINQEVRVYQQDFLTLFHLVRLKQVVKSAYEIIKFKGYTNWAIGASVADIVHSLIRDEKAIHPVSIIAKGRHGIEHDVFLSLPCVLGRNGVLHIVEQTLTENEVLKLKESAQSLWDVVKNVEL
421109|PACid:15413480		Group Ⅲ	Selaginella moellendorffii	217	MRFTALINQKCHVKNKDLDGIYVFDRDTFSEDDTMGDVSVDLQPLYAAVKAQEAMGDELGNVQSQASALEKCAAKDVKVLVVANPAKTNALILKNFAPSIPDKNITCLTKLDHNRVLGQISKSTWTLNGPFVSTIQHCGAAIIKERKLSSALSTASSAYDHICDWVLGIPKGTWVSMGVLSDGSYKVPKGVIYSLLTCANWEWSIVQGLSIDGFSRT
437801|PACid:15421109		Group Ⅲ	Selaginella moellendorffii	360	MASNLSFWELDPFFPAAEEVQNSTDRMESIYRAWKYTQGVAQETPEDSSIIAAVKANKRDLITALDTVRWQLEEFARAVKVATNAAAERVYLGEDAKSRHTQFVNAIQSQVCNMEKEIGDSLEKKKLKYASIGEADSKCLALFLSGSDDVDSSSPTAIAVQEREVEQGNDNDVLLDSLPSISIRIDTVDGCNGFCHHNERNGFFSSGSSSSSSSGSSSSSRDGLIESKSFWNSVAGILFWRARDHQSKMQMSASVLKRWKDGDAGFLDRAEECMSALKNRCLGRNNGRKQSSGSPRLFGLLGDHSGAVIQRRFLRASEVGDAAKIGFGALVVIGLMGLYFWFLSTLVPLDHQPVPGSFLN
Thupl.29378352s0001.1.p		Group Ⅲ	Thuja plicata	441	MAAADISLPRALLQRKEIYSSSFLPKKSVKFNFRRSNAKQDFRIAKISCSVAPSQTETPAPAPDITITLEGNKKECFGVFCLTYDLKEEEKPKTWKKLIKIAVSGAAGMISNHLLFKIASGEVFGQDQPVALNLLGSERSFSALEGVAMELEDSLYPLLREVSIGVDPYDVFRDADWALLIGAKPRGPGMERADLLDINGKIFAEQGKALNAVASKNVKVIVVGNPCNTNALICLKNAPNIPPKNFHALTRLDENRAKCQLALKAGVFYDNVSNMTIWGNHSTTQVPDFVNAKIHGIPVTQIITDTKWLEEEFTEKVQKRGGVLIKKWGRSSAASTAVSIVDAVKSLVIPTPPGDWFSSGVYTTGNPYGIAEDIIFSMPCRSKGDGDYELATDVLINDF…
Thupl.29380908s0004.1.p		Group Ⅱ	Thuja plicata	343	MRSAMQRVLGTSLRRASSRNYSSEALPPRKVVVLGAAGGIGQPLSLLMKLNPYVSQLSLYDIAGTPGVAADVSHVNTRAEVAGYMGEEQLAKALENADIVIIPAGVPRKPGMTRDDLFNINAGIVKNLCSAIAKYCPGALVNMISNPVNSTVPIASEIFKKAGTYDEKKLFGVTTLDVVRAKTFYAGKAGVPVEGVDVPVVGGHAGITILPLFSQATPKPNSTFSEEDIKALTKRTQDGGTEVVEAKAGKGSATLSMAYAGALFANACLKGLNGEPNIVECSYVQSTVTELPFFASKVRLGKNGLEEVLGLGSLSEYEKQGLESLKPELKSSIEKGIKFASEN
Thupl.29377001s0021.1.p		Group Ⅰ	Thuja plicata	354	MADRTSARLARISSHLAGSHSNSIHENGVEREDCRAKGGAGGFKVAVLGASGGIGQPLSLLMKMNPLVSVLHLYDVVNTPGVTADVSHMDTSTVVRGFVGKDQLEDALVGMDLVIIPAGIPRKPGMTRDDLFKINAGIVRTLIEGVAKCCPNALLNIISNPVNSTVPIAAEVLKKAGTYNPKRLMGVTTLDVVRANTFVAEVVGVDPKDVDVPVVGGHAGITILPLLSQVNPKFSFTNEETEFLTNRIQNGGTEVVEAKAGTGSATLSMAFAAAKFADACLRGLRGDASVECCAFIASQVTELPFFASKVRLGRAGVEEVFPLGPLNSYERSGLEKLKKELQESIDKGIAFVRQ
Thupl.29377356s0004.7.p		Group Ⅰ	Thuja plicata	301	MFPLVSVLNLYDIANVKGVAADLSHCNSPAQVQDFTGPTELANSLKGVDVVVIPAGVPRKPGMTRDDLFNINAGIVKNLIEAVADNCPNAFIHIISNPVNSTVPIAAEVLKQKGVYDPKKLFGVTTLDVVRANTFVAQKKNLKLASVDVPVVGGHAGITILPLLSKTKPYVTFTQEEVESLTVRIQNAGTEVVEAKAGAGSATLSMAYAAARFVESSLRALDGDQDVYECSYVQSELTELPFFASKIKLGKEGVEGVLPDVLEGLTEYEQKALEALKPELKGSIEKGIAFANKQATAGAAV
Thupl.29377356s0004.5.p		Group Ⅰ	Thuja plicata	380	MSSKIFSGLKAGIASESEVNSFNSATNAVLRSSINAIKSAEKRQIIAKAGQASSSAEGFKVAILGAAGGIGQPLSLLIKMFPLVSVLNLYDIANVKGVAADLSHCNSPAQVQDFTGPTELANSLKGVDVVVIPAGVPRKPGMTRDDLFNINAGIVKNLIEAVADNCPNAFIHIISNPVNSTVPIAAEVLKQKGVYDPKKLFGVTTLDVVRANTFVAQKKNLKLASVDVPVVGGHAGITILPLLSKTKPYVTFTQEEVESLTVRIQNAGTEVVEAKAGAGSATLSMAYAAARFVESSLRALDGDQDVYECSYVQSELTELPFFASKIKLGKEGVEGVLPDVLEGLTEYEQKALEALKPELKGSIEKGIAFANKQATAGAAV
Thupl.29377356s0004.2.p		Group Ⅰ	Thuja plicata	422	MASATISMSKVSARGFSPSVSEPRLSGAGIHLRSSVIRIPSKMSSKIFSGLKAGIASESEVNSFNSATNAVLRSSINAIKSAEKRQIIAKAGQASSSAEGFKVAILGAAGGIGQPLSLLIKMFPLVSVLNLYDIANVKGVAADLSHCNSPAQVQDFTGPTELANSLKGVDVVVIPAGVPRKPGMTRDDLFNINAGIVKNLIEAVADNCPNAFIHIISNPVNSTVPIAAEVLKQKGVYDPKKLFGVTTLDVVRANTFVAQKKNLKLASVDVPVVGGHAGITILPLLSKTKPYVTFTQEEVESLTVRIQNAGTEVVEAKAGAGSATLSMAYAAARFVESSLRALDGDQDVYECSYVQSELTELPFFASKIKLGKEGVEGVLPDVLEGLTEYEQKALEALKP…
Thupl.29377356s0004.3.p		Group Ⅰ	Thuja plicata	422	MASATISMSKVSARGFSPSVSEPRLSGAGIHLRSSVIRIPSKMSSKIFSGLKAGIASESEVNSFNSATNAVLRSSINAIKSAEKRQIIAKAGQASSSAEGFKVAILGAAGGIGQPLSLLIKMFPLVSVLNLYDIANVKGVAADLSHCNSPAQVQDFTGPTELANSLKGVDVVVIPAGVPRKPGMTRDDLFNINAGIVKNLIEAVADNCPNAFIHIISNPVNSTVPIAAEVLKQKGVYDPKKLFGVTTLDVVRANTFVAQKKNLKLASVDVPVVGGHAGITILPLLSKTKPYVTFTQEEVESLTVRIQNAGTEVVEAKAGAGSATLSMAYAAARFVESSLRALDGDQDVYECSYVQSELTELPFFASKIKLGKEGVEGVLPDVLEGLTEYEQKALEALKP…
Thupl.29377356s0004.6.p		Group Ⅰ	Thuja plicata	422	MASATISMSKVSARGFSPSVSEPRLSGAGIHLRSSVIRIPSKMSSKIFSGLKAGIASESEVNSFNSATNAVLRSSINAIKSAEKRQIIAKAGQASSSAEGFKVAILGAAGGIGQPLSLLIKMFPLVSVLNLYDIANVKGVAADLSHCNSPAQVQDFTGPTELANSLKGVDVVVIPAGVPRKPGMTRDDLFNINAGIVKNLIEAVADNCPNAFIHIISNPVNSTVPIAAEVLKQKGVYDPKKLFGVTTLDVVRANTFVAQKKNLKLASVDVPVVGGHAGITILPLLSKTKPYVTFTQEEVESLTVRIQNAGTEVVEAKAGAGSATLSMAYAAARFVESSLRALDGDQDVYECSYVQSELTELPFFASKIKLGKEGVEGVLPDVLEGLTEYEQKALEALKP…
Thupl.29377356s0004.4.p		Group Ⅰ	Thuja plicata	415	MSKVSARGFSPSVSEPRLSGAGIHLRSSVIRIPSKMSSKIFSGLKAGIASESEVNSFNSATNAVLRSSINAIKSAEKRQIIAKAGQASSSAEGFKVAILGAAGGIGQPLSLLIKMFPLVSVLNLYDIANVKGVAADLSHCNSPAQVQDFTGPTELANSLKGVDVVVIPAGVPRKPGMTRDDLFNINAGIVKNLIEAVADNCPNAFIHIISNPVNSTVPIAAEVLKQKGVYDPKKLFGVTTLDVVRANTFVAQKKNLKLASVDVPVVGGHAGITILPLLSKTKPYVTFTQEEVESLTVRIQNAGTEVVEAKAGAGSATLSMAYAAARFVESSLRALDGDQDVYECSYVQSELTELPFFASKIKLGKEGVEGVLPDVLEGLTEYEQKALEALKPELKGSIE…
Thupl.29377356s0004.1.p		Group Ⅰ	Thuja plicata	443	MCRGSSIFCSFIILSLVLRNSMASATISMSKVSARGFSPSVSEPRLSGAGIHLRSSVIRIPSKMSSKIFSGLKAGIASESEVNSFNSATNAVLRSSINAIKSAEKRQIIAKAGQASSSAEGFKVAILGAAGGIGQPLSLLIKMFPLVSVLNLYDIANVKGVAADLSHCNSPAQVQDFTGPTELANSLKGVDVVVIPAGVPRKPGMTRDDLFNINAGIVKNLIEAVADNCPNAFIHIISNPVNSTVPIAAEVLKQKGVYDPKKLFGVTTLDVVRANTFVAQKKNLKLASVDVPVVGGHAGITILPLLSKTKPYVTFTQEEVESLTVRIQNAGTEVVEAKAGAGSATLSMAYAAARFVESSLRALDGDQDVYECSYVQSELTELPFFASKIKLGKEGVEGV…
Thupl.29378201s0008.1.p		Group Ⅰ	Thuja plicata	414	MAAATLSMNVVSKTQPQSNARQSHFSVTGLRSHLPAQSLSVRNTIKGFSGLRASNLQTTFFGQEINWAQASFGNSRMGKKRHATGRSVQVRASLFKVAILGAAGGIGQPLSLLIKMSPLVSELNLYDIANVKGVVADLSHCNTPAQVLAYTGTAELGDSLKGVDVVVIPAGVPRKPGMTRDDLFNINAGIVKSLIESVAENCPNAFVHIISNPVNSTVPIAAEVLKQKGVYNPKKLFGVTTLDVVRANTFVARKKNLRLIDVDVPVIGGHAGITILPLLSKTRPSVTFTQDEVEELTLRIQNAGTEVVEAKAGAGSATLSMAYAAARFVESSLRALDGDPDVFDSSYVQSELTELPFFASRVKLGKQGIEGFVVSDVEGLTEYEQKALNALKPELRASI…
Thupl.29381914s0019.1.p		Group Ⅰ	Thuja plicata	338	MGKKRHATGRSVQVRASLFKVAILGAAGGIGQPLSLLIKMSPLVSELNLYDIANVKGVVADLSHCNTPAQVLAFTGTAELGDSLKGVDVVVIPAGVPRKPGMTRDDLFNINAGIVKSLIESVADNCPNAFVHIISNPVNSTVPIAAEVLKQKGVYNPKKLFGVTTLDVVRANTFVARKKNLRLIDVDVPVIGGHAGITILPLLSKTRPLVTFTQDEVEEITLRIQNAGTEVVEAKAGAGSATLSMAYAAARFVESSLRALDGDPDVFDSSYVQSELTELPFFVSRVKLGKQGIEGFLVSDVEGLTEYEQKALNALKPELKASIEKGISFVQKQAATTS
Thupl.29381914s0019.2.p		Group Ⅰ	Thuja plicata	338	MGKKRHATGRSVQVRASLFKVAILGAAGGIGQPLSLLIKMSPLVSELNLYDIANVKGVVADLSHCNTPAQVLAFTGTAELGDSLKGVDVVVIPAGVPRKPGMTRDDLFNINAGIVKSLIESVADNCPNAFVHIISNPVNSTVPIAAEVLKQKGVYNPKKLFGVTTLDVVRANTFVARKKNLRLIDVDVPVIGGHAGITILPLLSKTRPLVTFTQDEVEEITLRIQNAGTEVVEAKAGAGSATLSMAYAAARFVESSLRALDGDPDVFDSSYVQSELTELPFFVSRVKLGKQGIEGFLVSDVEGLTEYEQKALNALKPELKASIEKGISFVQKQAATTS
Thupl.29379925s0004.1.p		Group Ⅲ	Thuja plicata	349	MEKGKRSTSYGDLGIDIAGSFFKSIEGVGPLSPSGRNIKITVVGVGNVGMAIAQTILTQDLTNELVLIDIQAEKLRGEMLDLQHAAAFLPRTKIVADTDYAVSAGSDLCIITAGARQRDGESRLALVERNLHLFKSIVPEIVKYSPNAILLVVSNPVDVLTYITWKLSGFPSNRVIGSGTNLDSSRFRFMIADHLDVNAQDVQAYMIGEHGDSSVALWSSISVGGMPVLSFLDKNQIHYEKHHLEAIHHTVVNSAYEVIKLKGYTSWAIGYSAANLAKSLLRNQRRIHPVSVLAKGFHGIEEEVFLSLPAQLGRGGVLGVVNIHLTEEESHQLNKSARAILDVQQRLSI
Thupl.29377942s0020.1.p		Group Ⅲ	Thuja plicata	483	MSVSATPNSISLLCSNPHQSKLQPKNNRTRCAVLNPNAPLPRSLKHHYPQQSRAQKSIMSVSATGFSTTTISLFCNPHPTQFQSLKHHYPQQNRAQKSINPPIMSVSTTPNSIPLLLSNPRPTQLQPKNNRHRCAVLSPNSPNPSQSLSLNRPDPLTKPIQGTGPPSPVTRTGKITVVGVGNVGMAIAQTILTQDLTDDLALLDIQPDKLRGEMLDLQHAAAFLPRTKIRADTDYAVTAGSDLCIITAGARQRQGESRLDLLHRNLSLFQSIVPQLVQHSPEALLMVVSNPVDILSYITWKLSGLPPNRVLGSGTNLDSSRLRFSIAEQLNVNAQDVQALIVGEHGDSSVALWSTAAVGGVPLLSFLERSQGDSSFPLDVLHQGVIDGAYEVIRLKGYT…
Thupl.29378057s0020.1.p		Group Ⅲ	Thuja plicata	349	MEKSRRGVKSGDLGIDIASSFFKPIQGAGQMNPSGGNAKITVVGVGNVGMAVAQTILTQELTSELALVDVDAERLRGEMLDLQHAAAFLPRTKILAGTDYTVSAGSDICVITAGARQREGESRLSLVDRNVQLFKSIVPQVAKHSPEAILLVVSNPVDILTYVAWKLSGFPSNRVIGSGTNLDSSRFCFMIAEHLDVNAQDVEAYIIGEHGDSSVALWSSISVGGMPVLGFLNKQEIPYEKHHLEAIHRAVVESAYEVIELKGYTCWAIGYSAANLVRSVLRNQRRIHPVSVLAKGFHGIEDEVFLSLPSLIGRRGVVSAVNLHLSEEETQQLRHSAQAILDVQKQLSV
Thupl.29377880s0001.1.p		Group Ⅲ	Thuja plicata	349	MEKGKRSTSYGDLGIDIAGSFFKSIEGVGPISPSARNTKITVVGVGNVGMAVAQTILTQELTNELVLVDIQAEKLRGEMLDLQHAAAFLPRTNIVADTDYAVSAGSDLCIITAGARQRDGESRLALVERNLQLFKSIVPEIVKYSPNAILLVVSNPVDVLTYITWKLSGFPANRVIGSGTNLDSSRFQFMIADHLDVNAQDVQAYMIGEHGDSSVALWSSISVGGMPVLSFLDKNQIPYEKHHLEAIHHTVVNSAYEVIKLKGYTSWAIGYSAANLAKSLLRNQRRIHPVSVLAKGFHGIEEEVFLSLPAQLGRGGVLGVVNIHLTEEESHRLMKSARAILDVQQHLSF
Thupl.29377880s0002.1.p		Group Ⅲ	Thuja plicata	349	MEKGKRSTSYGDLGIDIAGSFFKSIEGVGPISPSARNTKITVVGVGNVGMAVAQTILTQELTNELVLVDIQAEKLRGEMLDLQHAAAFLPRTNIVADTDYAVSAGSDLCIITAGARQRDGESRLALLERNLQLFKSIVPEIVKYSPNAILLVVSNPVDVLTYITWKLSGFPANRVIGSGTNLDSSRFQFMIADHLDVNAQDVQAYMIGEHGDSSVALWSSISVGGMPVLSFLDKNQIPYEKHHLEAIHHTVVNSAYEVIKLKGYTSWAIGYSAANLAKSLLRNQRRIHPVSVLAKGFHGIEEEVFLSLPAQLGRGGVLGVVNIHLTEEESHRLMKSARAILDVQQRLSF
Thupl.29378896s0033.1.p		Group Ⅲ	Thuja plicata	282	MAKNPVRVMVTGAAGQIGYALVPMIARGIMLGADQPVILHMLDIPPAAESLNGVKMELIDAAFPLLKGVVATTDVVEACTGVNIAVMVGGFPRKEGMERKDVMSKNVSIYKSQASALEQHAAPDCKVLVVANPANTNALILKEFAPSIPEKNITCLTRLDHNRALGQVSERLKVPVSNVKNVIIWGNHSSSQYPDVNHAVVETTAGEKPVRQLVADDAWLNGEFVTTVQQRGAAIIKARKLSSALSAASAACDHIRDWVLGTPKVATPENVNLYYHKLIIFV
Thupl.29380163s0002.1.p		Group Ⅲ	Thuja plicata	286	MEKNPVRVLVTGVPMIVRGIMLGVDQPVILHMLDIPPAGKFMNGVKMELIDAAFPLLKGLFAATDVVDACTGVNIAFMVGGFPRKEGMEMKDVISRLQVLVVANPANTNALILKEFAPSIPEKNITCLTRLDHTRVVGQVSERLKVPISNVKNVIILGNHSSSQYPDVNHAVLETAAGEKLVRQLLVDDAWLNGEFITTVQHVLSAASDACGHICDWVLGTPKGTWVSMGAYSDGSYDVPSGVIFSYPVTCENGKWSIVQGLRINKFSRKKLDATANELDEEKDLA
Thupl.29378896s0033.2.p		Group Ⅲ	Thuja plicata	219	MAKNPVRVMVTGAAGQIGYALVPMIARGIMLGADQPVILHMLDIPPAAESLNGVKMELIDAAFPLLKGVVATTDVVEACTGVNIAVMVGGFPRKEGMERKDVMSKNVSIYKSQASALEQHAAPDCKVLVVANPANTNALILKEFAPSIPEKNITCLTRLDHNRALGQVSERLKVPVSNVKNVIIWGNHSSSQYPDVNHAVVETTAGEKPVRQLVADDAG
AALBA5B910994P1		Group Ⅰ	Abies alba	771	MGVTALDVVTANTFVAEVVGVDPKEIVFPVVGGHAGITILLLLSQVNPSFSFTKEEVEFLTNRIQNGGTEVVEAKAGTGSATLSMAFAAAKFVDACLHGLRGDAGVVQCAFVASEVTELPFFASKVRLSCAGGSENNLLINLFPDDTGIELPHQIAKLSTCVNFAYDEKRAQRPFKWVHHLAGINFFPEAPPFLTDNMSGNNDVAKGASTLAGLNIYRQQHRVQTILKQIRARKKSQLALKEQTDSLANLRLPPLTFRNVPWAMYSSKCSLHSWSPVEVGHNQISVTYVASEELGIVRTQCEGVAKCCPNAIVNIISNPVNSTVPIAAEVFKRAGVYNPKHLMGVTALDVVTANTFVAEVVGVDPKEIVVPVVGGHAGITILPLLSQVNPSFSFTKEEV…
AALBA5B312396P1		Group Ⅰ	Abies alba	355	MQCSEHTTSFRIARISAHLRPPHREYGGILSRGDCRAKGGAPGFKVAILGASGGIGQPLSMLMKMNPLVSVLHLYDVVNTPGVTADLSHMDTTAVVRGFLGKEQLESALVGMDLVIIPAGIPRKPGMSRDDLFKINAGIVQSLCEGVAKYCPQAIVNIISNPVNSTVAIAAEVFKRAGVYNPKLLMGVTTLDVARANTFVAEVLGVDPKMVDVPVVGGHAGVTILPLLSQVQPSYSFTNQEVEYLTNRIQNGGTEVVEAKSGTGSATLSMAYAAVKYADACLRGLHGDAGVIECAFVASEVTELPFFASKVQLGRGGIELVFPLGPLNQYERAGLEQAKQELKASIEKGISFVRK
AALBA5B342652P1		Group Ⅲ	Abies alba	345	MRLSSANLIFFPRMFSSHDSDNGICYAGQIGYALVPMIARGIMLGPDQPVILHMLDIPPAAEALNGVKMELIDAAFPLLKGIVATTDPVEACSGVNIAVMVGGFPRKEGMERKDVMSKNVSIYKSQASALEQHAAPNCKVLVVANPANTNALILKEFAPSIPEKNVTCLTRLDHNRALGQISERLGVPVSDVKNVIIWGNHSSSQYPDVYHATVVTGAGEKPVRQLVADDAWLDGEFITTVQQRGAAIIKARKLSSALSAASSACDHIRDWVLGTPKGTWVSMGVYSDGSYDVPPGIIYSYPVTCENGSWSIVQGLPINGFSRKKLDATANELVEEKALAYSCLN
AALBA5B1085036P1		Group Ⅰ	Abies alba	418	MASATLSMSSVSVSGFLAPVCETRPSGAGLQASAVSFPTKKVFKTFSGLKAGVACESEASFFSHETNAVLWSSVSRPRAAEKQQIVQKAGQIRASTFKVAILGAAGGIGQPLSLLIKMSPLISGLHLYDIANVRGVSADLSHCNTPAQILDFTGPAELANSLKGVDVVVIPAGVPRKPGMTRDDLFNINAGIVRTLVEAVADNCPNAFIQIISNPVNSTVPIAAEVLKQKGVYDPKKLFGVTTLDVVRANTFVAQKKNLRLIDVDVPVVGGHAGITILPLLSKTKPSVTFTQEEIEELTVRIQNAGTEVVEAKAGAGSATLSMAYAAARFVESSLRALDGDPDVFECSYIQSELTELPFFASRIKLGKKGVEAVIASDLEGLTEYEQKALEALKPELKA…
AALBA5B920918P1		Group Ⅰ	Abies alba	423	MASATLSMSSVSVSGSLAPICETRPSGAGLQASAVRFAPKKVFKTFSGLKAGVACESESSFFGHETNALLWSSVIRARSAENQQIVQRAGQVRASTFKVAILGAAGGIGQPLSLLIKMSPLISGLHLYDIANVKGVAADLSHCNTPAQILDFTGPAELANSLKGVDVVVIPAGVPRKPGISPIGMTRDDLFNINAGIVRTLVEAVADNCPNAFISIISNPVNSIVPIAAEVLKQKGVYDPKKLFGVTTLDVVRANTFVAQKKNLRLIDVDVPVVGGHAGITILPLLSKTKPSVTFRQEEIEELTVRIQNAGTEVVEAKAGAGSATLSMAYAAARFVESSLRALDGDPDVFECSYIQSELTELPFFASRIKLGKQGVEAVITSDLEGLTEYEQKSLEALK…
AALBA5B122936P1		Group Ⅰ	Abies alba	418	MASATLSMSSVSVSGSLAPICETRPSGAGLQASAIRFAPKKVFKTFSGLKAGVACESESSFFSHETNAVLWSSVIRARSAENQQIVQRAGQVWASTFKVAILGAAGGIGQPLSLLIKMSPLISGLHLYDIANVKGVAADLSHCNTPAQILDFTGPAELANSLKGVDVVVIPAGVPRKPGMTRDDLFNINAGIVRTLVEAVADNCPNAFISIISNPVNSTVPIAAEVLKQKGVYDPKKLFGVTTLDVVRANTFVAQKKNLRLIDVDVPVVGGHAGITILPLLSKTKPSVTFTQEEIEELTVRIQNAGTEVVEAKAGAGSATLSMAYAAARFVESSLRALDGDPDVFECSYIQSELTELPFFASRIKLGKQGVEAVITSDLEGLTEYEQKSLEALKPELKA…
AALBA5B115615P1		Group Ⅰ	Abies alba	348	MTRDDLFNINAGIVRTLCEGVAKCFPNAIVNIISNLVNSTVPIAAEVFKRAGVYNPKHLMGVTALDVVRENTFVAEVVGVDPKEIDVPVVGGHAGITILPLLSQVNPSFSFTKEEVEFLTNRIQNGGTEVVEAKDGIGSTTLSMAFATAKFADVCLHGLRGDAGVVQCAFVASEVTELPFFASKVRLGHAGIEEILPLGPLNVYERSGLEKLRKELCKQQEELEQQFKSRNERKEITDQSLKAYETASNTAAIDLPPTHPIRLGLALNFSVFYYEIQNSPKRVCHLTKEAFDEAIAELDTLSEESYKDSILIMQLLRDNLTLWTSDLQEDGGKDQPKGEEAKLEDGEP
AALBA5B149602P1		Group Ⅰ	Abies alba	217	IVRTLCEGVAKCYPNAIVNIISNPVNSTVPIAAEVFKRVGVYNPKRLMGVTALDVVRANTFVAEVVGVDPKEIDVPVVSGHARITILPLLSQVNPSISFTKEEVEFLTNNIQNGGTKVVEAKAGTGSVTLSMAFATAKFADACLHGLRGDAGVVQCAFVASEVTELPFFASKVRTGRAGIEEIFPLGPLNAYERSGLEKLKKELLASIDQGISSVRQ
AALBA5B963942P1		Group Ⅰ	Abies alba	225	MPAVSGSAKRVGTNKGIAKCCPNAIVNIISNPVNSTVPIVAEVFKRAGVYNPKRLMGATTLDVVRANTFVAEVVGVDPKEIDVPVVGGHARIIILPLLSQVNPSFSFTKEEVEFLRNHIQNGGTEVVEAKSGTVFATLSMAFATAKFVDVCLHGFRGDVGVVQCAFVASEVTELPFFASKVRMGRAGIEEIFPLGPLNAYERSGLEKLKKELLASIDKGISSVRQ
AALBA5B660486P1		Group Ⅰ	Abies alba	317	MLSQKTDVACELKGEGCIQEGVAKCCPNAIVNIISNPVNSTVPITAEVFKRAGVYNPKRLMGVIALDVVTTNTFVAEVVGVDPKEIVVPVVGRHAGITILPLLSPVNPSFSFTKEEVEFLTNRIQNGGTEVVEAKAGTSSATLSMAFAAAKFDDACLHGLRGDAGVVQCAFVASEVTELPFFASKVRLGHAGIEEIFPLGPLNVYERSGLEKLRKELCKQREELEQHQKNLLQGGSENNLLINLFPDDTGIELPHQIAKLSIGVNFAYDEKRAQRPFKWVQHLAGIDFLPEAPPFLIDNMSGNNDVAKGASTLAELF
AALBA5B801570P1		Group Ⅰ	Abies alba	356	MEKQVQNHSIAHSSSTSSLGRIDMTGAFFKSIHNAAPPSPSTRNTKITVVGVGNVGMAVAQTILTQELTTELALVDVQADKLRGEMLDLQHAAAFLPRTKIVADTDYAVTAGSDICVITAGARQREGESRLDLVGRNFHLFKSIVPQLVKYSPDTILLVVSNPVDILTYIAWKLSGLPSNKVMGSGTNLDSSRFRFMIADHLDVNAQDVQAYIIGEHGDSSVALWSSISVGGVPVLSFLDKQEIPYEKEHLEAIHQAVVNSAYEVIKLKGYTSWAIGYSTASLVKSVLRNQRRIHPVSVMAKDFHGIEEEVFLSLPAQLGRGGILGVASIHLTEEETNRLKMSAEAIFEVQKQLHI
AALBA5B677358P1		Group Ⅲ	Abies alba	352	MEKNSIAHSSSTSSLGHIDMTGAFFKSIHSAAPLSPSTRNTKITVVGVGNVGLAVAQTILTQELTTELALVDIQADKLRGEMLDLQHAAAFLPRTRIVASTDYAVTAGSDICVITAGARQQDGESRLDLVGRNLHLFKSIVPQLVKYSPDTILLVVSNPVDILTYIAWKLSGLPSNKVMGSGTNLDSSRFRFMIADHLDVNAQDVQAYIIGEHGDSSVALWSSISVGGVPVLSFLDKQEIPYEKEHLEAIHQAVVNSAYEVIKLKGYTSWAIGYSTANLVKSVIRNQRRIHPVSVMAKNFHGITQEVFLSLPAQLGRGGILGVASIHLTEEETDRLKMSAEAIFEVQRHLHI
AALBA5B551198P1		Group Ⅲ	Abies alba	419	MPVFTGLDNCFCSSSGSPAECIPGISFPPSPLQTQLLCNKFSLRQWARLRPRHPKALRIAAASSASSKPTTPETTSKPRATLGVEIADVFFKRTQSTHTSSHTRTGTKVTVVGVGNVGMAIAQTILTQELTMELALVDIQADKLRGEMLDLQHAAAFLPHTKIVADTDYSVTAGSDICVITAGARQRDGESRLDLVGRNLHLFRSIVPQLVKHSPDTVLLVVSNPVDILTYIAWKLSGLPSNRVLGSGTNLDSSRFRFLIADHLDVNAQDVQAYIVGEHGDSSVALWSSISIGGVPVLSLLEKHQIPYEKETLENIHRAVINSAYEVIRLKGYTSWAIGYSAASLVKSIVRNQKRIHPISMLAKGFHGIEDDVFLSLPTQLGTGGILGIANIPLTGEET…
AALBA5B631412P1		Group Ⅰ	Abies alba	204	MTRDDLFNINVGIVRNLVEVVANNYPNAFISIISNPINSTIPIVVEVLKQKGVFDPKKFFGVTTLDFVRENTFVAQKKNLRLIDVDVPVVGGHTGITILSLLSKTKPYVTFTPEEIEDLTVRIQNVGKEVVEAKAGDGSATLSMAYASARFVESSLRALDGDLDVFECSYIQSELVELHVFASRIKLWKQGVEAVITSDLEGLA
AALBA5B510169P1		Group Ⅰ	Abies alba	179	MLCLLKSSRVSGEGRIQEGVAKCCPNVIVNIISNPVNSTVPIAAEVFKRAGVYNPKRLMEVTTLDVVRANTFVAEVVGVDPKEIDVPVVGGHAGITILPLLSQVNPSFYFTKEEVEFLTNHIQNGGTEVVEAKAGTEVTELPFFASKVRLGRAGIEEIFPLGPLNAYERSGLKKLRKEL
AALBA5B333332P1		Group Ⅰ	Abies alba	206	MNVGIVRTLVEVVADNYPNAFISIISNPANSTVPIATEVLKQKGVFDPKKLFCVTTLDVVRENTFVAQKKDLKLIDVDVPVVGGHAGIIVLSLLSKTNPSITFMQEDIEELIVRIQNVGTEVVEEKEGARSANLSMAYVVARFVESSLRALDGDLNGFECSYIQFELTKLPFFASRIKLGKQDIEVVITLYLEGLTEYEQNSLEVD
AALBA5B325739P1		Group Ⅰ	Abies alba	318	MLCLLKSSRVSGEGRIQEGVAKCCPNAIVNIISNPVNSTVPIAAEVFKRAGVYNPKRLMEVTSLDVVIANTFVAEVVGVDPKEIDVLVVGGHAGITIIPLLSQVNPSFYFTKEEVEFLTNCIQNGGTEVVEAKAGTEVTELPFFDSKVRLGHAGIEEIFPLGPLNAYERSGLEKLRKELCKQREESEQRKKNLQEIIANRKKFISSLPSHLKVLKKASLPVQQQLGILHTKRTKQEQLAELLPAPLYILYSQLLAQKEAFEEPIDLEIVGSTKDAQSFTRQQTNKDTGASTGIEESKLDDDVLEEEDGSLKEELESMR
AALBA5B865498P1		Group Ⅱ	Abies alba	269	MSSAMRRLVGSALKNASSVSVNTNGTMRRFYSSGGSPPPRKVVVLGAAGGIGQPLALLMKLNPMVSQLALYDIAGTPGVAADVGHINSRAEVAGYMGEDQLGTALENADVVIIPAGVPRKPGMTRDDLFNINAGIVKSLCSAIAKYCPEAVVNMISNPVNSTVPIAAEIFKKAGTYNEKKLFGVTTLDVVRAKTFYAAKAGVPVEEVNVPVVGGHAGITILPLFSQATPKPNSILSEEDIKALTKRTQDGGTEVVEAKAGKGSATLSMA
AALBA5B738119P1		Group Ⅰ	Abies alba	498	MTRDDLFNINAGIVRTLCEGVAKCCPNEIVNIISNPVNSTVPIAAEVFKRASVYNPKCLMGVTALDVVRANTFMAEVVGVDPKEIDVPVVVGHARITILPLLSKVNPSFSFTKEEVEFLTNRIQNGGTEVVEAKAGTEVTELPFFTSKVRLGRAGIEEIFPLGPLNVYERSGLEKLRKELCKQREELEQRKKNLQETIANHKKFISSLPSHLKALKKASLPMQQQLGILHTKRTKQQQLAELLLAPLYILYSQLLAQKEAFEEPIDLEIVGSTKDAQSFSRQQATKIQVLLQALKKANWMMMCLKKRMIPRDEEKGLKGVNFAYDEKRAQRPFKWVQHLAGIDFLPEAPPFLTDNMSGNNDAAKVEVGHNQISVTFVASEEPGTDISLVLDGEGGSLKA…
AALBA5B547387P1		Group Ⅰ	Abies alba	396	MTRDDLFNINAGIVRTLYEGVANCCPNAIVNIISNPVNSTVPIAAEVFKRAGVYNPKRLMGVIALDVVRENTFVAEVLGVDPKEIDVPVVGGHAGITIIPLLSQVNPSFSFTKEECAFVASEITKLPFFASKVRLGHAGIEEIFPLGPLNVYERSGLEKLRKELCKQREELEQRKKNLQETIANHTGASTGIEEGKLDDDVQIKENVDGTGFYQVHPLFVTIHVYDDELTNGIKPSKLVMMKFEYLVKLHVVCVGVDSLQGGSENNLLINLFPDDTGIELPHQIAKLSTCVNFAYDEKRAQRLFKWVQHLAGIDFLPEAPPFLTDNMSGNNDAAKGASTLAGLNIYRQQHRVQIILEGIRARKKSQLALKEQIDLLANLRLPPLTFRNVQLKMQFA
AALBA5B150170P1		Group Ⅲ	Abies alba	303	MTRDDLFNINAGIVRTLCEGIAKCCPNVIVNIISNPVNSTVPIAAEVVEAKAGTGSATLSMAFATAKFVDVCLHGLRGDVGVVQCAFVALEVTELPFFASKVRLGRVGIEENFPLGPLNVYERSGLEKLRKELYKVEDELCRICNDILSIIDDHLLPSSTLGESTVFYYKMKGDFYRYLAEFKSGNERKEITDQSLKAYETASNTAAIDLPPTHPIRLGLALNFSVFYYEIQNSPERVCHLTKEAFDEATAELDTLSEESYKDSILIMQLLRDNLTLWTSDLQEDGGKDQPKGEEAKLEDGEP
AALBA5B794199P1		Group Ⅰ	Abies alba	137	MTRDDLFNINAGIVRNLVEAVADNCPNAFISIASNPVNSTVPIVAEEKIEELIVRIHNVGTEVVEAKAGARYATLSMAYVDFRFVESSLRALDGDPDVFKCSYIQSEQTKLPFFASRIKLGKQGIEAVITSNLEGLT
AALBA5B005902P1		Group Ⅰ	Abies alba	420	MTQDDLFNINVGIVRTLVEVVADNCPNAFISIISNPINSTVPIVFEVLKQKGVFDPINLVGVTTLDVLSANTVAAQKKNLKLIDVDVHVVGGHVGITILPLLSKTKHYVPFMQEEIEELIVRIQNARTEVLEVIINPSKKRAEVKGVARVHYAAHELMGVVCHHFAVPARKVSQQRSFTRKYCGNCVESYSCRMSGEEAKRGGHKGGDILHLEPTGMTMIKSNPGNWLREGRPWGTFLENLGYVPIPPVPLKGKVTSPSRNRRFGNLTKRPRGDIVVRAPTATETPMEVHVPAKRNESLKIPSKGGKDASAEHEESLIGVAERRRKGKGKVKGFKVKVVDTSPTGGPEPMEVIKGEKAPVGNFAQITELEKKVQAKRDKYQRILAEDRKYRGSLCKDMY…
AALBA5B835719P1		Group Ⅰ	Abies alba	165	MDNRTGARISRIAAHLAHPGHYQLQNEGILERIDCRSKGEATGFKVAVLGASGGIGQPLSLLMKINPLVSVLHLYDVVNTPGVTADISHMDTTAVQSSQSTVPIAAEVFKRAGVYNPKLLMGVTALDVVRANTFVAEVVGVDPKEIDVPVVGGHAGITILPLLSQ
AALBA5B778661P1		Group Ⅱ	Abies alba	202	MRRFYSSGGSPPPRKVIVLGGIGQPLALLMKLNPMVSQLALYDIAGTPGVAADVGHVNSRAEVAVYMGEDQLGTTLENADVVIIPAGVPRKPGMTCDDLFNINAGIVKSLCSAIAKHCPEAVVNMISNPVNSTVPIAAEIFKKAGTYNEKKLFGVTTLDVVRAKTFYAAKEGVPVEEVNVPIVGGHAGITILPFFFAGNTKT
AALBA5B730497P1		Group Ⅱ	Abies alba	399	MDAYYTNSLIDLFDISLETVALWFTSVICTVYIDDYTIGKEIVDLCLDRIQKLADNFTGLQGFLVFNGVGGGTGHWMKLSPQQNLRAGEKALVARTLLKILLKFCPFIRPVVEDLQRLNVAPKLVALQHLFSATGCVVNSTYLLFSAFLVFSMQLGFAMLCVGSVRAAFSTISSDNLSMPLKNASSVSVNTNGTMRRFYSSGGSPPPRKVVVLGAAGGIGQPLALLMKLNPMVSKLALYDIAGTPGVATDVGHVNSRAEVAGYMGEDQLGTALENADVVIIPASVPRKPGMTRDDLFNINAGIVKSLCSAIAKYCPEAVVNMISNPINSIVPIAAEIFKKVGTYNEKKLFGVTTLDVVRAKTFYAAKAGVPIEEVNVPVVGGHAGITILPLFFAGNTKT
AALBA5B778661P2		Group Ⅱ	Abies alba	187	MRRFYSSGGSPPPRKVIVLGGIGQPLALLMKLNPMVSQLALYDIAGTPGVAADVGHVNSRAEVAVYMGEDQLGTTLENADVVIIPAGVPRKPGMTCDDLFNINAGIVKSLCSAIAKHCPEAVVNMISNPVNSTVPIAAEIFKKAGTYNEKKLFGVTTLDVVRAKTFYAAKEGVPVEEVNVPIVGGHA
Ginchr6.1867.p		Group Ⅲ	Ginkgo biloba	471	MEHPFRSAMGLDPMALITFSKASSNTLTLDISSSGSSQLLDRTNISSFNLSSSFIPQKPAKFTVTFNTQKYFVPTKVVCSVTPSSQTQTPTTAPLSSTTTENKPECFGVFCLTYDLNKEEKPKSWKKLIKVAVSGAAGMISNHLLFKIASGEVFGQDQPISLNLLGSERSFSALEGVAMELEDSLYPLLRAVSIGVDPYDVFRDAEWALLIGAKPRGPGMERADLLDINGKIFAGQGKALNAVASPNVKVIVVGNPCNTNALICLKNAPNIPAKNFHALTRLDENRAKCQLALKAGVFYDNVSNMTIWGNHSTTQVPDFLNARINGLPVKEVITDIKWLEEEFTEKVQKRGGVLIKKWGRSSAASTAVSVVDAIKSLIIPTPEGDWFSSGVYTTGNPYG…
Ginchr1.1706.p		Group Ⅰ	Ginkgo biloba	354	MDQRSSARFAQISAHLRPLQSEMEDGGILGHHSCRSKGGASGFKVAILGASGGIGQPLSMLMKMNPTVSVLHLYDVANTPGVTADISHMDTSAVVRGFMGKEQLEDALGGMDLVIIPAGVPRKPGMTRDDLFNINAGIVQTLCEGVAKCCPNALVNIISNPVNSTVPIAAEVFKKAGVYNPRRLMGVTTLDVLRANTFVAEVIGVDPKDVDVPVVGGHAGITILPLLSQVKPSFSFSKEEVEYLTNRIQNGGTEVVEAKAGTGSATLSMAYAAAKFGDACLRGLRGDSGVVLCAFVTSEVTELPFFASKVRLGRAGVEEVFPIGPLSAYERDGLEKLKMELRSSIDKGISFVRK
Ginchr1.3093.p		Group Ⅱ	Ginkgo biloba	349	MSSVMRRTIGSALRSASSVSDGARRFYSSGSSPPRKVAVLGAAGGIGQPLALLMKLNPLVSQLSLYDIAGTPGVAADVSHVNTRAEVAGYMGDEQLGKALEGADVVIIPAGVPRKPGMTRDDLFNINAGIVKSLCSAIAKYCPEALVNMISNPVNSTVPIAAEIFKKAGTYNEKKLFGVTTLDVVRAKTFYAAKAGVPVEEVDIPVVGGHAGITILPLFSQASPKPNSTLSEEDIKALTKRTQDGGTEVVEAKAGKGSATLSMAYAGAVFANSCLKGLNGEQNVMECSYVQSNVTELPFFASKVRLGKHGLEDILGLGSLSEFEQQGLELLKPELKASIEKGIKFASEN
Ginchr1.675.p		Group Ⅰ	Ginkgo biloba	355	MQASEQTSSFRIARISAHLRPPQREDGGILSRGNCRAKGGAPGFKVAILGASGGIGQPLSMLMKMNPLVSVLHLYDVANTPGVTADISHMDTTAVVRGFLGKEQLEAALAGMDLVIIPAGVPRKPGMTRDDLFNINAGIVRTLCEGVAKCCPHAVVNIISNPVNSTVPIAAEVFKKAGVYDPKRLMGVTTLDVVRANTFVAEVLGIDPKEVDVPVVGGHAGVTILPLLSQVQPSFSFSRQEAEYLTNRIQNGGTEVVEAKAGTGSATLSMAFAAAKFADASLRGLHGDAGVIECAFVASEVTELPFFASKVRLGRAGVEDIFPLGPLNEYERAGLEKAKRELSASIEKGISFIRK
Ginchr4.1712.p		Group Ⅰ	Ginkgo biloba	417	MAAATLSINSVTASGLVAAVSETRAVSQSQASTVRFPTKKSFKSFSGLKAAVACDSEASFFSRETNAALQASFSRLKFSENRQISDNAGQARAATFKVAVLGAAGGIGQPLSLLIKMSPLVSGLHLYDIANVKGVAADLSHCNTPAQVLDFTGPAELANSLKGVDVVVIPAGVPRKPGMTRDDLFNINAGIVKNLVEAVAENCPNAFIHIISNPVNSTVPIAAEVLKQKGVYDPKRVFGVTTLDVVRANTFVAQKKNLRLIDVDVPVVGGHAGITILPLLSKTKPSVTFTQEEIEELTVRIQNAGTEVVEAKAGAGSATLSMAYAAARFVESSLRALDGDQDVYECCYVQSELTELPFFASRVKLGKKGLEAVVAADLEGLTEYEQKALEALKPELKAS…
Ginchr2.1449.p		Group Ⅰ	Ginkgo biloba	414	MAAAPFSNSTSGLQSCVSQICLSSPTSNVSAVRIPVKNAFKGFTGLKAGVFSEPQPSFFSQESSEALCASLSNSSLGEKRLVTEKPGQARASTFKVAVLGAAGGIGQPLSLLIKMSPLVSGLHLYDIANVRGVIADLSHCNTPAQVFGFTGSTELADSLKGVDVVVIPAGVPRKPGMTRDDLFNTNANIVKTLIEATAENCPNAFIHIITNPVNSTVPIAAEVLKQKGAYNPKKLFGVTTLDVVRANTFVAQKKNLRLIDVDVPVIGGHAGITILPLLSKTNPSVTFSQQEIEELTVKIQNAGTEVVEAKAGAGSATLSMAYAAARFVESSLRALDGDPDVFECCYVQSELTELPFFASRVKLGKQGIEAVITSDLEGLTDYEQKAFEALKPELKASIE…
Ginchr5.134.p		Group Ⅲ	Ginkgo biloba	351	MCLQQFKMKTLLFAQSSWLELQSRYDTSKGNQSKPSVLKGDRGLGQIGYALVPMIARGVMLGPDQPVILHMLDIPPAAEALNGVKMELIDAAFPLLKGVVATTDAVEACTGVSIAVMVGGFPRKEGMERKDVMSKNVSIYKSQASALERHAAANCKVLVVANPANTNALILKEFAPSIPEKNVTCLTRLDHNRALGQISERLEVPVSDVKNAIIWGNHSSTQYPDVNHAVVVTKEGEKPVRELVADDAWLDGEFITTVQQRGAAIIKARKLSSALSAASAACDHIRDWVLGTPKGTWVSMGVYSDGSYDVPPGLIYSYPVTCENGNWSIVQGLFVAKSPFMVESVDIDLSQ
Ginchr12.1351.p		Group Ⅲ	Ginkgo biloba	410	MASSAATADKWFSSSCLAHHHLSNESFQLQSHSNFEPKHQFSGPGTVCRTYPNIIRASEKSSAMAKAYKAPTPLSLEIAEAFFEPIQSAGPPSPTRRNSKITVVGVGNVGMAIAQTILTQELTNELSLVDVQADKLRGEMLDLQHAAAFLPRTKIVADTDYSVTAGSDICVITAGARQREGESRLALVERNLHLFKSIVPQLVKYSPDTILLVVSNPVDILTYIAWKLSGFPSNKVLGSGTNLDSSRFRFMIADHLDVNAQDVQAYIIGEHGDSSVALWSSISVGGVPVLSFLDKQEIPYEKETLENIHQAVINSAYEVIKLKGYTSWAIGYSAASLVKSVLRNQRRIHPVSVLAKGFHGIEEEVFLSLPAQLGRGGVVSVARIPLTEEETHRLQMSAK…
Ginchr12.1350.p		Group Ⅲ	Ginkgo biloba	347	MAAPSRVAPSLGIDIAQAFFKPIHNAGPPSPTQRNSKVTVVGVGNVGMAIAQTILTQELTNELILVDVQADKLRGEMLDLQHAAAFLPRTKIVADTDYAVTAGSDVCVITAGARQREGESRLALVERNLHLFKSIVPQLAKHSPDAILLVVSNPVDILTYIAWKLSGFPSNKVLGSGTNLDSSRFRFMIADHLDVNAQDVQAYIIGEHGDSSVALWSSISIGGVPVLSFLDKQEIPYEKETLENIHQAVINSAYEVIKLKGYTSWAIGYSAANLVKSFLRNQRRIHPVSVLAKGFHGIEEEVFLSLPAQLGRGGVLGIASIHLSDEETHRLKMSAKAILDVQSELGI
Ginchr11.317.p		Group Ⅱ	Ginkgo biloba	262	MVIYILLGNWEMSSTQIVLTWVLRQCTAEESFFSQWLVLSPITSAVKMVKSMEGAEKRKVVVQGTAGGIGQPLALLMKLNPLEQTGKALEGTDVVIIPTGLPPKPGMTRDDFFNINVGIVKSLCRVIAKYCPEALVNIINNPINSSVPIVAEVSKKAENYGEKKLFGITTLDVVRAKTFYAAKARVPVEEFDILVVGRHARLDHRLNTSCSHLKSCQIPACQCAPSSLLQSTVRAEDLSPDAPELAAAARAVASHETQTSKK
TnS000826455t01		Group Ⅲ	Gmm final	448	MAATANIGCSGAYQLLQRISLPTDLESSTAVTCSRSKLLCHAKSKRNQRVLRIVRAAVQSKTDTASPAPATSVVTPGGKKVDCFGVFCLTYDLKEEEKPKSWKKLVKIAVSGAAGMIANHLLFKLASGEVFGQDQPIALQLLGSERSFTALEGVAMELEDSLYPLLREVSIGIDPYEVFRDVEWALLIGAKPRGPGMERADLLDINGKIYAEQGKALNAVASPNVKVIVIGNPCNTNALICLKNASNIPAKNFHALTRLDENRAKCQLALKAGVFYDNVSNMTIWGNHSTTQVPDFLNAKIHGIPVKEVITDTKWLEEEFTEKVQKRGGDLIKKWGRSSAASTAVSIADAMKSLIIPTPKGDWFSSGVYSTGNPYGIADDFVFSMPCRSKGDGDYELVP…
TnS000179673t04		Group Ⅲ	Gmm final	332	MAKDPVRVLVTGAAGQIGYALVPMIARGIMLGPDQPVILHMLDIPPAAEALNGVKMELVDAAFPLLKGVVATTNVVEACSGVSIAVMVGGFPRKEGMERKDVMSKNVSIYKAQASALEQHAAPNCKVLVVANPANTNALILKEFAPSIPEKNVTCLTRLDHNRALGQISERLNVPVSNVKNVIIWGNHSSTQYPDVNHAKVVTATGEKPVRQLVADDAWLNGEFITTVQQRGAAIIKARKLSSALSAASAACDHIRDWVLGTPEGTWVSMGVYSDGSYDVPQGIIYSYPVTCKNGEWSIVKGLSIDEFSRNKLNATANELVEEKALAYSCLS
TnS000008643t07		Group Ⅱ	Gmm final	345	MRPAMQRLGSVLRRASNNARFYSSGLNPPERKVAVLGAAGGIGQPLALLMKTNPLVSQLALYDIAGTPGVAADVSHVNSRAQVAGYVGEEQLGAALEKADVVVIPAGVPRKPGMTRDDLFNINAGIVKSLCTAIAKYCPEAVVNMISNPVNSTVPIAAEVFKKLGTYDEKKLFGVTTLDVVRAKTFYAGKAGVPVGEVDVPVVGGHAGITILPLFSQATPKPKTPLSDEDIKALTKRTQDGGTEVVEAKAGKGSATLSMAYAGALFASSVLKALNGEPNIVECTYVQSNVTELPFFASKVRLGKNGIDEILGLGPLSDFEKQGLEALKAELKASIEKGIKFANRN
TnS000219571t02		Group Ⅰ	Gmm final	357	MDMHSTPRARIARIAAHLARPQKKNLNDGKALEKMECRSKGGAGGFKVAVLGAAGGIGQPLSLLLKMNPLISVLHLYDVVNTPGVCADISHMDTSAVVRGFLGKEKLDEALVGMDLVIIPAGVPRKPGMTRDDLFNINAGIVKTLCEGIARCCPNAILNIISNPVNSTVPIAAEVLKKAGVYNPKRLMGVTTLDVVRANTFVAEVVGLEPKQIDVPVVGGHAGVTILPLLSQVNPSISFSEEEVEYLTNRIQNGGTEVVEAKAGTGSATLSMAYAAAKFADACLRALRGDAGIVECAFVASEVTELPFFASKVRLGRGGIEEIFPLGPINKYERSGLEKLKNELRASIGKGLSFMQK
TnS000774057t06		Group Ⅰ	Gmm final	371	MAAATFSVTSASSCKSIPRAVNDFVCEPKRSLKAFCDGNARVSYEKKGHFSESLTGAYRSRSTVIGQASPNPGFSKLDTFKVSILGAAGGIGQPLSLLVKMSPLVSALNLYDIANVKGVAADLSHYVVVIPAGVARKPGMTRDDLFNINAGIVKSLVEAVADNCPNAFIHIISNPVNSTVPIAAEVLKQKGVYDPKKLFGVTTLDVVRSNTFVAQKKNLRLIDVDVPVVGGHAGITILPLLSKTRPSVTFSQEEIEELTPRIQNAGTEVVEAKAGAGSATLSMAYAAARFVESSLRALDGDADVYECSYVQSDLIPELPFFASRVKLGKKGVEGFVDSDLEGLSEYEHKALEALKPELKASIEKGIAFANK
TnS000943209t08		Group Ⅰ	Gmm final	492	MYFFDSRHCSTSLTINLHMPDSRAFAAFMLLCSCLIICLIFCCSFTDCFVGFLFLVILRHCFLRSAEIAVFHIMKNEHNTMSSAAAFSTTSAPMGRLLTQPANDSAYQQRFGGSSSSIGFSTRKSSRTFSAGIQLSCETKSHVSDGLRVSHSPRSSVIRKASQNGGAAKSDTYNVAILGAAGGIGQPLAMLVKMSPLVSVLNLYDIANVKGVAADLSHCNTPSLVQGFTGPEELPNSLKNVDVVVIPAGVARKPGMTRDDLFNINAGIVKTLVEAVADNCPNAFIHIISNPVNSTVPIAAEVLKQKGVYDPKKLFGVTTLDVVRANTFVAQKKNFRLIDVDVPVVGGHAGITILPLLSKTMPSVTFTQEEIEQLTPRIQNAGTEVVEAKAGAGSATLSM…
MA_87937g0010		Group Ⅰ	Picea abies	355	MQCSEQTTSFRIARISAHLRPPQREDGGILSRGNCRAKGGAPGFKVAILGASGGIGQPLSMLMKMNPLVSVLHLYDVANTPGVTADLSHMDTTAVVRGFLGKEQLESALVGMDLVIIPAGVPRKPGMTRDDLFKINAGIVQSLCEGVAKFCPRAIVNIISNPVNSTVAIAAEVFKRAGVYNPKLLIGVTTLDVARANTFVAEVLGVDPKAVNVPVVGGHAGVTILPLLSQVQPSCYFTKQEVEYLTNRIQNGGTEVVEAKAGAGSATLSMAYAAVKYADACLRGLRGDADVIECAFVASEVTELPFFATKVQLGRGGIEVVFPLGPLNEYERAGLEQAKKELKASIEKGISFVRN
MA_10431776g0020		Group Ⅰ	Picea abies	291	MNPLVSVLHLYDVVNTPGVTADISHMDTTAVVRGFVGKEQLEAALVGMDLVIIPAGIPRKPGMTRDDLFKINAGIVRTLCEGVAKCCPNAIVNIISNPVNSTVPIAAEVFKRGGVYNPKRLMGVTALDVVRANTFVAEVVGVDPKEIDVPVVGGHAGITILPLLSQVNPSFSFTKEEIEYLTNRIQNGGTEVVEAKAGTGSATLSMAFAAAKFADACLHGLRGDAGVVQCAFVASEVTELPFFASKVRLGRAGIEEVYPLGPLSAYERSGLEKLKKELLASIDKGISSVRQ
MA_15580g0010		Group Ⅱ	Picea abies	296	MKPIVLFLLMLTKVPFLLLGVAADVGHINSRAEVAGYMGEEQLGTALENADVVIIPAGVPRKPGMTRDDLFNINAGIVKSLCSAIAKYCPEAIVNMISNPVNSTVPIAAEIFKKAGTYNEKKLFGVTSLDVVRAKTFYAAKAGVPVEEVDVPVVGGHAGITILPLFSQATPKPNSILSEEDIKALTKRTQEGGTEVVEAKAGKGSATLSMAYAGAVFASSVLKGLNGDPNIVECSYVQSNVTELPFFASKVRLGKNGVEEVLGLGSLSAYEQQGLEGLKSELKSSIEKGIKFASAN
MA_10431009g0010		Group Ⅰ	Picea abies	410	MASATSFMSSVSVSGFLAPICETRPSGAGLQASAVSFPTKKVFNTFSGLKAGVACESEASFFSHETNAVLWSSVSRPRSAENRQIVPSAGQIRASTFKVAILGAAGGIGQPLSLLIKMSPLISGLHLYDIANVKGVAADLSHCNTPAQILDFTGPAELANSLKDVDVVVIPAGVPRKPGMTRDDLFNINAGIVRTLVEAVADNSPNAFIQIISNPVNSTVPIAAEVLKKKGVYDPKKLFGVTTLDVVRANTFVAQKKNLRLIDVDVPVVGGHAGITILPLLSKTKPSVTFTQEEIEQLTIRIQNAGTEVVEAKAGAGSATLSMAYAAARFVESSLRALDGDPDVYECSYIQSELTELPFFASRIKLGKKGVEAVIASDLEGLTEYEQKSLEALKPELKA…
MA_10436068g0010		Group Ⅲ	Picea abies	340	MAKEPARVLVTGAAGQIGYALVPMIARGIMLGPDQPVILHMLDIPPAAEALNGVKMELIDAAFPLLKGIVATTDPVEACSGVNIAVMVGGFPRKEGMERKDVMSKNVSIYKSQASALEQHAAPNCKVLVVANPANTNALILKEFAPSIPEKNITCLTRLDHNRALGQISERLQVPISERLQVPVSDVKNVIIWGNHSSSQYPDVYHASVVTGAGEKAVRQLVADDAWLDGEFITTVQQRGAAIIKARKLSSALSAASSACDHIRDWVLGTPKGTWVSMGVYSDGSYDVPPGIIYSYPVTCENGSWSIVQGLPINEFSRKKLDATANELVEEKALAYSCLI
MA_10426242g0020		Group Ⅲ	Picea abies	352	MEKQLQKHSVARSSSTSSLGIDMAGTFFKSIHSAAPPSPSTRNTKITVVGVGNVGMAVAQTILTQELTTELALVDIQADKLRGEMLDLQHAAAFLPRTKIVAGTDYAITAGSDICVITAGARQRDGESRLDLVERNFHLFKSILVKYSPDTILLVVSNPVDILTYIAWKLSGLPSNKVMGSGTNLDSSRFRFMIADHLDVNAQDVQAYIIGEHGDSSVALWSSISVGGVPVLSFLDKQEIPYEKEHLEAIHQTVVNSAYEVIKLKGYTSWAIGYSTANLVKSVIRNQRRVHPVSVMAKDFHGIEEEVFLSLPAQLGRGGILGVASIHLTEEETHRLRISAEAIFEVQKHLLI
MA_494797g0010		Group Ⅲ	Picea abies	426	MPVFTSLDNCFCSSHRSPAECIPSIRLTPSPLQTQLLCNKFNLRQWAWLKPRRPKALRTVAASSASGKPTTPETTSKPPATLAVEIADVFFKSTHSARPSSHLRTGTKITVVGVGNVGMAIAQTILTQELTTELALVDIQGDKLRGEMLDLQHAAAFLPRTKIVANTDYAVTAGSDICVITAGARQRDGESRLDLVERNLDLVERNLHLFKSIVPQLTKYSPDTILLVVSNPVDILTYIAWKLSGLPSNRVLGSGTNLDSSRFRSLIADHLDVNAQDVQAYIVGEHGDSSVALWSSISVGGVPVLSLLEKQQIPYEKETLETIHSAVINSAYEVIRLKGYTSWAIGYSAASLVKSIVRNQKRIHPVSVLAKGFHGIEDDVFLSLPAQLGTGGVLGVANI…
MA_9415255g0010		Group Ⅲ	Picea abies	227	VAMELEDSLYPLLREVSIGVDPYEVFRDVEWALLIGAKPRGPGMERADLLDINGQIFAAQGKALNAVASPNVKVLVVGNPCNTNALICLKNAPKIPPKNFHALTRLDENRAKCQLALKAGVFYDKVSNMTIWGNHSTTQVPDFLNAKILGRPVKEIITDIKWLEVEFTEMVQKRGGVLIKKWGRSSAASTAVSIVDAIKSLTIPTPEGDWFSSGVSYMFDDIYVTST
MA_10426242g0030		Group Ⅲ	Picea abies	325	MWAWRSLGIDMAGAFFKSIHSAAPPSPSTRNTKITVVGVGNVGMAVAQTILTQELTTELALVDVQADKLRGEMLDLQHAAAFLPRTKIVADTDYAVTAGSDICVITAGARQREGESRLDLVERNFHLFKSIVPQLVKYSPDTVLLVVSNPVDILTYIAWKLSGLPSNKVMGSGSSLDVQAFIIGEHGDSSVALWSSISVGGVPVLSFLEKQEISYEKEHLEAIHQAVVNSAYEVIKLKGYTSWAIGYSTASLVKSVIRNQRRIHPVSVMAKDFHGIQEEVFLSLPAQLGRGGILGVASIHLTEEETQRLKKSADAIFEVQKLLDI
MA_10271377g0010		Group Ⅱ	Picea abies	116	MISNPVNSTVPIAAEVFKKAGTYNEKKLFGVTMLDVVRAKTFYAAKAGVPVQEVNIPVVGGHAGVTILPLFSQATPKPNTNLSDEDIKALTKRTQDGGTEVVEAKAGKGSATLSMA
evm_27.model.AmTr_v1.0_scaffold00140.51		Group Ⅲ	Amborella trichopoda	438	MALAESSCYYQASSKTCFLPTNKLCRPRSSHALRFQLQRPMVVCSVASNQAPAQAPPAVVPKAPEDATKRADCYGVFCVTYDLIAEEETTSWKKLIKVAVSGAAGMISNHLLFKLASGEVFGPDQPVALKLLGSERSFVALEGVAMELEDSLYPLLREVSIGIDPYEVFQDAEWALLIGAKPRGPGMERAGLLDINGQIFAEQGKALNAVASRNVKVIVVGNPCNTNALICLKNAPDIPAKNFHALTRLDENRAKCQLALKAGVFYDKVSNVTIWGNHSTTQVPDFLNARIHGMPVKEVITDTKWLEQEFTEKVQKRGGALIQKWGRSSAASTAVSVVDAIRSLITPTPKGDWFSSGVYTNGNPYGIAEDIVFSMPCRSEGNGEYELVPDIIIDDFLRE…
evm_27.model.AmTr_v1.0_scaffold00021.87		Group Ⅱ	Amborella trichopoda	344	MRASIIRSMEKALRRGSSMRRSFSSETKPERKVAVLGAAGGIGQPLALLMKLNPLVSSLSLYDIAGTPGVAADVSHINTRSQVAGFTGEDQLGQALEGCDLVIIPAGVPRKPGMTRDDLFNINAGIVKSLCTAIAKYCPHALINMISNPVNSTVPIAAEVFKKAGTYDEKKLFGVTTLDVVRAKTFYAGKAKVPVEQVNVPVVGGHAGITILPLFSQANPKSNALSDEEIQALTKRTQDGGTEVVEAKAGKGSATLSMAYAGAVFADACLKGLNGVPDIVECSYVQSSITELPFFASKVKLGKNGVEEVLGLGSLSDYEQQGLESLKGELKSSIEKGVKFAREN
evm_27.model.AmTr_v1.0_scaffold00033.38		Group Ⅰ	Amborella trichopoda	354	MQTDCNQRLARIAAHLHPPGLQMGERSGLRRSECRAKGGAPGFKVAVLGAAGGIGQPLAMLMKMNPLVSVLHLYDVVNSPGVTADVSHMDTSAVVRGFLGKEQLENALTGMDLVIIPAGVPRKPGMTRDDLFNINAGIVKTLCEGIVNCCPNAIVNLISNPVNSTVPIAAEVFKKAGTFDPKRLLGVTMLDVVRANTFVAEVLGVDPKDVDVPVVGGHAGVTILPLLSQVKPQYTFTADEVRYLTDRIQNGGTEVVEAKAGAGSATLSMAFAAAKFADTCLRGLRGDAGIVECAFVASQVTELPFFASKVRLGRGGAEEIYPLGPLNDYERSGLEKAKKELASSIEKGISFVRK
evm_27.model.AmTr_v1.0_scaffold00025.323		Group Ⅰ	Amborella trichopoda	411	MAAATASFSLGSAASFGTVSHSGSKLKSYGMRVNSAHHIKSYSGLKAAKGITLESEISFLGKGIYATLLASNRRPEILLRSSNHNFQPQASFKVAVIGAAGGIGQPLALLIKMSPLISALHLYDIANVKGVAADLSHCNTPAQVLGFTGPSELANSLKDVDVVVIPAGVPRKPGMTRDDLFNINAGIVKSSVEAVADNCPEAFIHIISNPVNSTVPIAAEVLKKKGVYNPKKLFGVTTLDVVRANTFVAEKKGLRLIDVDVPVIGGHAGITILPLLSRAKPSVKFSDEEIGELTVRIQNAGTEVVEAKAGGGSATLSMAYAAARFVESSLRALDGDGDVYECSYVQSELTELPFFASRVKLGRKGIEAFVKSDLEGLSEYEEKALEALKPELRASIEKG…
evm_27.model.AmTr_v1.0_scaffold00010.472		Group Ⅰ	Amborella trichopoda	413	MAKSAPASFSMGSVASYSTISCSRFKFSKPFVARNNSWNPIQSFCGLRPTTGLSLTSERSFLGQGSIASLQASKPTYLNQNKSISKSLQPKASFKVAILGAAGGIGQPLSLLIKMSPLVSSLHLYDIANVKGVAADLSHCNTPSKVLDFTGPSELADSLKGVDLVVIPAGVPRKPGMTRDDLFNINAGIVKTLIEAVADNCPEALICIISNPVNSTVPIAAEVLKQKGVCDPKKLFGVTTLDVVRANRFVAEKKNLRLIDVDVPVIGGHAGITILPLLSKTKPSVTFTKEEIEELTVRIQNAGTEVVEAKAGAGSATLSMAYAAARFVESSLRALDGDGDVFECSYVQSELTELPFFASRVKLGRKGVEAVISADLQGLTDYEEKALEALKPELKASIE…
evm_27.model.AmTr_v1.0_scaffold00106.119		Group Ⅲ	Amborella trichopoda	355	MANILLSFQRLLSYLWSWTLLPNALTFIKSLTTSPKQPIRVLVTGATGMLVTTKELKLGQIGYALVPMIARGEMLGPDQPVILHLLDIPQTAEVLDAVRMELVDAAFPLLKGIVATSDLVKACTDVNIVVMLGGLRHSVLEKHAAPNCKVLVVANPANTNALIFKEFAPSIAEKNVTCLTRLEHNRVLGQIAQRLYVHVSDVKNVIIWGNHSSSQYPDANHATVTTATGERPVRELVSNDQWLKGEFITTMQQPGATIIKARKLVSAFSEASAVCDHIRDWILGTPKDTWVSMGVYSDGSYGIPASLIYSFPVTCNGGEWSIVQGLEIDGFSRAKMDATTNDLISERALAYSCLN
evm_27.model.AmTr_v1.0_scaffold00007.48		Group Ⅲ	Amborella trichopoda	345	MAAASASLPPVKNGLDAAHALLLNPIHDTEPPSPTKRHTKVTVVGVGNVGMAIVHAILSQHLADELALIDAQADKLRGEVLDLQHAAAFLPRTTIKSSTDVSSAAYSDLCIITAGARQRPEESRLDLLKRNVQILSAIVPRLARAAPNSTILVVSNPVDVLTYVTYRLSGFPANRVIGSGTNLDSSRFRFMIAEHLRVNAHDVQAYMVGEHGDSSVALWSSVSVGGVGIVGLVKGEDAVLEEMRERVVKSAYEVIALKGYTSWAIGYSVGSLAGTLLRDQRKIQPVSVVAKGFHGIEEEVFLSLPAQLGRNGVIGVVNVELTEEETKRLRASAKKLWEVQQELGI
MBI34365_MAGBIO		Group Ⅰ	Magnolia biondii	818	MTTAAAATSSIGSIASYGPQTLSGSKTKPFNLNAASSVSCESEESFLGNEGNAALRASFAPRVEKQKQSFGNRLQPQASSFKVAVLGAAGGIGQPLSLLIKMSPLVSALHLYDIANVKGVAADLSHCNTPSQVLDFTGPSKLANSLKGVDVVVIPAGGPAKPGMTRDDLFDVNSNIVRNLVEAVADNCPDALIHIISNPVNSIVPIAAEVLKQKGVYNPKKLFGVTTLDVVRANTFVAQKKNLKLIDVDVPVVGAHAGITILPLLSKTKPSVSFSDEEVEELTVRIQNAGREVIEAKAGAGSATLSMAYAAARFVESSLRALDGDEDVYECSYVQSELTELPFFASRVKLGKQGVEAVISADIQGLTEYEVKALEALKPELKASIEKGVAFSQKKLATR…
MBI11258_MAGBIO		Group Ⅲ	Magnolia biondii	332	MAKDPVRVLVTGAAGQIGYALVPMIARGVMLGPDQPVILHMLDILPAAEALNGVKMELVDAAFPLLKGVVATTDVVEACTGVNVAVMVGGFPRKEGMERKDVMSKNVSIYKSQASALEKHAAANCKVLVVANPANTNALILKEFAPSIPEKNITCMTRLDHNRALGQISERLNIQVSDVKNVIIWGNHSSTQYPDVSHATVKTQGGEKPVKELVCDDEWLKGEFITTVQQRGAAIIKARKLSSALSAASGACDHIRDWVLGTPEGTFVSMGVYSDGSYNVPAGLIYSFPVTCRNGEWTIVQGLQIDEFSRKKLDATAEELTEEKALAYSCLS
MBI09515_MAGBIO		Group Ⅲ	Magnolia biondii	332	MAKDALRVLVTGAAGQIGYALVPMIARGVMLGPDQPVILHMLDIPPAAEALNGVKMELIDAAFPLLKGVVATTDAVEACKGVNVAVMVGGFPRKEGMERKDVMSKNVSIYKEQATALEQHAAKNCKVLVVANPANTNALILKEFAPSIPDKNISCLTRLDHNRALGQISERLNVPVSDVKNVIIWGNHSSTQYPDVNHAVVTTAGGEKSVRELVANDQWLNSEFITTVQQRGAAIIKARKLSSALSAASSACDHIRDWVLGTPKGTWVSMGVYSEGSYDIPMGLIYSFPVTCKNGEWSIVQGLKIDEHSRAKMDATANELIEEKSLANSCLN
MBI26742_MAGBIO		Group Ⅰ	Magnolia biondii	356	MQPSAEINQRIARISAHLHPSNLQMEESSILRRTACRAKGGAPGFKVAILGAAGGIGQPLALLMKMNPLVSVLHLYDVVNAPGVTADVSHMDTGAVVRGFLGQPQLEGALAGMDLVIIPAGVPRKPGMTRDDLFNINAGIVRTLCEGIAKCCPNAIVNLISNPVNSTVPIAAEVFKKAGTYDPKRLLGVTMLDVVRANTFVAEVLGIDPREVDVPVVGGHAGVTILPLLSQVKPPCSFTAQEITHLTDRIQNGGTEVVEAKAGTGSATLSMAYAAAKFADACLRGLRGDAGIVECSFVASQVTELPFFASKVQLGRTGAEEIFPLGPLNEFERSGLEKAKKELAGSIQKGISFIRK
MBI33606_MAGBIO		Group Ⅰ	Magnolia biondii	356	MQPTAEINQRIARISAHINPSNLQMEGSSRLRPAVCRSKGGASGFKVAILGAAGGIGQPLALLMKMNPLVSVLHLYDVVNSPGVTADISHMDTGAVVRGFLGAPQLESALTGMDLVIIPAGVPRKPGMTRDDLFNINAGIVKTLCEGVAKYCPHAIVNVISNPVNSTVPIAAEVFKKAGMFDPKRLLGVTMLDVVRANTFVAEVLGIDPRGVDVPVVGGHAGVTILPLLSQVKPPCSFTAEEINYLTDRIQNGGTEVVEAKAGAGSATLSMAYAAAKFADACLRGLRGDAGIVECSFVASQVTELPFFASKVRLGRNGAEEIYPLGPLNEYERSGLAKAKKELAASIEKGISFIRK
MBI04784_MAGBIO		Group Ⅰ	Magnolia biondii	413	MATTAAATFSTGSIASYGSQTFSGSKSHHFTVRFNSPNYLRSFSGLKAASSVSCESEESFLGKESNAALHAAFAPRVEKQKQSFDNRLQPRASSFKVAILGAAGGIGQPLALLIKMSPLVSVLHLYDIANVKGVAADLSHCNTPSQVLDFTGLSELPNSLKGVDVVVIPAGIPRKPGMTRDDLFNINANIVKTLVEAVADNCPDAFIQIISNPVNSTVPIAAEVLKQKGVYNPKKLFGVTTLDVVRANTFVAQKKNLKLIDVDVPVIGGHAGITILPLLSRTRPSVSFSNEEVEELTVRIQNAGTEVVEAKAGAGSATLSMAYAAARFVESSLRALDGDGDVYECSYVQSELTELPFFASRIKLGKQGVEAVMSADIQGLTEYEAKALEALKPELKASI…
MBI18012_MAGBIO		Group Ⅱ	Magnolia biondii	707	MKYSMLRSLETALRRRASSSSLSHLSRRSYSSGSNPERKVAVLGAAGGIGQPLALLMKLNPLVSKLALYDIAGTPGVAADVSHVNTRSEVAGYMGEDQLGQALEGSDLVVIPAGVPRKPGMTRDDLFNINAGIVKSLCTAIAKYCPNAIVNMISNPVNSTVPIAAEVFKKAGTYDEKKLFGVTMLDVVRAKTFYAGKAKVPVAEVNVPVVGGHAGITILPLFSQVTPKSNGLLDEEIKALTKRTQDGGTEVVEAKAGKGSATLSMAYAGAVFADACLKGLNGVPDIVECSYVQSSITELPFFASKVEKGALGSSGGILIAWRSAFWSLRSTFVGNYSVTVTLRSRVMGADFLICSVYGPTNKDRREDFWKELSSMTAFSDWINNNRLVDLPLTGSCFTW…
MBI04783_MAGBIO		Group Ⅰ	Magnolia biondii	391	MAATAAATFSTGSTASYGRQTSSGSKSKPFTMRFNSPNYLRSFSGLKAASSVSCESEESFLGKESNAALRASFAPRAEKQKQGFGNRLQPCASSFKVAILGAAGGIGQPLALLIKMSPLVSALHLYDIANVKGVAADLSHCNTPSQVLDFTGPSELPNSLKGVDVVVIPAGVPRKPGMTRDDLFNINANIVRTLVEAVADNCPDAFIQIISNPVNSTVPIAAQRANTFIAQKKNLKLIDVDVPVIGGHAGITILPLLSRTRPSVSFSNAEVEELTVRIQNAGTEVVEAKAGAGSATLSMAYAAARFVESSLRALDGDGDVYECSYIQSELTELPFFASRIKLGKQGVEAVISADIQGLTEYEAKALEALKPELRASIEKGMAFAQKQAAAV
MBI03669_MAGBIO		Group Ⅲ	Magnolia biondii	355	MANNPSPSPLFSSPTMGLGLDIAHHAFFKPINQSAPPPTQRPTKVSVVGAGNVGMAIAQTILTQDLVDELALVDAKPDKLRGEMLDLQHAAAFLPRTRIHASVDYNITARSDLCIVTAGARQIAGESRLNLLQRNLTLFRNIIPQLVHYSPDSILLVVSNPVDILTYVAWKLSGLPPNRVIGSGTNLDSSRFRFLIADHLDVNAQDVQADIVGEHGDSSVALWSSISVGGVPILSFLEKQEIGYEKETLERIHKAVVGSAYEVIKLKGYTSWAIGYSVASLARTLLRDQRRIHPVSVLAKGFYGIESGEVFLSLPVQLGRGGVVGVTNVHLSDDEAQQLKVSAETILEVQNRLGI
MBI45280_MAGBIO		Group Ⅲ	Magnolia biondii	296	MIARGVMLGPDQPVILHMLDIPPAAESLNGVKMELIDAAFPLLKGVVATTDVVEPCTGVNVAVMVGGFPRKEGMERKDVMSKNVSIYKSQASALEKHAAANCKVLVVANPANTNALILKEFAPSIPEKNITCMTQLDHNRALGQISERLNIQVSDVKNFIIWGNHSSTQYPDVSHATVKTQGGEKPVKELVCDDEWLKGEFITTVQQQGAAIIKARKLSSVLSAASGACDHIRDWVLGTLRELLFPWEYTLMDLTTYQRVSSILSRSHAAMENGLFYKDFKLMNFRGRNLMQLQRS
MBI36479_MAGBIO		Group Ⅰ	Magnolia biondii	349	MAATIAATFCTGSIASYGPQTFSGSKSKPFTMRFNSPNYLRSFSGLKAASSVSCESEESFLGKESNAALRASFAPRVEKQKQGFGNRLQPRASSFKVAILGAAGGIGQPLSLLIKMSPLVSALHLYDIANVKGVAADLSHCNTPSQVLDFTGPSELPNSLKGVDVVVIPAGIPRKPGMTRDDLFSINANIVRTLVEAVADNCPDAFIQIISNPVNSTVPIAAEVLKQKGVYNPKKLFSVTTLDVVRANKFVAQKKNLKLIDCSYIQSELTELPFFASRIKLGKQGVEAVISADIQGLTEYEAKALEALKPELKASIEKGVAFAQKQAAGICIVTTPSNLKKVERADIIA
MBI34292_MAGBIO		Group Ⅰ	Magnolia biondii	102	MRTLFRNLVEAVADNCPDAFIHIISNPVNSTIPISAEVLKQKGVYNPKKLFGVTTLDVVRAYTFVAQKKDLKLIDVDVSVVRGHAGSIRVGFELDSIRVESS
GWHPBGXC004588		Group Ⅲ	Camphora officinarum	440	MAIAEFSPSTRNPLLPSQFSSRPPNHLYNYRLRVLRQRPQRLTHAKVFCSVAPNQVQAPVLAPPTQGTGAKKSDCFGVFCVTYDLKAEEKTNSWKSLINIAVSGAAGMISNHLLFKLASGEVFGPDQPIALKLLGSEKSFQALEGVAMELEDSLYPLLREVSIGVNPYEVFQDVEWALLIGAKPRGPGMERAGLLDINGQIFAEQGKALNTVASRNAKVIVVGNPCNTNALICLKNAPNIPAKNFHALTRLDENRAKCQLAHKAGVFYDKVSNVTIWGNHSTTQVPDFLNARISGIPAKEVINDTEWLEKEFTERIQKRGGVLIQKWGRSSAASTAVSIVDAMRSLVTPTPEGDWFSSGVYTNGNPYGIAEDIVFSMPCRSRGDGDYELVHDVVFDDFL…
GWHPBGXC007663		Group Ⅲ	Camphora officinarum	510	MSCFNLQKKLPPPRRGWKFFTSTLQSNLHKLKQSKPIKNTKKQLNTLSSFLDRLRRPPLHLRSEKPAATILTSAPHVNRSQHHLHRPVYVDELFTEPVLAPVKLLEPTTSNKGAPSATTSKGTVSSKAVQLPLWGVDERAEKFISKFYDDMRLQREISLGEYQEMLARGAICSHPIDQMAKEPVRVLVTGAAGQIGYALVPMIARGVMLGPNQPVILHMLDIPPAAESLNGVKMELVDAAFPLLKGVVATTDVVEACTGVNIAVMVGGFPRKEGMERKDVMSKNVSIYKSQASALEKHAAANCKVLVVANPANTNALILKEFAPSIPEKNITCLTRLDHNRALGQISERLNVQVSEVKNVIIWGNHSSTQYPDVNHATVKTQGGEKPVKELVSDDEWLK…
GWHPBGXC012089		Group Ⅰ	Camphora officinarum	356	MQPSAEISQRISRISAHLHPPALQMEESSSLRRSACRAKGGAPGFKVAILGAAGGIGQPLAMLMKMNPLVSVLHLYDVVNAPGVTADVSHMDTGAVVRGFLGQVQLESALTGMDLVIIPAGVPRKPGMTRDDLFKINAGIVRTLCEGISKCCPHAIVNLISNPVNSTVPIAAEVFKKAGTYDPKRLLGVTTLDVVRANTFVAEVLGVDPREVNVPVVGGHSGITILPLLSQVKPPCSFTTEEISYLTDRIQNGGTEVVEAKAGAGSATLSMAYAAAKFADACLRGLRGDAGIVECSFVASQVTELPFFATKVRVGRCGAEEIYPLGPLNEFERSGLEKAKKELATSIEKGISFIRK
GWHPBGXC021173		Group Ⅲ	Camphora officinarum	374	MAKDAVRVLVTGAAGNLSFSGFQSRFDLSPLICFDSMLDIFVFLTRKEVDTHLFYTGQIGYALVPMIARGVMLGPDQPVILHMLDIPPAAEALNGVKMELIDAAFHLLKGVVATTDVVEACTDVNIVVMVGGFPRKEGMERKDVMSKNVSIYKAQASALEQYAAKDCKVLVVANPANTNALVLKEFAPSIPEKNITCLTRLDHNRALGQISERLNVEVSNVKNVIIWGNHSSTQYPDVNHATVTISSGEKSVRELVADDQWLNEEFIIMVQQRGAAIIKARKLSSALSAASAACDHIHDWVLGTPKGTWVSMGVYSDGSYGIPAGLIYSFPVTCANGQWSIVQDLKIDDFSRAKMDATANELIEEKSLAHSCLN
GWHPBGXC017701		Group Ⅱ	Camphora officinarum	342	MRSSMFRSAQTALRSRVSRSFSSESGPDRKVAVLGAAGGIGQPLALLMKLNPLVSKLSLYDIAGTPGVAADVSHINTRSEVAGYMGEDQLGQALEGSDVVIIPAGVPRKLGMTRDDLFNINAGIVKSLCIAIAKYCPNALVNMISNPVNSTVPIAAEIFKKAGTYDEKKLFGVTTLDVVRAKTFYAGKANVPVNEINVPVVGGHAGITILPLFSQAMPKSNALSDEDIKALTKRTQEGGTEVVEAKAGKGSATLSMAYAGAVFANACLKGLNGVPDIVECSYVQSSITELPFFASKVRLGKNGVEEVLGLGSLSDYEKEGLEKLIPDLKASIEKGIKFAKEN
GWHPBGXC016105		Group Ⅰ	Camphora officinarum	412	MIEQFCFHTSERCILCSASTHPNFVFITLICTSPHYIAYPTQLSLSLSLPDILLKKMQPSTEISQRIARISAHLQPPTLQMEESSGLRRSACRAKGGAPGYKVAILGAAGGIGQPLALLMKMNPLVSVLHLYDVVNAPGVTADVSHMDTGAVVRGFLGQPQLENALTGMDLVIIPAGVPRKPGMTRDDLFKINAGIVRTLCEGISKCCPKAIVNLISNPVNSTVPIAAEVFKKAGTYDPKRLLGVTTLDVVRANTFVAEVLGIDPREVDVPVVGGHSGVTILPLLSQVKPPCSFTVEEISYLTDRIQNGGTEVVEAKAGAGSATLSMAYAAAKFADTCLRGMRGDANIIECSFVASQVTELPFFATKVRLGRGGAEEIYPLGPLNEFERFGLEKAKKEL…
GWHPBGXC020298		Group Ⅰ	Camphora officinarum	415	MAPTAATTSPSFSVASVAYGSQAFSGSKAKPFLMKFNSPNYLRSFSGLKAMTSVSCESETSFLGKESNASLHNLFAPRMGKQRQSFSNRLQPRASSYKVAVLGASGGIGQPLALLVKMSPLVSALHLYDIANVKGVAADLSHCNTPSQVLDFTGPSELANCLKGVEVVVIPAGVPRKPGMTRDDLFNINANIVRTLVEAVADNCPDAFIHIISNPVNSTVPIAAEVLKQKGVYDPKKLFGVTTLDVVRANTFVAQKKNLKLIDVDVPVVGGHAGITILPLLSKTKPSVSFTDEEVEELTVRIQNAGTEVVEAKAGAGSATLSMAYAAARFVESSLRALDGDGDVYECSYVQSDLTELPFFASRIKLGKKGVEAIISSDLQGLTEYEVKALEALKPELKA…
GWHPBGXC011675		Group Ⅰ	Camphora officinarum	415	MAATTAATFSFGPVGSYGSQRTQTLGSKSKPYGMKSNSPNYLRGFSGLKAAGSVSCESETSFLGKESNAALRESFAPKAREQSQRFQNRLQPRASSFKVAVLGAAGGIGQPLALLIKMSPLVSALHLYDIANVKGVAADLSHCNTPSQVLDFTGPSELANSLKDVDVVVIPAGVPRKPGMTRDDLFNINANIVKTLVEAVADNCPEAFIHIISNPVNSTVPIAAEVLKQKGVYDPKKLFGVTTLDVVRANTFVAQRKNLKLIDVDVPVVGGHAGITILPLLSKTKPSVSFSDGEVEELTVKIQNAGTEVVEAKAGAGSATLSMAYAAARFVESSLRALDGDGDVYECSYVQSELTELPFFASRIKLGKKGVEAVISADLEGLTEYEEKALEALKPELKA…
GWHPBGXC001040		Group Ⅰ	Camphora officinarum	320	MEDTSSLKLAACRAKGGAPGFKVAVLGAAGGIGQPLALLMKMNPLVSVLHLYDVVNSPGVTADISHMDTGAVVRGFLGQQQLESALTGMDLVIIPAGVPRKPGMTRDDLFNINAGIVRTLCEGIAKCCPQAIVNVISNPVNSTVPIAAEVFKKAGTFDPKRLLGVTTLDVVRANTFVAEVLGIDPREVAVPVVGGHAGVTILPLLSQVKPPCSFSAEEIKYLTDRIQNGGTEVVEAKAGAGSATLSMAYAAAKFADACMRGLRADAGVVECSFVASQVTELPFFASKVRLGRNGAEEIYPLGPLNEFERSVLLVHCFFFF
GWHPBGXC017423		Group Ⅲ	Camphora officinarum	320	MAKDPVRVLVTGAADILILSVFDVEALIGVAGQIGYALVPMIARGVMLGPDQPVILHMLDIPPAAESLNGVKMELVDAAFPLLKGVVATTDVVEACTGVNIAVMVGGFPRKEGMERKDVMSKNVSIYKSQASALEKHAAANCKVLVVANPANTNALILKEFAPSIPEKNITCLTRLDHNRALGQISERLNVQVSDVKNVIIWGNHSSTQYPDVNHATQRGAAIIKARKLSSALSAASAACDHIRDWVLGTPEGTWVSMGVYSDGSYNVSPGLIYSFPVTCCNGDWKIVQGLSIDEFSRKKLDATAAELSEEKALAYSCLS
GWHPBGXC007910		Group Ⅱ	Camphora officinarum	260	MRSSMSRFVQTALRSRASSSPSSISRRSFSSESSYPERKVTVLGAAGGIGQPLALLMKLNPLVSKLALYDIAGTPGVAADVSHINTRSEVAGYMGEDQLGQALEGSDVVIIPAGVPRKPGMTRDDLFNINAGIATPKSNALSDEDIKALTKRTQEGGTEVVEAKAGKGSATLSMAYAGAVFADACLKGLNGVPDIVECSFVQSSITELPFFASKVRLGKNGLEEVLGLGPLSDYEKEGLENLKPELKSSIEKGIKFAKEN
GWHPBGXC024500		Group Ⅲ	Camphora officinarum	358	MEEEQGSHVPPLSSGKSSLQGLDIAHAFFKPLLQSAPPSSTKRNTKVSVIGAGNVGMAIAQTILTQDLTDELALVDAKPEKLRGEMLDLQHAAAFLPRTRILASVDYSVTTGSDLCIVTAGARQIPGESRLNLVQRNVALFSDIVPRLASHSPDSILLIVSNPVDVLTYAAWKLSGFPSNRVIGSGTNLDSSRFRFLIADHLDVNAQDVQAYIVGEHGDSSVALWSSISVGGVPVMSFLEKKEITYEKEALERIHKAVIRLKGYTSWAIGYSVASLARSLLRDQRRIHPVSVLAKGFYGMDAGEVFLSLPAQLGRGGVLAVTHVHLTEEEAERLRDSANAILEVQNHLHLGGGGGVVV
GWHPBGXC021964		Group Ⅲ	Camphora officinarum	325	MTTFNLTPSLPAPEDMGLGLDMAHAFFRPIDQSAPPSLTKRPTKVSIIGAGNVGMAIAQTILTQDLVDELALVDAKPDKLRGEMLDLQHAAAFLPRTRITASVDNAITAGSDLCIVTAGARQIDGESRLNLLQRNLALFSEIIPGLARHSPNSILLIVSNPVDVLTYIAWKLSGFPPNRVIGSGTNLDSSRFRFLISNHLDVNTQDVQKQEIAYEKETLEKIHKTVVGSAYEVIRLKGYTSWAIGYSVASLARTLLRDQRRIHPVSVIAKGFYGIEGGDVFLSLPSLLGRSGVLAVTNVHLTEEEAQQLRDSAKTILEVQNQLGI
CSS0028096.2		Group Ⅲ	Camellia sinensis	436	MVVAELSPSYTKTSLHSSQLSFFSSRLSDHRRISLPRPQNGRRVVCSVASNQVQAPSPVQTEEAKTKGDCYGVFCLTYDLEAEEDETKSWKKLINIAVSGAAGMISNHLLFKLASGEVFGPDQPIALKLLGSERSLQALEGVAMELEDSLFPLLREVNIGIDPYDVFQDVEWALLIGAKPRGPGMERAGLLDINGQIFAEQGKALNAVASRNVKVMVVGNPCNTNALICLKNAPNIPAKNFHALTRLDENRAKCQLALKAGVFYDKVSNVTIWGNHSTTQVPDFLNARINGIPVKEVIKDTKWLEEEFTEKVQNRGGVLIKKWGRSSAASTAVSIVDAIRSLVTPTPEGDWFSSGVYTNGNPYGIAEDLVFSMPCRSKGDGDYELVKDVIFDDYLLRRV…
CSS0029572.1		Group Ⅲ	Camellia sinensis	340	MIIRHISSFLNVEKEPITVLVTGQIGYALVPMIARGAMLGPDQPVILHMLDIQPAAEALKGLKMELVDAAFPLLRGIVATTDVVEACKGVNIAIMVGGFPRNKGMERKDVMSKNVSIYKAQASALEKHAAPNCKVLVVANPANTNALILKEFAPSIPEKNITCLTRLDHNRALGQISERIHVHVGDVKNVIIWGNHSSTQYPDVNHATVNTGTAHKPVRELVGDDNWLKTEFITTVQQRGAAIIQARKLSSALSAASSACDHIRDWVLGTPKGTWVSMGVYSDGSYGIQPGLIYSFPVTCENGDWSIVQGLKIDEFSRGKMDATAKELMEEKSLAYSCLK
CSS0011240.2		Group Ⅲ	Camellia sinensis	364	MDHLELVEKVVVVSGCLYLSWMIIRHISSFLNVEKEPITVLVTGATGQIGYALVPMIARGAMLGPDQPVILHMLDIQPAAEALKGVKMELVDAAFPLLRGIVATTDVVEACKGVNIAIMVGGFPRNKGMERKDVMSKNVSIYKAQASALEKHAAPNCKVLVVANPANTNALILKEFAPSIPEKNITCLTRLDHNRALGQISERIHVHVGDVKNVIIWGNHSSTQYPDVNHATVNTGTAHKPVRELVGDDNWLKTEFITTVQQRGAAIIQARKLSSALSAASSACDHIRDWVLGTPKGTWVSMGVYSDGSYGIQPGLIYSFPVTCENGDWSIVQGLKIDEFSRGKMDATAEELMEEKSLAYSCLK
CSS0040947.1		Group Ⅰ	Camellia sinensis	352	MQPSQRIARISAHLNPPNLQMEESSGLRQANCRARGGSSGFKVAILGAAGGIGQPLAMLMKMNPLVSVLHLYDVVNAPGVTADISHMDTSAVVRGFLGQKELENALIGMDLVIIPAGVPRKPGMTRDDLFNINAGIVKTLCEGIAKCCPNAIVNVISNPVNSTVPIAAEVFKKAGTYDPKRLLGVTMLDVVRANTFVAEVLGIDPREVDVPVVGGHAGVTILPLLSQVKPPCSFTPEETDYLTNRIQNGGTEVVEAKAGAGSATLSMAYAAVKFADACLRGLRGDASVVECAFVASQVTELPFFASKVRLGRTGIEEIYPLGPLNESERVGLEKTKKELAASIEKGISFVKT
CSS0026785.1		Group Ⅰ	Camellia sinensis	356	MQPSAEVNQRIARISAHLHPSNHQMEESSILRRANCRAKGGAPGFKVAILGAAGGIGQPLAMLMKMNPLVSVLHLYDVVNSPGVTADVSHMDTGAVVRGFLGQQQLEGALTGMDIVIIPAGIPRKPGMTRDDLFKINAGIVRTLCEGIAKCCPNALVNLISNPVNSTVPIAAEVFKKAGTYDPKRLLGVTMLDVVRANTFVAEVLGLDPREVDVPVVGGHSGVTILPLLSQVKPPCSFTPEETEYLTNRIQNGGTEVVEAKAGTGSATLSMAYAAAKFADACLRGLRGDAGVVECSFVASQVTELPFFASKVRLGRTGAEEIYQLGPLNEYERVGLEKAKKELAGSIHKGVSFIRA
CSS0050119.1		Group Ⅲ	Camellia sinensis	438	MAVAELSSSYTKTSLHSSQLSFLSNRLSNPSRRIDLQPLPPTRNARVVCSVASIQVQAPVPVHAEDPKMKRECYGVFYVTYDLKAEEQTKTWKKMINIAVSGAAGMISNHLLFKLASGEVFGRDQPIALKLLGSERSFQALEGVAMELEDSLYPLLKEVSIGIDPYDVFQDAEWALLIGAKPRGPGMERADLLEINGKIFAEQGKALNAVASRNVKVIVVGNPCNTNALICLKNAPNIPAKNFHALTRLDENRAKCQLALKAGVFYDKVSNMTIWGNHSTTQVPDFLNGRIDGLPVEEVIKDTKWLEEDFTEKIQKRGGVLIKKWGRSSAASTSVSIVDAIRSLVTPTPEGDWFSSGVFTNGNPYGVAEELVFSMPCRSKGDGDYELVKDVIFDDYLLK…
CSS0014392.1		Group Ⅰ	Camellia sinensis	356	MQPSGDVNQRIARISAHLNPPNLQMEESSGLRQANCRAKGGSCGFKVAILGAAGGIGQPLAMLMKMNPLVSVLHLYDVVNAPGVTADISHMDTSAVVRGFLGQKELENALIGMDLVIIPAGVPRKPGMTRDDLFNINAGIVKTLCEGIAKCCPNAIVNVISNPVNSTVPIAAEVFKKAGTYDPKRLLGVTMLDVVRANTFVAEVLGIDPREVDVPVVGGHAGVTILPLLSQVKPPCSFTPEETDYLTNRIQNGGTEVVEAKAGAGSATLSMAYAAVKFADACLRGLRGDAGVVECTFVASQVTELPFFASRVRLGRTGIEEIYPLGPLNESERVGLEKAKKELAASIEKGISFVKT
CSS0017189.1		Group Ⅰ	Camellia sinensis	356	MQPSAEVNQRIARISAHLHPSNHQMEESSILRRANCRAKGGAPGFKVAILGAAGGIGQPLAMLMKMNPLVSVLHLYDVVNSPGVTADVSHMDTGAVVRGFLGQQQLEGALTGMDIVIIPAGIPRKPGMTRDDLFKINAGIVRTLCDGIAKCCPNALVNLISNPVNSTVPIAAEVFKKAGTYDPKRLLGVTMLDVVRANTFVAEVLGLDPREVDVPVVGGHSGVTILPLLSQVKPPCSFTPEETEYLTNRIQNGGTEVVEAKAGTGSATLSMAYAAAKFADACLRGLRGDAGVVECSFVASQVTELPFFASKVRLGRTGAEEIYQLGPLTEYERVGLEKAKKELAGSIHKGVSFIRA
CSS0050211.1		Group Ⅱ	Camellia sinensis	761	MVSGFRGLRACCFRFSHTAAIPLPIHSSALSFRRRLFVTNCSASVAGKKEKVIVISGPTGAGKSRLALELAKRLNGEIISADSVQVYRGLDVGSAKPSLSERKEVPHHLVDILHPSEGYSVGKFFEDARQATRDILNNGRVPIVTGGTGLYLRWYIYGKPDVPKASPEITSEVYSKLAHFQKDVDWDAAVQLVVKAGDPWAQSLPTNDWEQFDSSVTDCSLDNYSSGDAHEESESMNLDYEFICFFLSSQRLELYRLIDFRCEDMLSGSDGILSEARWLLDIGLLPNSNSATRAIGYRQKRSVEFVKMGNLVHEAPVKARNFAKRQLTWFRNERIYHWIDASKPMDEVLNFIYDSYYNQNGSLTVPESLSMEREISSRRKSELKGYRTKNRRFISKYDC…
CSS0024273.1		Group Ⅲ	Camellia sinensis	332	MAKEPVRVLVTGAAGQIGYALVPMIARGVMLGPDQPVILHMLDIPPAAEALHGVKMELVDAAFPLLKGVVATTDVVEACTGVNIAVMVGGFPRKEGMERKDVMSKNVAIYKSQASALEKYAAANCKVLVVANPANTNALILKEFAPSISEKNITCLTRLDHNRALGQVSERLSVPVSDVKNVIIWGNHSSTQYPDVNHATVKTSAGEKPVRVLVANDEWLNGEFITTVQQRGAAIIKARKLSSALSAASSACDHIRDWVLGTPEGTWVSMGVYSDGSYNVPAGLIYSFPVTCRNGEWTIVQGLPIDELSRKKLDLTAEELSEEKALAYSCLS
CSS0050326.1		Group Ⅰ	Camellia sinensis	412	MAATSATTFSVRSTMSIGSKVSPISQPKAFGVRYNSKNCVKSISGLKPATSGSCESDSSFLRKESSAALRDSCTPKAQKQHQRSWKNPQPQASYKVAVLGAVGGIGQSLALLIKMSPLVSNLHLYDIANVKGVAADLSHCNTPSQVLDFTGASELANCLKGVNVVVIPAGVPRKPGMTRDDLFNINANIVKTLVEAVADNCPDAFIYIISNPVNSTVPIVAEVLKQKGVYDPKKLFGVITLDVVRANTFVAQKKNLKLIDVDVPVVGGHVGITILPLLSKTKPSVSFTDDEIHELTVRIQNAGTEVVEAKAGAGSATLSMAYAAARFVESSLCALDGDSNVYECSFIESDLTELPFFASRVKLGKKGIEAVISSDFQGLTEYEQKALEALKPELKSSIE…
CSS0040062.1		Group Ⅰ	Camellia sinensis	450	MAATSATTFSVRSTMSLGSKVSPISQPKAFGVRFNSKNCVKSFSGLKAATSGSCESDSSFLGKESSAALRDSCTPKAQKQYQRSWKNPQPQASYKVAVLGAAGGIGQPLALLIKMSPLVSNLRLYDIANVKGVAADLSHCNTPSQVLDFTGASELANCLKGVNVVVIPAGVPRKPSMTRDDLFNINANIVKTLVEAVADNCPDAFIHIISNPVNSMVPITVEVLKQKVKTLVEAVADNCPDAFIHIISNPVNSTVPIAAEVLKQKGVYDPKKLFGVTTLDVVRASTFVAQKKNLKLIDVDVPLVGGHARITILPLLSKTKPSVSFTDDEIHELTVRIQNAGTEVMEAKAGAGSATLSMAYAAARFVESSFHALDGDSDVYECCFIESDLTELPFFASRV…
CSS0040190.1		Group Ⅰ	Camellia sinensis	412	MAATSATTFLVRSTMSLGSKVSPISQPKAFGVRFNSKNCVKSFNGLKAATFGSCESDSSFLGKESSAALRDSCTPKAQKQYQRSWKNPQPQASYKVAVLGAAGGIGQPLALLIKMSPLVSNLHLYDIANVKGVAADLSHCNTPSQVLDFTGASELGNCLKGVNVVVIPAGVPRKPGMTRDDLFNINANIVKTLVEAVADNCPDAFIHIISNPVNSTVPIAAKVLKQKGVYDPKKLFGVTTLDVVRANTFVAQKKNLKLIDVDVPVVGGHAGITILPLLSKTKPSVSFIDDKIHELTVRIQNARTEVMEAEAGAGFATLSMACAAARFVESSLRALDRDSDVYECCFIKSDLTELPFFASRVKLGKKGVEAVISSDFQGLTEYEQKALEALKPELKSSIE…
CSS0037300.1		Group Ⅲ	Camellia sinensis	350	MHHTESSSSLGPGGLDIAQAFFKPIQNMAPPSPTNRHTKISVIGTGNVGMAIAQTILTQDLADTLALVDAIPNKLRGEMLDLQHAAAFLPRTKILASVDYSVTAGSDLCIVTAGARQNPGESRLNLLQRNVALFSKIVPPLAKHSPETILLIVSNPVDVLTYVAWKLSGFPSNRVIGSGTNLDSSRFRFLIADHLDVNAQDVQAYIVGEHGDSSVALWSSISVGGVPVLSFLERQQIAYEKETLEKIHKEVVESAYEVISLKGYTSWAIGYSVANLARTILRDQRRIHPVSVIAKGFYGIADGDVFLSLPAQLGRSGVLGVTNVHLTEEEARKLRDSAKTILEVQNQLGV
CSS0016480.1		Group Ⅲ	Camellia sinensis	336	MHHTESSSSLGPGGLDIAQAFFKPIQNMAPPSPTNRHTKISVIGTGNPTTLALVDAIPNKLRGEMLDLQHAAAFLPRTKILASVDYSVTAGSDLCIVTAGARQNPGESRLNLLQRNVALFSKIVPPLAKHSPETILLIVSNPVDVLTYVAWKLSGFPSNRVIGSGTNLDSSRFRFLIADHLDVNAQDVQAYIVGEHGDSSVALWSSISVGGVPVLSFLERQQIAYEKETLEKIHKEVVESAYEVISLKGYTSWAIGYSVANLARTILRDQRRIHPVSVIAKGFYGIADGDVFLSLPAQLGRSGVLGVTNVHLTEEEARKLRDSAKTILEVQNQLGV
CSS0040266.1		Group Ⅲ	Camellia sinensis	349	MQKSASSSSFGPGGLDIAQSFFKPIQKTSPPSPTKRHTKISVIGAGNVGMAITQTVLTQGLADELALVDANPDKPRGEMLDLQHAAAFLPRTTILASVDYSVTSGSDLCIVTAGARQNPGESRLNLLQRNVALYEKIVPQIVKYSPETILMIVSNPVDVLTYIAWKLSGFPSNRVIGSGTNLDSSRFRFLIADHLDVNAQDVQAYIVGEHGDSSVALWSSISVGGVPVLSFLERQQIVYEKETLEKIHKQVVESAYEVISLKGYTSWAIGYSVASLARAILRGQRSIHPVSVLAKGFYDIGGDVFLSLPAQLGRSGVLGVANVHLTDEEAQKLRDSAKTILEVQSKLGI
CSS0004025.1		Group Ⅱ	Camellia sinensis	403	MLRSTATTLRRASSSSSSPSSTHLLRRSCSSDSNPDHKVTVLGAAGGIGQPLALLIKLNPLVAGFMGEEQLGQALDGADLVIIPAGVLRKPGMTRDDLFNINAGIVKSLCSALVNMISNPVNSTIPIAAEVFKKQRDNQDCYVFGVTMLDVVRAKTFYAGKAKVPMAHVNVPVVGGHAGITILPLFSQATPKAYVSDEDIKARTKRTQNGGTEVVEEKAGKGSATLSMAYAGTIFVDAYLKGLNGVPNVVECSFVQSTITELPFFASKFFGLGVLCPSRMVVFQYLNFCFFFLNACHEVVAWRDGKFHPSPALRCGFKSQESNLSTKNGVPNPAGTFKEAARLGSMGVQVQMRIRVMPIWKNLRSQHMLVSSPFLMMEIHKARLRWLVSKQCVEDVQFR…
CSS0033201.1		Group Ⅱ	Camellia sinensis	286	MKASMLRSTVTTLRRASSSSSSSSTHLLRRSFSSDSNPDRKVALNPLVSSLSLYDIFGTPGVAADVCHINTHAQVAGFMRDEQLGMALRGADLVIILVGVPRKPGMSRDDLFNTNAGIIKSLCSTIAKYCHNALVNMISNPVNSTVPIATEVFKKAGTYDEKKLFGVTMLDVVRAKTFYAGKAKVPVAGIFISEATPKANLSDEDIKALTKRTQDGGTEVVEAKAGKGSATLSMGLNGVPNVIECSFVQSTITELPFFASKTWICHPRMGLENMILPLSSGLKTHN
CSS0033057.2		Group Ⅰ	Camellia sinensis	289	MAATSATTFSVRSTMPLGSKVSPISQPKAFGVRFNSKNCVKNFSGLKAATSGSCESDSSFLGKESSAALRDSCTPKAQKQYQRSWKNPQPQASYKVAVLGAAGGIGQPLALLIKMSPLVSNLRLYDIANVKGVAADLSHCNTPSQVLDFTGASELANCLKGVNVVVIPAGVPRKPGMTRDDLFNINANIVKTLVEAVADNCPDAFIHIISNPVNSTVPIAAEVLKQKGVYDPKKLFGVTTLDVVRANTFVAQKKNLKLIDVDVPVVGGHAGITILPLLSKTKPSVSFHR
CSS0022423.1		Group Ⅱ	Camellia sinensis	190	MLEMQLKVAGFMGEEQLGQALEGCDIVIIPAGVAGTRDDLFNINAGIVKSLCTAIAKYCPQALVNMISNPVNSAVPIGAEVFKKARTYDEKKLFGVTTLDVVRAKTFYAGKVKVPVEGVSVPVIGGHAGITILPLFSQRRSVVDLWEDGRHFNGLRSGRGQGMLREKRGGSERPCYVILVALVVFLWPHL
MD02G1243100		Group Ⅲ	Malus pumila	440	MAVAELSKPSYTKTRLFQSSQLSSLSTHLHSHSRLTFRPLHHTRNSRICCSVAPNQVQAPAAPEKTQDPKSKAECFGVFCLTYDLIAEEETKSWKKLINIAVSGAAGMISNHLLFKLASGEVFGPDQPIALKLLGSERSLQALEGVAMELEDSLFPLLREVSIGIDPYEVFQDAEWALLIGAKPRGPGMERAGLLDLNGQIFVEQGKALNAVASRNVKVIVVGNPCNTNALICLKNAPNIPAKNFHALTRLDENRAKCQLALKAGVFYDKVSNVTIWGNHSTTQVPDFLNATINGLPVKEVIKDHKWLEEEFTESIQKRGGVLIKKWGRSSAASTAVSIADAMKSLVTPTPEGDWFSSAVYTNGNPYGIAEDLVFSMPCRSKGDGDYELVKDIQFDDYL…
MD03G1240100		Group Ⅱ	Malus pumila	339	MRPSMSIARSVHRVARRSYSSASVPERKVAVLGAAGGIGQPLALLMKLNPLVSHLSLYDIAGTPGVAADVSHINTRSEVKGYAGEEQLAQALEGADVVIIPAGVPRKPGMTRDDLFNINAGIVKGLTTAIAKYCPNALINMISNPVNSTVPIAAEVLKKAGKYDEKRLFGVTTLDVVRAKTFYAGKANVNVAEVNVPVVGGHAGVTILPLFSQATPAANLPHDVIVALTKRTQDGGTEVVEAKAGKGSATLSMAYAGAIFADACLKGLNGVPDVVECSYVQSSITELPFFASKVRLGKNGVEEVLGLGNLSDFEQEGLQKLIPELKSSIEKGIRFANQS
MD07G1073300		Group Ⅲ	Malus pumila	439	MAVAELSTPSYTKTHLFQLSQLSSLSTHLHSHRRVAFRPLPHTRNARICCSVAPNQVQAPAAPAQTEDPKNKPECFGVFCLTYDLQAEEETKSWKKLINIAVSGAAGMISNHLLFKLASGEVFGPDQPIALKLLGSERSFQALEVAMELEDSLFPLLREVSIGIDPYEVFQDVEWALLIGAKPRGPGMERADLLDLNGQIFVEQGKALNAVASHNVKVIVVGNPCNTNALICLKNAPNIPAKNFHALTRLDENRAKCQLALKAGVFYDKVSNVTIWGNHSTTQVPDFLNARINGLPVKEVIKDHKWLEEEFTELIQKRGGVLIKKWGRSSAASTAMSIADAIKSLITPTPEGDWFSSAVYTNGNPYGIAEDLVFSMPCRSKGDGDYELVKDIQFDDYLR…
MD11G1259400		Group Ⅱ	Malus pumila	339	MRPSISIARSVHRVARRSYSSASVPERKVAVLGAAGGIGQPLALLMKLNPLVSHLSLYDIAGTPGVAADVSHINTRSEVKGYAGEEQLAQALEGADVVIIPAGVPRKPGMTRDDLFNINAGIVKGLTTAIAKYCPNALINMISNPVNSTVPIAAEVLKKAGKYDEKRLFGVTTLDVVRAKTFYAGKANANVAEVNIPVVGGHAGITILPLFSQATPTANLPHDVIKALTKRTQDGGTEVVEAKAGKGSATLSMAYAGAIFADACLKGLNGVPDVVECSFVQSSITELPFFASKVRLGKNGVEEVLGLGNLSDFEQEGLQSLIPELKSSIEKGIKFANQS
MD10G1216900		Group Ⅲ	Malus pumila	332	MAKNPVRVLVTGAAGQIGYAIVPMIARGVMLGPDQPVILHMLDIEPAAEALNGVKMELIDAAFPLLKGVVATTDAQEACKDVNIAIMVGGFPRKEGMERKDVMSKNVSIYKAQASALEKHAASDVKVLVVANPANTNALILKEYAPKIPEKNITCLTRLDHNRALGQISEKLNVHVGDVKNVIIWGNHSSTQYPDVNHANVTTSSEEKPVRELVANDQWLNTEFITTVQQRGAAIIKARKLSSALSAASSACDHIRDWVLGTPKGTWVSMGVYSDGSYGIQKGLIYSFPVTCEKGQWSIVQGLKIDEFSRGKLDATAKELIEEKSLAYSCLN
MD05G1238800		Group Ⅲ	Malus pumila	277	MELIDAAFPLLKGVVATTDAQEACKDVNIAVMVGGFPRKEGMERKDVMSKNVSIYKAQASALEKHAASDVKVLVVANPANTNALILKEYAPKIPEKNITCHTRLDHNRALGQISEKLNVHVGDVKNVIIWGNHSSTQYPDVNHATVTTSSGEKPVRELVANDQWLNTEFITTVQQRGAAIIKARKLSSALSAASSACDHIRDWVLGTPKGTWVSMGVYSDGSYGIQQGLIYSFPVTCDKGQWSIVQGLKIDDFSRGKLDATAKELIEEKTLAYSCLN
MD13G1214000		Group Ⅲ	Malus pumila	332	MAKEPARVLVTGAAGQIGYALVPMIARGIMLGADQPVILHLLDIPPAAEALNGVKMELVDAAFPLLKGVVATTDVVEACTGVNIAVMVGGFPRKEGMERKDVMTKNVSIYKSQASALEKHAAPNCKVLVVANPANTNALILKEFAPSIPEKNITCLTRLDHNRALGQVSERLNVQVSDVKNVIIWGNHSSSQYPDVNHATVKTPSGEKCVRELVADDAWLNGEFISTVQQRGAAIIKARKLSSALSAASSACDHIRDWVLGTPEGTWVSMGVYSDGSYNVPSGLIFSFPVTCQNGEWKIVQGLSIDEFSRKKLDATADELSEEKALAYSCLS
MD16G1219000		Group Ⅲ	Malus pumila	332	MAKEPARILVTGAAGQIGYALVPMIARGIMLGADQPVILHLLDIPPAAEALNGVKMELVDAAFPLLKGVVATTDVVEACNGVNIAVMVGGFPRKEGMERKDVMTKNVSIYRSQASALEKHAAPNCKVLVVANPANTNALILKEFAPSIPEKNITCLTRLDHNRALGQVSERLNVQVSDVKNVIIWGNHSSSQYPDVNHATVKTPSGEKGVRELVADDAWLNGEFISTVQQRGAAIIKARKLSSALSAASSACDHIRDWVLGTPEGTWVSMGVYSDGSYDVPSGLIFSFPVTCQHGEWKIVQGLSIDEFSRKKLDATAEELSEEKALAYSCLS
MD05G1112700		Group Ⅰ	Malus pumila	356	MESSVGANGRIAKISAHLFPPNSQVEDGSALSRGDCRAKGGAPGFKVAIVGAAGGIGQPLAMLMKMNPLVSVLHLYDVVNAPGVTADISHMDTGAVVRGFLGQPQLESALTGIDLVIIPAGVPRKPGMTRDDLFKINAGIVRTICEGIAKACPKAIVNLISNPVNSTVPIAAEVFKKAGTYDPKRLLGVTMLDVVRANTFVAEVLGLDPREVDVPVVGGHAGVTILPLLSQVKPPCSFTKEETEYLTNRIQNGGTEVVEAKAGAGSATLSMAYAAVKFADACLRGLRGDAGVVECAFVASEVTELPFFATKVRLGRGGAEEIYQLGPLNEYERVGLEKAKTELAASIQKGVSFIKK
MD02G1194500		Group Ⅰ	Malus pumila	360	MQQQPSPEVNAYQRIARISAHLDPPNLQMENAATVSRLNCRAKGGAAGFKVAILGAAGGIGQPLALLMKMNPLVSVIHLYDVVNTPGVTSDISHMDTGAVVRGFLGQQQLEEALTGMELVIIPAGVPRKPGMTRDDLFNINAGIVKTISEAIAKCCPYAIVNVISNPVNSTVPIAAEVFKKAGTFDPKKLLGVTMLDVVRANTFVAEVLGLDPRDIDVPVVGGHAGVTILPLLSQVKPPCSFTPKEVDYLTDRIQNGGTEVVEAKAGAGSATLSMAYAAVKFADACLRGLRGDAGVVECAFLASQVTELPFFASKVRLGRTGAEEIYPLGPLNEYERAGLEKAKKELAASIQKGVSFVRK
MD15G1304800		Group Ⅰ	Malus pumila	360	MQQHPSSEVNANQRIARISAHLDPPNLQMENAATVNRLNCRAKGGTAGYKVAILGAAGGIGQPLAMLMKMNPLVSVLHLYDVVNTPGVTSDISHMDTGAVVRGFLGQQQLDEALTGMELVIIPAGVPRKPGMTRDDLFNINAGIVKTISEAIARCCPYAIVNVISNPVNSTVPIAAEVLKKAGTFDPKKLLGVTMLDVVRANTFVAEVLGLDPRDVGVPVVGGHAGVTILPLLSQVKPPCSFTPKEVDDLTYRIQNGGTEVVEAKAGAGSATLSMAYAAVKFADACLRGLRGDAGVVECAFVASQVTELPFFASKVRLGRTGAEEIYPLGPLNEYERAGLEKAKRELATSIQKGVSFVRK
MD06G1193800		Group Ⅰ	Malus pumila	413	MAATSAATFSIGTNCSLGHKAASFQQTKPCALRFNSQNLLKSSFNGLKATTSFNCETETSFSGKETAKALRASFARKAHKDAQVVQSQFQPQASYKVAVLGAAGGIGQPLALLIKMSPLVSSLHLYDIANVKGVAADLSHCNTPSEVLDFTGAAELPSSLKGVDVVVIPAGVPRKPGMTRDDLFNINAGIVRNLIEAVADNCPDAFIHIISNPVNSTVPIAAEVLKQKGVYNPKKLFGVSTLDVVRANTFVAQKKNLKLIDVDVPVVGGHAGITILPLLSKTKPSVSLTDEEVEQLTVRIQNAGTEVVEAKAGAGSATLSMAYAAARFVESSLRALDGDGDVYECSYVASDLTELPFFASRVKLGRNGIEAFIPSDLQGLTEYEQKALEALKPELKASI…
MD16G1010900		Group Ⅲ	Malus pumila	355	MSTMHKSSSGSALGPGGLDLTQAFFKPISRADPPSPTKRHTKISVVGAGNVGMAIAQTILTQDVADELVIVDVNPNKLRGEMLDLQHAAAFLPRTKIMASVDYAVTVGSDLCIVTAGARQNPGESRLNLLQRNVSLFRNIIPPLVKYSPDTILLIVSNPVDVLTYVAWKLSGLPSNRVIGSGTNLDSSRFRFLIADHLDVNAQDVQAYIVGEHGDSSVALWSSISVGGVPVLNFLEKQQIAYEKETLENIHKAVVESAYEVISLKGYTSWAIGYSAANLARSILRDQRKIHPVSVLAKGFYGVEGGDVFLSLPAQLGRGGVLGVANIHLTDEEAQRLRDSANTILEVQAQLNLGI
MD10G1115300		Group Ⅰ	Malus pumila	320	MLMKMNPLVSVLHLYDVVNAPGVTADISHMDTGCCGMNSSSNLLFSLFLDKNVITIYKIVLGFLRQPQLESALMSIDLVIIPAGVPRKPGMTRDDLFNINAGIVRTIYEGIAKVCPKAIVNLISNPVNSTVPIAAEVFKKGGTCDPKRLLGVTMLDVVRANTFVAEVLGLDPREVDVPVVGGHAEVDVPVVRGFFLSYLQNKWAAAQACKIQKTVCLCMQVKPHCSLTKEETEYLTNWIQNGGTEVVEAKAGAGSTTLSMAYTTVKFAYACLRGLRGDAGVVECTFVASEVTELPFFATKVQLGRSGAEEIYQLGPLNER
POPTR_001G287400	PtMDH1	Group Ⅰ	Populus trichocarpav	356	MESIREASQRIARISAHLQPPNSQTEESCVLKRADCRAKGGAPGFKVAILGAAGGIGQPLAMLMKMNPSVSVLHLYDVVNTPGVTADIGHMDTGAVVRGFLGQPQLENALTGMDLVIIPAGVPRKPGMTRDDLFNINAGIVITLCEGIAKCCPNAIVNLISNPVNSTVPIAAEVFKKAGTYDPKRLLGVTMLDVVRANTFVAEVLGLHPKEVDVPVVGGHAGVTILPLLSQVKPPSSFTPEETEYLTKRIQDGGTEVVQAKAGAGSATLSMAYAAVKFADACLRGLRGDAGVVECAFVASEVTELPFFATKVRLGRRGAEEVYQLGPLNEYERVGLGRAKKELAESIQKGVSFIRK
POPTR_001G376500	PtMDH2	Group Ⅱ	Populus trichocarpav	344	MRNSMLRSIKSLTTSPSSHVLRRGYASEAVPERKVAVLGAAGGIGQSLSLLMKLNPLVSNLALYDIANTPGVAADVSHINTRSEVVGYASDAELGKALEGADVVIIPAGVPRKPGMTRDDLFNINAGIVKGLCEAIAKHCPNALVNMISNPVNSTVPIAAEVFKKAGTYDPKRLFGVTTLDVVRAKTFYAGKAMVPVAEVNVPVVGGHAGITILPLFSQATPKANLSDEVITALTKRTQDGGTEVVEAKAGKGSATLSMAYAGAIFADACLKGLNGVPDVIECSFVQSTVTELPFFASRVRLGKNGVEEVLGLGPLSDFEKEGLEKLKPELKSSIEKGIKFATQ
POPTR_002G141700	PtMDH3	Group Ⅲ	Populus trichocarpav	364	MDHAVLLQKILVVSFIVALFWKIIRYMCNLLNVEKEPVRVLVTGAAGQIGYAIVPMIARGVMLGPDQPVILHLLDIEPAAEALNGVKMELIDAAFPLLKGVIATTDPIEACMGVNIAVMVGGFPRKEGMERKDVMSKNVSIYKAQASALEKHAAEDCKVLVIANPANTNALILKEFAPSIPEKNITCLTRLDHNRALGQISESLDVQVSDVKNVIIWGNHSSTQYPDVNHATVQTSSGEKPVRELVSDDKWLNAEFITTVQQRGAAVIKARKLSSALSAASAACDHIRDWVLGTPEGTWVSMGVYSDGSYGIQPGLVYSFPVTCEKGKWSIVQGLKIDDFSRAKMDATAKELVEEKSLAYSCLN
POPTR_002G141900	PtMDH4	Group Ⅲ	Populus trichocarpav	334	MPKDAVRILVTGAAGQIGYALAPMIARGIMLGPDQPVILHLLDIQPVAESLKGVRMELIDAAFPLLQGILATTDVNEACKGVNIAVMVGGFPCKEGMERRDVMHKNVPIFKAQASALEQHAAPDCKILVVANPANTNALILKEFAPSIPVKNITCLTRLDHNRALSHISERLNVDVRDVKNVIIWGNHSSTQYPDANYAIATTDIGEKSVRELVADDHWIDYEYINSVRERGAEIIKARKLSSALSAASAACDHVHDWIIGTAKGTWVSMGVYSDGSYGIQPDIIYSFPVTCQKGEWSIVQGLKINEFSREKMDTSMKELTREESLAYSCLNQT
POPTR_004G054200	PtMDH5	Group Ⅱ	Populus trichocarpav	348	MKAAVLRSSRAALRPCTCRHLVGRSYSSTESSPESKVAILGAAGGIGQPLALLMKLNPLISSLSLYDIANTPGVAADVSHINSRAQVAGYAGEEQLGEALDGSDIVIIPAGVPRKPGMTRDDLFKINAGIVKSLCTAIAKYCPNALVNMISNPVNSTVPIAAEVFKKAGTFDERKLFGVTTLDVVRAKTFYAGKVKVPVAEVNVPVVGGHAGITILPLFSQAAPKSSNLSDDDIKALTKRTQDGGTEVVEAKAGKGSATLSMAYAGAVFADACLKGLNGVPDIVECSFVQSSITDLPFFASKVRLGKNGVEEVFGLGPLSDYEQQGLESLKPELKASIEKGVEFANQN
POPTR_004G112800	PtMDH6	Group Ⅰ	Populus trichocarpav	412	MAATSAATFSAGSTVAFGTKASQLPQSKPSAVRFKSQKSLATFSGLKAATFVKCESESSFLGKESSAALRGSVVPKAQKSSQKSQYHLNPQASYKVAILGAAGGIGQPLALLVKMSPLVSALHLYDIANVKGVAADISHCNTPAQVLDFTGASELPNSLKGVDVVVIPAGIPRKPGMTRDDLFNINASIVKNLVEAVADNCPDAFIHIISNPVNSTVPIAAEVLKKKGVYDPKKLFGVTTLDVVRANTFVAQKKNLKLIDVDVPVVGGHAGITILPLLSKTKPSVSFTDEEVQELTVRIQNAGTEVVQAKAGAGSATLSMAYAAARFVESSLRALDGDADVYECSFVQSDLTELPFFASRVKLGRKGVEALISSDLQGLTTYEQEALEALKPELKASIE…
POPTR_007G009100	PtMDH7	Group Ⅰ	Populus trichocarpav	354	MQQSNLRIARIAAHINPPNLQMVEEDLGLERVNCRAKGASSGFKVAILGAAGGIGQPLAMLMKMNPLVSLLHLYDVVNAPGVTADISHMDTSAVVRGFLGQQQLEDALIGMDLVIIPAGVPRKPGMTRDDLFNINAGIVKTLCEAIAKCCPKAIVNIISNPVNSTVPIAAEVFKKAGVFDPKRVLGVTMLDVVRANTFVAEIMGLDPREVDVPVVGGHAGVTILPLLSQVKPLCSFTQKEIDYLTDRIQNGGTEVVEAKAGAGSATLSMAYAAVKFADACLRALRGDAAVVHCAYVASAVTELPFFASKVRLGRNGVEEIYPLGPLNDYERAGLEKAKKELAGSIQKGVSFVKK
POPTR_008G031700	PtMDH8	Group Ⅲ	Populus trichocarpav	456	MSVADLTTSPVTSTYTKTSSRLHSPQLSLSSTRLSVHFSRSPRPNPRAQNFKITCSVNQVPAPVAVQTEEAKSKSECFGVFCQTYDLKAEEETKSWKKLINVAVSGAAGMISNHLLFKLASGEVFGPDQPIALKLLGSERSFQALEGVAMELEDSLYPLLREVSIGINPYEVFEDVEWALLIGAKPRGPGMERAGLLDINGQIFAEQGKALNAVASRNVKVIVVGNPCNTNALICLKNAPNIPAKNFHALTRLDENRAKCQLALKAGVFYDKVSNMTIWGNHSTTQVPDFLNARINGIPVKEVIKDHKWLEEEFTEKVQKRGGVLIQKWGRSSAASTAVSIADAMKSLVTPTPEGDWFSSGVYTSGNPYGIAQDIVFSMPCRSKGDGDYELVKDVTFDE…
POPTR_008G166800	PtMDH9	Group Ⅲ	Populus trichocarpav	392	MAKEPVRVLVTGAAGQIGYALVPMIARGVMLGPDQPVILHMLDIPPAAEALNGVKMELVDAAFPLLKGVVATTDVVEACTGVNIAVMVGGFPRKEGMERKDVMSKNVSIYKSQASALEKHAAANCKVLVVANPANTNALILKEFAPSISEKNITCLTRLDHNRALGQISERLSVQVCDVKNVIIWGNHSSSQYPDVNHATVKTPAGEKPVRELVKDDEWLNAEFITTVQQRGAAIIKARKLSSALSAASSACDHIRDWVLGTPEGTWVSMGVYSDGSYNVPAGLIYSFPVTCQNGEWKIVQGKDCQLKCHHFPLTLHDFMPIYEIIIVRYYLFLVNVQDSFVCISGILVLFLWCLLVTAYIFMMYFLSLKTCSFSCFPCTSVICSNLMFSFA
POPTR_009G081600	PtMDH10	Group Ⅰ	Populus trichocarpav	343	MESVANQRIARMEESCVLKRTDCRAKGGAPGFKVAILGAAGGIGQPLAMLMKMNPLVSVLHLYDVVNAPGVTADISHMDTGAVVRGFLGQPQLESALTGMDLVIIPAGVPRKPGMTRDDLFKINAGIVRTLCEGVAKCCPNAIVNLISNPVNSTVPIAAEVFKKAGTYDPKRLLGVTMLDVVRANTFVAEVLGLDPREVDVPVVGGHAGVTILPLLSQAKPPSSFTPEETEYLTKRIQDGGTEVVQAKAGAGSATLSMAYAAVKFADACLRGLRGDAGVVECAFIASEVTELPFFATKVRLGRRGAEEVYQLGPLNEYERVGLQKAKKELAESIQKGISFIRK
POPTR_010G071000	PtMDH11	Group Ⅲ	Populus trichocarpav	332	MAKEPARVLVTGAAGQIGYALVPMIARGVMLGPDQPVILHMLDIPPAAEALNGVKMELVDAAFPLLKGVVATTDVVEACTGVNIAVMVGGFPRKEGMERKDVMSKNVSIYKSQASALEKHAAANCKVLVVANPANTNALILKEFAPSIPEKNITCLTRLDHNRALGQISERLNVQVSDVKNVIIWGNHSSTQYPDVNHATVKTPAGEKPVRELVKDDAWLNAEFITTVQQRGAAIIKARKLSSALSAASSACDHIHDWVLGTPEGTWVSMGVYSDGSYNVPAGLIYSFPVTCQNGEWKIVQGLSIDEFSRKKLDLTADELSEEKALAYSCLT
POPTR_011G096300	PtMDH12	Group Ⅱ	Populus trichocarpav	367	MMLRSIKSLATSPSSHILRRGYASEAVPDRKVAVLGAAGGIGQPLALLMKLNPLVSSLALYDIANTPGVAADVSHINTRSEVSGYSGEAELGKALEGADVVIIPAGVPRKPGMTRDDLFNINAGIVKGLCQAIAKYCPHALVNMISNPVNSTVPIAAEVFKKAGTYDPKRLFGVTTLDVVRAKTFYAGKAKVPVAEVNVPVVGGHAGITILPLFSQATPKANLSDAEITALTKRTQDGGTEVVEAKAGKGSATLSMAYAGAIFADACLKGLNGAPDVVECSYVQSTITELPFFASKISLMKKGSLLCEGSLMLCTFIRCSTLVRLGKNGVEEVLGLGPLSDYEKEGLEKLKPELQSSIEKGIKFANQ
POPTR_017G101900	PtMDH13	Group Ⅰ	Populus trichocarpav	412	MAATSAATFSIGSTISLGTKGSQLPQSKPLSVRFNSQNTLATFSGLKAAIFVKCESESSFLGKESSAALRGAAAPKAQKSSQRSQYNLNPQASYKVAILGAAGGIGQPLALLVKMSPLISALHIYDIANVKGVAADLSHCNTPSQVLGFTGSSELPNSLKGVDVVVIPAGVPRKPGMTRDDLFSINANIVKTLVEAVADNCPDAFIHIISNPVNSTLPIAAEVLKQKGVYDPKKLFGVTTLDVVRANTFVAQKKNLKLIDVDVPVVGGHAGITILPLLSKTRPPVSFNDEEVQELTVRIQNAGTEVVEAKEGAGSATLSMAYAAARFVESSLRALDGDADVYECSFVQSDLTELPFFASRVKLGRKGVEAIISSDLQGLTEYEQKALEALKPELKASIE…
POPTR_017G102000	PtMDH14	Group Ⅰ	Populus trichocarpav	412	MAAASAATFSVGSAFSFGTKASQLPQSKLSSVRFNSQSSLATFSGLKAATFVTCESESSFLGKESNAALRCSVAPKAQKSSQRSQHRLNPQASYKVAVLGAAGGIGQPLALLIKMSPLVSALHLYDIANVKGVAADLSHCNTPSQVLDFTGAAELPNSLKGVDIVVIPAGVPRKPGMTRDDLFNINASIVKTLVEAVADNCPDAFIHIISNPVNSTVPIAAEVLKKKGVYDPKKLFGVTTLDVVRANTFVAEKKNLKLIDVDVPVVGGHAGITILPLLSKTKPSVSFTDEEVQELTVRIQNAGTEVVEAKAGAGSATLSMAYAAARFVESSLRALDGDADVYECSFVQSDLTDLPFFASRVKLGRKGVETIISSDLQGLTEYEQKALEALKPELKASIE…
POPTR_017G152000	PtMDH15	Group Ⅱ	Populus trichocarpav	262	MKAAVLRSSRAALRPCTSRHLVGRSYSSTESRPERKVAILGAAGGIGQPLALLLKLNPLISSLSLYDIANTPGVAADVSHINSRAQVAGYAGEEQLVEALDGSDVVIIPAGVPRKPGMTRDDLFKINAGIVKSLCTAIAKYCPNALVNMISNPVNSTVPIAAEVFKNAGTFDERKLFGVTTLDVVRAKTFYAGKVKVPVAEVNVPVVGGHAGITILPIFCHDPNPGSMTGNARAVSKGHPTYAKPQNKHIKRTIYSKIHSIS
POPTR_T143500	PtMDH16	Group Ⅱ	Populus trichocarpav	348	MKAAVLRSSRAALRPCTSRHLVGRSYSSTESRPERKVAILGAAGGIGQPLALLMKLNPLISSLSLYDIANTPGVGADVSHINSRAQVAGYAGEEQLGEALDGSDIVIIPAGVPRKPGMTRDDLFKINAGIVKSLCTAIAKYCPNALVNMISNPVNSTVPIAAEVFKKAGTFDERKLFGVTTLDVVRARTFYAGKVKVPVAEVNVPVVGGHAGITILPLFSQAAPKSSNLSDDDIKALTKRTQDGGTEVVEAKAGKGSATLSMAYAGAVFADACLKGLNGVPDIVECSFVQSSITDLPFFASKVRLGKNGVEEVFGLGPLSDYEQQGLESLKPELKASIEKGVEFANQN
VIT_213s0019g05250.3		Group Ⅲ	Vitis vinifera	333	MISNHLLFKLAAGEVFGPDQPIAFKLLGSERSFQALEGVAMELEDSLFPLLREVSIGIDPYEVFQDVEWALLIGAKPRGPGMERADLLDINGQIFAEQGKALNAVASRNVKVMVVGNPCNTNALICMKNAPNIPAKNFHALTRLDENRAKCQLALKAGVFYDKVSNVTIWGNHSTTQVPDFLNARINGLPVKEVIKDIKWLEEEFTEKVQKRGGVLIQKWGRSSAASTAVSIVDAMKSLVTPTPEGDWFSSGVYTTGNPYGVAEGIVFSMPCRSKGDGDYELVKDVIFDEYLLKRITKTEAELLAEKRCVAHLTGEGIAFCDLPEDTMLPGEM
VIT_213s0019g05250.4		Group Ⅲ	Vitis vinifera	426	MALAYLSPSYANTQLHLHSSQLSFLSTHLSFHRRHSLRPLPRTRNARISCSVASNEAPVAVQAQDQKIKPECFGVFCTTYDLKAEEETKSWKKLINIAVSGAAGMISNHLLFKLAAGEVFGPDQPIAFKLLGSERSFQALEGVAMELEDSLFPLLREVSIGIDPYEVFQDVEWALLIGAKPRGPGMERADLLDINGQIFAEQGKALNAVASRNVKVMVVGNPCNTNALICMKNAPNIPAKNFHALTRLDENRAKCQLALKAGVFYDKVSNVTIWGNHSTTQVPDFLNARINGLPVKEVIKDIKWLEEEFTEKVQKRGGVLIQKWGRSSAASTAVSIVDAMKSLVTPTPEGDWFSSGVYTTGNPYGVAEGIVFSMPCRSKGDGDYELVKDVIFDEYLLKR…
VIT_213s0019g05250.1		Group Ⅲ	Vitis vinifera	437	MALAYLSPSYANTQLHLHSSQLSFLSTHLSFHRRHSLRPLPRTRNARISCSVASNEAPVAVQAQDQKIKPECFGVFCTTYDLKAEEETKSWKKLINIAVSGAAGMISNHLLFKLAAGEVFGPDQPIAFKLLGSERSFQALEGVAMELEDSLFPLLREVSIGIDPYEVFQDVEWALLIGAKPRGPGMERADLLDINGQIFAEQGKALNAVASRNVKVMVVGNPCNTNALICMKNAPNIPAKNFHALTRLDENRAKCQLALKAGVFYDKVSNVTIWGNHSTTQVPDFLNARINGLPVKEVIKDIKWLEEEFTEKVQKRGGVLIQKWGRSSAASTAVSIVDAMKSLVTPTPEGDWFSSGVYTTGNPYGVAEGIVFSMPCRSKGDGDYELVKDVIFDEYLLKR…
VIT_213s0019g05250.2		Group Ⅲ	Vitis vinifera	437	MALAYLSPSYANTQLHLHSSQLSFLSTHLSFHRRHSLRPLPRTRNARISCSVASNEAPVAVQAQDQKIKPECFGVFCTTYDLKAEEETKSWKKLINIAVSGAAGMISNHLLFKLAAGEVFGPDQPIAFKLLGSERSFQALEGVAMELEDSLFPLLREVSIGIDPYEVFQDVEWALLIGAKPRGPGMERADLLDINGQIFAEQGKALNAVASRNVKVMVVGNPCNTNALICMKNAPNIPAKNFHALTRLDENRAKCQLALKAGVFYDKVSNVTIWGNHSTTQVPDFLNARINGLPVKEVIKDIKWLEEEFTEKVQKRGGVLIQKWGRSSAASTAVSIVDAMKSLVTPTPEGDWFSSGVYTTGNPYGVAEGIVFSMPCRSKGDGDYELVKDVIFDEYLLKR…
VIT_219s0014g01640.2		Group Ⅱ	Vitis vinifera	351	MKASMAMRSVRSALRSGSSSSPSHFLRRCYCSESVPERKVTILGAAGGIGQPLALLMKINPLVSNLALYDIAGTPGVAADVSHVNTISQVAGFMGEDQLGKALEGSDVVIIPAGVPRKPGMTRDDLFNINAGIVKSLCIAIAKYCPNALVNVISNPVNSTVPIAAEVFKKAGTFDEKKLFGVTTLDVVRAKTFYAAKAKVPVSEVNVPVVGGHAGITILPLFSQTTPKSNNLSDEDIQALTKRTQDGGTEVVEAKAGKGSATLSMAYAGAIFADACLKGLNGVPEVVECSYVQSSITELPFFSSKVRLGKNGVEEVLGLGPLSDYEKEGLEKLKPDLKASIEKGIKFAAQS
VIT_215s0021g02410.3		Group Ⅲ	Vitis vinifera	246	MVGGFPRKEGMERKDMMKKNVSIYKAQASALEQHAAPNCKVLVVANPANTNALILKEFAPSIPEKNVTCLTRLDHNRALGQISEKLFVHVGDVKNAIIWGNHSSTQYPDVNHATVSTCNGEKPVRELIADDNWINTEFITTVQQRGAAIIKARKLSSALSAASSACDHIRDWVLGTPKGAWVSMGVYSDGSYGIQPGIIYSFPVTCEKGEWSIVQGLKIDEFSRGKMDATAKELMEEKALAYSCLN
VIT_210s0003g01000.1		Group Ⅱ	Vitis vinifera	352	MKASLFRSAEAALRRVSSPSASSHLLRRSYCVESKPERKVAVLGAAGGIGQPLALLMKLNPLVSSLSLYDIAGTPGVAADVSHINTRSQVAGYMGDDQLGQALEGADLVIIPAGVPRKPGMTRDDLFNINAGIVKSLCTAIAKYCPNALVNMISNPVNSTVPIAAEVFKKAGTYDEKKLFGVTTLDVVRAKTFYAGKAKVPVAEANVPVVGGHAGITILPLFSQATPKSNNLSDEDIVALTKRTQDGGTEVVEAKAGKGSATLSMAYAGAVFADACLKGLNGVPDVVECSFVQSTIVPDLPYFASKVKLGKNGVEEVLGLGPLSDYEKQGLESLKHELKASIEKGIKFATQS
VIT_215s0021g02410.1		Group Ⅲ	Vitis vinifera	332	MAKDAVRVLVTGAAGQIGYALVPMIARGLMLGPDQPVILHMLDIEPAAEALNGVKMELIDAAFPLLRGVVATTDAIEACKDVNIAVMVGGFPRKEGMERKDMMKKNVSIYKAQASALEQHAAPNCKVLVVANPANTNALILKEFAPSIPEKNVTCLTRLDHNRALGQISEKLFVHVGDVKNAIIWGNHSSTQYPDVNHATVSTCNGEKPVRELIADDNWINTEFITTVQQRGAAIIKARKLSSALSAASSACDHIRDWVLGTPKGAWVSMGVYSDGSYGIQPGIIYSFPVTCEKGEWSIVQGLKIDEFSRGKMDATAKELMEEKALAYSCLN
VIT_207s0005g03350.1		Group Ⅲ	Vitis vinifera	332	MAKEPVRVLVTGAAGQIGYALVPMIARGVMLGADQPVILHMLDIPPAAEALNGVKMELVDAAFPLLKGVVATTDVVEACTGVNIAVMVGGFPRKEGMERKDVMSKNVSIYKSQASALENHAAANCKVLVVANPANTNALILKEFAPSIPEKNISCLTRLDHNRALGQVSERLNVQVSDVKNVIIWGNHSSTQYPDVNHATVKTPAGEKPVRGLVGDDAWLNGEFITTVQQRGAAIIKARKLSSALSAASAACDHIRDWVLGTPEGTWVSMGVYSDGSYNVPAGLIYSFPVTCCAGEWKIVQGLHIDEFSRKKLDLTAQELSEEKELAYSCLS
VIT_207s0005g03350.2		Group Ⅲ	Vitis vinifera	332	MAKEPVRVLVTGAAGQIGYALVPMIARGVMLGADQPVILHMLDIPPAAEALNGVKMELVDAAFPLLKGVVATTDVVEACTGVNIAVMVGGFPRKEGMERKDVMSKNVSIYKSQASALENHAAANCKVLVVANPANTNALILKEFAPSIPEKNISCLTRLDHNRALGQVSERLNVQVSDVKNVIIWGNHSSTQYPDVNHATVKTPAGEKPVRGLVGDDAWLNGEFITTVQQRGAAIIKARKLSSALSAASAACDHIRDWVLGTPEGTWVSMGVYSDGSYNVPAGLIYSFPVTCCAGEWKIVQGLHIDEFSRKKLDLTAQELSEEKELAYSCLS
VIT_217s0000g06270.1		Group Ⅰ	Vitis vinifera	413	MAATSLTTITIGSSASIGSKAIPLSRSKCFGVSFNSQNYLKSFSGLKAASSISCESEASFLGKESSAALRNSFAPKAGKQNLRHQYYLQPQASSSKVAILGAAGGIGQPLALLIKMSPLVSALHLYDIANVKGVAADLSHCNTPAQVLDFTGTSELANSLKGVDVVVIPAGVPRKPGMTRDDLFNINANIVKTLVEAVADNCPDAFIHIISNPVNSTVPIAVEVLRRKGVYDPKKVFGVTTLDVVRANTFVAQKKNLRLIDVDVPVVGGHAGITILPLLSRTKPSVSFTDEEVEELTVRIQNAGTEVVEAKAGAGSATLSMAYAAARFVESSLRALDGDTDVYECAYVQSELTELPFFASRVKIGKKGIEAVISSDLQGLTEYEEKALEALKPELKASI…
VIT_203s0088g01190.1		Group Ⅰ	Vitis vinifera	356	MQPTAEANQRIARLSAHLYPSVRQMEESSVLRRANCRAKGGAPGFKVAILGAAGGIGQPLAMLMKMNPLVSVLHLYDVVNAPGVTADISHMDTGAVVRGFLGQPQLESALTGMDLVIIPAGVPRKPGMTRDDLFNINAGIVRTLCEGIAKCCPNAIVNLISNPVNSTVPIAAEVFKKAGTYDPKRLLGVTMLDVVRANTFVAEVLGLDPREVDVPVVGGHSGVTILPLLSQVKPPCSFTPEETQYLTNRIQNGGTEVVEAKAGAGSATLSMAYAAVKFADACLRGLRGDAGVVECTFVASQVTELPFFATKVRLGRSGAEEIYQLGPLNEYERVGLEKAKKELAGSIAKGISFIRK
VIT_200s0373g00040.1		Group Ⅰ	Vitis vinifera	434	MEIGEREVDGDLGFRIGLFELGPKDQVPRFPTILGKSSGLTSSLTSSYVLCIYLFLPTAHSWQLLNTDRLPRRPGEETMHPTSDANQRIARISAHLQPSNFQMGESSGLSRENCRAKGGAPGFKVAILGAAGGIGQPLAMLMKMNPLVSVLHLYDVVNTPGVTSDISHMDTGAVVRGFLGQQQLEDALTGMDLVIIPAGVPRKPGMTRDDLFNINAGIVKTLCEGIAKCCPNAIVNLISNPVNSTVPIAAEVFKKAGTFDPKRLLGVTMLDVVRANTFVAEVLGLDPREVDVPVVGGHAGVTILPLLSQVKPPCSFTPEEIDYLTARIQNGGTEVVEAKAGAGSATLSMAYAAVKFADTCLRGLRGDAGVIQCAYVFSQVTELPFFASKVRLGRTGAEE…
VIT_214s0108g00870.1		Group Ⅰ	Vitis vinifera	413	MAATSTANFFTTSTASCNSKPCMVSKSKPFGLRFNSPNYLRNFSGLKAATSVSCESESSFLGKESTAAFRDSFAPKAVKQNSDSITRFQPRASSFKVAILGAAGGIGQPLALLIKMSPLVSTLHLYDIANVKGVTADLSHCNTPSQVLGFTGAAELPNSLKGVDVVVIPAGVPRKPGMTRDDLFNINANIVKDLVEAVADTCPDAFIHIISNPVNSTVPIAAEVLKQKGVYDPKKLFGVTTLDVVRANTFVAQRKNLKLIDVDVPVVGGHAGITILPLLSKTKPSVSFTDEEVEELTVRIQNAGTEVVEAKAGAGSATLSMAYAAARFVESSLRALDGDTDVYECSYVQSELTELPFFASRIKLGKKGVEAVIPSDLQGLTEYEAKALEALKPELKASI…
VIT_202s0154g00350.1		Group Ⅲ	Vitis vinifera	350	MHKSGSASSLGPGGLDLTQAFFKPIQQTAPPSPTKRHTKVSVIGVGNVGMAIAQTILTQDLVDELALVDVNADKLRGEMLDLQHAAAFLPRTKIHASVDYAITAGSDLCIVTAGARQIAGESRLNLLQRNVSLFSRIVPPLAKYSPDSILLIVSNPVDILTYVAWKLSGFPSNRVLGSGTNLDSSRFRFLIADHLDVNAQDVQAYIVGEHGDSSVALWSSISVGGVPVLSFLEKQQIAYEKETLENIHKAVIDSAYEVISLKGYTSWAIGYSAASLARSILRNQRRIHPVSVLAKGFYGIEGGDVFLSLPAQLGRGGILGVTNVHLTDEEAQRLRDSAKTILEVQNQLGL
VIT_215s0048g00640.1		Group Ⅲ	Vitis vinifera	359	MTSMEKSSSASSLGPLGLDIAQSFFKPIQQAAPPSPTKRHTKISVIGVGNVGMAIAQTILTQGLIDELALVDVNPDKLRGEMLDLQHAAAFLPRTKILASVDYSVTAGSDLCIVTAGVRQGSGESRLNLVQRNVKLFSCIIPQLAHSSPDSILLIVTNPVDVLTYVAWKLSGFPSNRVIGSGTNLDSSRFRFLIADHLDVSAQDVQAFIVGEHGDSSVALWSSISVGGVPILGFLENQQITFSKETLENIHKEVINSAYEVISLKACTSWAIGYSVASLARTILRDQRRIHPVSILAKGFYGIDGDEVFLSLPVQLGRSGVLGVANVHLTDEEAQRLRDSAEIIAQVQSQLNVTNLDIS
VIT_203s0088g01190.2		Group Ⅰ	Vitis vinifera	315	MQPTAEANQRIARLSAHLYPSVRQMEESSVLRRANCRAKGGAPGFKVAILGAAGGIGQPLAMLMKMNPLVSVLHLYDVVNAPGVTADISHMDTGAVVRGFLGQPQLESALTGMDLVIIPAGVPRKPGMTRDDLFNINAGIVRTLCEGIAKCCPNAIVNLISNPVNSTVPIAAEVFKKAGTYDPKRLLGVTMLDVVRANTFVAEVLGLDPREVDVPVVGGHSGVTILPLLSQVKPPCSFTPEETQYLTNRIQNGGTEVVEVICLFHFLGLVTLVLSKYLIQFRLIVFLIIGYSFYNILNFQCTTICWDACYLFSVY
VIT_219s0014g01640.1		Group Ⅱ	Vitis vinifera	265	MKASMAMRSVRSALRSGSSSSPSHFLRRCYCSESVPERKVTILGAAGGIGQPLALLMKINPLVSNLALYDIAGTPGVAADVSHVNTISQVAGFMGEDQLGKALEGSDVVIIPAGVPRKPGMTRDDLFNINAGIVKSLCIAIAKYCPNALVNVISNPVNSTVPIAAEVFKKAGTFDEKKLFGVTTLDVVRAKTFYAAKAKVPVSEVNVPVVGGHAGITILPLFSQIFKLLQSEHKMGGRKLWKQRLERALQLYQWPMQEPFLLMLA
PH02Gene36806.t1		Group Ⅲ	Phyllostachys edulis	433	MDLSSLYSPARSHLSPSPLAANAARRRSVQLLRPRRPVLATVRCSVDAPKQQLQGAVAAEAPAVRGECYGVFCTTYDLKADDKTKSWKSLVNVAVSGAAGMISNHLLFKLASGEVFGPDQPIALKLLGSERSLQALEGVAMELEDSLYPLLREVNIGIDPYEVFEDAEWALLIGAKPRGPGMERAALLDINGQIFAEQGKALNAVASRNVKVIVIGNPCNTNALICLKNAPNLPAKNFHALTRLDENRAKCQLALKAGVFYDKVSNVTIWGNHSTTQVPDFLNAKIHGRPIKEVIKDTKWLEEEFTMTVQKRGGVLIEKWGRSSAASTAVSIVDAIRSLVTPTPEGDWFSTGVYTSGNPYGIAEDIVFSMPCRSKGDGDYELVKDVMIDDFLWGRIKKS…
PH02Gene37657.t1		Group Ⅲ	Phyllostachys edulis	293	MELEDSLFPLLREVSIGIDPYVVFEDAEWALLIGAKPRGPGMERAALLDINGQIFSEQGKALNAVASRNVKVIVVGNPCNTNALICLKNAPNLPAKNFHALTRLDENRAKCQLALRAGVFYDRVSNVTIWGNHSTTQVPDFLNAKVNGRPVKEVIKDTKWLEEEFTMTVQKRGGVLIEKWGRSSAASTAVSIVDAIRSLVTPTPEGDWFSTGVYTAGNPYGIAEDMVFSMPCRSKGDGDYELVKDVMTDEFLWDRIKKSEAELVAEKRCVAHLTGEGNAFCDLPGDTMLPGEM
PH02Gene35320.t1		Group Ⅲ	Phyllostachys edulis	431	MPMAPASPSTFTTKPQTLSPHAAARRSGSALLLRRPRRSLRVRCSVQAPKQAQEAPPVAADGRGECYGVFCTTYQLMADEETKTWKKLVNVAVSGAAGMISNHLLFKLASGEVFGPDQPVALKLLGSQRSFQALEGVAMELEDSLYPLLREVSIGIDPYEVFQDVEWALLIGAKPRGPGMERADLLDINGQVFAQQGKALNAVASRNVKVLVVGNPCNTNALICLKNAPDIPAKNFHALTRLDENRAKCQLALKAGVFYDRISNMTTWGNHSTTQVPDFLNARIDGKPVKEVIRDTKWLEEEFTKIVQKRGSALIQKWGRSSAASTAVSIVDAIRSLVNPTPEGDWFSSGVYTTGNPYGIAEDIVFSMPCRSKGDGDYQLVKDVMIDDFLWEQIKKSEA…
PH02Gene22399.t1		Group Ⅲ	Phyllostachys edulis	332	MAKEPMRVLVTGAAGQIGYALVPMIARGVMLGADQPVILHMLDIPPAAEALNGVKMELVDAAFPLLKGVVATTDAVEACAGVNVAVMVGGFPRKEGMERKDVMSKNVSIYKSQASALEAHAAPNCKVLVVANPANTNALILKEFAPSIPEKNITCLTRLDHNRALGQISERLNVQVSDVKNVIIWGNHSSTQYPDVNHATVKTPSGEKPVRELVTDDEWLNAEFITTVQQRGAAIIKARKLSSALSAASSACDHIRDWVLGTPEGTWVSMGVYSDGSYGVPAGLIYSFPVTCGGGEWKIVQGLPIDEFSRKKMDATAQELSEEKALAYSCLN
PH02Gene20714.t1		Group Ⅲ	Phyllostachys edulis	415	MKAYPTPTDNSTPQNVGPTFSEGGTVVWYRSPVATDSGEPLAARLNNGHPFPPRLTIPCGRRLLSQTSLPEPSRSSPPPPPVPMAKEPMRVLVTGAAGQIGYALVPMIARGVMLGADQPVILHMLDIPPAAEALNGVKMELVDAAFPLLKGVVATTDAVEACTGVNVAVMVGGFPRKEGMERKDVMSKNVSIYKSQASALEAHAAPNCKVLVVANPANTNALILKEFAPSIPEKNITCLTRLDHNRALGQISERLNVQVSDVKNVIIWGNHSSSQYPDVNHATVKTPSGEKPVRELVKDDEWLNAEFITTVQQRGAAIIKARKLSSALSAASSACDHIRDWVLGTPEGTWVSMGVYSDGSYGVPAGLIYSFPVTCSGGEWKIVQGLPIDEFSRKKMDAT…
PH02Gene14211.t1		Group Ⅱ	Phyllostachys edulis	340	MRPSLMRSASQLLRRRSYSSASGQPERKVAILGAAGGIGQPLALLMKLNPLVSSLSLYDIAATPGVAADVSHINSPAQVKGFMGDDQLGEALEGSDVVIIPAGVPRKPGMTRDDLFNINAGIVKNLCTAIAKYCPNALVNMISNPVNSTVPIAAEVFKKAGTYDERRLFGVTTLDVVRAKTFYAGKANVPVTDVNVPVVGGHAGITILPLFSQATPATNALSDEDIKALTKRTQDGGTEVVEAKAGKGSATLSMAYAGAVFADACLKGLNGVPDIVECSYVQSTVTDLPFFASKVRLGKSGVEEVLGLGQLSDFEKEGLENLKGELKSSIEKGIEFANKN
PH02Gene50011.t1		Group Ⅱ	Phyllostachys edulis	340	MRPSLMRSASEFLRRRSYSSVSGQPERKVAILGAAGGIGQPLALLMKLNPLVSSLSLYDIAATPGVAADVSHINCPAQVKGFVGEDELGEALEGSDVVIIPAGVPRKPGMTRDDLFNINAGIVKNLCTAIAKYCPDAIVNMISNPVNSTVPIAAEIFKKAGTYDERRLFGVTTLDVVRAKTFYAGKANVPVTDVNVPVVGGHAGVTILPLFSQATPATNALSDEDIKALTKRTQDGGTEVVEAKAGKGSATLSMAYAGAVFADACLKGLSGVPDIVECSYVQSTVTDLPFFASKVRLGKNGVEEVLGLGQLSDFEKEGLESLKGELKSSIEKGIKFANEN
PH02Gene22252.t1		Group Ⅱ	Phyllostachys edulis	346	MRPSLLRSASQLLRRRRRRRDYSSAAAGGQPERKVAILGAAGGIGQPLALLMKLNPLVSSLSLYDIAATPGVAADVSHINTPALVKGFVGDDQLGEALEGSDVVIIPAGVPRKPGMTRDDLFNINAGIVKTLCTAIAKYCPNAVVNMISNPVNSTVPIAAEVFKKAGTYDEKKLFGVTTLDVVRAKTFYAAKANVPVTEVNVPVVGGHAGITILPLFSQATPASNALSHEDIKALTKRTQDGGTEVVEAKAGKGSATLSMAYAGAVFGDACLKGLNGVPDIVECSFVQSTVTELPFFASKVRLGKNGVEEVLGLGELSAFEKEGLENLKGELKSSIEKGIRFAQQN
PH02Gene24266.t1		Group Ⅲ	Phyllostachys edulis	355	MPSNFLLQRLVRWCPWVLRDEPKQPVKVLVTGAAGQIGYAIVAMIARGLMLGPDQPVVLHMLDLPRAADALNGVRMELADAALPLLRGVVATIDETEAFRGVNVAILIGGFPRKEGMERKDLIAKNVPIYKSQASALQQHAAPNCKVLVVANPANTNALVLKEFAPVIPAKNITCLTRLDHNRALGQVSEKLNVLVSDVKNAIIWGNHSSTQFPDASHAIAKTEHGEKPVKELIADEKWLREEFVNTVQQRGAAVIKARKQSSSLSAASAACDHMRDWILGTPKFARQGTWVSMGVYSDGSYGVPEGLFYSFPVTCEKGEWSIVQGLQIDDFARTKMEASACELKEEKSIAYAFL
PH02Gene23370.t1		Group Ⅰ	Phyllostachys edulis	359	MQPDATSTSHRIARVEAHLNPPRPQMEEGSASALRPAACRAKGGAPGFKVAVLGAAGGIGQPLSLLMKMNPLVSVLHLYDVVNTPGVTADVSHMDTSAVVRGFLGPKQLEAALTGMDLVIIPAGLPRKPGMTRDDLFNKNAGIVRTLCEGVAKCCPNAIVNLISNPVNSTVPIAADVFKKAGTYCPKRLLGVTTLDVVRANTFVAEVLGIDPRDVRVPVVGGHAGVTILPLLSQVSPPCSFTPDEMSYLTNRIQNGGTEVVEAKAGSGSATLSMAFAAAKFADACLRGMRGDAGIVECSFVASEVTELPFFATKVRLGRGGAEEVLPLGPLNDFERAGLEMAKKELMESIQKGIDFMNK
PH02Gene13436.t1		Group Ⅰ	Phyllostachys edulis	358	MQPDATSPSHRIASVAAHLNPPRPQMEESASALRPAACRAKGGAPGFKVAVLGAAGGIGQPLSLLMKMNPLVSVLHLYDVVNTPGVTADVSHMDTSAVVRGFLGPKQLEAALTGMDLVVIPAGLPRKPGMTRDDLFNKNAGIVRTLCEGVTKCCPNAIVNLISNPVNSTVPIAAEVFKKAGTYNPKRLLGVTTLDVVRANTFVAEVLGIDPRDVSVPVVGGHAGVTILPLLSQVNPPCSFTPDEISYLTNRIQNGGTEVVEAKAGSGSATLSMAFSAAKFADACLRGMRGDAGIVECSFVASEVTELPFFATKVRLGRGGAEEILPLGLLNDFERAGLEKAKKELGESIEKGISFMNK
PH02Gene04191.t1		Group Ⅱ	Phyllostachys edulis	344	MRPSLLKSASQLLRRGRRDYSSVAAAGQPERKVAILGAAGGIGQPLALLMKLNPLVSSLSLYDVAATPGVAADVSHINTLALVKGFVGDDQLGEALEGLDVVIIPAGVPRKPGMTRDDLFNINAGIVKALCTAIAKYCPNALVNIISNPVNSTVPIAAEVFKKAGTYDEKKLFGVTTLDVVRAKTFYAAKANVPVTEVNVPVVGGHAGVTILPLFSQATPASNALSHEDTKALTKRTQDGGTEVVEAKAGKGSATLSMAYAGAVFADACLKGLNGVPDIVECSFVQSTVTELPFFASKVRLGKNGVEEVLGLGELSAVEEGGLENLKGELKSSIEKGIKFAQEN
PH02Gene27517.t1		Group Ⅰ	Phyllostachys edulis	397	MASTVTISSVSAQAGLISKPRNHGITSYSGLKAAASISFESGSSFLGRNTSLRASVAPRIVPKAKYGSQISPEASYKVAVLGAAGGIGQPLSLLIKMSPLVSALHLYDIANVKGVAADLSHCNTPSQVLDFTGPAELANCLKGVDVVVIPAGVPRKPGMTRDDLFNINAGIVKSLVEAVADNCPEAFIHIISNPVNSTVPIAAEVLKQKGVYNPKRLFGVTTLDVVRANTFVAQKKNLKLIDVDVPVVGGHAGITILPLLSKTRPSVTLTDEETEELTKRIQNAGTEVVEAKAGAGSATLSMAYAAARFVESSLRALAGDPDVYECTFVQSELTELPFFASRVKLGKNGVESIISADHEGVTEYEAKALEALKSELKASIEKGITFAHKQQAAPASV
PH02Gene08167.t1		Group Ⅰ	Phyllostachys edulis	397	MASTVTISSVSAQAGLISKPRNHGITSYSGLKAAASISFESGSSFLGRNTSLRASVAPRIVPKAKYGSQISPEASYKVAVLGAAGGIGQPLSLLIKMSPLVSALHLYDIANVKGVAADLSHCNTPSQVLDFTGPAELANCLKVVDVVVIPAGVPRKPGMTRDDLFNINAGIVKSLVEAVADNCPEAFIHIISNPVNSTVPIAAEVLKQKGVYNPKRLFGVTTLDVVRANTFVAQKKNLKLIDVDVPVVGGHAGITILPLLSKTRPSVTLTDEETEELTKRIQNAGTEVVEAKAGAGSATLSMAYAAARFVESSLRALAGDPDVYECTFVQSELTELPFFASRVKLGKNGVESIISADHEGVTEYEAKALEALKSELKASIEKGITFAHKQQAAPASV
PH02Gene01969.t1		Group Ⅲ	Phyllostachys edulis	317	MIARGLMLGPDQPVVLHMLDLQRAADALNGVRMELVDAASPLLRGVVATSDETEAFRGVNVDILIGGFPRKEGMERKDLITKNVPIYKSHASALQQHAAPNCKAVVVANSANTNAPVLKEFAPAIPAKNVTCLTRLDHNRALGQVSEKLNAHVGDVENAIIWGNHSSTQFPDVSHATAKTELGEKPVKELIADEKWQLTIFLNPQLIEEFVSTVQQRGAAVIKARKQSSSLSTASAACDHMRDWILGTPEGTWVSMGLYSDGSYDVPEGLFYSFPVTCEKGEWSIVQDLQLDDFARTKMEASANELKEEKSIAYAYI
PH02Gene18021.t3		Group Ⅰ	Phyllostachys edulis	381	MEQAGDAAARRMARLASHLQPPTSQMEEVSLLRGSNCRAKGAAPGFKVAILGASGGIGQPLALLMKMNPLVSVLHLYDVVNTPGVTADISHMNTGAVVRGFLGQPQLEHALTGMDLVIIPAGVPRKPGMTRDDLFNINAGIARTLCEGIAKCCPNAIVNVISNPVNSTVPIAAEVFKKAGSYDPKRLLGVTTLDVVRANTFVGEVLGLDPRDVNVPVVGGHAGVTILPLLSQVHPPCSFTSEEISYLTSRIQNGGTEVVEAKAGAGSATLSMAYAAAKFADACLRGLRGDAGIVECSYVASQVTELPFFASKVRLGRCGIEEILPLGPLNEFERSVIEFTAILVLGMHFCHTHSIIQHQLHTCHMLSSEVDPDNLFCSSYH
PH02Gene18183.t1		Group Ⅰ	Phyllostachys edulis	404	MAAAAISTLSLCSAPQSKQLRLGASTFTAEHFSGCNSLRPASSMSCFLAQASSSNSHWHSAQLRSRGPRLRAGNRVVAQAGSYKAAILGAAGGIGQPLSLLIKMSPLVSALHLYDIANVKGVSADVNHCNTPAQVVGFTGREELAGSLAGVDVVVIPAGVPRKPGMTWDDLFSINAGIVKELVEAVADNAPGALIHIITNPVNSTVPIAAEVLKQKGVYDPRKLFGLTTLDVVRANTFVAEKKSLPLADVDVPVVGGHAGITILPLLSKVRPKTSFTDEEVEELTVKIQNADTEVVEAKVGDGSATLSMAYAAARFVEASLRGLDGDCDVYECAYVQSQVTELTFFASRVKLGKEGVEEVIGSELKGLTDYEARALEALKPQLKASIEKGVAYAQQQPM…
PH02Gene36556.t1		Group Ⅲ	Phyllostachys edulis	353	MKKASSLSELGFDASGASSGFFRPVADCPCTPTSHGRRLTKISVIGAGNVGMAIAQTILTRDLADEIALVDALPDKLRGEMLDLQHAAAFLPRVRLVADTDLAVTKGSDLAIVTAGARQIPGETRLNLLQRNVALFRKIVPALAERSPEALLLIVSNPVDVLTYVAWKLSGFPANRVVGSGTNLDSSRFRFLLAEHLDVNAQDVQAYMVGEHGDSSVAIWSSITVGGMPVLKSLQESHRCFDEETLEGIRRAVVDSAYEVISLKGYTSWAIGYSVASLVSSLLRDQRRIHPVSVLASGFHGISDDHEVFLSLPARLGRAGVLGVAEMELTEEEAKSLRRSAKTLWENCQLLGL
PH02Gene05691.t1		Group Ⅲ	Phyllostachys edulis	353	MKKASSLSELGFDASDASSGFFRPVAGCPSTPTSHRRRLTKISVIGAGNVGMAIAQTILTRDLADEIALVDALPDKLRGEMLDLQHAAAFLPRVRLVSDTDLAVTKGSDLAIVTAGARQIPGETRLNLLQRNVSLFRKIVPALAEHSPEALLLIVSNPVDVLTYVAWKLSGFPASRVIGSGTNLDSSRFRFLLAEHLDVNAQDVQAYMVGEHGDSSVAIWSSISVGGMPVLKSLQESHRCFDEEALEGIRQAVVHSAYEVISLKGYTSWAIGYSVASLVSSLLRDQRRIHPVSVLAKGFHGISDDHEVFLSLPARLGRAGVLGAAEMELTEEEARRLRRSAKTLWENCQLLGL
PH02Gene31806.t1		Group Ⅲ	Phyllostachys edulis	365	MKKASSLSELGFGADGSATALFRQVPSSDCDGRAPATPRRRLIKVSVIGAGNVGMAIAQTILTQELADEIALVDAVADKVRGEMLDLQHAAAFLPRVRIVSGTDLGLTRRSDLVIVTAGARQIPGETRLDLLQRNVALFRKIVPAVAEGSPESLLLIVSNPVDVLTYVAWKLSGFPASRVVGSGTNLDSSRFRFLLAEHLEVNAQDVQAYMVGEHGDSSVALWSSISVGGMPVLSYLQKNHRSSSSSLTSFDEEALEDIRRAVVDSAYEVIGLKGYTSWAIGYSVASLAWSLLRDQRRIHPVSVLAKGLVRGVPGDHEVFLSLPTRLGRGGVLGVAAELELTDDEERMLRRSAETLWGYCQALRL
PH02Gene20071.t1		Group Ⅲ	Phyllostachys edulis	364	MKKASSLSELGFDADGSATALFRQVPSSDCDGRAPATPRRRLIKVSVIGAGNVGMAIAQTILTQDLADEIALVDAVADKVRGEMLDLQHAAAFLPRVRIVSGTDLALTRGSDLVIVTAGARQIPGETRLDLLQRNVVLFRKIVPAVAEGSPESLLLIVSNPVDVLTYVAWKLSGFPASRVIGSGTSLDSSRFRFLLAEHLAVNAQDVQAYMVGEHGDSSVALWSSISVGGMPALSYLQKNHRSSSSTTLFDEEALEDIRRVVVDSANKVIELKGYTSWAIGYSVASLARSLLRDQRRIHPVSVLVKGLVRGVPGDHEVFLSLPARLGRGGVLGVVSELELTDYEERMLRWSAETLWGYCQALGL
PH02Gene04577.t1		Group Ⅰ	Phyllostachys edulis	150	MSPLVSALHLYLYDIANAKGVAADLSHCNTPSQVLDFTGPSELANCLKGVDVVIIPTGVPRKPGMTREDLFNINASIVKSLVEAVADNCPKALSILSATQVKLGKNGVESISADLEGVTEYEAKALEALKPELKASIEFAHKQQAAAASV
KAI3441486.1		Group Ⅱ	Psidium guajava	348	MRTAMLRSLRSAVARSAPSNSHLRRRGFSSESAPERKVAVLGAAGGIGQPLALLMKINPLVSKLSLYDIAGTPGVAADVSHINSRSEVTGYAGEDQLGQALEGADLVIIPAGVPRKPGMTRDDLFNINAGIVKSLSTAVAKYCPNAIVNMISNPVNSTVPIAAEVFKKAGTYDERKLFGVTTLDVVRAMTFYAGKANVPVTGVNVPVVGGHAGITILPLFSQASPQANLPEDVIKALTKRTQDGGTEVVEAKAGKGSATLSMAYAGAVFADACLKGLNGVPDVVQCSFVQSSVTELPFFASKVILGKNGVEKVLDLGPLSDYEQEGLEKLKPELKASIEKGIKFANEN
KAI3416650.1		Group Ⅲ	Psidium guajava	438	MAVAELTTPTCTKQGLRSSEAFYLSARTSSFRRPSFRPLRRTHSSRISCSVNQTAQAPVAVQTKEPKSNKPECFGVFCLTYDLKAEEETKSWKKLINIAVSGAAGMISNHLLFKLASGQVFGPDQPIALKLLGSERSFQALEGVAMELEDSLFPLLREVQIGIDPYEVFQDVEWALLIGAKPRGPGMERAGLLDINGQIFAEQGKALNAVASPNVKVIVVGNPCNTNALICLKNAPNIPARNFHALTRLDENRAKCQLALKAGVFYDKVSNVTIWGNHSTTQVPDFLNAKIIGLPVKEVITDHKWLEEEFTEKVQKRGGVLIEKWGRSSAASTAVSIADAIKSLVTPTPEGDWFSSGVYTDGNPYGIAEGIVFSMPCRSKGDGDYELAKDVIFDNYLLK…
KAI3420757.1		Group Ⅲ	Psidium guajava	364	MDYTKLFEKAVVVSFSVSLFSKIIRHMWSSMDAEKEPVKVLVTGAAGQIGYALLPMIARGVMLGPDQPVIIQMLDIEQSAKALDGMKMELIDGAFPLLRGVVATTDADEACRDVNIAVMLGGIPRKEGMERKDVMSRNVSIYKAQALALEQHAAADCKVLVVANPANTNALILKEFAPSIPDKNITCLTRLDHNRALGQIAEKLKVHVSDVKNIIIWGNHSSTQYPDVNHATVATSSGERSVRNLIADDKWLNTEFITTIQQRGAAIIKARKLSSALSAASAACDHIRDWVRGTPKGTWVSMGVCSDGSYGIQPGLIYSFPVTCQNGEWSIVQGLKIDEFSRAKMDATANELIEEKSLAFSCLG
KAI3442094.1		Group Ⅲ	Psidium guajava	332	MAKEPVRVLVTGAAGQIGYALVPMIARGVMLGPDQPVILHMLDIPPAAEALNGVKMELVDAAFPLLKGVVATTDVVEACTGVNVAIMVGGFPRKEGMERKDVMTKNVSIYKSQASALEKHAAANCKVVVVANPANTNALILKEFAPSIPEKNITCLTRLDHNRALGQIAEKLKVQVSDVKNAIIWGNHSSTQYPDVNHATVKTPSGEKPVRELVKDDAWLNGEFITTVQQRGAAIIKARKLSSALSAASGACDHIHDWVLGTPAGTWVSMGVYSDGSYNVPAGLIYSFPVTCCNGEWTIVQGLPIDEFSRKKMDATAEELSEEKALAYSCLS
KAI3423145.1		Group Ⅰ	Psidium guajava	360	MQPTSEANQRIARISAHLHPPNFGVTLLMEDSSGLRRANCRAKGAAPGFKVAILGAAGGIGQPLAMLMKINPLVSVLHLYDVVNTPGVTADISHMDTGAVVRGFLGQRQLEEALVGMDLVIIPAGVPRKPGMTRDDLFKINAGIVRTLCEGIAKCCPNAIVNLISNPVNSTVPIAAEVFKSAGTYDPKRLLGVTMLDVVRANTFVAEVLGLDPREVDVPVVGGHAGVTILPLLSQVKPPCSFTPQEIDYLTSRIQNGGTEVVEAKAGAGSATLSMAYAAVKFADACLRGLRGDAGIVECAFVSSQVTELPFFASKVRLGRTGAEEVLPLGPLNEYERAGLEKAKKELAESIQKGVSFIKK
KAI3440601.1		Group Ⅰ	Psidium guajava	412	MAAPAAASMSIGSTISFGSKTGPFPHSKPFGVKISSQNSFASFSGLKAAKSVSCEADSSFLGKETTSALRQPFALKAQKQNQNFQYQLQPQASYKVTVLGAAGGIGQPLALLVKMSPLVSALHLYDIANVKGVAADLSHCNTPSQVLDFTGASELANSLKGANVVVIPAGVPRKPGMTRDDLFNINANIVKTLVEAVADNCADAFIHIISNPVNSTVPIAAEVLKQKGVYDPKKLFGVTTLDVVRANTFVAQKKNLKLIDVDVPVVGGHAGITILPLLSKTKPSVSFTDEEVEQLTVRIQNAGTEVVEAKAGAGSATLSMAYAAARFVESSLRALDGDGDVYECAFVQSDLTDLPFFASRVKLGKKGVEALIPSDLQGLTEYEQKALEALKPELKASIE…
KAI3429911.1		Group Ⅰ	Psidium guajava	413	MASTLAATLSIGSTLSFGHKSCSLAQPKPFGLRLTSCASLASFSGLRATTTSVICEAESSFLGKESGVALQHSVARKAQKQSQRLQYHLQPQASFKVAILGAAGGIGQPLSLLIKMSPLVSALHLYDIANVKGVAADLSHCNTPPQVLDFTGASELPKSLKGVNVVVIPAGVPRKPGMTRDDLFNINANIVKSMVEAVADNCPDAFIHIISNPVNSTVPIAAELLKQKGVYDPKKLFGITTLDVVRANTFVAQKKNLKLIDVDVPVVGGHAGITILPLLSKMRPSVSFTDEEVEELTLRIQDAGTEVVEAKAGAGSATLSMAYAAARFVESSLRALDGDGDVYECSFVQSDLTELPFFASRVKLGRKGIEALIPSDLQGLTEYEQKALDALKPELKASI…
KAI3409648.1		Group Ⅲ	Psidium guajava	352	MHKAPSASSLGPGGLDLTNAFFKPIQNTAPPSPTKRHTKIAVVGVGNVGMAIAQTILTQDLADELALIDAKPDKLRGEMLDLQHAAAFLPRTKISASVDYSVAAGSDLCIVTAGARQIAGESRLNLLQRNVALFRAIVPKLARYAPESTLLIVSNPVDVLTYVAWKLSGFPSNRVVGSGTNLDSSRFRFLIADHLDVNAQDVQAYIVGEHGDSSVALWSSISVGGVPVLSFLEKQQIAYEKETLEKIHKEVVDCAYEVISLKGYTSWAIGYSVASLARALLRDQRRIHPVSVLARGFFGIEGGDVFLSLPAQLGRGGVLGVTNVHLTEEEAERLRESARTILEVQSQLDLGI
KAI3427606.1		Group Ⅱ	Psidium guajava	124	MISNPVNSTVPIAAEVFKKAGTYDEKKLFGVTTLDVVRAKPFYAGKAKFPVEEVNVPVVGVMQALQSSLCFLKPYLGPIWRTKISRHSPSVLKMEGRKLWKQRPERDLQHCPWRMLEHYLQMLA
GWHGDVFZ052220		Group Ⅰ	Syzygium samarangense	288	MKVAVLGAAGGIGQALALLLKTQLPAGSELSLYDIAPVTPGVAVDLSHIPTAVNVKGFSGEDATPALKGADVVLISAGVARCYDSAESVNWVITNPVNTTVAIAAEVLKKHGVYDKNRLFGVTTLDIIRANTFVAELKGKQPGEVNVPVVGGHSGVTILPLLSQVAGVSFSDQEVADLTKRIQNAGTEVVEAKAGGGSATLSMGQAAARFGLSLVRALNGEANVVECAYVEGDGEHARFFSQPLLLGKNGVAERKPVGALSPFEQQALDGMLETLKKDIAQGEAFVKQ
GWHGDVFZ003573		Group Ⅱ	Syzygium samarangense	348	MRSAVLRSLRSAAARPAAANSHLLRRGFSSESVPERKVAVLGAAGGIGQPLSLLMKINPLVSKLALYDIAGTPGVAADVSHINTRSEVAGYAGEDQLGQALEGADLVIIPAGVPRKPGMTRDDLFNINAGIVKSLCTAIAKYCPNAIVNMISNPVNSTVPIAAEVFKKAGTYDERKLFGVTTLDVVRAKTFYAGKANVPVAGVNVPVVGGHAGITILPLFSQASPQANLPEDVIKALTKRTQDGGTEVVEAKAGKGSATLSMAYAGAVFADACLEGLNGVPDVVQCSFVQSSVTELPFFASKVILGKNGVEKVLDLGPLSDYEQEGLEKLKPELKASIEKGIKFANEN
GWHGDVFZ003585		Group Ⅱ	Syzygium samarangense	348	MRSAVLRSLRSAAARPAAANSHLLRRGFSSESVPERKVAVLGAAGGIGQPLSLLMKINPLVSKLALYDIAGTPGVAADVSHINTRSEVAGYAGEDQLGQALEGADLVIIPAGVPRKPGMTRDDLFNINAGIVKSLCTAIAKYCPNAIVNMISNPVNSTVPIAAEVFKKAGTYDERKLFGVTTLDVVRAKTFYAGKANVPVAGVNVPVVGGHAGITILPLFSQASPQANLPEDVIKALTKRTQDGGTEVVEAKAGKGSATLSMAYAGAVFADACLEGLNGVPDVVQCSFVQSSVTELPFFASKVILGKNGVEKVLDLGPLSDYEQEGLEKLKPELKASIEKGIKFANEN
GWHGDVFZ005898		Group Ⅱ	Syzygium samarangense	348	MRSAVLRSLRSAAARPAAANSHLLRRGFSSESVPERKVAVLGAAGGIGQPLSLLMKINPLVSKLVLYDIAGTPGVAADVSHINTRSEVAGYAGEDQLGQALEGADLVIIPAGVPRKPGMTRDDLFNINAGIVKSLCTAIAKYCPNAIVNMISNPVNSTVPIAAEVFKKAGTYDERKLFGVTTLDVVRAKTFYAGKANVPVAGVNVPVVGGHAGITILPLFSQASPQANLPEDVIKALTKRTQDGGTEVVEAKAGKGSATLSMAYAGAVFADACLEGLNGVPDVVQCSFVQSSVTELPFFASKVILGKNGVEKVLDLGPLSDYEQEGLEKLKPELKASIEKGIKFANEN
GWHGDVFZ000422		Group Ⅱ	Syzygium samarangense	347	MRTSMVRLIRSRSSSAAPSQPRLPRRAYSSESVPERKVAVLGAAGGIGQPLALLMKLNPLVSHLSLYDIAGTPGVAADVSHVNTRSEVAGYTGEEQLGQALEGSDVVIIPAGVPRKPGMTRDDLFNINAGIVKSLCTAIAKYCPHAIVNMISNPVNSTVPIAAEVFKKAGTYDEKKLCGVTTLDVVRAKTFYAGKAKVPVGEVNVPVVGGHAGITILPLFSQAVPKANLADEDIKALTKRTQDGGTEVVEAKAGKGSATLSMAYAGALFADACLKGLNGVPDVVECSFVQSSITELPFFASKVKLGKNGVEEVLELGPMSDFEKQGLESLIPELKSSIEKGIKFANQ
GWHGDVFZ006533		Group Ⅱ	Syzygium samarangense	347	MRTSMLRLIRSRSSSAAPSQPRLLRRAYSSESVPERKVAVLGAAGGIGQPLALLMKLNPLVSHLSLYDIAGTPGVAADVSHVNTRSEVAGYTGEEQLGQALEGSDVVIIPAGVPRKPGMTRDDLFNINAGIVKSLCTAIAKYCPHAIVNMISNPVNSTVPIAAEVFKKAGTYDEKKLCGVTTLDVVRAKTFYAGKAKVPVGEVNVPVVGGHAGITILPLFSQAVPKANLADEDIKALTKRTQDGGTEVVEAKAGKGSATLSMAYAGALFADACLKGLNGVPDVVECSFVQSSITELPFFASKVKLGKNGVEEVLELGPMSDFEKQGLESLIPELKSSIEKGIKFANQ
GWHGDVFZ046671		Group Ⅲ	Syzygium samarangense	960	MTKGYDLAFVPPLQENGEVVVEITPEVAAEQNPFWVECIVGHYIGKKIPFKLTEEAFKKAWGEHVIDVKLHENGFYFFRVPNEEFRKKIIEKGPVSIFSSTMLLQQWHPKLKLKKGAMDSIPVWVRLRDLPFSLWSSAGISRIASAVGKPLYVDTQTEHMTRISYARVCIEIKAATPRLEMVKVRWDGEVHLVHIEYEWKPSVCLSCGLFGHKEGSAGFGCHTKQPEKQPEPSRPPASDGWTQVYRKKHNAHPATSPVQQTPPSGHDTAEGSTMAHELEEPLPLAPGADAPVVVNSNMAQNVDPQARSSPSPAPIASGSLSQQNMAQNMDPQARSSPSPAPIASGSLYQSPVNSTSSTEHSSSLDKAGASDGSRDLGFSRFFFRTNSFKVFGFSMKGDG…
GWHGDVFZ010535		Group Ⅲ	Syzygium samarangense	332	MAKEPVRVLVTGAAGQIGYALVPMIARGVMLGPDQPVILHMLDIPPAAEALNGVKMELIDAAFPLLKGVVATTDVVEACTGVGVAVMVGGFPRKEGMERKDVMTKNVSIYKSQASALEKHAAANCKVLVVANPANTNALILKEFAPSIPEKNITCLTRLDHNRALGQISERLSVQVSDVKNAIIWGNHSSSQYPDVNHATVNTPSGEKPVRELIKDDAWLNGEFIATVQQRGAAIIKARKLSSALSAASSACDHIRDWVLGTPEGTWVSMGVYSDGSYNVPAGLIYSFPVTCRNGEWTIVQGLPIDEFSRKKMDATADELSEEKALAYSCLS
GWHGDVFZ030324		Group Ⅰ	Syzygium samarangense	468	MHERRCTNDGGGLRALGDWSSSSLPRARWSFVEAGSPAEKTNETTDPSAKKQPKCKMAASSASSMSIGSTVSFGNKTGPFPQSKPFEVKISSQNSFTSFSGLKAAKFASYEADSSFLGGETTSALRQSFAPKAQKQNQNFQYQLQPQASYKVTVLGAAGGIGQPLALLIKMSPLVSALHLYDIANVKGVAADLSHCNTPSQVLDFTGASELAESLKGAKVVVIPAGVPRKPGMTRDDLFNINANIVKTLVEAVADNCPDAFIHIISNPVNSTVPIAAEVLKQKGVYDPKKLFGVTTLDVVRANTFVAQKKNLKLIDVDVPVVGGHAGITILPLLSKTKPSVSFTDEEVEKLTVRIQNAGTEVVEAKAGAGSATLSMAYAAARFVESSLRALDGDGDVYE…
GWHGDVFZ011239		Group Ⅰ	Syzygium samarangense	421	MQPASEANQRIARISAHLHPPNFQMEESSGLRRANCRAKGAAPGFKVAILGASGGIGQPLAMLMKINPLVSVLHLYDVVNTPGVTADISHMDTGAVVRGFLGQQQLEEALVGMDLVIIPAGVPRKPGMTRDDLFKINAGIVRTLCEGIAKCCPKAIVNLISNPVNSTVPIAAEVFKRAGTYDPKRLLGVTMLDVVRANTFVAEVLGLDPREVDVPVVGGHAGVTILPLLSQVKPPCSFTPQEIDYLTSRIQNGGTEVVEAKAGAGSATLSMAYAAVKFADACLRGLRGDAGIVECAFVASQVTELPFFASKVRLGRTGAEEVRPLGPLNEYERAGLEKAKKELAESIQKGISFIKKYGKLIKLIVQELLLKLNGKNRPLPDHLVERDNLECIEELLDVD…
GWHGDVFZ019750		Group Ⅲ	Syzygium samarangense	364	MDYGKLFEKAVVVSFSVSLFWKIIRHMWSLMNVEKEPVKVLVTGAAGQIGYALLPMIARGVMLGPGQPVIIHMLDIEEAAEALNGVKMELIDGAFPLLKGVVATTDVIEACRDVNIAVMLGGMPRKEGMERKDVMSRNASIYKAQASALEQHAADDCKVLVVANPANTNALVLKEFAPSIPEKNITCLTRLDHNRALGQIAEKLKVHVSDVKNVIIWGNHSSTQYPDVNHATVATSSGQRSVRDVIANDKWLNTEFITTVKQRGAAVIKARKLSSALSAAGAACDHIRDWVLGTPKGSWVSMGVCSDGSYETQPGLFYSFPVTCENGEWSIVRELKIDEFSRAKMDATANELIEEKSLVYSCLG
GWHGDVFZ019758		Group Ⅲ	Syzygium samarangense	364	MDYGKLFEKAVVVSFSVSLFWKIIRHMWSLMNVEKEPVKVLVTGAAGQIGYALLPMIARGVMLGPGQPVIIHMLDIEEAAEALNGVKMELIDGAFPLLKGVVATTDVIEACRDVNIAVMLGGMPRKEGMERKDVMSRNASIYKAQASALEQHAADDCKVLVVANPANTNALVLKEFAPSIPEKNITCLTRLDHNRALGQIAEKLKVHVSDVKNVIIWGTHSSTQYPDVNHATVATSSGQRSVRDVIANDKWLNTEFITTVQQRGAAVIKARKLSSALSAAGAACDHIRDWVLGTPKGSWVSMGVCSDGSYETQPGLFYSFPVTCENGEWSIVRELKIDEFSRAKMDATANELIEEKSLVYSCLG
GWHGDVFZ007878		Group Ⅰ	Syzygium samarangense	411	MASTSASTLSIGSTLSFGHKCGSLAQPKPFGVRLASHASLASFSGLKATTSVSCEAESSFLGKESGVALQCSVARKSQKRSQRLQYHLQPRASFKVAILGAAGGIGQPLSLLIKMSPLVSALHLYDIANVKGVAADLSHCNTPSQVLDFTGASELPNSLKGVNVVVIPAGVPRKPGMTRDDLFNINANIVKSLVEAVADNCPDAFIHIISNPVNSTMPIAAEVLKQKGVYDPKKLFGVTTLDVVRANTFVAQKKNLKLIDVDVPVVGGHAGITILPLLSKTRPSVSFTDAEVEELTLRIQNAGTEVVEATGAGSATLSMAYAAARFVESSLRALDGDGDVYECSFVQSDLTELPFFASRVKLGRKGIEALIPSDLQGLTEYEQKTLDALKPELKASIEK…
GWHGDVFZ007900		Group Ⅰ	Syzygium samarangense	411	MASTSASTLSIGSTLSFGHKCGSLAQPKPFGVRLASHASLASFSGLKATTSVSCEAESSFLGKESGVALQCSVARKSQKRSQRLQYHLQPRASFKVAILGAAGGIGQPLSLLIKMSPLVSALHLYDIANVKGVAADLSHCNTPSQVLDFTGASELPNSLKGVNVVVIPAGVPRKPGMTRDDLFNINANIVKSLVEAVADNCPDAFIHIISNPVNSTMPIAAEVLKQKGVYDPKKLFGVTTLDVVRANTFVAQKKNLKLIDVDVPVVGGHAGITILPLLSKTRPSVSFTDAEVEELTLRIQNAGTEVVEATGAGSATLSMAYAAARFVESSLRALDGDGDVYECSFVQSDLTELPFFASRVKLGRKGIEALIPSDLQGLTEYEQKTLDALKPELKASIEK…
GWHGDVFZ008883		Group Ⅰ	Syzygium samarangense	411	MASTSASTLSIGSTLSFGHKCGSLAQPKPFGVRLASHASLASFSGLKATTSVSCEAESSFLGKESGVALQCSVARKSQKRSQRLQYHLQPRASFKVAILGAAGGIGQPLSLLIKMSPLVSALHLYDIANVKGVAADLSHCNTPSQVLDFTGASELPNSLKGVNVVVIPAGVPRKPGMTRDDLFNINANIVKSLVEAVADNCPDAFIHIISNPVNSTMPIAAEVLKQKGVYDPKKLFGVTTLDVVRANTFVAQKKNLKLIDVDVPVVGGHAGITILPLLSKTRPSVSFTDAEVEELTLRIQNAGTEVVEATGAGSATLSMAYAAARFVESSLRALDGDGDVYECSFVQSDLTELPFFASRVKLGRKGIEALIPSDLQGLTEYEQKTLDALKPELKASIEK…
GWHGDVFZ019751		Group Ⅲ	Syzygium samarangense	337	MDYGKLFEKAVVVSFSVSLFWKIIRHMWSLMNVEKEPVKVLVTGAAGQIGYALLPMIARGVMLGPGQPVIIHMLDIEEAAEALNGVKMELIDGAFPLLKGVVATTDVIEACRDVNIAVMLGGMPRKEGMERKDVMSRNASIYKAQASALEQHAADDCKVLVVANPANTNALVLKEFAPSIPEKNITCLTRLDHNRALGQIAEKLKVHVSDVKNVIIWGNHSSTQYPDVNHATVATSSGQRSVRDVIANDKWLNTEFITTVKQRGAAVIKARKLSSALSAAGAACDHIRDWVLGTPKGSWVSMGVCSDGSYETQPGLFYSFPVTCENGEWSIVREISS
GWHGDVFZ019772		Group Ⅲ	Syzygium samarangense	337	MDYGKLFEKAVVVSFSVSLFWKIIRHMWSLMNVEKEPVKVLVTGAAGQIGYALLPMIARGVMLGPGQPVIIHMLDIEEAAEALNGVKMELIDGAFPLLKGVVATTDVIEACRDVNIAVMLGGMPRKEGMERKDVMSRNASIYKAQASALEQHAADDCKVLVVANPANTNALVLKEFAPSIPEKNITCLTRLDHNRALGQIAEKLKVHVSDVKNVIIWGNHSSTQYPDVNHATVATSSGQRSVRDVIANDKWLNTEFITTVKQRGAAVIKARKLSSALSAAGAACDHIRDWVLGTPKGSWVSMGVCSDGSYETQPGLFYSFPVTCENGEWSIVREISS
GWHGDVFZ028328		Group Ⅲ	Syzygium samarangense	351	MHKTYSASSLGPGGLDLSQAFFRPIHNTAPPSPTNRHTKITVVGAGNVGMAIAQTVLTQDLVDEIALIDAMPDKLRGEMLDLQHAAAFLPRTTILASSSDYTVTSGSDLIVVTAGARQIPGESRLNLLQRNVALFRKIIPEVAKHSPDAILMVVSNPVDILTYVAWKMSGFPSNRVIGSGTNLDSSRFRFLLADHLQVNAQDVQAYVVGEHGDSSVALWSSISVGGVPILSFLERQQIPYEEEMLENIRKTVVDGAYEVISLKGYTSWAIGYSVANLARTILRDQRRIHPVSVLAKGFYGIDGGDVFLSLPVQLSRAGVVGVTNVHMTDMEVQRLRASGETLLELQSQLGI
GWHGDVFZ015749		Group Ⅲ	Syzygium samarangense	352	MHRAPSASSLGPGGLDLSGAFFRPIQNTAPPSTTKRHTKIAVVGVGNVGMAIAQTILTQDLADELALIDAKPDKLRGEMLDLQHAAAFLPRTRISASVDYAVAAGSDLCIVTAGARQIAGESRLNLLQRNVALFRTIVPALARHAPDSILLIVSNPVDVLTYVAWKLSGFPSNRVVGSGTNLDSSRFRFLIADHLDVNAQDVQAYIVGEHGDSSVALWSSISVGGVPVLSFLEKQQIPYEKETLENIHKAVIDCAYEVISLKGYTSWAIGYSVASLARTLLRDQRRIHPVSVLARGFFGIEGGDVFLSLPAQLGRGGVLGVTNVHLTEEEARRLRESAATILEVQGQLDLGI
GWHGDVFZ019460		Group Ⅲ	Syzygium samarangense	352	MHRAPSASSLGPGGLDLSGAFFRPIQNTAPPSPTKRHTKIAVVGVGNVGMAIAQTILTQDLADELALIDAKPDKLRGEMLDLQHAAAFLPRTRISASVDYAVAAGSDLCIVTAGARQIAGESRLNLLQRNVALFRAIVPALARHAPDSILLIVSNPVDVLTYVAWKLSGFPSNRVVGSGTNLDSSRFRFLIADHLDVNAQDVQAYIVGEHGDSSVALWSSISVGGVPVLSFLEKQQIPYEKETLENIHKAVIDCAYEVISLKGYTSWAIGYSVASLARTLLRDQRRIHPVSVLARGFFGIEGGDVFLSLPAQLGRGGVLGVTNVHLTEEEARRLRESAATILEVQGQLDLGI
GWHGDVFZ012222		Group Ⅲ	Syzygium samarangense	365	MSEPPNSVALLFEIWDSSMARQEAVRVLVTEAGGPIAQDLVYLIARGAMLGYDQPVILHLFHSATNVEALEDLEIALMDSALPLLEGVVVTNNVEQACKGVGFAILIGEFLRKPITFRLEAMANSFGIYKRQVDALEKHAAANCKVLVIANPADRLALVLKEFAPSIPLDNITCLTRPDHNRALSRISRRLNVPAYAVKNVIIWGNHSSTQYPDVNHAMVNTSSGEYLVRELINDDAWWNDGGFITDFQECTAEITQPPWDLRARSIAQGACDHIHDWVLGTPEGRWVSMGVYSDGSYNVPVGLIYSFPVTCRNGEWTIVQGLPLDEFSRKKMDSTVKELMEQRMLNVDALLHCIWRRRSFYFPI
GWHGDVFZ010495		Group Ⅲ	Syzygium samarangense	361	MSEPPNSVALLFEIWDSSMARQEAVRVLVTEAGGPIAQDLVYLIARGAMLGYDQPVILHLFHSATNVEALEDLEIALMDSVLPLLEGVVVTNNVEQACKGVGFAILIGEFLRKPITFRLEAMANSFGIYKRQVDALEKHAAANCKVLVIANPADRLAFVLKEFAPSIPLDNITCLTRPDHNWALSRISQRLNVPAYVVKNVIIWGNHSSTQYPDVNHAMVNTSSGEYLVRELINDDAWWNDGGFITDFQERTAEITQSPWDLRARSIAQGACDHIHDWVLGTPEGRWVSMGVYSDGSYNVPFGLIYSFPVTCRSGEWTIVQGLPLDEFSRKKMDSTVKELREQHMLNVDSLLHFIRRRRIA
GWHGDVFZ010499		Group Ⅲ	Syzygium samarangense	361	MSEPPNSVALLFEIWDSSMARQEAVRVLVTEAGGPIAQDLVYLIARGAMLGYDQPVILHLFHSATNVEALEDLEIALMDSVLPLLEGVVVTNNVEQACKGVGFAILIGEFLRKPITFRLEAMANSFGIYKRQVDALEKHAAANCKVLVIANPADRLAFVLKEFAPSIPLDNITCLTRPDHNWALSRISQRLNVPAYVVKNVIIWGNHSSTQYPDVNHAMVNTSSGEYLVRELINDDAWWNDGGFITDFQERTAEITQSPWDLRARSIAQGACDHIHDWVLGTPEGRWVSMGVYSDGSYNVPFGLIYSFPVTCRSGEWTIVQGLPLDEFSRKKMDSTVKELREQHMLNVDSLLHFIRRRRIA
GWHGDVFZ011526		Group Ⅲ	Syzygium samarangense	301	MTIIPLGPIAEDLVELIARGLMLGYDQPVILHLLYHETNVPALKALETVLIDSVLPLLEGLAITSEVEQACKGVGFAILIGEITERKRILMNSFGRYKRQALALQKHAAANCKVLVIANPADKLALVLKEFAPSIPLKNITCLTRHDHNRALSQTSQRLNVRAGDVKNVIIWGNHSSTQYPDVKHATVNTPFGEYLVRELINDNGWLNGGACDHIHDWVLGTPEGKWVSMGVYPDGSYNVPAGLIYSFPVTCRNGEWTIVQGLPLDEFSRKKMDSTVEELMKQHSLMVASIERHSRRQCSA
GWHGDVFZ010520		Group Ⅲ	Syzygium samarangense	334	MAKNEAVRVLVTDAGGLVAFDLVQHIGSGMLGPDQPMIVHLLHRETDDVEALDDLKFIMTRYRLIKGIVATTDAEKACRNVEFAFLIGKVPSQTRTLRSRTYSFSDYKLQATALGNYAAANCKVLVIAYPADTIALTLKRCAPSIPPKNITCLTRLYHNCALGLISSTLDVPNRDVKNIIIWGNHSSPQHLDVNHATVKTSSGEYPVRELISNDAWLNGEFITEFQKWVDISNGTGTIINASPIAKAACDHFRDWVLGTPEGKWVSMGVFSDGSYNVPRDLIFSFPVTCRNGEWTIVQGLPLDEFSRKKIDSTVEELMKQHLLNVASVEGYLHG
LOC104450079	EgMDH1	Group Ⅱ	Eucalyptus grandis	346	MRASMLRLIRSRSSSAAPRPHLLRRAYGSESVPERKVAVLGAAGGIGQPLALLMKLNPLVSQLALYDIAGTPGVAADVGHINTRSEVAGYVGEEQLGQALEGSDVVIIPAGVPRKPGMTRDDLFNINAGIVKSLCTAIAKYCPNAVVNMISNPVNSTVPIAAEVFKKAGTYNEKKLFGVTTLDVVRAKTFYAGKAKVPVEEVNVPVVGGHAGITILPLFSQAVPKANLADEDIKALTKRTQDGGTEVVEAKAGKGSATLSMAYAGALFADACLKGLNGVPDVVECSFVQSSITELPFFASKVKLGKNGVEEVLELGPMSDFEKQGLESLIPELKASIEKGIKFANQ
LOC104421754	EgMDH2	Group Ⅲ	Eucalyptus grandis	438	MAVAELTAPTCAKQGLGSSQLSYLAARTSSFRRLSFRPPRRTHSSRISCSVNQTAQAPVAVETEVPKSNKPECFGVFCLTYDLKAEEETKSWKKLINVAVSGAAGMISNHLLFKLASGQVFGHDQPIALKLLGSERSFQALEGVAMELEDSLFPLLREVQIGIDPYEVFQDVEWALLIGAKPRGPGMERAGLLDINGQIFAEQGKALNAVASRNVKVIVVGNPCNTNALICLKNAPDIPAKNFHALTRLDENRAKCQLALKAGVFYDKVSNMTIWGNHSTTQVPDFLNARINGLPVKEVITDHEWLEEEFTEKVQKRGGVLIKKWGRSSAASTAVSIADAIKSLVTPTPEGDWFSSGVYTDGNPYGIAEGIVFSMPCRSKGDGDYELVKDVIFDDYLLK…
LOC104448518	EgMDH3	Group Ⅱ	Eucalyptus grandis	348	MRTAVLRSLRSAAARSAPSSSHLLRRGFSSESVPERKVVVLGAAGGIGQPLALLMKINPLVSKLSLYDIAGTPGVAADVGHINSRSEVAGYVGEDQLGQALEGADLVIIPAGVPRKPGMTRDDLFNINAGIVKSLCTAIAKYCPSAIVNMISNPVNSTVPIAAEVFKKAGTYDEKKLFGVTTLDVVRAKTFYAGKANLPVAGVDVPVVGGHAGITILPLFSQASPQANLPEDVIKALTKRTQDGGTEVVEAKAGKGSATLSMAYAGAVFADACLEGLNGVPDVVQCSFVQSSVTELPFFASKVVLGKNGVEKVLDLGPLSDYEKEGLEKLKPELKASIEKGIKFANDN
LOC104414491	EgMDH4	Group Ⅲ	Eucalyptus grandis	332	MAKQPVRVLVTGAAGQIGYALVPMIARGVMLGPDQPVILHMLDIPPAAEALNGVKMELIDAAFPLLKGVVATTDVVEACTGVGVAVMVGGFPRKEGMERKDVMTKMFQFTKSQASALEKHAAANCKVLVVANPANTNALILKEFAPSIPEKNISCLTRLDHNRALGQISERLKVQVCDVKNAIIWGNHSSSQYPDVNHATVNTPSGEKPVRELVKDDAWLNGEFISTVQQRGAAIIKARKLSSALSAASAACDHIRDWVLGTPEGTWVSMGVYSDGSYNVPAGLIYSFPVTCRNGEWTIVQGLPIDEFSRKKMDATAEELSEEKALAYSCLS
LOC104414059	EgMDH5	Group Ⅰ	Eucalyptus grandis	356	MQPASEANQRIARISAHLHPPNLQMEESAGLRRANCRAKGAAPGFKVAILGAAGGIGQPLALLMKINPLVSVLHLYDVVNTPGVTADISHMDTGAVVRGFLGQPQLEEALVGMDLVIIPAGVPRKPGMTRDDLFKINAGIVRTLCEGIAKSCPKAIVNLISNPVNSTVPIAAEVFKKAGTYDPKRLLGVTTLDVVRANTFVAEVLGLDPREVDVPVVGGHAGVTILPLLSQVKPPCSFTPPEIDYLTSRIQNGGTEVVEAKAGAGSATLSMAYASVKFADACLRGLRGDAGIVECAFVASQVTELPFFASKVRLGRTGAEEVLPLGPLNEYERAGLEKAKQELAESIQKGISFIKK
LOC104425977	EgMDH6	Group Ⅰ	Eucalyptus grandis	412	MAASSAASMSIGSTISFGSKTGPFPQSKPFGVKISSQNSFTSFSGLKAAKSVSCEADSSFLGKETTSALRQSFALKAQKQNQNFQYQLQPQASYKVTVLGAAGGIGQPLALLVKMSPLVSALHLYDIANVKGVAADLSHCNTPSQVLDFTGASELADSLKGANVVVIPAGVPRKPGMTRDDLFNINANIVKTLVEAVADNCPDAFIHIISNPVNSTVPIAAEVLKQKGVYNPKKLFGVTTLDVVRANTFVAQKKNVKLIDVDVPVVGGHAGITILPLLSKTKPSVSFTDEEVEQLTVRIQNAGTEVVEAKAGAGSATLSMAYAAARFVESSLRALDGDGDVYECAFVQSDLPDLPFFASRVKLGKQGVEALISSDLQGLTEYEQKALEALKPELKASIE…
LOC104414069	EgMDH7	Group Ⅰ	Eucalyptus grandis	356	MQPASKANQHITRISAHLHPPNFQMEESSGLRHANCQAKDVALRFRVAILGAAGGIGQPLVMLMNINLLVSVLRLYDVVNTPGVTADISHMDTGAVVRGYLGQQQLEEALVGMDLVIIPAGVPRKPGMRRDDLFNINTGIIRTLCEGIVKSCPKAIVNLISNPVNSTVPIAAEVFKRAGTYDPKRLLGVTMLDVVRANTFVAEVLGLDPREVDVPVVGGHAGVTILPLLSQVKPPCSFTPPEIDYLTSCIQNGGTEVVEAKAGAGSATLSMAYAAVKFADACLRGLRGDVGIVECAFVASQVTELPFFASKVRLSRTGAEEVLPLGPLNEYERAGLEKAKKELAESIQKGISFIKK
LOC104446356	EgMDH8	Group Ⅲ	Eucalyptus grandis	376	MDYIKLFEKAMVVSSSVALFWKIIKHMWSPINVEKEPVKVLVTGAAGQIGYALMPMIARGVMLGPDQPIIIHMLDTEKAAEALNGLKMELIDGAFPLLRGVVATTDVVEACRDVNIAVMLGGKPRQEGTERKDCISMNVSIYKAQASALEQHAAADCKVLVVANPANTNALILKESAPSIPEKNITCLMRLDHNRALGQIAEKLKVRVSDVKNIIIWGNHSSTQYPDVNHATVATSSGQRSVRDLIADNEWLNTEFITTVQQRGEAIMKARKRSSVLSAASAVCDHMHDWLLGTPKGTWVSMGVCSDGSYGIPPGLIYSFPVSCQNGEWSIVQGLKIDEFSRAKMDATANELIEEKSQAYLCLDRFCSLSSTSDEE
LOC104419791	EgMDH9	Group Ⅰ	Eucalyptus grandis	412	MASTSAATLLIGSTLSFGHKSGSLAQPKPFGVRLASRASLASFSGLKATTSVSCEAESSFLGKESGVALQQSVACKAQKQSQRLQYHLQPQASFKVAILGAAGGIGQPLSLLIKMSPLVSALHLYDIANVKGVAADLSHCNTPSQVLDFTGASELPNSLKGVNVVVIPAGVPRKPGMTRDDLFNINANIVKSLVEAVADNCPDAFIHIISNPVNSTVPIAAEILKQKGVYDPKKLFGVTTLDVVRANTFVAQKKNLKLIDVDVPVIGGHAGITILPLLSKTRPSVSFTDEEVEGLTVRIQNAGTEVVEAKAGAGSATLSMAYAAARFVESSLRALDGDGDVYECSFVQSDLTELPFFASRVKLGRKGIEALIPSDLQGLTEYEQKALDALKPELKASIE…
LOC104441897	EgMDH10	Group Ⅲ	Eucalyptus grandis	351	MHKTYSASSLGPDGLDLSQAFFRPIHNTAPPSQTNRHAKITVVGAGNVGMAIAQTVLTQDLVDEIALVDPMADKLRGEMLDLQHAAAFLPRTTILSSSSDYAVTSGSDLIVVTAGARQNPGESRLNLLQRNVALFRSIIPELAKHSPDAILMVVSNPVDILTYVAWKISGFPPNRVIGSGTNLDTSRFRFLLADHLEVNAQDVQAYVVGEHGDSSVALWSSISVGGVPILSFLERQQIPYEEEMLENIHKTVVEGAYEVINLKGYTSWAIGYSVASLARTLLRDQRRIHPVSVLARGFYGIEGGDVFLSLPAQLGRGGVVGVTNVHLTDEEMQKLRASAETLLELQSQLGI
LOC104443699	EgMDH11	Group Ⅲ	Eucalyptus grandis	352	MHKAPSSSSLGPGGLDLSRAFFTPIQETAPPSSTKRHTKIAVVGVGNVGMAIAQTILTQDVADELALIDAKPDKLRGEMLDLQHAAAFLPRTRISASVDYAVAAGSDLCIVTAGARQIPGESRLNLLQRNVALFRAIVPALARHAPESILLIVSNPVDVLTYVAWKLSGFPSNRVVGSGTNLDSSRFRFLIADHLDVNAQDVQAYIVGEHGDSSVALWSSISVGGVPVLSFLEKQQIPYEKETLEKIHKEVVDCAYEVISLKGYTSWAIGYSVANLARTLLRDQRRIHPVSVLARGFFGIEGGDVFLSLPAQLGRGGVLGVTNVHMTEEEAARLRKSARTILELLSQLDLGI
LOC108954540	EgMDH12	Group Ⅰ	Eucalyptus grandis	344	MQPASKANQHTTRISAHLHPPNFQMEESLGLMHANCQAKGTALGFKVAILGAAGGIGQPLAMLMKINLLISVLHLYDVVNTPGITADISHMDTGAVVRGFLGQQQLEEALVGMDLVIIPAGVPRKPGMTRDDLFNINAGIARTLCEGIVKSCLKAIVNLISNPVNSTVPIAAEVFKRAGTYDPKRLLGVTMLNVVRANTFVAEVLGLDPREVDVPVVGGHAGMMILPLLSQVKPLCSFTPPEIEYLTSRIQNGGTEVVEAHAAVKFANACLCMLRGDAGNFEYAFVASQVTELLFFASKVRLGHTGAEEVLLLGPLNEYEGAGLEKAKKELAESIRKGVSFIKK
LOC104414071	EgMDH13	Group Ⅰ	Eucalyptus grandis	378	MTPCLPDLSHLKRLQELQLDDFPELAEIPGLGELESLKFLHIIMCDVIKQLPNLSTLKNLSRLKLIHCVKLRAIEGLKELNFLEYAEIRHCMSLERLPDVPTSTKLETDQAPPEPAEHTMQPAKRLRLSVDYCALGGIGRPLAVLMKINPHVSVLHLYDVENTAGVTADISPTDTGAVVHGLLGQQQLEEGLVGMGLVIIPSGVPRKPRMTRDDPISNTFNSTVPIAAEDFKKAGTYDPKRPLGVTMLDVARANTFVAEVQGLDPREVDVPIVEGHAEVTILPLLSQFKPLTRQEIDYLTSRIQNGGQKLVEAEVGAGSATLSMMIELPFFAFKVRLSRTGAKEVLPLGLLNEYERSQVLLLSKFYFYFDYIKGKLLF
LOC104414066	EgMDH14	Group Ⅰ	Eucalyptus grandis	251	MQPASKANQRIARISAHLHPPNFQMEESSGLRHANCQAKGTAPGFKVAILGAAGGIGQPLAMLMKINLLVSVLHLYDVVNTPGVTADISHMDTVRGFREEALVVMDLVIIPAGVPRKPGMTRDDLFNINAGIVRTLCEGIVKSCPKAIVNLISNPVNSTVPIAAEVFKRAGTYDPKRMLGVTTLNVVRANTFVAEVLGLDPREVDVPVVGGHAGVTILLLLSQVKPPCSFTPQEIEYLISRIQNGGTEVVE
LOC_Os01g61380	OsMDH1	Group Ⅰ	Oryza sativa	396	MASTVAINLIGAQAGIISKLRNCDITSYSGLKARSSISFESRSSFLGQNASLRSSISPRIVPKANSGSHISPEASYKVAVLGAAGGIGQPLGLLIKMSPLVSALHLYDIANVKGVAADLSHCNTPSQVLDFTGPSELANCLKGVDVVVIPAGVPRKPGMTRDDLFNINASIVKTLVEAVADNCPEAFIHIISNPVNSTVPIAAEVLKQKGVYNPKKLFGVTTLDVVRANTFIAQKKNLKLIDVDVPVVGGHAGITILPLLSKTRPSVTFTNEETEELTRRIQNAGTEVVEAKAGAGSATLSMAYAAARFVESSLRALAGDPDVYECTFVQSELTELLFFASRVKLGKNGVESIISSDLEGVTEYEAKALESLKPELKASIEKGIEFVHKQQAAATS
LOC_Os01g46070	OsMDH1.2	Group Ⅱ	Oryza sativa	340	MRPSLMRSASQVLRRRRGYSSASGQPERKVAILGAAGGIGQPLSLLMKLNPLVSSLSLYDIAGTPGVAADVSHINAPAQVKGFMGDDQLGEALEGSDIVIIPAGVPRKPGMTRDDLFNINAGIVKNLCTAIAKYCPNALVNMISNPVNSTVPIAAEVFKKAGTYDEKKLFGVTTLDVVRAKTFYAGKANVPVTDVNVPVVGGHAGITILPLFSQATPATNALSDEDIKALTKRTQDGGTEVVEAKAGKGSATLSMAYAGAVFANACLKGLNGVPDVVECSFVQSTVTELPFFASKVKLGKNGVEEVLGLGQLSDFEKEGLENLKGELKASIEKGIKFANA
LOC_Os02g01510	OsMDH3.1	Group Ⅰ	Oryza sativa	392	MSHKTTIDHFHFHFQERSTSPLAFHPVSEGGRSRSRSRDMKKASSLSELGFDAEGASSGFFRPVADGGSTPTSHRRRLTKISVIGAGNVGMAIAQTILTRDMADEIALVDAVPDKLRGEMLDLQHAAAFLPRVRLVSDTDLAVTRGSDLAIVTAGARQIPGESRLNLLQRNVALFRKIVPALAEHSPEALLLIVSNPVDVLTYVAWKLSGFPASRVIGSGTNLDSSRFRFLLAEHLQVNAQDVQAYMVGEHGDSSVAIWSSMSVAGMPVLKSLRESHQSFDEEALEGIRRAVVDSAYEVISLKGYTSWAIGYSVASLAASLLRDQHRIHPVSVLASGFHGIPQDHEVFLSLPARLGRAGVLGVAEMELTEEEARRLRRSAKTLWENCQLLDL
LOC_Os03g56280	OsMDH2.1	Group Ⅲ	Oryza sativa	354	MQPDSASHRIARVAAHLSPSPRPQMEEGVRPAPCRAKGGAPGFKVAVLGAAGGIGQPLSLLMKLNPLVSVLHLYDVVNTPGVTADVSHMDTTAVVRGFLGPNQLEAALTGMDLVIIPAGLPRKPGMTRDDLFNKNAGIVRSLCEGVAKCCPNAIVNLISNPVNSTVPIAAEVFKKAGTYDPKRLLGVTTLDVARANTFVAEVLGIDPKDVNVPVVGGHAGVTILPLLSQVHPPCSFTPDEISYLTKRIQNGGTEVVEAKAGAGSATLSMAFAAAKFGDACLRAMRGDAGVVECSYVASAVTELPFFATKVRLGRAGAEEVLPLGPLNDFERAGLEMAKKELMESIQKGIDFMNK
LOC_Os04g46560	OsMDH4.1	Group Ⅲ	Oryza sativa	352	MMSSNSLFQRLAKWCPWLLRDEPKKPVKVLVTGAAGQIGYAIVAMIARGLMLGADQPVVLHLLDLPVAANALNGVRMELIDAALPLLRGVVATSDEAEAFKGVNVAIVIGGWPRRDGMERKDLISKNVTIYKSQASALHQHAAPNCKVLVVANPANTNALVLKEFAPAIPAKNITCLTRLDHNRALGQVAEKLNVHVGDVKNAIIWGNHSSTQFPDASHATVSTDRGERPVRELIADEIWLREEFVTDVQQRGAAVIKARKQSSSLSAASAACDHMRDWILGTPKGTWVSMGVYSDGSYGVPEGVFFSFPVTCEKGEWSVVQGLEIDDFARSKMETSATELKEEKSIAYEFL
LOC_Os05g49880	OsMDH5.1	Group Ⅱ	Oryza sativa	340	MRPSLLRYAAQALRRRDYSSAAAAAERKVAILGAAGGIGQPLALLMKLNPLVSSLSLYDIAGTPGVAADVSHINSPALVKGFVGEEQLGEALEGSDVVIIPAGVPRKPGMTRDDLFNINAGIVKGLCTAISKYCPNALVNMISNPVNSTVPIAAEVFKKAGTYDEKKLFGVTTLDVVRAKTFYAGKANVPVTEVNVPVVGGHAGITILPLFSQATPASNALSHEDIKALTKRTQDGGTEVVEAKAGKGSATLSMAYAGAVFADACLKGLNGVPDVVECSFVQSTVTELPFFASKVRLGKNGVEEVLGLGQLSEFEKEGLENLKGELKSSIEKGIKFAHAN
LOC_Os06g01590	OsMDH6.1	Group Ⅲ	Oryza sativa	360	MKKASSLSELGFDADGPSFFRHLTLTDGDDGTLPRRRLIKISVIGAGNVGMAIAQTILTQDLADEIVLIDAVADKVRGEMLDLQHAAAFLPRVNIVSGTEVSLTRSSDLVIVTAGARQIPGETRLNLLQRNVSLFRKIVPAAAEASPESVLVIVSNPVDVLTYVAWKLSGFPASRVIGSGTNLDSSRFRFLLAEHLEVSAQDVQAYMVGEHGDSSVALWSSISVGGMPVLAHLQKNHRSAATAKKFDEAALEGIRRAVVGSAYEVIKLKGYTSWAIGYSVASIAWSLLRDQRRIHPVSVLAKGLVRGVPADRELFLSLPARLGRAGVLGVAAELVLTDEEERRLRISAETLWGYCHALGL
LOC_Os07g43700	OsMDH7.1	Group Ⅰ	Oryza sativa	404	MASAAMSTLNLSSSPLTKQQLRFGASTLSAEHVSGFSSARPAPSLCCSSSHWRAVKLRPRRRPWRRAGNRVVAQAGGYKVAILGAAGGIGQPLSLLVKMSPLVSALHLYDIANVDGVTADLGHCNTPAKVAGFTGKEELAGCLAGVDVVVIPAGVPRKPGMTRDDLFGINAGIVRELVEAVADHAPAALVHVISNPVNSTVPIAAEVLKRKGVYDPRKLFGVTTLDVVRANTFVAEMKGLPLADVDVPVVGGHAAATILPLLSKARPKTAFTDEEVEALTRRIQNAGTEVVEAKAKAGGGSATLSMAYAAARFLEASLRGLDGDADVYECSYVQCQAVPELPFFACRVKLGRDGVEEVAAAGAELRGLTEFEARALEALKPQLKKSIDKGVAYAQQQPA…
LOC_Os08g33720	OsMDH8.1	Group Ⅰ	Oryza sativa	397	MASAVTISSVGAQAGMISKPRNHGFTSYSGLKAASSVSFESGSSFLGRNASLRASVAPRIVPKAKSGSQISPEASYKVAVLGAAGGIGQPLGLLIKMSPLVSELHLYDIANVKGVAADLSHCNTPSQVLDFTGPSELANCLKGVDVVVIPAGVPRKPGMTRDDLFNINASIVKSLVEAVADNCPEAFIHIISNPVNSTVPIAAEVLKQKGVYNPKKLFGVTTLDVVRANTFVAQKKNLKLIDVDVPVVGGHAGITILPLLSKTMPSVTFTDEETEQLTKRIQNAGTEVVEAKAGAGSATLSMAYAAARFVESSLRALAGDPDVYECTFVQSELTELPFFASRVKLGKNGVESIISADLEGVTEYEAKALEALKSELKASIEKGIEFVHKQQTAAASV
LOC_Os08g44810	OsMDH8.2	Group Ⅲ	Oryza sativa	433	MAAIDLSSPARSSPAPLSPRRGSLHLLLRRPRRPTLRCSLDAAPKQAQAQGPPAAVAAEEAPTARKECYGVFCTTYDLRADEKTKSWKSLVNVAVSGAAGMISNHLLFKLASGEVFGPDQPIALKLLGSERSIQALEGVAMELEDSLYPLLREVSIGIDPYVVFEDAEWALLIGAKPRGPGMERSALLDINGQIFAEQGKALNSVASRNVKVIVVGNPCNTNALICLKNAPNIPAKNFHALTRLDENRAKCQLALKAGVFYDKVSNMTIWGNHSTTQVPDFLNAKINGRPVKEVIKDTKWLEDEFTKTVQKRGGVLIQKWGRSSAASTAVSIVDAIRSLVNPTPEGDWFSTGVYTTGNPYGIAEDIVFSMPCRSKGDGDYELVKDVAMDDFLWERIKKS…
LOC_Os10g33800	OsMDH10.1	Group Ⅲ	Oryza sativa	332	MAKEPMRVLVTGAAGQIGYALVPMIARGVMLGADQPVILHMLDIPPATESLNGLKMELVDAAFPLLKGIVATTDVVEACTGVNVAVMVGGFPRKEGMERKDVMSKNVSIYKSQASALEAHAAPNCKVLVVANPANTNALILKEFAPSIPEKNITCLTRLDHNRALGQISEKLNVQVTDVKNAIIWGNHSSTQYPDVNHATVKTPSGEKPVRELVADDEWLNTEFISTVQQRGAAIIKARKQSSALSAASSACDHIRDWVLGTPEGTFVSMGVYSDGSYGVPAGLIYSFPVTCSGGEWTIVQGLPIDEFSRKKMDATAQELSEEKTLAYSCLN
LOC_Os12g43630	OsMDH12.1	Group Ⅰ	Oryza sativa	356	MEDAAAAARRMERLASHLRPPASQMEESPLLRGSNCRAKGAAPGFKVAILGASGGIGQPLALLMKMNPLVSVLHLYDVVNTPGVTADISHMNTGAVVRGFLGQPQLENALTGMDLVIIPAGVPRKPGMTRDDLFNINAGIVRTLCEGIAKCCPNAIVNVISNPVNSTVPIAAEVFKKAGTYDPKRLLGVTTLDVVRANTFVAEVLGLDPRDVNVPVIGGHAGVTILPLLSQVNPPCSFTSEEISYLTTRIQNGGTEVVEAKAGAGSATLSMAYAASKFADACLRGLRGDAGIVECSFVASQVTELPFFASKVRLGRCGIEEILSLGPLNEFERAGLEKAKKELAESIQKGVAFINK
AT1G04410.1		Group Ⅲ	Arabidopsis thaliana	272	AAFPLLKGVVATTDAVEGCTGVNVAVMVGGFPRKEGMERKDVMSKNVSIYKSQAAALEKHAAPNCKVLVVANPANTNALILKEFAPSIPEKNISCLTRLDHNRALGQISERLSVPVSDVKNVIIWGNHSSSQYPDVNHAKVQTSSGEKPVRELVKDDAWLDGEFISTVQQRGAAIIKARKLSSALSAASSACDHIRDWVLGTPEGTFVSMGVYSDGSYSVPSGLIYSFPVTCRNGDWSIVQGLPIDEVSRKKMDLTAEELKEEKDLAYSCLS
AT1G28320.1		Group Ⅲ	Arabidopsis thaliana	647	AKVLFEAGQDMALVLTVASVVEPFLTLGHRTSSSISQDPVKLIPGAMIEIMVEGQLKSEKEAPFWVPAQLLSLVDVPVSSAALQSLIEASSGSKDSGWDIGWSLVSAANGSQPSINIEHYSKPLMQLDEPHNANFMAKSATRMAILGVPLSLLGQPSMNFASSSSKGDTLVALGSPFGILSPVNFFNSVSTGSIANSYPSGSLKKSLMIADVRCLPGMEGAPVFAKNGHLIGILIRPLRQKNSGVEIQLVVPWGAITTACSHLLLEEPSVEGKASQWGSEVLSVKSDASIPAQVAIEKAMESVCLITVNDGVWASGIILNEHGLILTNAHLLEPWRYGKGGVYGEGFKPYVLGAEEFSSTGSKFWEQKSQTLPRKAPRNHYSSVGENIREYKHNFLQTG…
AT1G31180.2		Group Ⅲ	Arabidopsis thaliana	353	DGIGPEVISVAKNVLQKAGFLQGLEFDFQEMPFGGAALDLVGVPLPEETSTAAKQSDAILLGAIGGYKWDKNEKHLRPEMGLLNIRRDLNVFANLRPATVLPQLVDASTLKKEVAQGVDMMIVRELTGGIYFGEPRGITINENGEEVGFNTEIYAAHEIDRIARVAFETARKRRGKLCSVDKANVLDASILWRKRVTALASEYPDVELSHMYVDNAAMQLVRDPKQFDTIVTNNIFGDILSDEASMITGSIGMLPSASLGESGPGLFEPIHGSAPDIAGQDKANPLATILSAAMLLKYGLGEEKAAKMIEDAVVDALNKGFRTGDIYSPGNKLVGCKEMGEEVLKSVDSKVPV
AT1G53240.1		Group Ⅱ	Arabidopsis thaliana	274	GVAADVGHINTRSEVVGYMGDDNLAKALEGADLVIIPAGVPRKPGMTRDDLFNINAGIVKNLCTAIAKYCPHALINMISNPVNSTVPIAAEIFKKAGMYDEKKLFGVTTLDVVRARTFYAGKANVPVAEVNVPVIGGHAGVTILPLFSQATPQANLSSDILTALTKRTQDGGTEVVEAKAGKGSATLSMAYAGALFADACLKGLNGVPDVIECSYVQSTITELPFFASKVRLGKNGVEEVLDLGPLSDFEKEGLEALKPELKSSIEKGVKFANQ
AT2G22780.1		Group Ⅰ	Arabidopsis thaliana	292	KMNPLVSVLHLYDVANAPGVTADISHMDTSAVVRGFLGQPQLEEALTGMDLVIIPAGVPRKPGMTRDDLFNINAGIVRTLSEAIAKCCPKAIVNIISNPVNSTVPIAAEVFKKAGTFDPKKLMGVTMLDVVRANTFVAEVMSLDPREVEVPVVGGHAGVTILPLLSQVKPPCSFTQKEIEYLTDRIQNGGTEVVEAKAGAGSATLSMAYAAVEFADACLRGLRGDANIVECAYVASHVTELPFFASKVRLGRCGIDEVYGLGPLNEYERMGLEKAKKELSVSIHKGVTFAKK
AT3G15020.1		Group Ⅱ	Arabidopsis thaliana	274	GVAADVGHINTRSQVSGYMGDDDLGKALEGADLVIIPAGVPRKPGMTRDDLFNINAGIVKNLSIAIAKYCPQALVNMISNPVNSTVPIAAEIFKKAGTYDEKKLFGVTTLDVVRARTFYAGKSDVNVAEVNVPVVGGHAGITILPLFSQASPQANLSDDLIRALTKRTQDGGTEVVEAKAGKGSATLSMAYAGALFADACLKGLNGVPNVVECSFVQSTITELPFFASKVRLGKNGVEEVLDLGPLSDFEKEGLEALKAELKSSIEKGIKFANQ
AT3G47520.1		Group Ⅰ	Arabidopsis thaliana	333	DKKPYGFKINASYKVAVLGAAGGIGQPLSLLIKMSPLVSTLHLYDIANVKGVAADLSHCNTPSQVRDFTGPSELADCLKDVNVVVIPAGVPRKPGMTRDDLFNINANIVKTLVEAVAENCPNAFIHIISNPVNSTVPIAAEVLKKKGVYDPKKLFGVTTLDVVRANTFVSQKKNLKLIDVDVPVIGGHAGITILPLLSKTKPSVNFTDEEIQELTVRIQNAGTEVVDAKAGAGSATLSMAYAAARFVESSLRALDGDGDVYECSFVESTLTDLPFFASRVKIGKNGLEAVIESDLQGLTEYEQKALEALKVELKASIDKGVAFANKPAAAAAN
AT5G09660.4		Group Ⅰ	Arabidopsis thaliana	300	MNPLVSLLHLYDVVNAPGVTADVSHMDTGAVVRGFLGAKQLEDALTGMDLVIIPAGIPRKPGMTRDDLFKINAGIVKTLCEGVAKCCPNAIVNLISNPVNSTVPIAAEVFKKAGTYDPKKLLGVTTLDVARANTFVAEVLGLDPREVDVPVVGGHAGVTILPLLSQVKPPSSFTPQEIEYLTNRIQNGGTEVVEAKAGAGSATLSMAYAAAKFADACLRGLRGDANVVECSFVASQVNLENSFTLFHCFNGFNLKWQLTTGDRISFLCNKSAPWPYRSRGSVSAWTLKRIRKDWSGESKR
AT5G43330.1		Group Ⅲ	Arabidopsis thaliana	266	KGVVATTDAVEACTGVNVAVMVGGFPRKEGMERKDVMSKNVSIYKSQASALEKHAAPNCKVLVVANPANTNALILKEFAPSIPEKNITCLTRLDHNRALGQVSERLSVPVSDVKNVIIWGNHSSTQYPDVNHATVKTSVGEKPVRELVKNDEWLNGEFISTVQQRGAAIIKARKLSSALSAASSACDHIRDWVVGTPEGTFVSMGVYSDGSYNVPAGLIYSFPVTCRNGEWTIVQGLPIDDASRKKMDLTAEELKEEKDLAYSCLS
AT5G56720.1		Group Ⅲ	Arabidopsis thaliana	305	IMLGPDQPMILHLLDIEPASSSLEAVKMELQDSAFPLLKGVIATTNVVEACKDVNIVIMIGGFPRIAGMERKDVMSKNVVIYKAQASALERYASDDCKVLVVANPANTNALILKEFAPSIPEENITCLTRLDHNRALAQLADKLSVPVSSVKNVIVWGNHSSTQYPDTNHATVSTKTGDRPLKELVTDHNWLKNEFIVEVQQRGAAVLRARKQSSAFSAAGAACDHIRDWFLGTPKGTWVSMGVCSDGSYGIPPGLVYSFPVICEKGSWKIVQGLSIDEFSREKMDDSARELAEEKDLAYSCLNV
AT5G58330.1		Group Ⅲ	Arabidopsis thaliana	371	TKKECYGVFCLTYDLKAEEETRSWKKLINIAVSGAAGMISNHLLFKLASGEVFGPDQPIALKLLGSERSIQALEGVAMELEDSLFPLLREVDIGTDPNEVFQDVEWAILIGAKPRGPGMERADLLDINGQIFAEQGKALNKAASPNVKVLVVGNPCNTNALICLKNAPNIPAKNFHALTRLDENRAKCQLALKAGVFYDKVSNMTIWGNHSTTQVPDFLNARINGLPVKEVITDHKWLEEGFTESVQKRGGLLIQKWGRSSAASTAVSIVDAIKSLVTPTPEGDWFSTGVYTDGNPYGIEEGLVFSMPCRSKGDGDYELVKDVEIDDYLRQRIAKSEAELLAEKRCVAHLTGEGIAYCDLGPVDTMLPGEV

## Sheet: Table S2
Table S2. Systematic identification of MDHs across 29 plant species
Lineage	Organism	Number of MDH proteins				Version of database	Sources of data
		Group Ⅰ	Group Ⅱ	Group Ⅲ	Total
Algaes
	Porphyra umbilicalis	0	0	6	6	v1.5	https://phytozome-next.jgi.doe.gov/
	Chlamydomonas reinhardtii	2	1	2	5	v5.6	https://phytozome-next.jgi.doe.gov/
	Dunaliella salina	2	1	2	5
	Micromonas pusilla CCMP1545	2	1	2	5	v3.0	https://phytozome-next.jgi.doe.gov/
	Volvox carteri	3	1	2	6	v2.1	https://phytozome-next.jgi.doe.gov/
Mosses
	Marchantia polymorpha	4	1	2	7	v3.1	https://phytozome-next.jgi.doe.gov/
	Physcomitrium patens	10	7	14	31	v3.3	https://phytozome-next.jgi.doe.gov/
	Sphagnum fallax	4	3	9	16	v1.1	https://phytozome-next.jgi.doe.gov/
Ferns
	Ceratopteris richardii	10	2	18	30		https://phytozome-next.jgi.doe.gov/
	Selaginella moellendorffii	2	2	7	11	v1.0	https://phytozome-next.jgi.doe.gov/
Gymnosperms
	Cunninghamia lanceolata	3	2	7	12
	Thuja plicata	11	1	9	21	v3.1	https://phytozome-next.jgi.doe.gov/
	Abies alba	19	4	4	27	v1.1	https://treegenesdb.org/FTP/Genomes/Abies_alba/v1.1/annotation/
	Ginkgo biloba	4	2	4	10	v1.0	https://treegenesdb.org/FTP/Genomes/Gibi/v1.0/annotation/
	Gnetum montanum	3	1	2	6	v1.0	https://treegenesdb.org/FTP/Genomes/Gnmo/v1.0/annotation/
	Picea abies	3	2	5	10	v1.0b	https://ngdc.cncb.ac.cn/ppgr/download
Angiosperms
	Amborella trichopoda	3	1	3	7		https://planttfdb.gao-lab.org/download.php
	Magnolia biondii	7	1	4	12		https://doi.org/10.5061/dryad.s4mw6m947
	Camphora officinarum	5	2	6	13	v1.1	https://treegenesdb.org/FTP/Genomes/Camo/v1.1/annotation/
	Arabidopsis thaliana	3	2	6	11
	Camellia sinensis	8	4	8	20		https://ngdc.cncb.ac.cn/ppgr/download
	Malus domestica	5	2	7	14		https://ngdc.cncb.ac.cn/ppgr/download
	Populus trichocarpav	6	5	5	16
	Vitis vinifera	5	3	10	18		https://planttfdb.gao-lab.org/download.php
	Phyllostachys edulis	7	4	11	22	v1.1	https://ngdc.cncb.ac.cn/ppgr/download
	Oryza sativa	5	2	5	12
	Eucalyptus grandis	7	2	5	14	v2.0	https://planttfdb.gao-lab.org/download.php
	Psidium guajava	3	2	3	9		https://ngdc.cncb.ac.cn/gwh/ncbi_assembly/57015/show
	Syzygium samarangense	6	5	14	25	v1.0	https://ngdc.cncb.ac.cn/gwh/Assembly/68154/show

## Sheet: Table S3
Table S3. Phylogenetic tree construction details of MDHs from 4 plant species
Organism	Gene ID	Gene name	Group	Protein length	Protein Sequences
Eucalyptus grandis	LOC104450079	EgMDH1	Group Ⅱ	346	MRASMLRLIRSRSSSAAPRPHLLRRAYGSESVPERKVAVLGAAGGIGQPLALLMKLNPLVSQLALYDIAGTPGVAADVGHINTRSEVAGYVGEEQLGQALEGSDVVIIPAGVPRKPGMTRDDLFNINAGIVKSLCTAIAKYCPNAVVNMISNPVNSTVPIAAEVFKKAGTYNEKKLFGVTTLDVVRAKTFYAGKAKVPVEEVNVPVVGGHAGITILPLFSQAVPKANLADEDIKALTKRTQDGGTEVVEAKAGKGSATLSMAYAGALFADACLKGLNGVPDVVECSFVQSSITELPFFASKVKLGKNGVEEVLELGPMSDFEKQGLESLIPELKASIEKGIKFANQ
	LOC104421754	EgMDH2	Group Ⅰ	438	MAVAELTAPTCAKQGLGSSQLSYLAARTSSFRRLSFRPPRRTHSSRISCSVNQTAQAPVAVETEVPKSNKPECFGVFCLTYDLKAEEETKSWKKLINVAVSGAAGMISNHLLFKLASGQVFGHDQPIALKLLGSERSFQALEGVAMELEDSLFPLLREVQIGIDPYEVFQDVEWALLIGAKPRGPGMERAGLLDINGQIFAEQGKALNAVASRNVKVIVVGNPCNTNALICLKNAPDIPAKNFHALTRLDENRAKCQLALKAGVFYDKVSNMTIWGNHSTTQVPDFLNARINGLPVKEVITDHEWLEEEFTEKVQKRGGVLIKKWGRSSAASTAVSIADAIKSLVTPTPEGDWFSSGVYTDGNPYGIAEGIVFSMPCRSKGDGDYELVKDVIFDDYLLK…
	LOC104448518	EgMDH3	Group Ⅱ	348	MRTAVLRSLRSAAARSAPSSSHLLRRGFSSESVPERKVVVLGAAGGIGQPLALLMKINPLVSKLSLYDIAGTPGVAADVGHINSRSEVAGYVGEDQLGQALEGADLVIIPAGVPRKPGMTRDDLFNINAGIVKSLCTAIAKYCPSAIVNMISNPVNSTVPIAAEVFKKAGTYDEKKLFGVTTLDVVRAKTFYAGKANLPVAGVDVPVVGGHAGITILPLFSQASPQANLPEDVIKALTKRTQDGGTEVVEAKAGKGSATLSMAYAGAVFADACLEGLNGVPDVVQCSFVQSSVTELPFFASKVVLGKNGVEKVLDLGPLSDYEKEGLEKLKPELKASIEKGIKFANDN
	LOC104414491	EgMDH4	Group Ⅰ	332	MAKQPVRVLVTGAAGQIGYALVPMIARGVMLGPDQPVILHMLDIPPAAEALNGVKMELIDAAFPLLKGVVATTDVVEACTGVGVAVMVGGFPRKEGMERKDVMTKMFQFTKSQASALEKHAAANCKVLVVANPANTNALILKEFAPSIPEKNISCLTRLDHNRALGQISERLKVQVCDVKNAIIWGNHSSSQYPDVNHATVNTPSGEKPVRELVKDDAWLNGEFISTVQQRGAAIIKARKLSSALSAASAACDHIRDWVLGTPEGTWVSMGVYSDGSYNVPAGLIYSFPVTCRNGEWTIVQGLPIDEFSRKKMDATAEELSEEKALAYSCLS
	LOC104414059	EgMDH5	Group Ⅰ	356	MQPASEANQRIARISAHLHPPNLQMEESAGLRRANCRAKGAAPGFKVAILGAAGGIGQPLALLMKINPLVSVLHLYDVVNTPGVTADISHMDTGAVVRGFLGQPQLEEALVGMDLVIIPAGVPRKPGMTRDDLFKINAGIVRTLCEGIAKSCPKAIVNLISNPVNSTVPIAAEVFKKAGTYDPKRLLGVTTLDVVRANTFVAEVLGLDPREVDVPVVGGHAGVTILPLLSQVKPPCSFTPPEIDYLTSRIQNGGTEVVEAKAGAGSATLSMAYASVKFADACLRGLRGDAGIVECAFVASQVTELPFFASKVRLGRTGAEEVLPLGPLNEYERAGLEKAKQELAESIQKGISFIKK
	LOC104425977	EgMDH6	Group Ⅰ	412	MAASSAASMSIGSTISFGSKTGPFPQSKPFGVKISSQNSFTSFSGLKAAKSVSCEADSSFLGKETTSALRQSFALKAQKQNQNFQYQLQPQASYKVTVLGAAGGIGQPLALLVKMSPLVSALHLYDIANVKGVAADLSHCNTPSQVLDFTGASELADSLKGANVVVIPAGVPRKPGMTRDDLFNINANIVKTLVEAVADNCPDAFIHIISNPVNSTVPIAAEVLKQKGVYNPKKLFGVTTLDVVRANTFVAQKKNVKLIDVDVPVVGGHAGITILPLLSKTKPSVSFTDEEVEQLTVRIQNAGTEVVEAKAGAGSATLSMAYAAARFVESSLRALDGDGDVYECAFVQSDLPDLPFFASRVKLGKQGVEALISSDLQGLTEYEQKALEALKPELKASIE…
	LOC104414069	EgMDH7	Group Ⅰ	356	MQPASKANQHITRISAHLHPPNFQMEESSGLRHANCQAKDVALRFRVAILGAAGGIGQPLVMLMNINLLVSVLRLYDVVNTPGVTADISHMDTGAVVRGYLGQQQLEEALVGMDLVIIPAGVPRKPGMRRDDLFNINTGIIRTLCEGIVKSCPKAIVNLISNPVNSTVPIAAEVFKRAGTYDPKRLLGVTMLDVVRANTFVAEVLGLDPREVDVPVVGGHAGVTILPLLSQVKPPCSFTPPEIDYLTSCIQNGGTEVVEAKAGAGSATLSMAYAAVKFADACLRGLRGDVGIVECAFVASQVTELPFFASKVRLSRTGAEEVLPLGPLNEYERAGLEKAKKELAESIQKGISFIKK
	LOC104446356	EgMDH8	Group Ⅰ	376	MDYIKLFEKAMVVSSSVALFWKIIKHMWSPINVEKEPVKVLVTGAAGQIGYALMPMIARGVMLGPDQPIIIHMLDTEKAAEALNGLKMELIDGAFPLLRGVVATTDVVEACRDVNIAVMLGGKPRQEGTERKDCISMNVSIYKAQASALEQHAAADCKVLVVANPANTNALILKESAPSIPEKNITCLMRLDHNRALGQIAEKLKVRVSDVKNIIIWGNHSSTQYPDVNHATVATSSGQRSVRDLIADNEWLNTEFITTVQQRGEAIMKARKRSSVLSAASAVCDHMHDWLLGTPKGTWVSMGVCSDGSYGIPPGLIYSFPVSCQNGEWSIVQGLKIDEFSRAKMDATANELIEEKSQAYLCLDRFCSLSSTSDEE
	LOC104419791	EgMDH9	Group Ⅰ	412	MASTSAATLLIGSTLSFGHKSGSLAQPKPFGVRLASRASLASFSGLKATTSVSCEAESSFLGKESGVALQQSVACKAQKQSQRLQYHLQPQASFKVAILGAAGGIGQPLSLLIKMSPLVSALHLYDIANVKGVAADLSHCNTPSQVLDFTGASELPNSLKGVNVVVIPAGVPRKPGMTRDDLFNINANIVKSLVEAVADNCPDAFIHIISNPVNSTVPIAAEILKQKGVYDPKKLFGVTTLDVVRANTFVAQKKNLKLIDVDVPVIGGHAGITILPLLSKTRPSVSFTDEEVEGLTVRIQNAGTEVVEAKAGAGSATLSMAYAAARFVESSLRALDGDGDVYECSFVQSDLTELPFFASRVKLGRKGIEALIPSDLQGLTEYEQKALDALKPELKASIE…
	LOC104441897	EgMDH10	Group Ⅰ	351	MHKTYSASSLGPDGLDLSQAFFRPIHNTAPPSQTNRHAKITVVGAGNVGMAIAQTVLTQDLVDEIALVDPMADKLRGEMLDLQHAAAFLPRTTILSSSSDYAVTSGSDLIVVTAGARQNPGESRLNLLQRNVALFRSIIPELAKHSPDAILMVVSNPVDILTYVAWKISGFPPNRVIGSGTNLDTSRFRFLLADHLEVNAQDVQAYVVGEHGDSSVALWSSISVGGVPILSFLERQQIPYEEEMLENIHKTVVEGAYEVINLKGYTSWAIGYSVASLARTLLRDQRRIHPVSVLARGFYGIEGGDVFLSLPAQLGRGGVVGVTNVHLTDEEMQKLRASAETLLELQSQLGI
	LOC104443699	EgMDH11	Group Ⅰ	352	MHKAPSSSSLGPGGLDLSRAFFTPIQETAPPSSTKRHTKIAVVGVGNVGMAIAQTILTQDVADELALIDAKPDKLRGEMLDLQHAAAFLPRTRISASVDYAVAAGSDLCIVTAGARQIPGESRLNLLQRNVALFRAIVPALARHAPESILLIVSNPVDVLTYVAWKLSGFPSNRVVGSGTNLDSSRFRFLIADHLDVNAQDVQAYIVGEHGDSSVALWSSISVGGVPVLSFLEKQQIPYEKETLEKIHKEVVDCAYEVISLKGYTSWAIGYSVANLARTLLRDQRRIHPVSVLARGFFGIEGGDVFLSLPAQLGRGGVLGVTNVHMTEEEAARLRKSARTILELLSQLDLGI
	LOC108954540	EgMDH12	Group Ⅰ	344	MQPASKANQHTTRISAHLHPPNFQMEESLGLMHANCQAKGTALGFKVAILGAAGGIGQPLAMLMKINLLISVLHLYDVVNTPGITADISHMDTGAVVRGFLGQQQLEEALVGMDLVIIPAGVPRKPGMTRDDLFNINAGIARTLCEGIVKSCLKAIVNLISNPVNSTVPIAAEVFKRAGTYDPKRLLGVTMLNVVRANTFVAEVLGLDPREVDVPVVGGHAGMMILPLLSQVKPLCSFTPPEIEYLTSRIQNGGTEVVEAHAAVKFANACLCMLRGDAGNFEYAFVASQVTELLFFASKVRLGHTGAEEVLLLGPLNEYEGAGLEKAKKELAESIRKGVSFIKK
	LOC104414071	EgMDH13	Group Ⅰ	378	MTPCLPDLSHLKRLQELQLDDFPELAEIPGLGELESLKFLHIIMCDVIKQLPNLSTLKNLSRLKLIHCVKLRAIEGLKELNFLEYAEIRHCMSLERLPDVPTSTKLETDQAPPEPAEHTMQPAKRLRLSVDYCALGGIGRPLAVLMKINPHVSVLHLYDVENTAGVTADISPTDTGAVVHGLLGQQQLEEGLVGMGLVIIPSGVPRKPRMTRDDPISNTFNSTVPIAAEDFKKAGTYDPKRPLGVTMLDVARANTFVAEVQGLDPREVDVPIVEGHAEVTILPLLSQFKPLTRQEIDYLTSRIQNGGQKLVEAEVGAGSATLSMMIELPFFAFKVRLSRTGAKEVLPLGLLNEYERSQVLLLSKFYFYFDYIKGKLLF
	LOC104414066	EgMDH14	Group Ⅰ	251	MQPASKANQRIARISAHLHPPNFQMEESSGLRHANCQAKGTAPGFKVAILGAAGGIGQPLAMLMKINLLVSVLHLYDVVNTPGVTADISHMDTVRGFREEALVVMDLVIIPAGVPRKPGMTRDDLFNINAGIVRTLCEGIVKSCPKAIVNLISNPVNSTVPIAAEVFKRAGTYDPKRMLGVTTLNVVRANTFVAEVLGLDPREVDVPVVGGHAGVTILLLLSQVKPPCSFTPQEIEYLISRIQNGGTEVVE
Arabidop sisthaliana	AT1G04410.1		Group Ⅰ	272	AAFPLLKGVVATTDAVEGCTGVNVAVMVGGFPRKEGMERKDVMSKNVSIYKSQAAALEKHAAPNCKVLVVANPANTNALILKEFAPSIPEKNISCLTRLDHNRALGQISERLSVPVSDVKNVIIWGNHSSSQYPDVNHAKVQTSSGEKPVRELVKDDAWLDGEFISTVQQRGAAIIKARKLSSALSAASSACDHIRDWVLGTPEGTFVSMGVYSDGSYSVPSGLIYSFPVTCRNGDWSIVQGLPIDEVSRKKMDLTAEELKEEKDLAYSCLS
	AT1G28320.1		Group Ⅰ	647	AKVLFEAGQDMALVLTVASVVEPFLTLGHRTSSSISQDPVKLIPGAMIEIMVEGQLKSEKEAPFWVPAQLLSLVDVPVSSAALQSLIEASSGSKDSGWDIGWSLVSAANGSQPSINIEHYSKPLMQLDEPHNANFMAKSATRMAILGVPLSLLGQPSMNFASSSSKGDTLVALGSPFGILSPVNFFNSVSTGSIANSYPSGSLKKSLMIADVRCLPGMEGAPVFAKNGHLIGILIRPLRQKNSGVEIQLVVPWGAITTACSHLLLEEPSVEGKASQWGSEVLSVKSDASIPAQVAIEKAMESVCLITVNDGVWASGIILNEHGLILTNAHLLEPWRYGKGGVYGEGFKPYVLGAEEFSSTGSKFWEQKSQTLPRKAPRNHYSSVGENIREYKHNFLQTG…
	AT1G31180.2		Group Ⅰ	353	DGIGPEVISVAKNVLQKAGFLQGLEFDFQEMPFGGAALDLVGVPLPEETSTAAKQSDAILLGAIGGYKWDKNEKHLRPEMGLLNIRRDLNVFANLRPATVLPQLVDASTLKKEVAQGVDMMIVRELTGGIYFGEPRGITINENGEEVGFNTEIYAAHEIDRIARVAFETARKRRGKLCSVDKANVLDASILWRKRVTALASEYPDVELSHMYVDNAAMQLVRDPKQFDTIVTNNIFGDILSDEASMITGSIGMLPSASLGESGPGLFEPIHGSAPDIAGQDKANPLATILSAAMLLKYGLGEEKAAKMIEDAVVDALNKGFRTGDIYSPGNKLVGCKEMGEEVLKSVDSKVPV
	AT1G53240.1		Group Ⅱ	274	GVAADVGHINTRSEVVGYMGDDNLAKALEGADLVIIPAGVPRKPGMTRDDLFNINAGIVKNLCTAIAKYCPHALINMISNPVNSTVPIAAEIFKKAGMYDEKKLFGVTTLDVVRARTFYAGKANVPVAEVNVPVIGGHAGVTILPLFSQATPQANLSSDILTALTKRTQDGGTEVVEAKAGKGSATLSMAYAGALFADACLKGLNGVPDVIECSYVQSTITELPFFASKVRLGKNGVEEVLDLGPLSDFEKEGLEALKPELKSSIEKGVKFANQ
	AT2G22780.1		Group Ⅰ	292	KMNPLVSVLHLYDVANAPGVTADISHMDTSAVVRGFLGQPQLEEALTGMDLVIIPAGVPRKPGMTRDDLFNINAGIVRTLSEAIAKCCPKAIVNIISNPVNSTVPIAAEVFKKAGTFDPKKLMGVTMLDVVRANTFVAEVMSLDPREVEVPVVGGHAGVTILPLLSQVKPPCSFTQKEIEYLTDRIQNGGTEVVEAKAGAGSATLSMAYAAVEFADACLRGLRGDANIVECAYVASHVTELPFFASKVRLGRCGIDEVYGLGPLNEYERMGLEKAKKELSVSIHKGVTFAKK
	AT3G15020.1		Group Ⅱ	274	GVAADVGHINTRSQVSGYMGDDDLGKALEGADLVIIPAGVPRKPGMTRDDLFNINAGIVKNLSIAIAKYCPQALVNMISNPVNSTVPIAAEIFKKAGTYDEKKLFGVTTLDVVRARTFYAGKSDVNVAEVNVPVVGGHAGITILPLFSQASPQANLSDDLIRALTKRTQDGGTEVVEAKAGKGSATLSMAYAGALFADACLKGLNGVPNVVECSFVQSTITELPFFASKVRLGKNGVEEVLDLGPLSDFEKEGLEALKAELKSSIEKGIKFANQ
	AT3G47520.1		Group Ⅰ	333	DKKPYGFKINASYKVAVLGAAGGIGQPLSLLIKMSPLVSTLHLYDIANVKGVAADLSHCNTPSQVRDFTGPSELADCLKDVNVVVIPAGVPRKPGMTRDDLFNINANIVKTLVEAVAENCPNAFIHIISNPVNSTVPIAAEVLKKKGVYDPKKLFGVTTLDVVRANTFVSQKKNLKLIDVDVPVIGGHAGITILPLLSKTKPSVNFTDEEIQELTVRIQNAGTEVVDAKAGAGSATLSMAYAAARFVESSLRALDGDGDVYECSFVESTLTDLPFFASRVKIGKNGLEAVIESDLQGLTEYEQKALEALKVELKASIDKGVAFANKPAAAAAN
	AT5G09660.4		Group Ⅰ	300	MNPLVSLLHLYDVVNAPGVTADVSHMDTGAVVRGFLGAKQLEDALTGMDLVIIPAGIPRKPGMTRDDLFKINAGIVKTLCEGVAKCCPNAIVNLISNPVNSTVPIAAEVFKKAGTYDPKKLLGVTTLDVARANTFVAEVLGLDPREVDVPVVGGHAGVTILPLLSQVKPPSSFTPQEIEYLTNRIQNGGTEVVEAKAGAGSATLSMAYAAAKFADACLRGLRGDANVVECSFVASQVNLENSFTLFHCFNGFNLKWQLTTGDRISFLCNKSAPWPYRSRGSVSAWTLKRIRKDWSGESKR
	AT5G43330.1		Group Ⅰ	266	KGVVATTDAVEACTGVNVAVMVGGFPRKEGMERKDVMSKNVSIYKSQASALEKHAAPNCKVLVVANPANTNALILKEFAPSIPEKNITCLTRLDHNRALGQVSERLSVPVSDVKNVIIWGNHSSTQYPDVNHATVKTSVGEKPVRELVKNDEWLNGEFISTVQQRGAAIIKARKLSSALSAASSACDHIRDWVVGTPEGTFVSMGVYSDGSYNVPAGLIYSFPVTCRNGEWTIVQGLPIDDASRKKMDLTAEELKEEKDLAYSCLS
	AT5G56720.1		Group Ⅰ	305	IMLGPDQPMILHLLDIEPASSSLEAVKMELQDSAFPLLKGVIATTNVVEACKDVNIVIMIGGFPRIAGMERKDVMSKNVVIYKAQASALERYASDDCKVLVVANPANTNALILKEFAPSIPEENITCLTRLDHNRALAQLADKLSVPVSSVKNVIVWGNHSSTQYPDTNHATVSTKTGDRPLKELVTDHNWLKNEFIVEVQQRGAAVLRARKQSSAFSAAGAACDHIRDWFLGTPKGTWVSMGVCSDGSYGIPPGLVYSFPVICEKGSWKIVQGLSIDEFSREKMDDSARELAEEKDLAYSCLNV
	AT5G58330.1		Group Ⅰ	371	TKKECYGVFCLTYDLKAEEETRSWKKLINIAVSGAAGMISNHLLFKLASGEVFGPDQPIALKLLGSERSIQALEGVAMELEDSLFPLLREVDIGTDPNEVFQDVEWAILIGAKPRGPGMERADLLDINGQIFAEQGKALNKAASPNVKVLVVGNPCNTNALICLKNAPNIPAKNFHALTRLDENRAKCQLALKAGVFYDKVSNMTIWGNHSTTQVPDFLNARINGLPVKEVITDHKWLEEGFTESVQKRGGLLIQKWGRSSAASTAVSIVDAIKSLVTPTPEGDWFSTGVYTDGNPYGIEEGLVFSMPCRSKGDGDYELVKDVEIDDYLRQRIAKSEAELLAEKRCVAHLTGEGIAYCDLGPVDTMLPGEV
Oryza sativa	LOC_Os01g61380	OsMDH1	Group Ⅰ	396	MASTVAINLIGAQAGIISKLRNCDITSYSGLKARSSISFESRSSFLGQNASLRSSISPRIVPKANSGSHISPEASYKVAVLGAAGGIGQPLGLLIKMSPLVSALHLYDIANVKGVAADLSHCNTPSQVLDFTGPSELANCLKGVDVVVIPAGVPRKPGMTRDDLFNINASIVKTLVEAVADNCPEAFIHIISNPVNSTVPIAAEVLKQKGVYNPKKLFGVTTLDVVRANTFIAQKKNLKLIDVDVPVVGGHAGITILPLLSKTRPSVTFTNEETEELTRRIQNAGTEVVEAKAGAGSATLSMAYAAARFVESSLRALAGDPDVYECTFVQSELTELLFFASRVKLGKNGVESIISSDLEGVTEYEAKALESLKPELKASIEKGIEFVHKQQAAATS
	LOC_Os01g46070	OsMDH1.2	Group Ⅲ	340	MRPSLMRSASQVLRRRRGYSSASGQPERKVAILGAAGGIGQPLSLLMKLNPLVSSLSLYDIAGTPGVAADVSHINAPAQVKGFMGDDQLGEALEGSDIVIIPAGVPRKPGMTRDDLFNINAGIVKNLCTAIAKYCPNALVNMISNPVNSTVPIAAEVFKKAGTYDEKKLFGVTTLDVVRAKTFYAGKANVPVTDVNVPVVGGHAGITILPLFSQATPATNALSDEDIKALTKRTQDGGTEVVEAKAGKGSATLSMAYAGAVFANACLKGLNGVPDVVECSFVQSTVTELPFFASKVKLGKNGVEEVLGLGQLSDFEKEGLENLKGELKASIEKGIKFANA
	LOC_Os02g01510	OsMDH2.1	Group Ⅰ	392	MSHKTTIDHFHFHFQERSTSPLAFHPVSEGGRSRSRSRDMKKASSLSELGFDAEGASSGFFRPVADGGSTPTSHRRRLTKISVIGAGNVGMAIAQTILTRDMADEIALVDAVPDKLRGEMLDLQHAAAFLPRVRLVSDTDLAVTRGSDLAIVTAGARQIPGESRLNLLQRNVALFRKIVPALAEHSPEALLLIVSNPVDVLTYVAWKLSGFPASRVIGSGTNLDSSRFRFLLAEHLQVNAQDVQAYMVGEHGDSSVAIWSSMSVAGMPVLKSLRESHQSFDEEALEGIRRAVVDSAYEVISLKGYTSWAIGYSVASLAASLLRDQHRIHPVSVLASGFHGIPQDHEVFLSLPARLGRAGVLGVAEMELTEEEARRLRRSAKTLWENCQLLDL
	LOC_Os03g56280	OsMDH3.1	Group Ⅰ	354	MQPDSASHRIARVAAHLSPSPRPQMEEGVRPAPCRAKGGAPGFKVAVLGAAGGIGQPLSLLMKLNPLVSVLHLYDVVNTPGVTADVSHMDTTAVVRGFLGPNQLEAALTGMDLVIIPAGLPRKPGMTRDDLFNKNAGIVRSLCEGVAKCCPNAIVNLISNPVNSTVPIAAEVFKKAGTYDPKRLLGVTTLDVARANTFVAEVLGIDPKDVNVPVVGGHAGVTILPLLSQVHPPCSFTPDEISYLTKRIQNGGTEVVEAKAGAGSATLSMAFAAAKFGDACLRAMRGDAGVVECSYVASAVTELPFFATKVRLGRAGAEEVLPLGPLNDFERAGLEMAKKELMESIQKGIDFMNK
	LOC_Os04g46560	OsMDH4.1	Group Ⅰ	352	MMSSNSLFQRLAKWCPWLLRDEPKKPVKVLVTGAAGQIGYAIVAMIARGLMLGADQPVVLHLLDLPVAANALNGVRMELIDAALPLLRGVVATSDEAEAFKGVNVAIVIGGWPRRDGMERKDLISKNVTIYKSQASALHQHAAPNCKVLVVANPANTNALVLKEFAPAIPAKNITCLTRLDHNRALGQVAEKLNVHVGDVKNAIIWGNHSSTQFPDASHATVSTDRGERPVRELIADEIWLREEFVTDVQQRGAAVIKARKQSSSLSAASAACDHMRDWILGTPKGTWVSMGVYSDGSYGVPEGVFFSFPVTCEKGEWSVVQGLEIDDFARSKMETSATELKEEKSIAYEFL
	LOC_Os05g49880	OsMDH5.1	Group Ⅲ	340	MRPSLLRYAAQALRRRDYSSAAAAAERKVAILGAAGGIGQPLALLMKLNPLVSSLSLYDIAGTPGVAADVSHINSPALVKGFVGEEQLGEALEGSDVVIIPAGVPRKPGMTRDDLFNINAGIVKGLCTAISKYCPNALVNMISNPVNSTVPIAAEVFKKAGTYDEKKLFGVTTLDVVRAKTFYAGKANVPVTEVNVPVVGGHAGITILPLFSQATPASNALSHEDIKALTKRTQDGGTEVVEAKAGKGSATLSMAYAGAVFADACLKGLNGVPDVVECSFVQSTVTELPFFASKVRLGKNGVEEVLGLGQLSEFEKEGLENLKGELKSSIEKGIKFAHAN
	LOC_Os06g01590	OsMDH6.1	Group Ⅰ	360	MKKASSLSELGFDADGPSFFRHLTLTDGDDGTLPRRRLIKISVIGAGNVGMAIAQTILTQDLADEIVLIDAVADKVRGEMLDLQHAAAFLPRVNIVSGTEVSLTRSSDLVIVTAGARQIPGETRLNLLQRNVSLFRKIVPAAAEASPESVLVIVSNPVDVLTYVAWKLSGFPASRVIGSGTNLDSSRFRFLLAEHLEVSAQDVQAYMVGEHGDSSVALWSSISVGGMPVLAHLQKNHRSAATAKKFDEAALEGIRRAVVGSAYEVIKLKGYTSWAIGYSVASIAWSLLRDQRRIHPVSVLAKGLVRGVPADRELFLSLPARLGRAGVLGVAAELVLTDEEERRLRISAETLWGYCHALGL
	LOC_Os07g43700	OsMDH7.1	Group Ⅰ	404	MASAAMSTLNLSSSPLTKQQLRFGASTLSAEHVSGFSSARPAPSLCCSSSHWRAVKLRPRRRPWRRAGNRVVAQAGGYKVAILGAAGGIGQPLSLLVKMSPLVSALHLYDIANVDGVTADLGHCNTPAKVAGFTGKEELAGCLAGVDVVVIPAGVPRKPGMTRDDLFGINAGIVRELVEAVADHAPAALVHVISNPVNSTVPIAAEVLKRKGVYDPRKLFGVTTLDVVRANTFVAEMKGLPLADVDVPVVGGHAAATILPLLSKARPKTAFTDEEVEALTRRIQNAGTEVVEAKAKAGGGSATLSMAYAAARFLEASLRGLDGDADVYECSYVQCQAVPELPFFACRVKLGRDGVEEVAAAGAELRGLTEFEARALEALKPQLKKSIDKGVAYAQQQPA…
	LOC_Os08g33720	OsMDH8.1	Group Ⅰ	397	MASAVTISSVGAQAGMISKPRNHGFTSYSGLKAASSVSFESGSSFLGRNASLRASVAPRIVPKAKSGSQISPEASYKVAVLGAAGGIGQPLGLLIKMSPLVSELHLYDIANVKGVAADLSHCNTPSQVLDFTGPSELANCLKGVDVVVIPAGVPRKPGMTRDDLFNINASIVKSLVEAVADNCPEAFIHIISNPVNSTVPIAAEVLKQKGVYNPKKLFGVTTLDVVRANTFVAQKKNLKLIDVDVPVVGGHAGITILPLLSKTMPSVTFTDEETEQLTKRIQNAGTEVVEAKAGAGSATLSMAYAAARFVESSLRALAGDPDVYECTFVQSELTELPFFASRVKLGKNGVESIISADLEGVTEYEAKALEALKSELKASIEKGIEFVHKQQTAAASV
	LOC_Os08g44810	OsMDH8.2	Group Ⅰ	433	MAAIDLSSPARSSPAPLSPRRGSLHLLLRRPRRPTLRCSLDAAPKQAQAQGPPAAVAAEEAPTARKECYGVFCTTYDLRADEKTKSWKSLVNVAVSGAAGMISNHLLFKLASGEVFGPDQPIALKLLGSERSIQALEGVAMELEDSLYPLLREVSIGIDPYVVFEDAEWALLIGAKPRGPGMERSALLDINGQIFAEQGKALNSVASRNVKVIVVGNPCNTNALICLKNAPNIPAKNFHALTRLDENRAKCQLALKAGVFYDKVSNMTIWGNHSTTQVPDFLNAKINGRPVKEVIKDTKWLEDEFTKTVQKRGGVLIQKWGRSSAASTAVSIVDAIRSLVNPTPEGDWFSTGVYTTGNPYGIAEDIVFSMPCRSKGDGDYELVKDVAMDDFLWERIKKS…
	LOC_Os10g33800	OsMDH10.1	Group Ⅰ	332	MAKEPMRVLVTGAAGQIGYALVPMIARGVMLGADQPVILHMLDIPPATESLNGLKMELVDAAFPLLKGIVATTDVVEACTGVNVAVMVGGFPRKEGMERKDVMSKNVSIYKSQASALEAHAAPNCKVLVVANPANTNALILKEFAPSIPEKNITCLTRLDHNRALGQISEKLNVQVTDVKNAIIWGNHSSTQYPDVNHATVKTPSGEKPVRELVADDEWLNTEFISTVQQRGAAIIKARKQSSALSAASSACDHIRDWVLGTPEGTFVSMGVYSDGSYGVPAGLIYSFPVTCSGGEWTIVQGLPIDEFSRKKMDATAQELSEEKTLAYSCLN
	LOC_Os12g43630	OsMDH12.1	Group Ⅰ	356	MEDAAAAARRMERLASHLRPPASQMEESPLLRGSNCRAKGAAPGFKVAILGASGGIGQPLALLMKMNPLVSVLHLYDVVNTPGVTADISHMNTGAVVRGFLGQPQLENALTGMDLVIIPAGVPRKPGMTRDDLFNINAGIVRTLCEGIAKCCPNAIVNVISNPVNSTVPIAAEVFKKAGTYDPKRLLGVTTLDVVRANTFVAEVLGLDPRDVNVPVIGGHAGVTILPLLSQVNPPCSFTSEEISYLTTRIQNGGTEVVEAKAGAGSATLSMAYAASKFADACLRGLRGDAGIVECSFVASQVTELPFFASKVRLGRCGIEEILSLGPLNEFERAGLEKAKKELAESIQKGVAFINK
Populus trichocarpa	POPTR_001G287400	PtMDH1	Group Ⅰ	356	MESIREASQRIARISAHLQPPNSQTEESCVLKRADCRAKGGAPGFKVAILGAAGGIGQPLAMLMKMNPSVSVLHLYDVVNTPGVTADIGHMDTGAVVRGFLGQPQLENALTGMDLVIIPAGVPRKPGMTRDDLFNINAGIVITLCEGIAKCCPNAIVNLISNPVNSTVPIAAEVFKKAGTYDPKRLLGVTMLDVVRANTFVAEVLGLHPKEVDVPVVGGHAGVTILPLLSQVKPPSSFTPEETEYLTKRIQDGGTEVVQAKAGAGSATLSMAYAAVKFADACLRGLRGDAGVVECAFVASEVTELPFFATKVRLGRRGAEEVYQLGPLNEYERVGLGRAKKELAESIQKGVSFIRK
	POPTR_001G376500	PtMDH2	Group Ⅰ	344	MRNSMLRSIKSLTTSPSSHVLRRGYASEAVPERKVAVLGAAGGIGQSLSLLMKLNPLVSNLALYDIANTPGVAADVSHINTRSEVVGYASDAELGKALEGADVVIIPAGVPRKPGMTRDDLFNINAGIVKGLCEAIAKHCPNALVNMISNPVNSTVPIAAEVFKKAGTYDPKRLFGVTTLDVVRAKTFYAGKAMVPVAEVNVPVVGGHAGITILPLFSQATPKANLSDEVITALTKRTQDGGTEVVEAKAGKGSATLSMAYAGAIFADACLKGLNGVPDVIECSFVQSTVTELPFFASRVRLGKNGVEEVLGLGPLSDFEKEGLEKLKPELKSSIEKGIKFATQ
	POPTR_002G141700	PtMDH3	Group Ⅰ	364	MDHAVLLQKILVVSFIVALFWKIIRYMCNLLNVEKEPVRVLVTGAAGQIGYAIVPMIARGVMLGPDQPVILHLLDIEPAAEALNGVKMELIDAAFPLLKGVIATTDPIEACMGVNIAVMVGGFPRKEGMERKDVMSKNVSIYKAQASALEKHAAEDCKVLVIANPANTNALILKEFAPSIPEKNITCLTRLDHNRALGQISESLDVQVSDVKNVIIWGNHSSTQYPDVNHATVQTSSGEKPVRELVSDDKWLNAEFITTVQQRGAAVIKARKLSSALSAASAACDHIRDWVLGTPEGTWVSMGVYSDGSYGIQPGLVYSFPVTCEKGKWSIVQGLKIDDFSRAKMDATAKELVEEKSLAYSCLN
	POPTR_002G141900	PtMDH4	Group Ⅰ	334	MPKDAVRILVTGAAGQIGYALAPMIARGIMLGPDQPVILHLLDIQPVAESLKGVRMELIDAAFPLLQGILATTDVNEACKGVNIAVMVGGFPCKEGMERRDVMHKNVPIFKAQASALEQHAAPDCKILVVANPANTNALILKEFAPSIPVKNITCLTRLDHNRALSHISERLNVDVRDVKNVIIWGNHSSTQYPDANYAIATTDIGEKSVRELVADDHWIDYEYINSVRERGAEIIKARKLSSALSAASAACDHVHDWIIGTAKGTWVSMGVYSDGSYGIQPDIIYSFPVTCQKGEWSIVQGLKINEFSREKMDTSMKELTREESLAYSCLNQT
	POPTR_004G054200	PtMDH5	Group Ⅲ	348	MKAAVLRSSRAALRPCTCRHLVGRSYSSTESSPESKVAILGAAGGIGQPLALLMKLNPLISSLSLYDIANTPGVAADVSHINSRAQVAGYAGEEQLGEALDGSDIVIIPAGVPRKPGMTRDDLFKINAGIVKSLCTAIAKYCPNALVNMISNPVNSTVPIAAEVFKKAGTFDERKLFGVTTLDVVRAKTFYAGKVKVPVAEVNVPVVGGHAGITILPLFSQAAPKSSNLSDDDIKALTKRTQDGGTEVVEAKAGKGSATLSMAYAGAVFADACLKGLNGVPDIVECSFVQSSITDLPFFASKVRLGKNGVEEVFGLGPLSDYEQQGLESLKPELKASIEKGVEFANQN
	POPTR_004G112800	PtMDH6	Group Ⅰ	412	MAATSAATFSAGSTVAFGTKASQLPQSKPSAVRFKSQKSLATFSGLKAATFVKCESESSFLGKESSAALRGSVVPKAQKSSQKSQYHLNPQASYKVAILGAAGGIGQPLALLVKMSPLVSALHLYDIANVKGVAADISHCNTPAQVLDFTGASELPNSLKGVDVVVIPAGIPRKPGMTRDDLFNINASIVKNLVEAVADNCPDAFIHIISNPVNSTVPIAAEVLKKKGVYDPKKLFGVTTLDVVRANTFVAQKKNLKLIDVDVPVVGGHAGITILPLLSKTKPSVSFTDEEVQELTVRIQNAGTEVVQAKAGAGSATLSMAYAAARFVESSLRALDGDADVYECSFVQSDLTELPFFASRVKLGRKGVEALISSDLQGLTTYEQEALEALKPELKASIE…
	POPTR_007G009100	PtMDH7	Group Ⅰ	354	MQQSNLRIARIAAHINPPNLQMVEEDLGLERVNCRAKGASSGFKVAILGAAGGIGQPLAMLMKMNPLVSLLHLYDVVNAPGVTADISHMDTSAVVRGFLGQQQLEDALIGMDLVIIPAGVPRKPGMTRDDLFNINAGIVKTLCEAIAKCCPKAIVNIISNPVNSTVPIAAEVFKKAGVFDPKRVLGVTMLDVVRANTFVAEIMGLDPREVDVPVVGGHAGVTILPLLSQVKPLCSFTQKEIDYLTDRIQNGGTEVVEAKAGAGSATLSMAYAAVKFADACLRALRGDAAVVHCAYVASAVTELPFFASKVRLGRNGVEEIYPLGPLNDYERAGLEKAKKELAGSIQKGVSFVKK
	POPTR_008G031700	PtMDH8	Group Ⅰ	456	MSVADLTTSPVTSTYTKTSSRLHSPQLSLSSTRLSVHFSRSPRPNPRAQNFKITCSVNQVPAPVAVQTEEAKSKSECFGVFCQTYDLKAEEETKSWKKLINVAVSGAAGMISNHLLFKLASGEVFGPDQPIALKLLGSERSFQALEGVAMELEDSLYPLLREVSIGINPYEVFEDVEWALLIGAKPRGPGMERAGLLDINGQIFAEQGKALNAVASRNVKVIVVGNPCNTNALICLKNAPNIPAKNFHALTRLDENRAKCQLALKAGVFYDKVSNMTIWGNHSTTQVPDFLNARINGIPVKEVIKDHKWLEEEFTEKVQKRGGVLIQKWGRSSAASTAVSIADAMKSLVTPTPEGDWFSSGVYTSGNPYGIAQDIVFSMPCRSKGDGDYELVKDVTFDE…
	POPTR_008G166800	PtMDH9	Group Ⅰ	392	MAKEPVRVLVTGAAGQIGYALVPMIARGVMLGPDQPVILHMLDIPPAAEALNGVKMELVDAAFPLLKGVVATTDVVEACTGVNIAVMVGGFPRKEGMERKDVMSKNVSIYKSQASALEKHAAANCKVLVVANPANTNALILKEFAPSISEKNITCLTRLDHNRALGQISERLSVQVCDVKNVIIWGNHSSSQYPDVNHATVKTPAGEKPVRELVKDDEWLNAEFITTVQQRGAAIIKARKLSSALSAASSACDHIRDWVLGTPEGTWVSMGVYSDGSYNVPAGLIYSFPVTCQNGEWKIVQGKDCQLKCHHFPLTLHDFMPIYEIIIVRYYLFLVNVQDSFVCISGILVLFLWCLLVTAYIFMMYFLSLKTCSFSCFPCTSVICSNLMFSFA
	POPTR_009G081600	PtMDH10	Group Ⅰ	343	MESVANQRIARMEESCVLKRTDCRAKGGAPGFKVAILGAAGGIGQPLAMLMKMNPLVSVLHLYDVVNAPGVTADISHMDTGAVVRGFLGQPQLESALTGMDLVIIPAGVPRKPGMTRDDLFKINAGIVRTLCEGVAKCCPNAIVNLISNPVNSTVPIAAEVFKKAGTYDPKRLLGVTMLDVVRANTFVAEVLGLDPREVDVPVVGGHAGVTILPLLSQAKPPSSFTPEETEYLTKRIQDGGTEVVQAKAGAGSATLSMAYAAVKFADACLRGLRGDAGVVECAFIASEVTELPFFATKVRLGRRGAEEVYQLGPLNEYERVGLQKAKKELAESIQKGISFIRK
	POPTR_010G071000	PtMDH11	Group Ⅰ	332	MAKEPARVLVTGAAGQIGYALVPMIARGVMLGPDQPVILHMLDIPPAAEALNGVKMELVDAAFPLLKGVVATTDVVEACTGVNIAVMVGGFPRKEGMERKDVMSKNVSIYKSQASALEKHAAANCKVLVVANPANTNALILKEFAPSIPEKNITCLTRLDHNRALGQISERLNVQVSDVKNVIIWGNHSSTQYPDVNHATVKTPAGEKPVRELVKDDAWLNAEFITTVQQRGAAIIKARKLSSALSAASSACDHIHDWVLGTPEGTWVSMGVYSDGSYNVPAGLIYSFPVTCQNGEWKIVQGLSIDEFSRKKLDLTADELSEEKALAYSCLT
	POPTR_011G096300	PtMDH12	Group Ⅰ	367	MMLRSIKSLATSPSSHILRRGYASEAVPDRKVAVLGAAGGIGQPLALLMKLNPLVSSLALYDIANTPGVAADVSHINTRSEVSGYSGEAELGKALEGADVVIIPAGVPRKPGMTRDDLFNINAGIVKGLCQAIAKYCPHALVNMISNPVNSTVPIAAEVFKKAGTYDPKRLFGVTTLDVVRAKTFYAGKAKVPVAEVNVPVVGGHAGITILPLFSQATPKANLSDAEITALTKRTQDGGTEVVEAKAGKGSATLSMAYAGAIFADACLKGLNGAPDVVECSYVQSTITELPFFASKISLMKKGSLLCEGSLMLCTFIRCSTLVRLGKNGVEEVLGLGPLSDYEKEGLEKLKPELQSSIEKGIKFANQ
	POPTR_017G101900	PtMDH13	Group Ⅰ	412	MAATSAATFSIGSTISLGTKGSQLPQSKPLSVRFNSQNTLATFSGLKAAIFVKCESESSFLGKESSAALRGAAAPKAQKSSQRSQYNLNPQASYKVAILGAAGGIGQPLALLVKMSPLISALHIYDIANVKGVAADLSHCNTPSQVLGFTGSSELPNSLKGVDVVVIPAGVPRKPGMTRDDLFSINANIVKTLVEAVADNCPDAFIHIISNPVNSTLPIAAEVLKQKGVYDPKKLFGVTTLDVVRANTFVAQKKNLKLIDVDVPVVGGHAGITILPLLSKTRPPVSFNDEEVQELTVRIQNAGTEVVEAKEGAGSATLSMAYAAARFVESSLRALDGDADVYECSFVQSDLTELPFFASRVKLGRKGVEAIISSDLQGLTEYEQKALEALKPELKASIE…
	POPTR_017G102000	PtMDH14	Group Ⅰ	412	MAAASAATFSVGSAFSFGTKASQLPQSKLSSVRFNSQSSLATFSGLKAATFVTCESESSFLGKESNAALRCSVAPKAQKSSQRSQHRLNPQASYKVAVLGAAGGIGQPLALLIKMSPLVSALHLYDIANVKGVAADLSHCNTPSQVLDFTGAAELPNSLKGVDIVVIPAGVPRKPGMTRDDLFNINASIVKTLVEAVADNCPDAFIHIISNPVNSTVPIAAEVLKKKGVYDPKKLFGVTTLDVVRANTFVAEKKNLKLIDVDVPVVGGHAGITILPLLSKTKPSVSFTDEEVQELTVRIQNAGTEVVEAKAGAGSATLSMAYAAARFVESSLRALDGDADVYECSFVQSDLTDLPFFASRVKLGRKGVETIISSDLQGLTEYEQKALEALKPELKASIE…
	POPTR_017G152000	PtMDH15	Group Ⅲ	262	MKAAVLRSSRAALRPCTSRHLVGRSYSSTESRPERKVAILGAAGGIGQPLALLLKLNPLISSLSLYDIANTPGVAADVSHINSRAQVAGYAGEEQLVEALDGSDVVIIPAGVPRKPGMTRDDLFKINAGIVKSLCTAIAKYCPNALVNMISNPVNSTVPIAAEVFKNAGTFDERKLFGVTTLDVVRAKTFYAGKVKVPVAEVNVPVVGGHAGITILPIFCHDPNPGSMTGNARAVSKGHPTYAKPQNKHIKRTIYSKIHSIS
	POPTR_T143500	PtMDH16	Group Ⅲ	348	MKAAVLRSSRAALRPCTSRHLVGRSYSSTESRPERKVAILGAAGGIGQPLALLMKLNPLISSLSLYDIANTPGVGADVSHINSRAQVAGYAGEEQLGEALDGSDIVIIPAGVPRKPGMTRDDLFKINAGIVKSLCTAIAKYCPNALVNMISNPVNSTVPIAAEVFKKAGTFDERKLFGVTTLDVVRARTFYAGKVKVPVAEVNVPVVGGHAGITILPLFSQAAPKSSNLSDDDIKALTKRTQDGGTEVVEAKAGKGSATLSMAYAGAVFADACLKGLNGVPDIVECSFVQSSITDLPFFASKVRLGKNGVEEVFGLGPLSDYEQQGLESLKPELKASIEKGVEFANQN

## Sheet: Table S4
Table S4. Prediction of regulatory transcription factors in EgMDHs' promoter regions
TF	Gene ID	Start position	End position	Strand	P-value	Binding site	Binding site description
Eucgr.A00102	EgMDH2	2766	2776	-	3.97e-07	GCCAGCTGGCA	PTHR13690:SF80 - TRANSCRIPTION FACTOR POSF21-RELATED
Eucgr.A00102	EgMDH2	2767	2777	+	3.97e-07	GCCAGCTGGCA	PTHR13690:SF80 - TRANSCRIPTION FACTOR POSF21-RELATED
Eucgr.A00102	EgMDH13	2486	2496	+	2.02e-06	TACAGCTGGCG	PTHR13690:SF80 - TRANSCRIPTION FACTOR POSF21-RELATED
Eucgr.A00189	EgMDH9	1679	1688	-	5.15e-06	CCGAATCTTT	PTHR26402:SF617 - TWO-COMPONENT RESPONSE REGULATOR ARR1-RELATED
Eucgr.A00553	EgMDH4	1955	1973	+	2.78e-06	tcacttttttctcctcctc	KOG3623 - Homeobox transcription factor SIP1
Eucgr.A00553	EgMDH4	686	704	+	5.99e-06	cctaatcttcttccatctc	KOG3623 - Homeobox transcription factor SIP1
Eucgr.A00553	EgMDH9	2913	2931	-	3.6e-06	CCTTTGCCTCTACCACCTC	KOG3623 - Homeobox transcription factor SIP1
Eucgr.A00553	EgMDH2	1409	1427	+	2.74e-06	tctcatcttccttcaccac	KOG3623 - Homeobox transcription factor SIP1
Eucgr.A00553	EgMDH2	1843	1861	+	4.09e-06	cttccctctccttcttccc	KOG3623 - Homeobox transcription factor SIP1
Eucgr.A00553	EgMDH2	1847	1865	+	1.34e-07	cctctccttcttccccctc	KOG3623 - Homeobox transcription factor SIP1
Eucgr.A00553	EgMDH2	1850	1868	+	2.68e-07	ctccttcttccccctccac	KOG3623 - Homeobox transcription factor SIP1
Eucgr.A00553	EgMDH10	2275	2293	+	1.52e-06	CCAccatcctctcctcctc	KOG3623 - Homeobox transcription factor SIP1
Eucgr.A00553	EgMDH10	2278	2296	+	6.61e-08	ccatcctctcctcctcctc	KOG3623 - Homeobox transcription factor SIP1
Eucgr.A00553	EgMDH10	2281	2299	+	1.28e-06	tcctctcctcctcctccga	KOG3623 - Homeobox transcription factor SIP1
Eucgr.A00553	EgMDH10	2284	2302	+	1.12e-06	tctcctcctcctccgacta	KOG3623 - Homeobox transcription factor SIP1
Eucgr.A00553	EgMDH10	2721	2739	-	5.25e-06	TCTCCAGCATCTCCTCCTC	KOG3623 - Homeobox transcription factor SIP1
Eucgr.A00553	EgMDH10	812	830	+	3.41e-06	ttccctcattttcctcatc	KOG3623 - Homeobox transcription factor SIP1
Eucgr.A00553	EgMDH8	1745	1763	+	5.38e-06	tttcctcctcctttttctt	KOG3623 - Homeobox transcription factor SIP1
Eucgr.A00553	EgMDH1	1967	1985	+	5.01e-06	tctctctctctacctcttc	KOG3623 - Homeobox transcription factor SIP1
Eucgr.A00553	EgMDH7	1590	1608	-	3.67e-06	CTTCTTTTTCCTCTTTTTC	KOG3623 - Homeobox transcription factor SIP1
Eucgr.A00553	EgMDH7	1596	1614	-	4.34e-06	CTTTTTCTTCTTTTTCCTC	KOG3623 - Homeobox transcription factor SIP1
Eucgr.A00553	EgMDH7	1650	1668	-	8.48e-06	CCTCCACAGTCTCCCCTTC	KOG3623 - Homeobox transcription factor SIP1
Eucgr.A00553	EgMDH7	1907	1925	+	2.52e-06	ccttacccttctctttctc	KOG3623 - Homeobox transcription factor SIP1
Eucgr.A00553	EgMDH7	1913	1931	+	5.49e-06	ccttctctttctctctctc	KOG3623 - Homeobox transcription factor SIP1
Eucgr.A00553	EgMDH14	1603	1621	-	3.67e-06	CTTCTTTTTCCTCTTTTTC	KOG3623 - Homeobox transcription factor SIP1
Eucgr.A00553	EgMDH14	1609	1627	-	4.34e-06	CTTTTTCTTCTTTTTCCTC	KOG3623 - Homeobox transcription factor SIP1
Eucgr.A00553	EgMDH14	1663	1681	-	1.74e-06	CCTCCACCGTCTCCCCTTC	KOG3623 - Homeobox transcription factor SIP1
Eucgr.A00553	EgMDH14	1909	1927	+	2.52e-06	ccttacccttctctttctc	KOG3623 - Homeobox transcription factor SIP1
Eucgr.A00553	EgMDH14	1915	1933	+	5.49e-06	ccttctctttctctctctc	KOG3623 - Homeobox transcription factor SIP1
Eucgr.A00553	EgMDH5	1639	1657	-	6.54e-07	CCTTTTCCTCCTCCTTTTT	KOG3623 - Homeobox transcription factor SIP1
Eucgr.A00553	EgMDH5	1642	1660	-	2.65e-07	TTTCCTTTTCCTCCTCCTT	KOG3623 - Homeobox transcription factor SIP1
Eucgr.A00553	EgMDH5	1645	1663	-	1.86e-06	CGCTTTCCTTTTCCTCCTC	KOG3623 - Homeobox transcription factor SIP1
Eucgr.A00553	EgMDH5	1689	1707	-	8.17e-06	CCACCGTCTCCACTTCATC	KOG3623 - Homeobox transcription factor SIP1
Eucgr.A00553	EgMDH5	1692	1710	-	1.55e-06	CCTCCACCGTCTCCACTTC	KOG3623 - Homeobox transcription factor SIP1
Eucgr.A00553	EgMDH12	1603	1621	-	3.67e-06	CTTCTTTTTCCTCTTTTTC	KOG3623 - Homeobox transcription factor SIP1
Eucgr.A00553	EgMDH12	1609	1627	-	3.19e-06	TCTTCTCTTCTTTTTCCTC	KOG3623 - Homeobox transcription factor SIP1
Eucgr.A00553	EgMDH12	1647	1665	-	8.48e-06	CCTCCACAGTCTCCCCTTC	KOG3623 - Homeobox transcription factor SIP1
Eucgr.A00553	EgMDH12	1911	1929	+	2.52e-06	ccttacccttctctttctc	KOG3623 - Homeobox transcription factor SIP1
Eucgr.A00553	EgMDH12	1917	1935	+	5.49e-06	ccttctctttctctctctc	KOG3623 - Homeobox transcription factor SIP1
Eucgr.A01091	EgMDH4	2029	2043	-	1.28e-06	CTGCGGCGCCGGTGA	PF00847 - AP2 domain (AP2)
Eucgr.A01091	EgMDH9	1212	1226	+	4.34e-06	cgacggcggtgcgag	PF00847 - AP2 domain (AP2)
Eucgr.A01091	EgMDH10	1960	1974	-	4.98e-06	AGGCGGTGGCAGCGG	PF00847 - AP2 domain (AP2)
Eucgr.A01091	EgMDH10	1973	1987	-	1.45e-06	GGACGGCGGAGGCAG	PF00847 - AP2 domain (AP2)
Eucgr.A01091	EgMDH10	2948	2962	+	8.71e-06	TGGCGGCGTCGTGGG	PF00847 - AP2 domain (AP2)
Eucgr.A01091	EgMDH11	2079	2093	-	6.53e-06	CGGCGGCGCCGTCTC	PF00847 - AP2 domain (AP2)
Eucgr.A01091	EgMDH11	2080	2094	+	5.5e-06	AGACGGCGCCGCCGT	PF00847 - AP2 domain (AP2)
Eucgr.A01091	EgMDH11	2082	2096	-	4.17e-07	CGACGGCGGCGCCGT	PF00847 - AP2 domain (AP2)
Eucgr.A01091	EgMDH11	2248	2262	-	7.39e-06	AGGCGGCGGCGTGCT	PF00847 - AP2 domain (AP2)
Eucgr.A01091	EgMDH11	2299	2313	-	1.15e-06	CGGCGGCGACGGCGT	PF00847 - AP2 domain (AP2)
Eucgr.A01091	EgMDH8	2692	2706	-	6.03e-06	TGGTGGCGACGGTGG	PF00847 - AP2 domain (AP2)
Eucgr.A01091	EgMDH3	1984	1998	+	1.81e-08	cagcggcggcggtgg	PF00847 - AP2 domain (AP2)
Eucgr.A01091	EgMDH3	1987	2001	+	6e-07	cggcggcggtggcaa	PF00847 - AP2 domain (AP2)
Eucgr.A01091	EgMDH3	2032	2046	+	2.75e-07	cggcggcggcgaggT	PF00847 - AP2 domain (AP2)
Eucgr.A01091	EgMDH3	2066	2080	-	1.55e-06	CCGCGGCGGAGAAGG	PF00847 - AP2 domain (AP2)
Eucgr.A01091	EgMDH1	2038	2052	-	1.68e-06	GGGCGGCGGAGGACG	PF00847 - AP2 domain (AP2)
Eucgr.A01091	EgMDH1	2116	2130	-	8.22e-06	CGGCGGCGCCGAGCA	PF00847 - AP2 domain (AP2)
Eucgr.A01091	EgMDH1	2120	2134	+	3.98e-06	CGGCGCCGCCGGCGG	PF00847 - AP2 domain (AP2)
Eucgr.A01091	EgMDH1	2215	2229	-	1.01e-06	CGGCGGCGACGCCGG	PF00847 - AP2 domain (AP2)
Eucgr.A01091	EgMDH1	2218	2232	-	4.9e-06	CGTCGGCGGCGACGC	PF00847 - AP2 domain (AP2)
Eucgr.A01571	EgMDH1	655	668	-	5.06e-06	CGTTAACGGCAATA	PTHR21499//PTHR21499:SF26 - ASPARTATE KINASE
Eucgr.A01575	EgMDH7	478	490	-	4.37e-06	TGCAATTATTGCT	PTHR24326:SF287 - HOMEOBOX-LEUCINE ZIPPER PROTEIN ATHB-22-RELATED
Eucgr.A01575	EgMDH14	492	504	-	4.37e-06	TGCAATTATTGCT	PTHR24326:SF287 - HOMEOBOX-LEUCINE ZIPPER PROTEIN ATHB-22-RELATED
Eucgr.A01575	EgMDH5	35	47	+	1.98e-07	ttcaattattgtt	PTHR24326:SF287 - HOMEOBOX-LEUCINE ZIPPER PROTEIN ATHB-22-RELATED
Eucgr.A01575	EgMDH12	375	387	-	4.37e-06	TGCAATTATTGCT	PTHR24326:SF287 - HOMEOBOX-LEUCINE ZIPPER PROTEIN ATHB-22-RELATED
Eucgr.A01648	EgMDH6	1204	1218	-	1.04e-07	CAAAAGTTAGGTAAA	PTHR10641//PTHR10641:SF636 - MYB-LIKE DNA-BINDING PROTEIN MYB
Eucgr.A01857	EgMDH6	64	73	-	3.15e-06	GAGAATCTGA	PTHR31312:SF1 - TRANSCRIPTION ACTIVATOR GLK1-RELATED
Eucgr.A02070	EgMDH3	1130	1144	-	2.63e-06	AAGAGACGTGTGTAT	PF02365 - No apical meristem (NAM) protein (NAM)
Eucgr.A02338	EgMDH8	927	941	-	2.53e-06	CTTCTAGATGCTACA	PTHR10015:SF168 - HEAT STRESS TRANSCRIPTION FACTOR B-2A
Eucgr.A02390	EgMDH2	2003	2013	-	5.18e-07	CTGCCACCGCC	PTHR31241:SF3 - DEHYDRATION-RESPONSIVE ELEMENT-BINDING PROTEIN 2F
Eucgr.A02390	EgMDH2	999	1009	-	8.46e-06	CCATCACCGCC	PTHR31241:SF3 - DEHYDRATION-RESPONSIVE ELEMENT-BINDING PROTEIN 2F
Eucgr.A02390	EgMDH10	1919	1929	+	8.74e-06	taaccaccgcc	PTHR31241:SF3 - DEHYDRATION-RESPONSIVE ELEMENT-BINDING PROTEIN 2F
Eucgr.A02390	EgMDH10	1954	1964	+	6.68e-06	gcaccaccgct	PTHR31241:SF3 - DEHYDRATION-RESPONSIVE ELEMENT-BINDING PROTEIN 2F
Eucgr.A02390	EgMDH10	1963	1973	+	5.18e-07	ctgccaccgcc	PTHR31241:SF3 - DEHYDRATION-RESPONSIVE ELEMENT-BINDING PROTEIN 2F
Eucgr.A02390	EgMDH10	1976	1986	+	9.54e-06	cctccgccgtc	PTHR31241:SF3 - DEHYDRATION-RESPONSIVE ELEMENT-BINDING PROTEIN 2F
Eucgr.A02390	EgMDH11	2251	2261	+	1.95e-06	ACGCCGCCGCC	PTHR31241:SF3 - DEHYDRATION-RESPONSIVE ELEMENT-BINDING PROTEIN 2F
Eucgr.A02390	EgMDH11	2302	2312	+	6.58e-06	CCGTCGCCGCC	PTHR31241:SF3 - DEHYDRATION-RESPONSIVE ELEMENT-BINDING PROTEIN 2F
Eucgr.A02390	EgMDH3	1985	1995	-	6.16e-07	CCGCCGCCGCT	PTHR31241:SF3 - DEHYDRATION-RESPONSIVE ELEMENT-BINDING PROTEIN 2F
Eucgr.A02390	EgMDH3	1988	1998	-	4.51e-07	CCACCGCCGCC	PTHR31241:SF3 - DEHYDRATION-RESPONSIVE ELEMENT-BINDING PROTEIN 2F
Eucgr.A02390	EgMDH3	1991	2001	-	3.02e-06	TTGCCACCGCC	PTHR31241:SF3 - DEHYDRATION-RESPONSIVE ELEMENT-BINDING PROTEIN 2F
Eucgr.A02390	EgMDH3	2033	2043	-	6.65e-07	TCGCCGCCGCC	PTHR31241:SF3 - DEHYDRATION-RESPONSIVE ELEMENT-BINDING PROTEIN 2F
Eucgr.A02390	EgMDH1	2041	2051	+	3.35e-07	CCTCCGCCGCC	PTHR31241:SF3 - DEHYDRATION-RESPONSIVE ELEMENT-BINDING PROTEIN 2F
Eucgr.A02390	EgMDH14	1671	1681	-	5.53e-06	CCTCCACCGTC	PTHR31241:SF3 - DEHYDRATION-RESPONSIVE ELEMENT-BINDING PROTEIN 2F
Eucgr.A02390	EgMDH5	1700	1710	-	5.53e-06	CCTCCACCGTC	PTHR31241:SF3 - DEHYDRATION-RESPONSIVE ELEMENT-BINDING PROTEIN 2F
Eucgr.A02417	EgMDH2	500	510	+	9.07e-06	gacaacttgca	PF00010 - Helix-loop-helix DNA-binding domain (HLH)
Eucgr.A02417	EgMDH3	45	55	-	6.45e-06	TTCAACTTGCA	PF00010 - Helix-loop-helix DNA-binding domain (HLH)
Eucgr.A02436	EgMDH7	1818	1832	-	5.13e-06	GAAGATGACGTGAGG	PTHR22952//PTHR22952:SF151 - CAMP-RESPONSE ELEMENT BINDING PROTEIN-RELATED
Eucgr.A02436	EgMDH14	1831	1845	-	5.13e-06	GAAGATGACGTGAGG	PTHR22952//PTHR22952:SF151 - CAMP-RESPONSE ELEMENT BINDING PROTEIN-RELATED
Eucgr.A02436	EgMDH12	1815	1829	-	5.13e-06	GAAGATGACGTGAGG	PTHR22952//PTHR22952:SF151 - CAMP-RESPONSE ELEMENT BINDING PROTEIN-RELATED
Eucgr.A02669	EgMDH2	1993	2013	-	5.77e-07	CTGCCACCGCCATTGCAGCAG	PF12300 - Protein of unknown function (DUF3628) (DUF3628)
Eucgr.A02669	EgMDH2	1996	2016	-	7.5e-06	GCTCTGCCACCGCCATTGCAG	PF12300 - Protein of unknown function (DUF3628) (DUF3628)
Eucgr.A02669	EgMDH10	1954	1974	+	3.22e-07	gcaccaccgctgccaccgcct	PF12300 - Protein of unknown function (DUF3628) (DUF3628)
Eucgr.A02669	EgMDH10	1957	1977	+	7.67e-06	ccaccgctgccaccgcctgcc	PF12300 - Protein of unknown function (DUF3628) (DUF3628)
Eucgr.A02669	EgMDH10	1960	1980	+	8.41e-06	ccgctgccaccgcctgcctcc	PF12300 - Protein of unknown function (DUF3628) (DUF3628)
Eucgr.A02669	EgMDH10	1973	1993	+	6.93e-06	ctgcctccgccgtcccaccac	PF12300 - Protein of unknown function (DUF3628) (DUF3628)
Eucgr.A02669	EgMDH10	2287	2307	+	2.43e-06	cctcctcctccgactaTGCCG	PF12300 - Protein of unknown function (DUF3628) (DUF3628)
Eucgr.A02669	EgMDH10	2939	2959	-	3.78e-06	ACGACGCCGCCACGGCCGAGC	PF12300 - Protein of unknown function (DUF3628) (DUF3628)
Eucgr.A02669	EgMDH11	2071	2091	-	9.43e-06	GCGGCGCCGTCTCCTGGATCG	PF12300 - Protein of unknown function (DUF3628) (DUF3628)
Eucgr.A02669	EgMDH11	2082	2102	+	2.72e-06	ACGGCGCCGCCGTCGTCCACC	PF12300 - Protein of unknown function (DUF3628) (DUF3628)
Eucgr.A02669	EgMDH11	2251	2271	+	1.18e-06	ACGCCGCCGCCTTCCTCCCCC	PF12300 - Protein of unknown function (DUF3628) (DUF3628)
Eucgr.A02669	EgMDH11	2296	2316	+	1.67e-06	ACTACGCCGTCGCCGCCGGGT	PF12300 - Protein of unknown function (DUF3628) (DUF3628)
Eucgr.A02669	EgMDH11	2302	2322	+	1.86e-06	CCGTCGCCGCCGGGTCCGACC	PF12300 - Protein of unknown function (DUF3628) (DUF3628)
Eucgr.A02669	EgMDH11	2977	2997	-	6.21e-06	GTGCCGCCTCCTCCTCGGTCA	PF12300 - Protein of unknown function (DUF3628) (DUF3628)
Eucgr.A02669	EgMDH11	2980	3000	-	6.25e-06	GCCGTGCCGCCTCCTCCTCGG	PF12300 - Protein of unknown function (DUF3628) (DUF3628)
Eucgr.A02669	EgMDH8	2689	2709	+	5.23e-07	ACGCCACCGTCGCCACCAGCA	PF12300 - Protein of unknown function (DUF3628) (DUF3628)
Eucgr.A02669	EgMDH3	1975	1995	-	7.09e-08	CCGCCGCCGCTGCCGCTTCTT	PF12300 - Protein of unknown function (DUF3628) (DUF3628)
Eucgr.A02669	EgMDH3	1978	1998	-	2.52e-10	CCACCGCCGCCGCTGCCGCTT	PF12300 - Protein of unknown function (DUF3628) (DUF3628)
Eucgr.A02669	EgMDH3	1981	2001	-	3.71e-09	TTGCCACCGCCGCCGCTGCCG	PF12300 - Protein of unknown function (DUF3628) (DUF3628)
Eucgr.A02669	EgMDH3	1984	2004	-	5.72e-06	TCATTGCCACCGCCGCCGCTG	PF12300 - Protein of unknown function (DUF3628) (DUF3628)
Eucgr.A02669	EgMDH3	2066	2086	+	5.43e-06	CCTTCTCCGCCGCGGATTCAG	PF12300 - Protein of unknown function (DUF3628) (DUF3628)
Eucgr.A02669	EgMDH1	2041	2061	+	7.95e-06	CCTCCGCCGCCCCGCGGCCGC	PF12300 - Protein of unknown function (DUF3628) (DUF3628)
Eucgr.A02669	EgMDH1	2119	2139	+	2.59e-06	TCGGCGCCGCCGGCGGGATCG	PF12300 - Protein of unknown function (DUF3628) (DUF3628)
Eucgr.A02669	EgMDH1	2218	2238	+	1.05e-06	GCGTCGCCGCCGACGTCGGCC	PF12300 - Protein of unknown function (DUF3628) (DUF3628)
Eucgr.A02669	EgMDH14	1661	1681	-	5.98e-06	CCTCCACCGTCTCCCCTTCAT	PF12300 - Protein of unknown function (DUF3628) (DUF3628)
Eucgr.A02669	EgMDH13	2328	2348	+	2.39e-06	CAGGCGCCGCCAGAACCTGCT	PF12300 - Protein of unknown function (DUF3628) (DUF3628)
Eucgr.A02669	EgMDH5	1690	1710	-	1.74e-06	CCTCCACCGTCTCCACTTCAT	PF12300 - Protein of unknown function (DUF3628) (DUF3628)
Eucgr.A02669	EgMDH5	1693	1713	-	6.21e-06	GATCCTCCACCGTCTCCACTT	PF12300 - Protein of unknown function (DUF3628) (DUF3628)
Eucgr.A02824	EgMDH1	2223	2235	-	1.59e-06	CGACGTCGGCGGC	PTHR31839:SF8 - DEHYDRATION-RESPONSIVE ELEMENT-BINDING PROTEIN 1A-RELATED
Eucgr.A02824	EgMDH1	2228	2240	+	6.96e-06	CGACGTCGGCCAC	PTHR31839:SF8 - DEHYDRATION-RESPONSIVE ELEMENT-BINDING PROTEIN 1A-RELATED
Eucgr.A02834	EgMDH3	2232	2243	-	9.18e-06	GTGGCCGACGTC	PTHR31839:SF8 - DEHYDRATION-RESPONSIVE ELEMENT-BINDING PROTEIN 1A-RELATED
Eucgr.A02834	EgMDH1	2223	2234	+	6.03e-07	GCCGCCGACGTC	PTHR31839:SF8 - DEHYDRATION-RESPONSIVE ELEMENT-BINDING PROTEIN 1A-RELATED
Eucgr.A02834	EgMDH1	2229	2240	-	9.18e-06	GTGGCCGACGTC	PTHR31839:SF8 - DEHYDRATION-RESPONSIVE ELEMENT-BINDING PROTEIN 1A-RELATED
Eucgr.A02834	EgMDH13	2297	2308	+	9.38e-06	TGTGCCGACATC	PTHR31839:SF8 - DEHYDRATION-RESPONSIVE ELEMENT-BINDING PROTEIN 1A-RELATED
Eucgr.B00023	EgMDH2	1006	1026	+	9.36e-06	atgggttaagttggtgggctc	PTHR10641:SF609 - MYB TRANSCRIPTION FACTOR
Eucgr.B00023	EgMDH5	1266	1286	-	4.44e-07	GTTTTGAAGGTAGGTGTGCTA	PTHR10641:SF609 - MYB TRANSCRIPTION FACTOR
Eucgr.B00023	EgMDH5	224	244	+	6.77e-08	ttgtcgttggttggtggacca	PTHR10641:SF609 - MYB TRANSCRIPTION FACTOR
Eucgr.B00377	EgMDH2	1489	1502	+	5.9e-06	atttggataatatt	PTHR12374:SF26 - F25A4.19 PROTEIN
Eucgr.B00502	EgMDH5	222	239	+	4.54e-06	atttgtcgttggttggtg	PTHR10641:SF641 - MYB FAMILY TRANSCRIPTION FACTOR
Eucgr.B00515	EgMDH4	1952	1970	-	7.71e-06	GAGGAGAAAAAAGTGAACT	PTHR31089:SF4 - CYCLIC DOF FACTOR 2-RELATED
Eucgr.B00515	EgMDH4	452	470	+	1.14e-06	aaaaaaaaaaaagaaaaaa	PTHR31089:SF4 - CYCLIC DOF FACTOR 2-RELATED
Eucgr.B00515	EgMDH4	459	477	+	8.78e-06	aaaaagaaaaaagataaag	PTHR31089:SF4 - CYCLIC DOF FACTOR 2-RELATED
Eucgr.B00515	EgMDH2	95	113	+	2.97e-06	atgattgaaaaaggaaaaa	PTHR31089:SF4 - CYCLIC DOF FACTOR 2-RELATED
Eucgr.B00515	EgMDH6	1493	1511	-	5.17e-06	AAATGCGAAAAAGGGAAGG	PTHR31089:SF4 - CYCLIC DOF FACTOR 2-RELATED
Eucgr.B00515	EgMDH10	1724	1742	-	1.98e-06	AAAAAAAAAAAAGGATCAA	PTHR31089:SF4 - CYCLIC DOF FACTOR 2-RELATED
Eucgr.B00515	EgMDH7	1578	1596	+	9.97e-06	agaaagaaaaaagaaaaag	PTHR31089:SF4 - CYCLIC DOF FACTOR 2-RELATED
Eucgr.B00515	EgMDH7	1584	1602	+	2.68e-06	aaaaaagaaaaagaggaaa	PTHR31089:SF4 - CYCLIC DOF FACTOR 2-RELATED
Eucgr.B00515	EgMDH7	1602	1620	+	3.92e-07	aaagaagaaaaaggaaaac	PTHR31089:SF4 - CYCLIC DOF FACTOR 2-RELATED
Eucgr.B00515	EgMDH14	1591	1609	+	9.97e-06	agaaagaaaaaagaaaaag	PTHR31089:SF4 - CYCLIC DOF FACTOR 2-RELATED
Eucgr.B00515	EgMDH14	1597	1615	+	2.68e-06	aaaaaagaaaaagaggaaa	PTHR31089:SF4 - CYCLIC DOF FACTOR 2-RELATED
Eucgr.B00515	EgMDH14	1615	1633	+	3.92e-07	aaagaagaaaaaggaaaac	PTHR31089:SF4 - CYCLIC DOF FACTOR 2-RELATED
Eucgr.B00515	EgMDH12	1597	1615	+	2.68e-06	aaaaaagaaaaagaggaaa	PTHR31089:SF4 - CYCLIC DOF FACTOR 2-RELATED
Eucgr.B01031	EgMDH6	903	915	-	9.4e-06	CCAAATTTAAAGA	KOG1171 - Metallothionein-like protein
Eucgr.B01031	EgMDH1	1473	1485	-	1.22e-06	CGAAATTTTAAAT	KOG1171 - Metallothionein-like protein
Eucgr.B01031	EgMDH13	1277	1289	+	8e-06	ttaaattttaaaa	KOG1171 - Metallothionein-like protein
Eucgr.B02626	EgMDH2	1323	1339	+	3.82e-06	aacaagaaaacaaaaat	PTHR10593//PTHR10593:SF50 - SERINE/THREONINE-PROTEIN KINASE RIO
Eucgr.B02626	EgMDH3	468	484	-	6.02e-06	AAAAAACAGACAAAAGC	PTHR10593//PTHR10593:SF50 - SERINE/THREONINE-PROTEIN KINASE RIO
Eucgr.B02626	EgMDH13	649	665	-	6.1e-07	CAGAAAAAGACAAATGC	PTHR10593//PTHR10593:SF50 - SERINE/THREONINE-PROTEIN KINASE RIO
Eucgr.B02626	EgMDH13	931	947	-	3.05e-07	CAGAAAAAGACAAATGT	PTHR10593//PTHR10593:SF50 - SERINE/THREONINE-PROTEIN KINASE RIO
Eucgr.B02800	EgMDH4	462	482	+	4.59e-06	aagaaaaaagataaagattaa	PTHR24078:SF261 - DNAJ (HSP40) HOMOLOG, SUBFAMILY A, MEMBER 3A
Eucgr.B03006	EgMDH6	1205	1219	-	6.38e-07	TCAAAAGTTAGGTAA	PTHR10641:SF581 - MYB TRANSCRIPTION FACTOR
Eucgr.B03392	EgMDH8	2547	2567	-	3.65e-06	CATGAGGCACGTGATGTTCTT	PTHR12565//PTHR12565:SF143 - STEROL REGULATORY ELEMENT-BINDING PROTEIN
Eucgr.B03392	EgMDH5	735	755	+	1.48e-06	cttaaagcacgtggtaatgac	PTHR12565//PTHR12565:SF143 - STEROL REGULATORY ELEMENT-BINDING PROTEIN
Eucgr.B03551	EgMDH11	1101	1110	+	4.62e-06	tgccgacaaa	PTHR31384:SF8 - AUXIN RESPONSE FACTOR 2
Eucgr.B03553	EgMDH3	482	499	-	5.03e-06	TTGACTACTTACCCTAAA	PTHR21654:SF10 - GT-2-RELATED PROTEIN
Eucgr.B03605	EgMDH9	1212	1226	-	5.68e-06	CTCGCACCGCCGTCG	PTHR31194//PTHR31194:SF5 - SHN SHINE , DNA BINDING / TRANSCRIPTION FACTOR
Eucgr.B03605	EgMDH10	1973	1987	+	1.5e-07	ctgcctccgccgtcc	PTHR31194//PTHR31194:SF5 - SHN SHINE , DNA BINDING / TRANSCRIPTION FACTOR
Eucgr.B03605	EgMDH10	2332	2346	+	5.65e-08	TCGTCACCGCCGGCG	PTHR31194//PTHR31194:SF5 - SHN SHINE , DNA BINDING / TRANSCRIPTION FACTOR
Eucgr.B03605	EgMDH11	2082	2096	+	1.65e-06	ACGGCGCCGCCGTCG	PTHR31194//PTHR31194:SF5 - SHN SHINE , DNA BINDING / TRANSCRIPTION FACTOR
Eucgr.B03605	EgMDH11	2299	2313	+	2.7e-07	ACGCCGTCGCCGCCG	PTHR31194//PTHR31194:SF5 - SHN SHINE , DNA BINDING / TRANSCRIPTION FACTOR
Eucgr.B03605	EgMDH11	2329	2343	+	5.65e-08	TCGTCACCGCCGGCG	PTHR31194//PTHR31194:SF5 - SHN SHINE , DNA BINDING / TRANSCRIPTION FACTOR
Eucgr.B03605	EgMDH3	1984	1998	-	5.75e-06	CCACCGCCGCCGCTG	PTHR31194//PTHR31194:SF5 - SHN SHINE , DNA BINDING / TRANSCRIPTION FACTOR
Eucgr.B03605	EgMDH3	1987	2001	-	6.78e-07	TTGCCACCGCCGCCG	PTHR31194//PTHR31194:SF5 - SHN SHINE , DNA BINDING / TRANSCRIPTION FACTOR
Eucgr.B03605	EgMDH3	2032	2046	-	7.08e-07	ACCTCGCCGCCGCCG	PTHR31194//PTHR31194:SF5 - SHN SHINE , DNA BINDING / TRANSCRIPTION FACTOR
Eucgr.B03605	EgMDH3	2035	2049	-	5e-06	CCGACCTCGCCGCCG	PTHR31194//PTHR31194:SF5 - SHN SHINE , DNA BINDING / TRANSCRIPTION FACTOR
Eucgr.B03605	EgMDH3	2129	2143	-	5.27e-06	CCGATCCCGCCGGCT	PTHR31194//PTHR31194:SF5 - SHN SHINE , DNA BINDING / TRANSCRIPTION FACTOR
Eucgr.B03605	EgMDH1	2038	2052	+	8.9e-07	CGTCCTCCGCCGCCC	PTHR31194//PTHR31194:SF5 - SHN SHINE , DNA BINDING / TRANSCRIPTION FACTOR
Eucgr.B03605	EgMDH1	2119	2133	+	2.92e-07	TCGGCGCCGCCGGCG	PTHR31194//PTHR31194:SF5 - SHN SHINE , DNA BINDING / TRANSCRIPTION FACTOR
Eucgr.B03605	EgMDH1	2126	2140	-	2.82e-06	CCGATCCCGCCGGCG	PTHR31194//PTHR31194:SF5 - SHN SHINE , DNA BINDING / TRANSCRIPTION FACTOR
Eucgr.B03605	EgMDH1	2215	2229	+	7.2e-07	CCGGCGTCGCCGCCG	PTHR31194//PTHR31194:SF5 - SHN SHINE , DNA BINDING / TRANSCRIPTION FACTOR
Eucgr.C00602	EgMDH4	1980	1992	+	9.28e-06	ggtccagatccgg	PTHR10071//PTHR10071:SF196 - TRANSCRIPTION FACTOR GATA GATA BINDING FACTOR
Eucgr.C00780	EgMDH4	2259	2272	+	2.32e-06	ATGGTCGGTGGCTT	PTHR31985:SF34 - ETHYLENE-RESPONSIVE TRANSCRIPTION FACTOR ERF018
Eucgr.C00780	EgMDH10	1976	1989	-	1.48e-06	TGGGACGGCGGAGG	PTHR31985:SF34 - ETHYLENE-RESPONSIVE TRANSCRIPTION FACTOR ERF018
Eucgr.C00958	EgMDH9	2364	2378	-	9.69e-06	ATCGTAAAGATGAAG	PTHR31079:SF3 - NAC DOMAIN CONTAINING PROTEIN 75-RELATED
Eucgr.C02148	EgMDH2	1993	2013	-	2.31e-06	CTGCCACCGCCATTGCAGCAG	PF03195 - Protein of unknown function DUF260 (DUF260)
Eucgr.C02148	EgMDH10	1954	1974	+	3.92e-07	gcaccaccgctgccaccgcct	PF03195 - Protein of unknown function DUF260 (DUF260)
Eucgr.C02148	EgMDH10	2014	2034	+	4.67e-06	ACTCCGCCTCATCCCTCGGCC	PF03195 - Protein of unknown function DUF260 (DUF260)
Eucgr.C02148	EgMDH10	2287	2307	+	4.71e-06	cctcctcctccgactaTGCCG	PF03195 - Protein of unknown function DUF260 (DUF260)
Eucgr.C02148	EgMDH10	2290	2310	+	3.14e-06	cctcctccgactaTGCCGTCA	PF03195 - Protein of unknown function DUF260 (DUF260)
Eucgr.C02148	EgMDH10	2840	2860	+	1.14e-06	CCTCCTCCGCGATCAGCGCAG	PF03195 - Protein of unknown function DUF260 (DUF260)
Eucgr.C02148	EgMDH11	2284	2304	+	2.04e-07	CGGCCTCCGTCGACTACGCCG	PF03195 - Protein of unknown function DUF260 (DUF260)
Eucgr.C02148	EgMDH11	2293	2313	+	1.89e-06	TCGACTACGCCGTCGCCGCCG	PF03195 - Protein of unknown function DUF260 (DUF260)
Eucgr.C02148	EgMDH11	2296	2316	+	4.5e-06	ACTACGCCGTCGCCGCCGGGT	PF03195 - Protein of unknown function DUF260 (DUF260)
Eucgr.C02148	EgMDH11	2320	2340	+	8.55e-06	ACCTCTGCATCGTCACCGCCG	PF03195 - Protein of unknown function DUF260 (DUF260)
Eucgr.C02148	EgMDH3	1978	1998	-	5.7e-08	CCACCGCCGCCGCTGCCGCTT	PF03195 - Protein of unknown function DUF260 (DUF260)
Eucgr.C02148	EgMDH3	1981	2001	-	3.09e-07	TTGCCACCGCCGCCGCTGCCG	PF03195 - Protein of unknown function DUF260 (DUF260)
Eucgr.C02148	EgMDH3	1984	2004	-	4.1e-06	TCATTGCCACCGCCGCCGCTG	PF03195 - Protein of unknown function DUF260 (DUF260)
Eucgr.C02148	EgMDH3	2203	2223	+	2.89e-07	ATATCGCCGGCACTCCCGGCG	PF03195 - Protein of unknown function DUF260 (DUF260)
Eucgr.C02148	EgMDH3	2207	2227	-	1.26e-06	GCGACGCCGGGAGTGCCGGCG	PF03195 - Protein of unknown function DUF260 (DUF260)
Eucgr.C02148	EgMDH3	2221	2241	+	6.26e-06	GCGTCGCCGCGGACGTCGGCC	PF03195 - Protein of unknown function DUF260 (DUF260)
Eucgr.C02148	EgMDH1	2054	2074	+	6.2e-06	GCGGCCGCACCTCCTCCGCCG	PF03195 - Protein of unknown function DUF260 (DUF260)
Eucgr.C02148	EgMDH1	2200	2220	+	2.89e-07	ATATCGCCGGCACTCCCGGCG	PF03195 - Protein of unknown function DUF260 (DUF260)
Eucgr.C02148	EgMDH1	2204	2224	-	1.26e-06	GCGACGCCGGGAGTGCCGGCG	PF03195 - Protein of unknown function DUF260 (DUF260)
Eucgr.C02148	EgMDH1	2209	2229	+	1.24e-06	GCACTCCCGGCGTCGCCGCCG	PF03195 - Protein of unknown function DUF260 (DUF260)
Eucgr.C02148	EgMDH1	2212	2232	+	2.49e-06	CTCCCGGCGTCGCCGCCGACG	PF03195 - Protein of unknown function DUF260 (DUF260)
Eucgr.C02148	EgMDH1	2218	2238	+	2.28e-06	GCGTCGCCGCCGACGTCGGCC	PF03195 - Protein of unknown function DUF260 (DUF260)
Eucgr.C02592	EgMDH2	2025	2034	+	3.69e-06	CCCACGTGCG	PTHR16223:SF28 - TRANSCRIPTION FACTOR BHLH66-RELATED
Eucgr.C02592	EgMDH2	2025	2034	-	3.69e-06	CGCACGTGGG	PTHR16223:SF28 - TRANSCRIPTION FACTOR BHLH66-RELATED
Eucgr.C02802	EgMDH11	2904	2918	+	3.88e-06	GGCGGTGACGTGTTC	PTHR13301:SF29 - TRANSCRIPTION FACTOR HY5
Eucgr.C02893	EgMDH8	431	445	+	1.07e-06	taagatgaccgttgg	PTHR10641:SF599 - MYB TRANSCRIPTION FACTOR-RELATED
Eucgr.C03658	EgMDH2	1488	1502	-	2.08e-06	AATATTATCCAAATT	PTHR12374//PTHR12374:SF19 - TRANSCRIPTIONAL ADAPTOR 2 ADA2 -RELATED
Eucgr.C04155	EgMDH1	714	724	-	5.78e-07	AGAATATTCCG	PTHR31003//PTHR31003:SF3 - MYB FAMILY TRANSCRIPTION FACTOR
Eucgr.C04155	EgMDH1	715	725	+	9.81e-06	ggaatattctt	PTHR31003//PTHR31003:SF3 - MYB FAMILY TRANSCRIPTION FACTOR
Eucgr.D00264	EgMDH11	1102	1110	-	4.99e-06	TTTGTCGGC	PF02362//PF06507 - B3 DNA binding domain (B3) // Auxin response factor (Auxin_resp)
Eucgr.D00428	EgMDH2	2024	2034	-	5.73e-06	CGCACGTGGGT	PTHR31506:SF8 - BES1/BZR1 HOMOLOG PROTEIN 3
Eucgr.D00490	EgMDH4	1952	1972	-	2.58e-06	AGGAGGAGAAAAAAGTGAACT	PF02701 - Dof domain, zinc finger (zf-Dof)
Eucgr.D00490	EgMDH4	450	470	+	6.61e-08	agaaaaaaaaaaaagaaaaaa	PF02701 - Dof domain, zinc finger (zf-Dof)
Eucgr.D00490	EgMDH4	457	477	+	1.02e-06	aaaaaaagaaaaaagataaag	PF02701 - Dof domain, zinc finger (zf-Dof)
Eucgr.D00490	EgMDH2	751	771	-	6.96e-06	TAAAAAGGAAAAAAGAAAATT	PF02701 - Dof domain, zinc finger (zf-Dof)
Eucgr.D00490	EgMDH2	93	113	+	5.58e-06	tcatgattgaaaaaggaaaaa	PF02701 - Dof domain, zinc finger (zf-Dof)
Eucgr.D00490	EgMDH6	1493	1513	-	3.28e-06	AGAAATGCGAAAAAGGGAAGG	PF02701 - Dof domain, zinc finger (zf-Dof)
Eucgr.D00490	EgMDH10	1724	1744	-	1.58e-07	AAAAAAAAAAAAAAGGATCAA	PF02701 - Dof domain, zinc finger (zf-Dof)
Eucgr.D00490	EgMDH11	1063	1083	+	1.84e-06	ataaaaaaaaaaaagaagaaa	PF02701 - Dof domain, zinc finger (zf-Dof)
Eucgr.D00490	EgMDH7	1576	1596	+	6.32e-06	ccagaaagaaaaaagaaaaag	PF02701 - Dof domain, zinc finger (zf-Dof)
Eucgr.D00490	EgMDH7	1582	1602	+	3.37e-07	agaaaaaagaaaaagaggaaa	PF02701 - Dof domain, zinc finger (zf-Dof)
Eucgr.D00490	EgMDH7	1591	1611	+	1.62e-06	aaaaagaggaaaaagaagaaa	PF02701 - Dof domain, zinc finger (zf-Dof)
Eucgr.D00490	EgMDH7	1600	1620	+	3.54e-08	aaaaagaagaaaaaggaaaac	PF02701 - Dof domain, zinc finger (zf-Dof)
Eucgr.D00490	EgMDH14	1589	1609	+	6.32e-06	ccagaaagaaaaaagaaaaag	PF02701 - Dof domain, zinc finger (zf-Dof)
Eucgr.D00490	EgMDH14	1595	1615	+	3.37e-07	agaaaaaagaaaaagaggaaa	PF02701 - Dof domain, zinc finger (zf-Dof)
Eucgr.D00490	EgMDH14	1604	1624	+	1.62e-06	aaaaagaggaaaaagaagaaa	PF02701 - Dof domain, zinc finger (zf-Dof)
Eucgr.D00490	EgMDH14	1613	1633	+	3.54e-08	aaaaagaagaaaaaggaaaac	PF02701 - Dof domain, zinc finger (zf-Dof)
Eucgr.D00490	EgMDH12	1595	1615	+	3.37e-07	agaaaaaagaaaaagaggaaa	PF02701 - Dof domain, zinc finger (zf-Dof)
Eucgr.D00588	EgMDH10	2620	2629	+	7.49e-06	TTGTCGGAGA	PTHR31384:SF5 - AUXIN RESPONSE FACTOR 3
Eucgr.D00588	EgMDH8	1577	1586	+	2e-06	ttgtcggaaa	PTHR31384:SF5 - AUXIN RESPONSE FACTOR 3
Eucgr.D00877	EgMDH8	2554	2567	-	3.86e-06	CATGAGGCACGTGA	PTHR31945:SF20 - TRANSCRIPTION FACTOR DYSFUNCTIONAL TAPETUM 1
Eucgr.D00972	EgMDH4	1673	1685	+	6.31e-07	aagcgaatattcc	PTHR31314:SF5 - MYB-LIKE HTH TRANSCRIPTIONAL REGULATOR FAMILY PROTEIN-RELATED
Eucgr.D01054	EgMDH4	1077	1097	+	4.06e-06	ttctttttgtctatctatatc	PTHR31421:SF2 - PROTEIN BASIC PENTACYSTEINE6
Eucgr.D01054	EgMDH4	1079	1099	+	9.64e-06	ctttttgtctatctatatctt	PTHR31421:SF2 - PROTEIN BASIC PENTACYSTEINE6
Eucgr.D01054	EgMDH4	1682	1702	+	9.89e-06	ttccaaggctctctctcttta	PTHR31421:SF2 - PROTEIN BASIC PENTACYSTEINE6
Eucgr.D01054	EgMDH4	1690	1710	+	6.82e-06	ctctctctctttacttttttc	PTHR31421:SF2 - PROTEIN BASIC PENTACYSTEINE6
Eucgr.D01054	EgMDH2	1431	1451	-	2.61e-06	ATTTCTCTCTCTCTCTCATGG	PTHR31421:SF2 - PROTEIN BASIC PENTACYSTEINE6
Eucgr.D01054	EgMDH2	1433	1453	-	8.65e-08	TCATTTCTCTCTCTCTCTCAT	PTHR31421:SF2 - PROTEIN BASIC PENTACYSTEINE6
Eucgr.D01054	EgMDH2	1435	1455	-	3.95e-08	ATTCATTTCTCTCTCTCTCTC	PTHR31421:SF2 - PROTEIN BASIC PENTACYSTEINE6
Eucgr.D01054	EgMDH2	1439	1459	-	9.57e-07	CTCGATTCATTTCTCTCTCTC	PTHR31421:SF2 - PROTEIN BASIC PENTACYSTEINE6
Eucgr.D01054	EgMDH2	533	553	-	6.96e-06	TTTATTCTCTCTCTCTTCTTT	PTHR31421:SF2 - PROTEIN BASIC PENTACYSTEINE6
Eucgr.D01054	EgMDH8	1388	1408	-	6.61e-06	TTCAAACTCTCTCTTCCTCAA	PTHR31421:SF2 - PROTEIN BASIC PENTACYSTEINE6
Eucgr.D01054	EgMDH3	1195	1215	-	5.72e-06	CACTCTCGCTCTCTTCATTTT	PTHR31421:SF2 - PROTEIN BASIC PENTACYSTEINE6
Eucgr.D01054	EgMDH3	1226	1246	-	1.16e-06	CCATCTTCCTTTCTCTGTATC	PTHR31421:SF2 - PROTEIN BASIC PENTACYSTEINE6
Eucgr.D01054	EgMDH3	1946	1966	+	9.24e-07	aactctccctctcactcactc	PTHR31421:SF2 - PROTEIN BASIC PENTACYSTEINE6
Eucgr.D01054	EgMDH3	1948	1968	+	1.56e-08	ctctccctctcactcactctc	PTHR31421:SF2 - PROTEIN BASIC PENTACYSTEINE6
Eucgr.D01054	EgMDH3	1950	1970	+	3.33e-06	ctccctctcactcactctcta	PTHR31421:SF2 - PROTEIN BASIC PENTACYSTEINE6
Eucgr.D01054	EgMDH3	1952	1972	+	1.35e-06	ccctctcactcactctctaga	PTHR31421:SF2 - PROTEIN BASIC PENTACYSTEINE6
Eucgr.D01054	EgMDH1	192	212	-	8.57e-07	CTCTCTCTCTTTCTCACATAT	PTHR31421:SF2 - PROTEIN BASIC PENTACYSTEINE6
Eucgr.D01054	EgMDH1	194	214	-	7.71e-07	CTCTCTCTCTCTTTCTCACAT	PTHR31421:SF2 - PROTEIN BASIC PENTACYSTEINE6
Eucgr.D01054	EgMDH1	1948	1968	+	9.85e-06	aaccccgtcgctctctctctc	PTHR31421:SF2 - PROTEIN BASIC PENTACYSTEINE6
Eucgr.D01054	EgMDH1	1950	1970	+	1.5e-08	ccccgtcgctctctctctctc	PTHR31421:SF2 - PROTEIN BASIC PENTACYSTEINE6
Eucgr.D01054	EgMDH1	1952	1972	+	3.92e-10	ccgtcgctctctctctctctc	PTHR31421:SF2 - PROTEIN BASIC PENTACYSTEINE6
Eucgr.D01054	EgMDH1	1954	1974	+	2.7e-10	gtcgctctctctctctctctc	PTHR31421:SF2 - PROTEIN BASIC PENTACYSTEINE6
Eucgr.D01054	EgMDH1	1956	1976	+	7.91e-10	cgctctctctctctctctctc	PTHR31421:SF2 - PROTEIN BASIC PENTACYSTEINE6
Eucgr.D01054	EgMDH1	1958	1978	+	3.52e-13	ctctctctctctctctctcta	PTHR31421:SF2 - PROTEIN BASIC PENTACYSTEINE6
Eucgr.D01054	EgMDH1	196	216	-	3.41e-10	CTCTCTCTCTCTCTTTCTCAC	PTHR31421:SF2 - PROTEIN BASIC PENTACYSTEINE6
Eucgr.D01054	EgMDH1	1960	1980	+	4.23e-10	ctctctctctctctctctacc	PTHR31421:SF2 - PROTEIN BASIC PENTACYSTEINE6
Eucgr.D01054	EgMDH1	1962	1982	+	7.86e-11	ctctctctctctctctacctc	PTHR31421:SF2 - PROTEIN BASIC PENTACYSTEINE6
Eucgr.D01054	EgMDH1	1964	1984	+	1.36e-09	ctctctctctctctacctctt	PTHR31421:SF2 - PROTEIN BASIC PENTACYSTEINE6
Eucgr.D01054	EgMDH1	1966	1986	+	2.66e-07	ctctctctctctacctcttcc	PTHR31421:SF2 - PROTEIN BASIC PENTACYSTEINE6
Eucgr.D01054	EgMDH1	198	218	-	1.44e-11	CTCTCTCTCTCTCTCTTTCTC	PTHR31421:SF2 - PROTEIN BASIC PENTACYSTEINE6
Eucgr.D01054	EgMDH1	200	220	-	3.4e-12	CTCTCTCTCTCTCTCTCTTTC	PTHR31421:SF2 - PROTEIN BASIC PENTACYSTEINE6
Eucgr.D01054	EgMDH1	202	222	-	1.77e-12	CTCTCTCTCTCTCTCTCTCTT	PTHR31421:SF2 - PROTEIN BASIC PENTACYSTEINE6
Eucgr.D01054	EgMDH1	204	224	-	1.48e-13	CTCTCTCTCTCTCTCTCTCTC	PTHR31421:SF2 - PROTEIN BASIC PENTACYSTEINE6
Eucgr.D01054	EgMDH1	206	226	-	1.48e-13	CTCTCTCTCTCTCTCTCTCTC	PTHR31421:SF2 - PROTEIN BASIC PENTACYSTEINE6
Eucgr.D01054	EgMDH1	208	228	-	1.48e-13	CTCTCTCTCTCTCTCTCTCTC	PTHR31421:SF2 - PROTEIN BASIC PENTACYSTEINE6
Eucgr.D01054	EgMDH1	210	230	-	1.48e-13	CTCTCTCTCTCTCTCTCTCTC	PTHR31421:SF2 - PROTEIN BASIC PENTACYSTEINE6
Eucgr.D01054	EgMDH1	212	232	-	1.48e-13	CTCTCTCTCTCTCTCTCTCTC	PTHR31421:SF2 - PROTEIN BASIC PENTACYSTEINE6
Eucgr.D01054	EgMDH1	214	234	-	1.48e-13	CTCTCTCTCTCTCTCTCTCTC	PTHR31421:SF2 - PROTEIN BASIC PENTACYSTEINE6
Eucgr.D01054	EgMDH1	216	236	-	1.48e-13	CTCTCTCTCTCTCTCTCTCTC	PTHR31421:SF2 - PROTEIN BASIC PENTACYSTEINE6
Eucgr.D01054	EgMDH1	218	238	-	1.07e-12	ATCTCTCTCTCTCTCTCTCTC	PTHR31421:SF2 - PROTEIN BASIC PENTACYSTEINE6
Eucgr.D01054	EgMDH1	220	240	-	1.97e-10	AAATCTCTCTCTCTCTCTCTC	PTHR31421:SF2 - PROTEIN BASIC PENTACYSTEINE6
Eucgr.D01054	EgMDH1	222	242	-	1.26e-08	AAAAATCTCTCTCTCTCTCTC	PTHR31421:SF2 - PROTEIN BASIC PENTACYSTEINE6
Eucgr.D01054	EgMDH7	1907	1927	+	5.7e-06	ccttacccttctctttctctc	PTHR31421:SF2 - PROTEIN BASIC PENTACYSTEINE6
Eucgr.D01054	EgMDH7	1909	1929	+	6.44e-06	ttacccttctctttctctctc	PTHR31421:SF2 - PROTEIN BASIC PENTACYSTEINE6
Eucgr.D01054	EgMDH7	1911	1931	+	5.75e-09	acccttctctttctctctctc	PTHR31421:SF2 - PROTEIN BASIC PENTACYSTEINE6
Eucgr.D01054	EgMDH7	1913	1933	+	1.3e-09	ccttctctttctctctctctc	PTHR31421:SF2 - PROTEIN BASIC PENTACYSTEINE6
Eucgr.D01054	EgMDH7	1915	1935	+	1e-11	ttctctttctctctctctctc	PTHR31421:SF2 - PROTEIN BASIC PENTACYSTEINE6
Eucgr.D01054	EgMDH7	1917	1937	+	8.67e-13	ctctttctctctctctctctc	PTHR31421:SF2 - PROTEIN BASIC PENTACYSTEINE6
Eucgr.D01054	EgMDH7	1919	1939	+	9.56e-10	ctttctctctctctctctctg	PTHR31421:SF2 - PROTEIN BASIC PENTACYSTEINE6
Eucgr.D01054	EgMDH7	1921	1941	+	1.39e-06	ttctctctctctctctctggg	PTHR31421:SF2 - PROTEIN BASIC PENTACYSTEINE6
Eucgr.D01054	EgMDH7	1923	1943	+	5.08e-06	ctctctctctctctctgggta	PTHR31421:SF2 - PROTEIN BASIC PENTACYSTEINE6
Eucgr.D01054	EgMDH7	840	860	-	8.78e-06	CCTTCTCTTTCTCTCCGTTCC	PTHR31421:SF2 - PROTEIN BASIC PENTACYSTEINE6
Eucgr.D01054	EgMDH7	842	862	-	3.8e-06	CTCCTTCTCTTTCTCTCCGTT	PTHR31421:SF2 - PROTEIN BASIC PENTACYSTEINE6
Eucgr.D01054	EgMDH7	846	866	-	4.73e-06	GAAGCTCCTTCTCTTTCTCTC	PTHR31421:SF2 - PROTEIN BASIC PENTACYSTEINE6
Eucgr.D01054	EgMDH14	1909	1929	+	5.7e-06	ccttacccttctctttctctc	PTHR31421:SF2 - PROTEIN BASIC PENTACYSTEINE6
Eucgr.D01054	EgMDH14	1911	1931	+	6.44e-06	ttacccttctctttctctctc	PTHR31421:SF2 - PROTEIN BASIC PENTACYSTEINE6
Eucgr.D01054	EgMDH14	1913	1933	+	5.75e-09	acccttctctttctctctctc	PTHR31421:SF2 - PROTEIN BASIC PENTACYSTEINE6
Eucgr.D01054	EgMDH14	1915	1935	+	1.3e-09	ccttctctttctctctctctc	PTHR31421:SF2 - PROTEIN BASIC PENTACYSTEINE6
Eucgr.D01054	EgMDH14	1917	1937	+	1e-11	ttctctttctctctctctctc	PTHR31421:SF2 - PROTEIN BASIC PENTACYSTEINE6
Eucgr.D01054	EgMDH14	1919	1939	+	1.6e-10	ctctttctctctctctctctg	PTHR31421:SF2 - PROTEIN BASIC PENTACYSTEINE6
Eucgr.D01054	EgMDH14	1921	1941	+	4.08e-06	ctttctctctctctctctggg	PTHR31421:SF2 - PROTEIN BASIC PENTACYSTEINE6
Eucgr.D01054	EgMDH14	855	875	-	8.78e-06	CCTTCTCTTTCTCTCCGTTCC	PTHR31421:SF2 - PROTEIN BASIC PENTACYSTEINE6
Eucgr.D01054	EgMDH14	857	877	-	3.8e-06	CTCCTTCTCTTTCTCTCCGTT	PTHR31421:SF2 - PROTEIN BASIC PENTACYSTEINE6
Eucgr.D01054	EgMDH14	861	881	-	4.73e-06	GAAGCTCCTTCTCTTTCTCTC	PTHR31421:SF2 - PROTEIN BASIC PENTACYSTEINE6
Eucgr.D01054	EgMDH12	1911	1931	+	5.7e-06	ccttacccttctctttctctc	PTHR31421:SF2 - PROTEIN BASIC PENTACYSTEINE6
Eucgr.D01054	EgMDH12	1913	1933	+	6.44e-06	ttacccttctctttctctctc	PTHR31421:SF2 - PROTEIN BASIC PENTACYSTEINE6
Eucgr.D01054	EgMDH12	1915	1935	+	5.75e-09	acccttctctttctctctctc	PTHR31421:SF2 - PROTEIN BASIC PENTACYSTEINE6
Eucgr.D01054	EgMDH12	1917	1937	+	1.3e-09	ccttctctttctctctctctc	PTHR31421:SF2 - PROTEIN BASIC PENTACYSTEINE6
Eucgr.D01054	EgMDH12	1919	1939	+	9.95e-10	ttctctttctctctctctctg	PTHR31421:SF2 - PROTEIN BASIC PENTACYSTEINE6
Eucgr.D01054	EgMDH12	1921	1941	+	1.4e-06	ctctttctctctctctctgag	PTHR31421:SF2 - PROTEIN BASIC PENTACYSTEINE6
Eucgr.D01054	EgMDH12	1923	1943	+	2.29e-06	ctttctctctctctctgagta	PTHR31421:SF2 - PROTEIN BASIC PENTACYSTEINE6
Eucgr.D01054	EgMDH12	934	954	-	6.67e-08	CTCTCTCTCTCTCTCACCTTG	PTHR31421:SF2 - PROTEIN BASIC PENTACYSTEINE6
Eucgr.D01054	EgMDH12	936	956	-	2.06e-09	CTCTCTCTCTCTCTCTCACCT	PTHR31421:SF2 - PROTEIN BASIC PENTACYSTEINE6
Eucgr.D01054	EgMDH12	938	958	-	1.02e-11	CTCTCTCTCTCTCTCTCTCAC	PTHR31421:SF2 - PROTEIN BASIC PENTACYSTEINE6
Eucgr.D01054	EgMDH12	940	960	-	1.48e-13	CTCTCTCTCTCTCTCTCTCTC	PTHR31421:SF2 - PROTEIN BASIC PENTACYSTEINE6
Eucgr.D01054	EgMDH12	942	962	-	1.48e-13	CTCTCTCTCTCTCTCTCTCTC	PTHR31421:SF2 - PROTEIN BASIC PENTACYSTEINE6
Eucgr.D01054	EgMDH12	944	964	-	1.48e-13	CTCTCTCTCTCTCTCTCTCTC	PTHR31421:SF2 - PROTEIN BASIC PENTACYSTEINE6
Eucgr.D01054	EgMDH12	946	966	-	4.01e-09	AGCTCTCTCTCTCTCTCTCTC	PTHR31421:SF2 - PROTEIN BASIC PENTACYSTEINE6
Eucgr.D01054	EgMDH12	948	968	-	7.58e-11	CTAGCTCTCTCTCTCTCTCTC	PTHR31421:SF2 - PROTEIN BASIC PENTACYSTEINE6
Eucgr.D01054	EgMDH12	950	970	-	3.94e-10	CCCTAGCTCTCTCTCTCTCTC	PTHR31421:SF2 - PROTEIN BASIC PENTACYSTEINE6
Eucgr.D01054	EgMDH12	952	972	-	2.25e-07	CTCCCTAGCTCTCTCTCTCTC	PTHR31421:SF2 - PROTEIN BASIC PENTACYSTEINE6
Eucgr.D01054	EgMDH12	954	974	-	4.14e-06	TCCTCCCTAGCTCTCTCTCTC	PTHR31421:SF2 - PROTEIN BASIC PENTACYSTEINE6
Eucgr.D01219	EgMDH10	2590	2599	-	5.2e-06	GCGTTGACCT	PF03106 - WRKY DNA -binding domain (WRKY)
Eucgr.D01775	EgMDH2	356	363	-	3.81e-06	CCGCCGCC	PTHR31194//PTHR31194:SF16 - SHN SHINE , DNA BINDING / TRANSCRIPTION FACTOR
Eucgr.D01775	EgMDH11	2085	2092	+	7.62e-06	GCGCCGCC	PTHR31194//PTHR31194:SF16 - SHN SHINE , DNA BINDING / TRANSCRIPTION FACTOR
Eucgr.D01775	EgMDH11	2254	2261	+	3.81e-06	CCGCCGCC	PTHR31194//PTHR31194:SF16 - SHN SHINE , DNA BINDING / TRANSCRIPTION FACTOR
Eucgr.D01775	EgMDH3	1988	1995	-	3.81e-06	CCGCCGCC	PTHR31194//PTHR31194:SF16 - SHN SHINE , DNA BINDING / TRANSCRIPTION FACTOR
Eucgr.D01775	EgMDH3	2033	2040	-	3.81e-06	CCGCCGCC	PTHR31194//PTHR31194:SF16 - SHN SHINE , DNA BINDING / TRANSCRIPTION FACTOR
Eucgr.D01775	EgMDH1	2044	2051	+	3.81e-06	CCGCCGCC	PTHR31194//PTHR31194:SF16 - SHN SHINE , DNA BINDING / TRANSCRIPTION FACTOR
Eucgr.D01775	EgMDH1	2122	2129	+	7.62e-06	GCGCCGCC	PTHR31194//PTHR31194:SF16 - SHN SHINE , DNA BINDING / TRANSCRIPTION FACTOR
Eucgr.D01775	EgMDH13	2331	2338	+	7.62e-06	GCGCCGCC	PTHR31194//PTHR31194:SF16 - SHN SHINE , DNA BINDING / TRANSCRIPTION FACTOR
Eucgr.D02102	EgMDH2	2002	2016	+	6.24e-06	TGGCGGTGGCAGAGC	PTHR31985:SF11 - ETHYLENE-RESPONSIVE TRANSCRIPTION FACTOR ERF035
Eucgr.D02102	EgMDH1	2218	2232	-	1.42e-06	CGTCGGCGGCGACGC	PTHR31985:SF11 - ETHYLENE-RESPONSIVE TRANSCRIPTION FACTOR ERF035
Eucgr.D02111	EgMDH4	2026	2040	+	4.66e-06	TCGTCACCGGCGCCG	PF00847 - AP2 domain (AP2)
Eucgr.D02111	EgMDH4	2029	2043	+	1.49e-06	TCACCGGCGCCGCAG	PF00847 - AP2 domain (AP2)
Eucgr.D02111	EgMDH9	1209	1223	-	7.76e-06	GCACCGCCGTCGCAA	PF00847 - AP2 domain (AP2)
Eucgr.D02111	EgMDH9	1212	1226	-	4.58e-06	CTCGCACCGCCGTCG	PF00847 - AP2 domain (AP2)
Eucgr.D02111	EgMDH2	2002	2016	-	8.24e-06	GCTCTGCCACCGCCA	PF00847 - AP2 domain (AP2)
Eucgr.D02111	EgMDH10	1960	1974	+	1.4e-06	ccgctgccaccgcct	PF00847 - AP2 domain (AP2)
Eucgr.D02111	EgMDH10	1973	1987	+	1.92e-06	ctgcctccgccgtcc	PF00847 - AP2 domain (AP2)
Eucgr.D02111	EgMDH10	2332	2346	+	4.38e-06	TCGTCACCGCCGGCG	PF00847 - AP2 domain (AP2)
Eucgr.D02111	EgMDH10	2335	2349	+	2.78e-06	TCACCGCCGGCGCCC	PF00847 - AP2 domain (AP2)
Eucgr.D02111	EgMDH11	2082	2096	+	2.75e-07	ACGGCGCCGCCGTCG	PF00847 - AP2 domain (AP2)
Eucgr.D02111	EgMDH11	2251	2265	+	8.89e-06	ACGCCGCCGCCTTCC	PF00847 - AP2 domain (AP2)
Eucgr.D02111	EgMDH11	2299	2313	+	6.59e-07	ACGCCGTCGCCGCCG	PF00847 - AP2 domain (AP2)
Eucgr.D02111	EgMDH11	2302	2316	+	6.17e-06	CCGTCGCCGCCGGGT	PF00847 - AP2 domain (AP2)
Eucgr.D02111	EgMDH11	2329	2343	+	4.38e-06	TCGTCACCGCCGGCG	PF00847 - AP2 domain (AP2)
Eucgr.D02111	EgMDH8	2689	2703	+	3.95e-06	ACGCCACCGTCGCCA	PF00847 - AP2 domain (AP2)
Eucgr.D02111	EgMDH8	2692	2706	+	9.88e-07	CCACCGTCGCCACCA	PF00847 - AP2 domain (AP2)
Eucgr.D02111	EgMDH3	1984	1998	-	6.89e-09	CCACCGCCGCCGCTG	PF00847 - AP2 domain (AP2)
Eucgr.D02111	EgMDH3	1987	2001	-	2.46e-07	TTGCCACCGCCGCCG	PF00847 - AP2 domain (AP2)
Eucgr.D02111	EgMDH3	1990	2004	-	8.59e-06	TCATTGCCACCGCCG	PF00847 - AP2 domain (AP2)
Eucgr.D02111	EgMDH3	2032	2046	-	2.5e-07	ACCTCGCCGCCGCCG	PF00847 - AP2 domain (AP2)
Eucgr.D02111	EgMDH3	2066	2080	+	7.26e-07	CCTTCTCCGCCGCGG	PF00847 - AP2 domain (AP2)
Eucgr.D02111	EgMDH3	2218	2232	+	4.83e-06	CCGGCGTCGCCGCGG	PF00847 - AP2 domain (AP2)
Eucgr.D02111	EgMDH1	2038	2052	+	3.67e-06	CGTCCTCCGCCGCCC	PF00847 - AP2 domain (AP2)
Eucgr.D02111	EgMDH1	2060	2074	+	4.92e-06	GCACCTCCTCCGCCG	PF00847 - AP2 domain (AP2)
Eucgr.D02111	EgMDH1	2119	2133	+	9.3e-07	TCGGCGCCGCCGGCG	PF00847 - AP2 domain (AP2)
Eucgr.D02111	EgMDH1	2120	2134	-	7.4e-07	CCGCCGGCGGCGCCG	PF00847 - AP2 domain (AP2)
Eucgr.D02111	EgMDH1	2215	2229	+	3.66e-07	CCGGCGTCGCCGCCG	PF00847 - AP2 domain (AP2)
Eucgr.D02111	EgMDH1	2218	2232	+	9.9e-06	GCGTCGCCGCCGACG	PF00847 - AP2 domain (AP2)
Eucgr.D02111	EgMDH1	2221	2235	+	4.83e-06	TCGCCGCCGACGTCG	PF00847 - AP2 domain (AP2)
Eucgr.D02111	EgMDH5	1696	1710	-	1e-05	CCTCCACCGTCTCCA	PF00847 - AP2 domain (AP2)
Eucgr.D02271	EgMDH5	1269	1283	-	2.72e-06	TTGAAGGTAGGTGTG	PTHR10641//PTHR10641:SF622 - MYB-LIKE DNA-BINDING PROTEIN MYB
Eucgr.D02271	EgMDH5	227	241	+	2.68e-06	tcgttggttggtgga	PTHR10641//PTHR10641:SF622 - MYB-LIKE DNA-BINDING PROTEIN MYB
Eucgr.D02499	EgMDH2	2026	2033	+	7.24e-06	CCACGTGC	PTHR12565:SF173 - TRANSCRIPTION FACTOR UNE10
Eucgr.D02499	EgMDH5	741	748	-	7.24e-06	CCACGTGC	PTHR12565:SF173 - TRANSCRIPTION FACTOR UNE10
Eucgr.D02611	EgMDH4	1673	1686	+	4.22e-06	aagcgaatattcca	PTHR31499:SF5 - HOMEODOMAIN-LIKE SUPERFAMILY PROTEIN
Eucgr.D02611	EgMDH9	1554	1567	+	8.53e-06	agacgaatcttctt	PTHR31499:SF5 - HOMEODOMAIN-LIKE SUPERFAMILY PROTEIN
Eucgr.E00298	EgMDH10	2487	2501	+	6.94e-06	TACGTGGCGTGGAAG	PTHR31989:SF51 - F5D14.30 PROTEIN-RELATED
Eucgr.E00298	EgMDH11	2484	2498	+	6.94e-06	TACGTGGCGTGGAAG	PTHR31989:SF51 - F5D14.30 PROTEIN-RELATED
Eucgr.E01006	EgMDH4	1699	1712	-	8.49e-06	CCGAAAAAAGTAAA	PTHR11945:SF97 - FLORAL HOMEOTIC PROTEIN PISTILLATA
Eucgr.E01006	EgMDH4	455	468	+	7.13e-06	aaaaaaaaagaaaa	PTHR11945:SF97 - FLORAL HOMEOTIC PROTEIN PISTILLATA
Eucgr.E01006	EgMDH6	131	144	+	4.76e-06	acaaaagcggaaag	PTHR11945:SF97 - FLORAL HOMEOTIC PROTEIN PISTILLATA
Eucgr.E01006	EgMDH11	1071	1084	+	6.07e-06	aaaaaagaagaaaa	PTHR11945:SF97 - FLORAL HOMEOTIC PROTEIN PISTILLATA
Eucgr.E01006	EgMDH1	135	148	-	1.51e-06	CCAAAAAAGGATAA	PTHR11945:SF97 - FLORAL HOMEOTIC PROTEIN PISTILLATA
Eucgr.E01006	EgMDH7	1590	1603	+	7.74e-06	gaaaaagaggaaaa	PTHR11945:SF97 - FLORAL HOMEOTIC PROTEIN PISTILLATA
Eucgr.E01006	EgMDH7	24	37	-	2.59e-06	GCAAAAGTAGAAAA	PTHR11945:SF97 - FLORAL HOMEOTIC PROTEIN PISTILLATA
Eucgr.E01006	EgMDH14	1603	1616	+	7.74e-06	gaaaaagaggaaaa	PTHR11945:SF97 - FLORAL HOMEOTIC PROTEIN PISTILLATA
Eucgr.E01006	EgMDH14	36	49	-	2.59e-06	GCAAAAGTAGAAAA	PTHR11945:SF97 - FLORAL HOMEOTIC PROTEIN PISTILLATA
Eucgr.E01006	EgMDH12	1603	1616	+	7.74e-06	gaaaaagaggaaaa	PTHR11945:SF97 - FLORAL HOMEOTIC PROTEIN PISTILLATA
Eucgr.E01022	EgMDH3	690	704	+	6.77e-06	acttggcttttgaag	PTHR32002:SF4 - PROTEIN NLP6-RELATED
Eucgr.E01330	EgMDH3	1797	1815	-	8.09e-07	TATCTCGAAATGGAAAAAA	PTHR11945:SF146 - AGAMOUS-LIKE MADS-BOX PROTEIN AGL13-RELATED
Eucgr.E01330	EgMDH1	1230	1248	+	9.29e-06	tttcttaatgtggaaaagt	PTHR11945:SF146 - AGAMOUS-LIKE MADS-BOX PROTEIN AGL13-RELATED
Eucgr.E01414	EgMDH3	2203	2221	+	1.94e-06	ATATCGCCGGCACTCCCGG	PTHR31529:SF3 - LOB DOMAIN-CONTAINING PROTEIN 18-RELATED
Eucgr.E01414	EgMDH1	2200	2218	+	1.94e-06	ATATCGCCGGCACTCCCGG	PTHR31529:SF3 - LOB DOMAIN-CONTAINING PROTEIN 18-RELATED
Eucgr.E01474	EgMDH4	1554	1563	+	5.23e-06	taatcataat	PTHR31675:SF0 - AXIAL REGULATOR YABBY 1-RELATED
Eucgr.E01474	EgMDH9	223	232	+	5.23e-06	taatcataat	PTHR31675:SF0 - AXIAL REGULATOR YABBY 1-RELATED
Eucgr.E01593	EgMDH11	2663	2677	+	6.73e-06	CAGCGTCGGCGGGGT	PTHR31985:SF11 - ETHYLENE-RESPONSIVE TRANSCRIPTION FACTOR ERF035
Eucgr.E02652	EgMDH9	1211	1227	+	3.15e-06	gcgacggcggtgcgaga	PF00847 - AP2 domain (AP2)
Eucgr.E02652	EgMDH2	2001	2017	+	5.73e-06	ATGGCGGTGGCAGAGCT	PF00847 - AP2 domain (AP2)
Eucgr.E02652	EgMDH10	1956	1972	-	9.33e-06	GCGGTGGCAGCGGTGGT	PF00847 - AP2 domain (AP2)
Eucgr.E02652	EgMDH10	1959	1975	-	3.66e-06	CAGGCGGTGGCAGCGGT	PF00847 - AP2 domain (AP2)
Eucgr.E02652	EgMDH10	1969	1985	-	7.2e-06	ACGGCGGAGGCAGGCGG	PF00847 - AP2 domain (AP2)
Eucgr.E02652	EgMDH10	2947	2963	+	2.06e-06	GTGGCGGCGTCGTGGGC	PF00847 - AP2 domain (AP2)
Eucgr.E02652	EgMDH11	2078	2094	-	6.9e-07	ACGGCGGCGCCGTCTCC	PF00847 - AP2 domain (AP2)
Eucgr.E02652	EgMDH11	2079	2095	+	6.28e-06	GAGACGGCGCCGCCGTC	PF00847 - AP2 domain (AP2)
Eucgr.E02652	EgMDH11	2081	2097	-	6.98e-07	ACGACGGCGGCGCCGTC	PF00847 - AP2 domain (AP2)
Eucgr.E02652	EgMDH11	2247	2263	-	4.52e-06	AAGGCGGCGGCGTGCTG	PF00847 - AP2 domain (AP2)
Eucgr.E02652	EgMDH11	2298	2314	-	1.68e-07	CCGGCGGCGACGGCGTA	PF00847 - AP2 domain (AP2)
Eucgr.E02652	EgMDH8	2691	2707	-	4.81e-06	CTGGTGGCGACGGTGGC	PF00847 - AP2 domain (AP2)
Eucgr.E02652	EgMDH3	1986	2002	+	2.14e-08	gcggcggcggtggcaat	PF00847 - AP2 domain (AP2)
Eucgr.E02652	EgMDH3	1989	2005	+	4.99e-06	gcggcggtggcaatgAG	PF00847 - AP2 domain (AP2)
Eucgr.E02652	EgMDH3	2031	2047	+	2.82e-07	tcggcggcggcgaggTC	PF00847 - AP2 domain (AP2)
Eucgr.E02652	EgMDH3	2034	2050	+	1.05e-07	gcggcggcgaggTCGGC	PF00847 - AP2 domain (AP2)
Eucgr.E02652	EgMDH3	2062	2078	-	4.88e-06	GCGGCGGAGAAGGTGCG	PF00847 - AP2 domain (AP2)
Eucgr.E02652	EgMDH1	2059	2075	-	4.24e-06	CCGGCGGAGGAGGTGCG	PF00847 - AP2 domain (AP2)
Eucgr.E02652	EgMDH1	2115	2131	-	2.87e-06	CCGGCGGCGCCGAGCAC	PF00847 - AP2 domain (AP2)
Eucgr.E02652	EgMDH1	2214	2230	-	4.87e-07	TCGGCGGCGACGCCGGG	PF00847 - AP2 domain (AP2)
Eucgr.E02652	EgMDH1	778	794	+	8.21e-06	atggcggctgtatcgat	PF00847 - AP2 domain (AP2)
Eucgr.E02652	EgMDH13	2324	2340	-	9.53e-06	CTGGCGGCGCCTGATCT	PF00847 - AP2 domain (AP2)
Eucgr.E02813	EgMDH8	924	942	+	1.91e-06	tgatgtagcatctagaagc	PTHR10015:SF161 - E2F/DP FAMILY WINGED-HELIX DNA-BINDING DOMAIN-CONTAINING PROTEIN-RELATED
Eucgr.E02813	EgMDH8	931	949	-	6.48e-06	AAGATGAGCTTCTAGATGC	PTHR10015:SF161 - E2F/DP FAMILY WINGED-HELIX DNA-BINDING DOMAIN-CONTAINING PROTEIN-RELATED
Eucgr.E04232	EgMDH4	1673	1685	+	6.31e-07	aagcgaatattcc	PTHR31314:SF5 - MYB-LIKE HTH TRANSCRIPTIONAL REGULATOR FAMILY PROTEIN-RELATED
Eucgr.E04247	EgMDH11	2661	2674	+	9.1e-06	ATCAGCGTCGGCGG	PTHR11514:SF29 - BASIC HELIX-LOOP-HELIX (BHLH) DNA-BINDING SUPERFAMILY PROTEIN-RELATED
Eucgr.E04323	EgMDH5	221	241	+	9.58e-06	aatttgtcgttggttggtgga	PTHR10641//PTHR10641:SF487 - MYB-LIKE DNA-BINDING PROTEIN MYB
Eucgr.F00044	EgMDH4	159	179	+	3.11e-06	ttttggattttcatgggaaat	PTHR31391:SF17 - B3 DOMAIN-CONTAINING PROTEIN REM16
Eucgr.F00044	EgMDH9	1467	1487	+	8.13e-07	attcgctttttaacgggaaaa	PTHR31391:SF17 - B3 DOMAIN-CONTAINING PROTEIN REM16
Eucgr.F00044	EgMDH9	1629	1649	+	2.73e-06	atattttttttcttgggaaaa	PTHR31391:SF17 - B3 DOMAIN-CONTAINING PROTEIN REM16
Eucgr.F00044	EgMDH6	2041	2061	+	4.21e-06	CAATCTCTTTTGGCAGCAAAA	PTHR31391:SF17 - B3 DOMAIN-CONTAINING PROTEIN REM16
Eucgr.F00100	EgMDH8	2546	2566	+	5.15e-06	GAAGAACATCACGTGCCTCAT	PTHR12565:SF129 - TRANSCRIPTION FACTOR BHLH74
Eucgr.F00100	EgMDH5	103	123	+	8.96e-06	caagatgtgcacgtgaaagaa	PTHR12565:SF129 - TRANSCRIPTION FACTOR BHLH74
Eucgr.F00100	EgMDH5	736	756	-	6.46e-06	TGTCATTACCACGTGCTTTAA	PTHR12565:SF129 - TRANSCRIPTION FACTOR BHLH74
Eucgr.F00106	EgMDH2	1844	1863	+	4.09e-06	ttccctctccttcttccccc	PTHR11850:SF64 - HOMEOBOX PROTEIN KNOTTED-1-LIKE 1
Eucgr.F00106	EgMDH2	1847	1866	+	6.9e-06	cctctccttcttccccctcc	PTHR11850:SF64 - HOMEOBOX PROTEIN KNOTTED-1-LIKE 1
Eucgr.F00106	EgMDH6	446	465	+	1.03e-06	ttcgcgttctccgcccctgt	PTHR11850:SF64 - HOMEOBOX PROTEIN KNOTTED-1-LIKE 1
Eucgr.F00106	EgMDH10	2281	2300	+	4.69e-06	tcctctcctcctcctccgac	PTHR11850:SF64 - HOMEOBOX PROTEIN KNOTTED-1-LIKE 1
Eucgr.F00106	EgMDH1	1952	1971	+	4.66e-07	ccgtcgctctctctctctct	PTHR11850:SF64 - HOMEOBOX PROTEIN KNOTTED-1-LIKE 1
Eucgr.F00106	EgMDH1	1954	1973	+	4.22e-06	gtcgctctctctctctctct	PTHR11850:SF64 - HOMEOBOX PROTEIN KNOTTED-1-LIKE 1
Eucgr.F00106	EgMDH1	1956	1975	+	1.59e-07	cgctctctctctctctctct	PTHR11850:SF64 - HOMEOBOX PROTEIN KNOTTED-1-LIKE 1
Eucgr.F00106	EgMDH1	1958	1977	+	1.05e-07	ctctctctctctctctctct	PTHR11850:SF64 - HOMEOBOX PROTEIN KNOTTED-1-LIKE 1
Eucgr.F00106	EgMDH1	1960	1979	+	1.99e-07	ctctctctctctctctctac	PTHR11850:SF64 - HOMEOBOX PROTEIN KNOTTED-1-LIKE 1
Eucgr.F00106	EgMDH1	1964	1983	+	9.27e-07	ctctctctctctctacctct	PTHR11850:SF64 - HOMEOBOX PROTEIN KNOTTED-1-LIKE 1
Eucgr.F00106	EgMDH1	201	220	-	4.26e-07	CTCTCTCTCTCTCTCTCTTT	PTHR11850:SF64 - HOMEOBOX PROTEIN KNOTTED-1-LIKE 1
Eucgr.F00106	EgMDH1	203	222	-	1.05e-07	CTCTCTCTCTCTCTCTCTCT	PTHR11850:SF64 - HOMEOBOX PROTEIN KNOTTED-1-LIKE 1
Eucgr.F00106	EgMDH1	2034	2053	+	4.01e-06	CGGTCGTCCTCCGCCGCCCC	PTHR11850:SF64 - HOMEOBOX PROTEIN KNOTTED-1-LIKE 1
Eucgr.F00106	EgMDH1	205	224	-	1.05e-07	CTCTCTCTCTCTCTCTCTCT	PTHR11850:SF64 - HOMEOBOX PROTEIN KNOTTED-1-LIKE 1
Eucgr.F00106	EgMDH1	207	226	-	1.05e-07	CTCTCTCTCTCTCTCTCTCT	PTHR11850:SF64 - HOMEOBOX PROTEIN KNOTTED-1-LIKE 1
Eucgr.F00106	EgMDH1	209	228	-	1.05e-07	CTCTCTCTCTCTCTCTCTCT	PTHR11850:SF64 - HOMEOBOX PROTEIN KNOTTED-1-LIKE 1
Eucgr.F00106	EgMDH1	211	230	-	1.05e-07	CTCTCTCTCTCTCTCTCTCT	PTHR11850:SF64 - HOMEOBOX PROTEIN KNOTTED-1-LIKE 1
Eucgr.F00106	EgMDH1	213	232	-	1.05e-07	CTCTCTCTCTCTCTCTCTCT	PTHR11850:SF64 - HOMEOBOX PROTEIN KNOTTED-1-LIKE 1
Eucgr.F00106	EgMDH1	215	234	-	1.05e-07	CTCTCTCTCTCTCTCTCTCT	PTHR11850:SF64 - HOMEOBOX PROTEIN KNOTTED-1-LIKE 1
Eucgr.F00106	EgMDH1	217	236	-	1.05e-07	CTCTCTCTCTCTCTCTCTCT	PTHR11850:SF64 - HOMEOBOX PROTEIN KNOTTED-1-LIKE 1
Eucgr.F00106	EgMDH7	1913	1932	+	3.36e-06	ccttctctttctctctctct	PTHR11850:SF64 - HOMEOBOX PROTEIN KNOTTED-1-LIKE 1
Eucgr.F00106	EgMDH7	1915	1934	+	4.47e-06	ttctctttctctctctctct	PTHR11850:SF64 - HOMEOBOX PROTEIN KNOTTED-1-LIKE 1
Eucgr.F00106	EgMDH7	1917	1936	+	2.22e-06	ctctttctctctctctctct	PTHR11850:SF64 - HOMEOBOX PROTEIN KNOTTED-1-LIKE 1
Eucgr.F00106	EgMDH7	1919	1938	+	6.73e-07	ctttctctctctctctctct	PTHR11850:SF64 - HOMEOBOX PROTEIN KNOTTED-1-LIKE 1
Eucgr.F00106	EgMDH7	1921	1940	+	6.11e-07	ttctctctctctctctctgg	PTHR11850:SF64 - HOMEOBOX PROTEIN KNOTTED-1-LIKE 1
Eucgr.F00106	EgMDH7	1923	1942	+	1.48e-06	ctctctctctctctctgggt	PTHR11850:SF64 - HOMEOBOX PROTEIN KNOTTED-1-LIKE 1
Eucgr.F00106	EgMDH7	837	856	-	2.6e-07	CTCTTTCTCTCCGTTCCTCC	PTHR11850:SF64 - HOMEOBOX PROTEIN KNOTTED-1-LIKE 1
Eucgr.F00106	EgMDH7	841	860	-	4.88e-06	CCTTCTCTTTCTCTCCGTTC	PTHR11850:SF64 - HOMEOBOX PROTEIN KNOTTED-1-LIKE 1
Eucgr.F00106	EgMDH14	1915	1934	+	3.36e-06	ccttctctttctctctctct	PTHR11850:SF64 - HOMEOBOX PROTEIN KNOTTED-1-LIKE 1
Eucgr.F00106	EgMDH14	1917	1936	+	4.47e-06	ttctctttctctctctctct	PTHR11850:SF64 - HOMEOBOX PROTEIN KNOTTED-1-LIKE 1
Eucgr.F00106	EgMDH14	1919	1938	+	2.22e-06	ctctttctctctctctctct	PTHR11850:SF64 - HOMEOBOX PROTEIN KNOTTED-1-LIKE 1
Eucgr.F00106	EgMDH14	1921	1940	+	7.86e-07	ctttctctctctctctctgg	PTHR11850:SF64 - HOMEOBOX PROTEIN KNOTTED-1-LIKE 1
Eucgr.F00106	EgMDH14	1923	1942	+	8.34e-07	ttctctctctctctctgggc	PTHR11850:SF64 - HOMEOBOX PROTEIN KNOTTED-1-LIKE 1
Eucgr.F00106	EgMDH14	852	871	-	2.6e-07	CTCTTTCTCTCCGTTCCTCC	PTHR11850:SF64 - HOMEOBOX PROTEIN KNOTTED-1-LIKE 1
Eucgr.F00106	EgMDH14	856	875	-	4.88e-06	CCTTCTCTTTCTCTCCGTTC	PTHR11850:SF64 - HOMEOBOX PROTEIN KNOTTED-1-LIKE 1
Eucgr.F00106	EgMDH12	1917	1936	+	3.36e-06	ccttctctttctctctctct	PTHR11850:SF64 - HOMEOBOX PROTEIN KNOTTED-1-LIKE 1
Eucgr.F00106	EgMDH12	1919	1938	+	4.47e-06	ttctctttctctctctctct	PTHR11850:SF64 - HOMEOBOX PROTEIN KNOTTED-1-LIKE 1
Eucgr.F00106	EgMDH12	941	960	-	1.05e-07	CTCTCTCTCTCTCTCTCTCT	PTHR11850:SF64 - HOMEOBOX PROTEIN KNOTTED-1-LIKE 1
Eucgr.F00106	EgMDH12	943	962	-	1.05e-07	CTCTCTCTCTCTCTCTCTCT	PTHR11850:SF64 - HOMEOBOX PROTEIN KNOTTED-1-LIKE 1
Eucgr.F00106	EgMDH12	945	964	-	1.05e-07	CTCTCTCTCTCTCTCTCTCT	PTHR11850:SF64 - HOMEOBOX PROTEIN KNOTTED-1-LIKE 1
Eucgr.F00106	EgMDH12	953	972	-	5.07e-06	CTCCCTAGCTCTCTCTCTCT	PTHR11850:SF64 - HOMEOBOX PROTEIN KNOTTED-1-LIKE 1
Eucgr.F00192	EgMDH2	2001	2013	+	1.43e-06	ATGGCGGTGGCAG	PTHR31729:SF0 - ETHYLENE-RESPONSIVE TRANSCRIPTION FACTOR ERF008-RELATED
Eucgr.F00192	EgMDH2	997	1009	+	2.72e-06	atggcggtgatgg	PTHR31729:SF0 - ETHYLENE-RESPONSIVE TRANSCRIPTION FACTOR ERF008-RELATED
Eucgr.F00192	EgMDH10	1919	1931	-	5.79e-06	ATGGCGGTGGTTA	PTHR31729:SF0 - ETHYLENE-RESPONSIVE TRANSCRIPTION FACTOR ERF008-RELATED
Eucgr.F00192	EgMDH3	1986	1998	+	2.12e-06	gcggcggcggtgg	PTHR31729:SF0 - ETHYLENE-RESPONSIVE TRANSCRIPTION FACTOR ERF008-RELATED
Eucgr.F00192	EgMDH3	1989	2001	+	8.71e-06	gcggcggtggcaa	PTHR31729:SF0 - ETHYLENE-RESPONSIVE TRANSCRIPTION FACTOR ERF008-RELATED
Eucgr.F00192	EgMDH3	2031	2043	+	8.71e-06	tcggcggcggcga	PTHR31729:SF0 - ETHYLENE-RESPONSIVE TRANSCRIPTION FACTOR ERF008-RELATED
Eucgr.F00192	EgMDH1	2041	2053	-	3.95e-06	GGGGCGGCGGAGG	PTHR31729:SF0 - ETHYLENE-RESPONSIVE TRANSCRIPTION FACTOR ERF008-RELATED
Eucgr.F00192	EgMDH1	2088	2100	+	5.79e-06	GAGTCGGTGCCGG	PTHR31729:SF0 - ETHYLENE-RESPONSIVE TRANSCRIPTION FACTOR ERF008-RELATED
Eucgr.F00192	EgMDH1	2221	2233	-	3.76e-06	ACGTCGGCGGCGA	PTHR31729:SF0 - ETHYLENE-RESPONSIVE TRANSCRIPTION FACTOR ERF008-RELATED
Eucgr.F00497	EgMDH4	2259	2268	-	1.37e-06	CACCGACCAT	PTHR31657:SF9 - ETHYLENE-RESPONSIVE TRANSCRIPTION FACTOR CRF5-RELATED
Eucgr.F01091	EgMDH6	2177	2193	+	4.27e-06	CTTCTTGGGCAAGGAAA	PTHR31719:SF9 - ATNAC2-RELATED
Eucgr.F01164	EgMDH9	1209	1223	-	2.13e-06	GCACCGCCGTCGCAA	PF00847 - AP2 domain (AP2)
Eucgr.F01164	EgMDH11	2077	2091	-	6.77e-06	GCGGCGCCGTCTCCT	PF00847 - AP2 domain (AP2)
Eucgr.F01164	EgMDH11	2082	2096	+	1.1e-06	ACGGCGCCGCCGTCG	PF00847 - AP2 domain (AP2)
Eucgr.F01164	EgMDH11	2085	2099	+	1.48e-06	GCGCCGCCGTCGTCC	PF00847 - AP2 domain (AP2)
Eucgr.F01164	EgMDH11	2251	2265	+	1.39e-06	ACGCCGCCGCCTTCC	PF00847 - AP2 domain (AP2)
Eucgr.F01164	EgMDH3	1981	1995	-	2.6e-06	CCGCCGCCGCTGCCG	PF00847 - AP2 domain (AP2)
Eucgr.F01164	EgMDH3	1984	1998	-	5.47e-08	CCACCGCCGCCGCTG	PF00847 - AP2 domain (AP2)
Eucgr.F01164	EgMDH3	2029	2043	-	3.37e-07	TCGCCGCCGCCGATC	PF00847 - AP2 domain (AP2)
Eucgr.F01164	EgMDH1	2119	2133	+	3.21e-06	TCGGCGCCGCCGGCG	PF00847 - AP2 domain (AP2)
Eucgr.F01164	EgMDH1	2218	2232	+	7.17e-06	GCGTCGCCGCCGACG	PF00847 - AP2 domain (AP2)
Eucgr.F01164	EgMDH1	2221	2235	+	7.68e-06	TCGCCGCCGACGTCG	PF00847 - AP2 domain (AP2)
Eucgr.F01164	EgMDH13	2328	2342	+	5.42e-06	CAGGCGCCGCCAGAA	PF00847 - AP2 domain (AP2)
Eucgr.F01541	EgMDH2	2016	2035	-	7.63e-06	GCGCACGTGGGTGCGGTCAG	PTHR31506:SF6 - PROTEIN BRASSINAZOLE-RESISTANT 1-RELATED
Eucgr.F01607	EgMDH2	2002	2016	-	4.76e-07	GCTCTGCCACCGCCA	PF00847 - AP2 domain (AP2)
Eucgr.F01607	EgMDH10	1916	1930	+	7.45e-06	cactaaccaccgcca	PF00847 - AP2 domain (AP2)
Eucgr.F01607	EgMDH10	1960	1974	+	2.67e-08	ccgctgccaccgcct	PF00847 - AP2 domain (AP2)
Eucgr.F01607	EgMDH10	1973	1987	+	5.31e-06	ctgcctccgccgtcc	PF00847 - AP2 domain (AP2)
Eucgr.F01607	EgMDH11	2082	2096	+	6.32e-06	ACGGCGCCGCCGTCG	PF00847 - AP2 domain (AP2)
Eucgr.F01607	EgMDH11	2299	2313	+	4.64e-06	ACGCCGTCGCCGCCG	PF00847 - AP2 domain (AP2)
Eucgr.F01607	EgMDH11	2326	2340	+	7.99e-06	GCATCGTCACCGCCG	PF00847 - AP2 domain (AP2)
Eucgr.F01607	EgMDH8	2692	2706	+	9.4e-06	CCACCGTCGCCACCA	PF00847 - AP2 domain (AP2)
Eucgr.F01607	EgMDH3	1984	1998	-	4.82e-08	CCACCGCCGCCGCTG	PF00847 - AP2 domain (AP2)
Eucgr.F01607	EgMDH3	1987	2001	-	1.38e-06	TTGCCACCGCCGCCG	PF00847 - AP2 domain (AP2)
Eucgr.F01607	EgMDH3	1990	2004	-	1.37e-06	TCATTGCCACCGCCG	PF00847 - AP2 domain (AP2)
Eucgr.F01607	EgMDH3	2032	2046	-	1.73e-06	ACCTCGCCGCCGCCG	PF00847 - AP2 domain (AP2)
Eucgr.F01607	EgMDH1	2038	2052	+	3.44e-06	CGTCCTCCGCCGCCC	PF00847 - AP2 domain (AP2)
Eucgr.F01607	EgMDH1	2215	2229	+	3.84e-06	CCGGCGTCGCCGCCG	PF00847 - AP2 domain (AP2)
Eucgr.F01607	EgMDH1	2218	2232	+	4.69e-06	GCGTCGCCGCCGACG	PF00847 - AP2 domain (AP2)
Eucgr.F01607	EgMDH14	1670	1684	-	4.69e-06	GATCCTCCACCGTCT	PF00847 - AP2 domain (AP2)
Eucgr.F01607	EgMDH5	1699	1713	-	4.69e-06	GATCCTCCACCGTCT	PF00847 - AP2 domain (AP2)
Eucgr.F01615	EgMDH4	1496	1510	+	6e-06	ctccaaaagtggtta	PTHR11945:SF219 - FLORAL HOMEOTIC PROTEIN APETALA 3
Eucgr.F01615	EgMDH2	1220	1234	-	8.22e-06	GCCCAAAATTGGAAA	PTHR11945:SF219 - FLORAL HOMEOTIC PROTEIN APETALA 3
Eucgr.F01615	EgMDH1	136	150	-	2.11e-06	CTCCAAAAAAGGATA	PTHR11945:SF219 - FLORAL HOMEOTIC PROTEIN APETALA 3
Eucgr.F02090	EgMDH9	1190	1199	-	2.89e-06	CCCGACAAGA	PTHR31384:SF10 - AUXIN RESPONSE FACTOR 5
Eucgr.F02090	EgMDH6	351	360	-	4.05e-06	ACCGACAAAA	PTHR31384:SF10 - AUXIN RESPONSE FACTOR 5
Eucgr.F02157	EgMDH9	847	861	-	6.42e-07	TCATGGCCGTTCGTT	PTHR10071:SF192 - GATA TRANSCRIPTION FACTOR 25
Eucgr.F02157	EgMDH6	11	25	-	3.24e-08	TCTGAGCCGTTGGTT	PTHR10071:SF192 - GATA TRANSCRIPTION FACTOR 25
Eucgr.F02207	EgMDH4	2257	2269	+	7.94e-06	TCATGGTCGGTGG	PTHR10641:SF654 - TRANSCRIPTION FACTOR RAX1-RELATED
Eucgr.F02207	EgMDH2	1621	1633	-	2.62e-06	CGATGGTTGGTGC	PTHR10641:SF654 - TRANSCRIPTION FACTOR RAX1-RELATED
Eucgr.F02207	EgMDH5	1270	1282	-	5.34e-06	TGAAGGTAGGTGT	PTHR10641:SF654 - TRANSCRIPTION FACTOR RAX1-RELATED
Eucgr.F02223	EgMDH9	1280	1300	-	8.3e-06	ACGCACACACCCCGAATAGAA	PTHR32467:SF11 - AP2-LIKE ETHYLENE-RESPONSIVE TRANSCRIPTION FACTOR ANT
Eucgr.F02223	EgMDH9	3008	3028	-	7.16e-06	TCATACACATCCCCATCTCCA	PTHR32467:SF11 - AP2-LIKE ETHYLENE-RESPONSIVE TRANSCRIPTION FACTOR ANT
Eucgr.F02223	EgMDH3	2082	2102	-	1.75e-07	CGGCACGGATTCCGAGCTGAA	PTHR32467:SF11 - AP2-LIKE ETHYLENE-RESPONSIVE TRANSCRIPTION FACTOR ANT
Eucgr.F02262	EgMDH2	2173	2183	-	4.54e-06	CACTGCCACTG	PTHR26374:SF208 - ZINC FINGER PROTEIN AZF3-RELATED
Eucgr.F02715	EgMDH2	2765	2776	+	8.72e-07	ATGCCAGCTGGC	PTHR13690:SF86 - TRANSCRIPTION FACTOR VIP1
Eucgr.F02715	EgMDH2	2767	2778	-	1.2e-06	GTGCCAGCTGGC	PTHR13690:SF86 - TRANSCRIPTION FACTOR VIP1
Eucgr.F02715	EgMDH7	2528	2539	-	5.77e-06	GTGCCAGCTCTC	PTHR13690:SF86 - TRANSCRIPTION FACTOR VIP1
Eucgr.F02715	EgMDH13	2486	2497	-	3.03e-06	ACGCCAGCTGTA	PTHR13690:SF86 - TRANSCRIPTION FACTOR VIP1
Eucgr.F02715	EgMDH12	2528	2539	-	5.77e-06	GTGCCAGCTCTC	PTHR13690:SF86 - TRANSCRIPTION FACTOR VIP1
Eucgr.F02974	EgMDH4	2024	2043	+	3.5e-06	CCTCGTCACCGGCGCCGCAG	PTHR31985:SF17 - ETHYLENE-RESPONSIVE TRANSCRIPTION FACTOR ERF021
Eucgr.F02974	EgMDH10	1952	1971	+	2.26e-06	acgcaccaccgctgccaccg	PTHR31985:SF17 - ETHYLENE-RESPONSIVE TRANSCRIPTION FACTOR ERF021
Eucgr.F02974	EgMDH10	1955	1974	+	1.34e-09	caccaccgctgccaccgcct	PTHR31985:SF17 - ETHYLENE-RESPONSIVE TRANSCRIPTION FACTOR ERF021
Eucgr.F02974	EgMDH10	1958	1977	+	6.66e-06	caccgctgccaccgcctgcc	PTHR31985:SF17 - ETHYLENE-RESPONSIVE TRANSCRIPTION FACTOR ERF021
Eucgr.F02974	EgMDH10	2108	2127	+	8.83e-06	CCACGCCAAGATCACCGTCG	PTHR31985:SF17 - ETHYLENE-RESPONSIVE TRANSCRIPTION FACTOR ERF021
Eucgr.F02974	EgMDH10	2120	2139	+	3.96e-06	CACCGTCGTCGGAGCCGGCA	PTHR31985:SF17 - ETHYLENE-RESPONSIVE TRANSCRIPTION FACTOR ERF021
Eucgr.F02974	EgMDH10	2273	2292	+	4.66e-06	CACCAccatcctctcctcct	PTHR31985:SF17 - ETHYLENE-RESPONSIVE TRANSCRIPTION FACTOR ERF021
Eucgr.F02974	EgMDH10	2276	2295	+	7.56e-06	CAccatcctctcctcctcct	PTHR31985:SF17 - ETHYLENE-RESPONSIVE TRANSCRIPTION FACTOR ERF021
Eucgr.F02974	EgMDH10	2282	2301	+	7.32e-07	cctctcctcctcctccgact	PTHR31985:SF17 - ETHYLENE-RESPONSIVE TRANSCRIPTION FACTOR ERF021
Eucgr.F02974	EgMDH10	2291	2310	+	1.77e-06	ctcctccgactaTGCCGTCA	PTHR31985:SF17 - ETHYLENE-RESPONSIVE TRANSCRIPTION FACTOR ERF021
Eucgr.F02974	EgMDH10	2324	2343	+	1.29e-06	CCTCATTGTCGTCACCGCCG	PTHR31985:SF17 - ETHYLENE-RESPONSIVE TRANSCRIPTION FACTOR ERF021
Eucgr.F02974	EgMDH10	2327	2346	+	1.83e-06	CATTGTCGTCACCGCCGGCG	PTHR31985:SF17 - ETHYLENE-RESPONSIVE TRANSCRIPTION FACTOR ERF021
Eucgr.F02974	EgMDH10	2942	2961	-	3.29e-06	CCACGACGCCGCCACGGCCG	PTHR31985:SF17 - ETHYLENE-RESPONSIVE TRANSCRIPTION FACTOR ERF021
Eucgr.F02974	EgMDH10	2948	2967	-	7.71e-06	TCACGCCCACGACGCCGCCA	PTHR31985:SF17 - ETHYLENE-RESPONSIVE TRANSCRIPTION FACTOR ERF021
Eucgr.F02974	EgMDH10	2980	2999	-	8.83e-06	CTGCATCTCCTCATCCGTCA	PTHR31985:SF17 - ETHYLENE-RESPONSIVE TRANSCRIPTION FACTOR ERF021
Eucgr.F02974	EgMDH11	2288	2307	+	2.94e-07	CTCCGTCGACTACGCCGTCG	PTHR31985:SF17 - ETHYLENE-RESPONSIVE TRANSCRIPTION FACTOR ERF021
Eucgr.F02974	EgMDH11	2291	2310	+	3.58e-06	CGTCGACTACGCCGTCGCCG	PTHR31985:SF17 - ETHYLENE-RESPONSIVE TRANSCRIPTION FACTOR ERF021
Eucgr.F02974	EgMDH11	2294	2313	+	6.27e-08	CGACTACGCCGTCGCCGCCG	PTHR31985:SF17 - ETHYLENE-RESPONSIVE TRANSCRIPTION FACTOR ERF021
Eucgr.F02974	EgMDH11	2321	2340	+	2.31e-06	CCTCTGCATCGTCACCGCCG	PTHR31985:SF17 - ETHYLENE-RESPONSIVE TRANSCRIPTION FACTOR ERF021
Eucgr.F02974	EgMDH11	2324	2343	+	7e-07	CTGCATCGTCACCGCCGGCG	PTHR31985:SF17 - ETHYLENE-RESPONSIVE TRANSCRIPTION FACTOR ERF021
Eucgr.F02974	EgMDH11	2977	2996	-	5.15e-06	TGCCGCCTCCTCCTCGGTCA	PTHR31985:SF17 - ETHYLENE-RESPONSIVE TRANSCRIPTION FACTOR ERF021
Eucgr.F02974	EgMDH8	2687	2706	+	5.01e-07	TCACGCCACCGTCGCCACCA	PTHR31985:SF17 - ETHYLENE-RESPONSIVE TRANSCRIPTION FACTOR ERF021
Eucgr.F02974	EgMDH8	2690	2709	+	8.27e-08	CGCCACCGTCGCCACCAGCA	PTHR31985:SF17 - ETHYLENE-RESPONSIVE TRANSCRIPTION FACTOR ERF021
Eucgr.F02974	EgMDH3	1978	1997	-	8.49e-08	CACCGCCGCCGCTGCCGCTT	PTHR31985:SF17 - ETHYLENE-RESPONSIVE TRANSCRIPTION FACTOR ERF021
Eucgr.F02974	EgMDH3	1981	2000	-	4.6e-08	TGCCACCGCCGCCGCTGCCG	PTHR31985:SF17 - ETHYLENE-RESPONSIVE TRANSCRIPTION FACTOR ERF021
Eucgr.F02974	EgMDH3	1984	2003	-	3.05e-07	CATTGCCACCGCCGCCGCTG	PTHR31985:SF17 - ETHYLENE-RESPONSIVE TRANSCRIPTION FACTOR ERF021
Eucgr.F02974	EgMDH3	1987	2006	-	1.17e-07	CCTCATTGCCACCGCCGCCG	PTHR31985:SF17 - ETHYLENE-RESPONSIVE TRANSCRIPTION FACTOR ERF021
Eucgr.F02974	EgMDH3	2032	2051	-	1.22e-07	AGCCGACCTCGCCGCCGCCG	PTHR31985:SF17 - ETHYLENE-RESPONSIVE TRANSCRIPTION FACTOR ERF021
Eucgr.F02974	EgMDH1	2213	2232	+	5.07e-07	TCCCGGCGTCGCCGCCGACG	PTHR31985:SF17 - ETHYLENE-RESPONSIVE TRANSCRIPTION FACTOR ERF021
Eucgr.F02974	EgMDH1	2216	2235	+	3.12e-07	CGGCGTCGCCGCCGACGTCG	PTHR31985:SF17 - ETHYLENE-RESPONSIVE TRANSCRIPTION FACTOR ERF021
Eucgr.F03656	EgMDH6	1203	1217	-	6.17e-08	AAAAGTTAGGTAAAA	PTHR10641:SF653 - ATMYB103
Eucgr.F03947	EgMDH2	1996	2014	+	1.45e-06	ctgcaATGGCGGTGGCAGA	PTHR31194:SF4 - ETHYLENE-RESPONSIVE TRANSCRIPTION FACTOR ERF003
Eucgr.F03947	EgMDH10	1953	1971	-	5.26e-07	CGGTGGCAGCGGTGGTGCG	PTHR31194:SF4 - ETHYLENE-RESPONSIVE TRANSCRIPTION FACTOR ERF003
Eucgr.F03947	EgMDH10	1975	1993	-	2.35e-06	GTGGTGGGACGGCGGAGGC	PTHR31194:SF4 - ETHYLENE-RESPONSIVE TRANSCRIPTION FACTOR ERF003
Eucgr.F03947	EgMDH10	2289	2307	-	1.49e-06	CGGCATAGTCGGAGGAGGA	PTHR31194:SF4 - ETHYLENE-RESPONSIVE TRANSCRIPTION FACTOR ERF003
Eucgr.F03947	EgMDH10	2331	2349	-	9.05e-06	GGGCGCCGGCGGTGACGAC	PTHR31194:SF4 - ETHYLENE-RESPONSIVE TRANSCRIPTION FACTOR ERF003
Eucgr.F03947	EgMDH10	2942	2960	+	8.52e-06	CGGCCGTGGCGGCGTCGTG	PTHR31194:SF4 - ETHYLENE-RESPONSIVE TRANSCRIPTION FACTOR ERF003
Eucgr.F03947	EgMDH11	2081	2099	-	5.12e-06	GGACGACGGCGGCGCCGTC	PTHR31194:SF4 - ETHYLENE-RESPONSIVE TRANSCRIPTION FACTOR ERF003
Eucgr.F03947	EgMDH11	2084	2102	-	3.9e-06	GGTGGACGACGGCGGCGCC	PTHR31194:SF4 - ETHYLENE-RESPONSIVE TRANSCRIPTION FACTOR ERF003
Eucgr.F03947	EgMDH11	2250	2268	-	2.19e-06	GGAGGAAGGCGGCGGCGTG	PTHR31194:SF4 - ETHYLENE-RESPONSIVE TRANSCRIPTION FACTOR ERF003
Eucgr.F03947	EgMDH11	2295	2313	-	2.84e-06	CGGCGGCGACGGCGTAGTC	PTHR31194:SF4 - ETHYLENE-RESPONSIVE TRANSCRIPTION FACTOR ERF003
Eucgr.F03947	EgMDH11	2301	2319	-	6.57e-06	CGGACCCGGCGGCGACGGC	PTHR31194:SF4 - ETHYLENE-RESPONSIVE TRANSCRIPTION FACTOR ERF003
Eucgr.F03947	EgMDH8	2688	2706	-	7.23e-07	TGGTGGCGACGGTGGCGTG	PTHR31194:SF4 - ETHYLENE-RESPONSIVE TRANSCRIPTION FACTOR ERF003
Eucgr.F03947	EgMDH3	1978	1996	+	1.8e-08	aagcggcagcggcggcggt	PTHR31194:SF4 - ETHYLENE-RESPONSIVE TRANSCRIPTION FACTOR ERF003
Eucgr.F03947	EgMDH3	1981	1999	+	1.32e-09	cggcagcggcggcggtggc	PTHR31194:SF4 - ETHYLENE-RESPONSIVE TRANSCRIPTION FACTOR ERF003
Eucgr.F03947	EgMDH3	1984	2002	+	5.14e-07	cagcggcggcggtggcaat	PTHR31194:SF4 - ETHYLENE-RESPONSIVE TRANSCRIPTION FACTOR ERF003
Eucgr.F03947	EgMDH3	2026	2044	+	9.7e-06	TCcgatcggcggcggcgag	PTHR31194:SF4 - ETHYLENE-RESPONSIVE TRANSCRIPTION FACTOR ERF003
Eucgr.F03947	EgMDH3	2068	2086	-	6.94e-06	CTGAATCCGCGGCGGAGAA	PTHR31194:SF4 - ETHYLENE-RESPONSIVE TRANSCRIPTION FACTOR ERF003
Eucgr.F03947	EgMDH1	2040	2058	-	8.01e-06	GCCGCGGGGCGGCGGAGGA	PTHR31194:SF4 - ETHYLENE-RESPONSIVE TRANSCRIPTION FACTOR ERF003
Eucgr.F03947	EgMDH1	2217	2235	-	3.45e-06	CGACGTCGGCGGCGACGCC	PTHR31194:SF4 - ETHYLENE-RESPONSIVE TRANSCRIPTION FACTOR ERF003
Eucgr.F03947	EgMDH1	2220	2238	-	1.59e-06	GGCCGACGTCGGCGGCGAC	PTHR31194:SF4 - ETHYLENE-RESPONSIVE TRANSCRIPTION FACTOR ERF003
Eucgr.F03947	EgMDH14	1664	1682	+	2.05e-07	aaggggagacggtggagga	PTHR31194:SF4 - ETHYLENE-RESPONSIVE TRANSCRIPTION FACTOR ERF003
Eucgr.F03947	EgMDH13	2327	2345	-	9.53e-06	AGGTTCTGGCGGCGCCTGA	PTHR31194:SF4 - ETHYLENE-RESPONSIVE TRANSCRIPTION FACTOR ERF003
Eucgr.F03947	EgMDH5	1693	1711	+	9.94e-08	aagtggagacggtggagga	PTHR31194:SF4 - ETHYLENE-RESPONSIVE TRANSCRIPTION FACTOR ERF003
Eucgr.F04055	EgMDH2	1326	1334	+	7.58e-06	aagaaaaca	PTHR31314:SF8 - MYB-LIKE HTH TRANSCRIPTIONAL REGULATOR FAMILY PROTEIN
Eucgr.F04055	EgMDH7	1428	1436	-	7.58e-06	AAGAAAACA	PTHR31314:SF8 - MYB-LIKE HTH TRANSCRIPTIONAL REGULATOR FAMILY PROTEIN
Eucgr.F04055	EgMDH14	1441	1449	-	7.58e-06	AAGAAAACA	PTHR31314:SF8 - MYB-LIKE HTH TRANSCRIPTIONAL REGULATOR FAMILY PROTEIN
Eucgr.F04055	EgMDH12	1443	1451	-	7.58e-06	AAGAAAACA	PTHR31314:SF8 - MYB-LIKE HTH TRANSCRIPTIONAL REGULATOR FAMILY PROTEIN
Eucgr.G00054	EgMDH5	1844	1862	+	3.53e-07	cctcgccctcacgtcatct	) PF02365 - No apical meristem (NAM) protein (NAM)
Eucgr.G00393	EgMDH11	2083	2097	+	8.63e-07	CGGCGCCGCCGTCGT	PTHR31190:SF21 - ETHYLENE-RESPONSIVE TRANSCRIPTION FACTOR 13
Eucgr.G00393	EgMDH11	2252	2266	+	1.75e-06	CGCCGCCGCCTTCCT	PTHR31190:SF21 - ETHYLENE-RESPONSIVE TRANSCRIPTION FACTOR 13
Eucgr.G00393	EgMDH3	1983	1997	-	1.87e-07	CACCGCCGCCGCTGC	PTHR31190:SF21 - ETHYLENE-RESPONSIVE TRANSCRIPTION FACTOR 13
Eucgr.G00393	EgMDH3	2028	2042	-	4.08e-06	CGCCGCCGCCGATCG	PTHR31190:SF21 - ETHYLENE-RESPONSIVE TRANSCRIPTION FACTOR 13
Eucgr.G00393	EgMDH3	2031	2045	-	9.99e-06	CCTCGCCGCCGCCGA	PTHR31190:SF21 - ETHYLENE-RESPONSIVE TRANSCRIPTION FACTOR 13
Eucgr.G00393	EgMDH1	2219	2233	+	5.57e-06	CGTCGCCGCCGACGT	PTHR31190:SF21 - ETHYLENE-RESPONSIVE TRANSCRIPTION FACTOR 13
Eucgr.G00393	EgMDH1	775	789	-	8.53e-06	TACAGCCGCCATCCG	PTHR31190:SF21 - ETHYLENE-RESPONSIVE TRANSCRIPTION FACTOR 13
Eucgr.G02066	EgMDH2	2257	2271	+	6.2e-07	AAGAAGAGACAAAAT	PTHR10593:SF43 - SHOOT GRAVITROPISM5-LIKE PROTEIN
Eucgr.G02066	EgMDH3	469	483	-	4.47e-06	AAAAACAGACAAAAG	PTHR10593:SF43 - SHOOT GRAVITROPISM5-LIKE PROTEIN
Eucgr.G02066	EgMDH13	1341	1355	-	3.37e-06	TGAAAAAGACAAATG	PTHR10593:SF43 - SHOOT GRAVITROPISM5-LIKE PROTEIN
Eucgr.G02066	EgMDH13	650	664	-	1.58e-06	AGAAAAAGACAAATG	PTHR10593:SF43 - SHOOT GRAVITROPISM5-LIKE PROTEIN
Eucgr.G02066	EgMDH13	932	946	-	1.58e-06	AGAAAAAGACAAATG	PTHR10593:SF43 - SHOOT GRAVITROPISM5-LIKE PROTEIN
Eucgr.G02067	EgMDH4	1074	1097	-	7.85e-06	GATATAGATAGACAAAAAGAAGTA	PTHR31421:SF0 - PROTEIN BASIC PENTACYSTEINE1-RELATED
Eucgr.G02067	EgMDH4	1086	1109	-	4.56e-06	GATAGAGATCAAGATATAGATAGA	PTHR31421:SF0 - PROTEIN BASIC PENTACYSTEINE1-RELATED
Eucgr.G02067	EgMDH4	449	472	+	9.59e-06	aagaaaaaaaaaaaagaaaaaaga	PTHR31421:SF0 - PROTEIN BASIC PENTACYSTEINE1-RELATED
Eucgr.G02067	EgMDH2	1431	1454	+	9.04e-06	ccatgagagagagagagaaatgaa	PTHR31421:SF0 - PROTEIN BASIC PENTACYSTEINE1-RELATED
Eucgr.G02067	EgMDH2	1433	1456	+	7.09e-07	atgagagagagagagaaatgaatc	PTHR31421:SF0 - PROTEIN BASIC PENTACYSTEINE1-RELATED
Eucgr.G02067	EgMDH2	1435	1458	+	1.45e-07	gagagagagagagaaatgaatcga	PTHR31421:SF0 - PROTEIN BASIC PENTACYSTEINE1-RELATED
Eucgr.G02067	EgMDH2	1437	1460	+	3.15e-07	gagagagagagaaatgaatcgagt	PTHR31421:SF0 - PROTEIN BASIC PENTACYSTEINE1-RELATED
Eucgr.G02067	EgMDH2	1839	1862	-	9.75e-06	GGGGAAGAAGGAGAGGGAAGGATG	PTHR31421:SF0 - PROTEIN BASIC PENTACYSTEINE1-RELATED
Eucgr.G02067	EgMDH2	523	546	+	1.2e-06	aggggaaaaaaaagaagagagaga	PTHR31421:SF0 - PROTEIN BASIC PENTACYSTEINE1-RELATED
Eucgr.G02067	EgMDH2	525	548	+	3.32e-07	gggaaaaaaaagaagagagagaga	PTHR31421:SF0 - PROTEIN BASIC PENTACYSTEINE1-RELATED
Eucgr.G02067	EgMDH2	527	550	+	5.67e-06	gaaaaaaaagaagagagagagaat	PTHR31421:SF0 - PROTEIN BASIC PENTACYSTEINE1-RELATED
Eucgr.G02067	EgMDH2	529	552	+	1.67e-06	aaaaaaagaagagagagagaataa	PTHR31421:SF0 - PROTEIN BASIC PENTACYSTEINE1-RELATED
Eucgr.G02067	EgMDH2	531	554	+	6.38e-06	aaaaagaagagagagagaataaag	PTHR31421:SF0 - PROTEIN BASIC PENTACYSTEINE1-RELATED
Eucgr.G02067	EgMDH6	1377	1400	-	1.47e-06	AAGGAAGAGAGAGATGTAAAACGA	PTHR31421:SF0 - PROTEIN BASIC PENTACYSTEINE1-RELATED
Eucgr.G02067	EgMDH11	1248	1271	+	3.34e-06	gattggaaaagaaaaatagagagt	PTHR31421:SF0 - PROTEIN BASIC PENTACYSTEINE1-RELATED
Eucgr.G02067	EgMDH11	1459	1482	+	9.85e-06	aacagaaagaaagaggagaggaaa	PTHR31421:SF0 - PROTEIN BASIC PENTACYSTEINE1-RELATED
Eucgr.G02067	EgMDH11	1461	1484	+	5.46e-06	cagaaagaaagaggagaggaaagc	PTHR31421:SF0 - PROTEIN BASIC PENTACYSTEINE1-RELATED
Eucgr.G02067	EgMDH8	1357	1380	+	2.8e-06	gacaagaagagagagagtttgaaa	PTHR31421:SF0 - PROTEIN BASIC PENTACYSTEINE1-RELATED
Eucgr.G02067	EgMDH8	99	122	+	6.07e-06	atgagagattaaaggatagagaaa	PTHR31421:SF0 - PROTEIN BASIC PENTACYSTEINE1-RELATED
Eucgr.G02067	EgMDH3	1197	1220	+	5.58e-06	aatgaagagagcgagagtgaagag	PTHR31421:SF0 - PROTEIN BASIC PENTACYSTEINE1-RELATED
Eucgr.G02067	EgMDH3	1224	1247	+	1.37e-06	gggatacagagaaaggaagatgga	PTHR31421:SF0 - PROTEIN BASIC PENTACYSTEINE1-RELATED
Eucgr.G02067	EgMDH3	1226	1249	+	4.75e-07	gatacagagaaaggaagatggaga	PTHR31421:SF0 - PROTEIN BASIC PENTACYSTEINE1-RELATED
Eucgr.G02067	EgMDH3	1228	1251	+	9.09e-06	tacagagaaaggaagatggagaaa	PTHR31421:SF0 - PROTEIN BASIC PENTACYSTEINE1-RELATED
Eucgr.G02067	EgMDH3	1230	1253	+	1.94e-06	cagagaaaggaagatggagaaagg	PTHR31421:SF0 - PROTEIN BASIC PENTACYSTEINE1-RELATED
Eucgr.G02067	EgMDH3	1232	1255	+	1.4e-07	gagaaaggaagatggagaaaggaa	PTHR31421:SF0 - PROTEIN BASIC PENTACYSTEINE1-RELATED
Eucgr.G02067	EgMDH3	1943	1966	-	1.99e-06	GAGTGAGTGAGAGGGAGAGTTGCG	PTHR31421:SF0 - PROTEIN BASIC PENTACYSTEINE1-RELATED
Eucgr.G02067	EgMDH3	1945	1968	-	1.07e-06	GAGAGTGAGTGAGAGGGAGAGTTG	PTHR31421:SF0 - PROTEIN BASIC PENTACYSTEINE1-RELATED
Eucgr.G02067	EgMDH3	1947	1970	-	4.16e-08	TAGAGAGTGAGTGAGAGGGAGAGT	PTHR31421:SF0 - PROTEIN BASIC PENTACYSTEINE1-RELATED
Eucgr.G02067	EgMDH3	1949	1972	-	2.37e-07	TCTAGAGAGTGAGTGAGAGGGAGA	PTHR31421:SF0 - PROTEIN BASIC PENTACYSTEINE1-RELATED
Eucgr.G02067	EgMDH1	192	215	+	5.74e-06	atatgtgagaaagagagagagaga	PTHR31421:SF0 - PROTEIN BASIC PENTACYSTEINE1-RELATED
Eucgr.G02067	EgMDH1	194	217	+	3e-10	atgtgagaaagagagagagagaga	PTHR31421:SF0 - PROTEIN BASIC PENTACYSTEINE1-RELATED
Eucgr.G02067	EgMDH1	1949	1972	-	7.6e-07	GAGAGAGAGAGAGAGCGACGGGGT	PTHR31421:SF0 - PROTEIN BASIC PENTACYSTEINE1-RELATED
Eucgr.G02067	EgMDH1	1951	1974	-	3.12e-08	GAGAGAGAGAGAGAGAGCGACGGG	PTHR31421:SF0 - PROTEIN BASIC PENTACYSTEINE1-RELATED
Eucgr.G02067	EgMDH1	1953	1976	-	2.68e-11	GAGAGAGAGAGAGAGAGAGCGACG	PTHR31421:SF0 - PROTEIN BASIC PENTACYSTEINE1-RELATED
Eucgr.G02067	EgMDH1	1955	1978	-	3.77e-12	TAGAGAGAGAGAGAGAGAGAGCGA	PTHR31421:SF0 - PROTEIN BASIC PENTACYSTEINE1-RELATED
Eucgr.G02067	EgMDH1	1957	1980	-	2.11e-11	GGTAGAGAGAGAGAGAGAGAGAGC	PTHR31421:SF0 - PROTEIN BASIC PENTACYSTEINE1-RELATED
Eucgr.G02067	EgMDH1	1959	1982	-	4.57e-12	GAGGTAGAGAGAGAGAGAGAGAGA	PTHR31421:SF0 - PROTEIN BASIC PENTACYSTEINE1-RELATED
Eucgr.G02067	EgMDH1	196	219	+	1.78e-12	gtgagaaagagagagagagagaga	PTHR31421:SF0 - PROTEIN BASIC PENTACYSTEINE1-RELATED
Eucgr.G02067	EgMDH1	1961	1984	-	1.35e-11	AAGAGGTAGAGAGAGAGAGAGAGA	PTHR31421:SF0 - PROTEIN BASIC PENTACYSTEINE1-RELATED
Eucgr.G02067	EgMDH1	1963	1986	-	1.08e-09	GGAAGAGGTAGAGAGAGAGAGAGA	PTHR31421:SF0 - PROTEIN BASIC PENTACYSTEINE1-RELATED
Eucgr.G02067	EgMDH1	1965	1988	-	8.78e-07	TGGGAAGAGGTAGAGAGAGAGAGA	PTHR31421:SF0 - PROTEIN BASIC PENTACYSTEINE1-RELATED
Eucgr.G02067	EgMDH1	1967	1990	-	4.78e-07	AATGGGAAGAGGTAGAGAGAGAGA	PTHR31421:SF0 - PROTEIN BASIC PENTACYSTEINE1-RELATED
Eucgr.G02067	EgMDH1	1969	1992	-	3.7e-06	AGAATGGGAAGAGGTAGAGAGAGA	PTHR31421:SF0 - PROTEIN BASIC PENTACYSTEINE1-RELATED
Eucgr.G02067	EgMDH1	198	221	+	2.65e-14	gagaaagagagagagagagagaga	PTHR31421:SF0 - PROTEIN BASIC PENTACYSTEINE1-RELATED
Eucgr.G02067	EgMDH1	200	223	+	3.23e-13	gaaagagagagagagagagagaga	PTHR31421:SF0 - PROTEIN BASIC PENTACYSTEINE1-RELATED
Eucgr.G02067	EgMDH1	202	225	+	1e-14	aagagagagagagagagagagaga	PTHR31421:SF0 - PROTEIN BASIC PENTACYSTEINE1-RELATED
Eucgr.G02067	EgMDH1	204	227	+	2.61e-15	gagagagagagagagagagagaga	PTHR31421:SF0 - PROTEIN BASIC PENTACYSTEINE1-RELATED
Eucgr.G02067	EgMDH1	206	229	+	2.61e-15	gagagagagagagagagagagaga	PTHR31421:SF0 - PROTEIN BASIC PENTACYSTEINE1-RELATED
Eucgr.G02067	EgMDH1	208	231	+	2.61e-15	gagagagagagagagagagagaga	PTHR31421:SF0 - PROTEIN BASIC PENTACYSTEINE1-RELATED
Eucgr.G02067	EgMDH1	210	233	+	2.61e-15	gagagagagagagagagagagaga	PTHR31421:SF0 - PROTEIN BASIC PENTACYSTEINE1-RELATED
Eucgr.G02067	EgMDH1	212	235	+	2.61e-15	gagagagagagagagagagagaga	PTHR31421:SF0 - PROTEIN BASIC PENTACYSTEINE1-RELATED
Eucgr.G02067	EgMDH1	214	237	+	2.61e-15	gagagagagagagagagagagaga	PTHR31421:SF0 - PROTEIN BASIC PENTACYSTEINE1-RELATED
Eucgr.G02067	EgMDH1	216	239	+	7.5e-13	gagagagagagagagagagagatt	PTHR31421:SF0 - PROTEIN BASIC PENTACYSTEINE1-RELATED
Eucgr.G02067	EgMDH1	218	241	+	6.77e-10	gagagagagagagagagagatttt	PTHR31421:SF0 - PROTEIN BASIC PENTACYSTEINE1-RELATED
Eucgr.G02067	EgMDH1	220	243	+	2.65e-07	gagagagagagagagagatttttc	PTHR31421:SF0 - PROTEIN BASIC PENTACYSTEINE1-RELATED
Eucgr.G02067	EgMDH1	222	245	+	3.45e-06	gagagagagagagagatttttcta	PTHR31421:SF0 - PROTEIN BASIC PENTACYSTEINE1-RELATED
Eucgr.G02067	EgMDH7	1586	1609	+	5.28e-06	aaaagaaaaagaggaaaaagaaga	PTHR31421:SF0 - PROTEIN BASIC PENTACYSTEINE1-RELATED
Eucgr.G02067	EgMDH7	1904	1927	-	1.51e-06	GAGAGAAAGAGAAGGGTAAGGGAG	PTHR31421:SF0 - PROTEIN BASIC PENTACYSTEINE1-RELATED
Eucgr.G02067	EgMDH7	1906	1929	-	6.02e-07	GAGAGAGAAAGAGAAGGGTAAGGG	PTHR31421:SF0 - PROTEIN BASIC PENTACYSTEINE1-RELATED
Eucgr.G02067	EgMDH7	1908	1931	-	4.15e-07	GAGAGAGAGAAAGAGAAGGGTAAG	PTHR31421:SF0 - PROTEIN BASIC PENTACYSTEINE1-RELATED
Eucgr.G02067	EgMDH7	1910	1933	-	4.3e-10	GAGAGAGAGAGAAAGAGAAGGGTA	PTHR31421:SF0 - PROTEIN BASIC PENTACYSTEINE1-RELATED
Eucgr.G02067	EgMDH7	1912	1935	-	3.5e-11	GAGAGAGAGAGAGAAAGAGAAGGG	PTHR31421:SF0 - PROTEIN BASIC PENTACYSTEINE1-RELATED
Eucgr.G02067	EgMDH7	1914	1937	-	8.17e-12	GAGAGAGAGAGAGAGAAAGAGAAG	PTHR31421:SF0 - PROTEIN BASIC PENTACYSTEINE1-RELATED
Eucgr.G02067	EgMDH7	1916	1939	-	1.11e-12	CAGAGAGAGAGAGAGAGAAAGAGA	PTHR31421:SF0 - PROTEIN BASIC PENTACYSTEINE1-RELATED
Eucgr.G02067	EgMDH7	1918	1941	-	1.77e-09	CCCAGAGAGAGAGAGAGAGAAAGA	PTHR31421:SF0 - PROTEIN BASIC PENTACYSTEINE1-RELATED
Eucgr.G02067	EgMDH7	1920	1943	-	1.44e-06	TACCCAGAGAGAGAGAGAGAGAAA	PTHR31421:SF0 - PROTEIN BASIC PENTACYSTEINE1-RELATED
Eucgr.G02067	EgMDH7	1922	1945	-	6.63e-06	TGTACCCAGAGAGAGAGAGAGAGA	PTHR31421:SF0 - PROTEIN BASIC PENTACYSTEINE1-RELATED
Eucgr.G02067	EgMDH7	832	855	+	4.05e-06	tatagggaggaacggagagaaaga	PTHR31421:SF0 - PROTEIN BASIC PENTACYSTEINE1-RELATED
Eucgr.G02067	EgMDH7	834	857	+	2.25e-06	tagggaggaacggagagaaagaga	PTHR31421:SF0 - PROTEIN BASIC PENTACYSTEINE1-RELATED
Eucgr.G02067	EgMDH7	838	861	+	3.76e-08	gaggaacggagagaaagagaagga	PTHR31421:SF0 - PROTEIN BASIC PENTACYSTEINE1-RELATED
Eucgr.G02067	EgMDH7	840	863	+	1.01e-06	ggaacggagagaaagagaaggagc	PTHR31421:SF0 - PROTEIN BASIC PENTACYSTEINE1-RELATED
Eucgr.G02067	EgMDH7	842	865	+	7.68e-06	aacggagagaaagagaaggagctt	PTHR31421:SF0 - PROTEIN BASIC PENTACYSTEINE1-RELATED
Eucgr.G02067	EgMDH14	1599	1622	+	5.28e-06	aaaagaaaaagaggaaaaagaaga	PTHR31421:SF0 - PROTEIN BASIC PENTACYSTEINE1-RELATED
Eucgr.G02067	EgMDH14	1906	1929	-	1.51e-06	GAGAGAAAGAGAAGGGTAAGGGAG	PTHR31421:SF0 - PROTEIN BASIC PENTACYSTEINE1-RELATED
Eucgr.G02067	EgMDH14	1908	1931	-	6.02e-07	GAGAGAGAAAGAGAAGGGTAAGGG	PTHR31421:SF0 - PROTEIN BASIC PENTACYSTEINE1-RELATED
Eucgr.G02067	EgMDH14	1910	1933	-	4.15e-07	GAGAGAGAGAAAGAGAAGGGTAAG	PTHR31421:SF0 - PROTEIN BASIC PENTACYSTEINE1-RELATED
Eucgr.G02067	EgMDH14	1912	1935	-	4.3e-10	GAGAGAGAGAGAAAGAGAAGGGTA	PTHR31421:SF0 - PROTEIN BASIC PENTACYSTEINE1-RELATED
Eucgr.G02067	EgMDH14	1914	1937	-	3.5e-11	GAGAGAGAGAGAGAAAGAGAAGGG	PTHR31421:SF0 - PROTEIN BASIC PENTACYSTEINE1-RELATED
Eucgr.G02067	EgMDH14	1916	1939	-	1.7e-10	CAGAGAGAGAGAGAGAAAGAGAAG	PTHR31421:SF0 - PROTEIN BASIC PENTACYSTEINE1-RELATED
Eucgr.G02067	EgMDH14	1918	1941	-	1.88e-09	CCCAGAGAGAGAGAGAGAAAGAGA	PTHR31421:SF0 - PROTEIN BASIC PENTACYSTEINE1-RELATED
Eucgr.G02067	EgMDH14	1920	1943	-	4.51e-06	TGCCCAGAGAGAGAGAGAGAAAGA	PTHR31421:SF0 - PROTEIN BASIC PENTACYSTEINE1-RELATED
Eucgr.G02067	EgMDH14	847	870	+	4.05e-06	tatagggaggaacggagagaaaga	PTHR31421:SF0 - PROTEIN BASIC PENTACYSTEINE1-RELATED
Eucgr.G02067	EgMDH14	849	872	+	2.25e-06	tagggaggaacggagagaaagaga	PTHR31421:SF0 - PROTEIN BASIC PENTACYSTEINE1-RELATED
Eucgr.G02067	EgMDH14	853	876	+	3.76e-08	gaggaacggagagaaagagaagga	PTHR31421:SF0 - PROTEIN BASIC PENTACYSTEINE1-RELATED
Eucgr.G02067	EgMDH14	855	878	+	1.01e-06	ggaacggagagaaagagaaggagc	PTHR31421:SF0 - PROTEIN BASIC PENTACYSTEINE1-RELATED
Eucgr.G02067	EgMDH14	857	880	+	7.68e-06	aacggagagaaagagaaggagctt	PTHR31421:SF0 - PROTEIN BASIC PENTACYSTEINE1-RELATED
Eucgr.G02067	EgMDH5	1632	1655	+	6.92e-06	aagaaaaaaaaaggaggaggaaaa	PTHR31421:SF0 - PROTEIN BASIC PENTACYSTEINE1-RELATED
Eucgr.G02067	EgMDH5	1865	1888	-	4.38e-06	GATTGGGGGAGAGAGGATGGGATG	PTHR31421:SF0 - PROTEIN BASIC PENTACYSTEINE1-RELATED
Eucgr.G02067	EgMDH12	1599	1622	+	5.28e-06	aaaagaaaaagaggaaaaagaaga	PTHR31421:SF0 - PROTEIN BASIC PENTACYSTEINE1-RELATED
Eucgr.G02067	EgMDH12	1601	1624	+	4.31e-06	aagaaaaagaggaaaaagaagaga	PTHR31421:SF0 - PROTEIN BASIC PENTACYSTEINE1-RELATED
Eucgr.G02067	EgMDH12	1908	1931	-	1.51e-06	GAGAGAAAGAGAAGGGTAAGGGAG	PTHR31421:SF0 - PROTEIN BASIC PENTACYSTEINE1-RELATED
Eucgr.G02067	EgMDH12	1910	1933	-	6.02e-07	GAGAGAGAAAGAGAAGGGTAAGGG	PTHR31421:SF0 - PROTEIN BASIC PENTACYSTEINE1-RELATED
Eucgr.G02067	EgMDH12	1912	1935	-	4.15e-07	GAGAGAGAGAAAGAGAAGGGTAAG	PTHR31421:SF0 - PROTEIN BASIC PENTACYSTEINE1-RELATED
Eucgr.G02067	EgMDH12	1914	1937	-	4.3e-10	GAGAGAGAGAGAAAGAGAAGGGTA	PTHR31421:SF0 - PROTEIN BASIC PENTACYSTEINE1-RELATED
Eucgr.G02067	EgMDH12	1916	1939	-	5.88e-10	CAGAGAGAGAGAGAAAGAGAAGGG	PTHR31421:SF0 - PROTEIN BASIC PENTACYSTEINE1-RELATED
Eucgr.G02067	EgMDH12	1918	1941	-	2.92e-08	CTCAGAGAGAGAGAGAAAGAGAAG	PTHR31421:SF0 - PROTEIN BASIC PENTACYSTEINE1-RELATED
Eucgr.G02067	EgMDH12	1920	1943	-	1.79e-08	TACTCAGAGAGAGAGAGAAAGAGA	PTHR31421:SF0 - PROTEIN BASIC PENTACYSTEINE1-RELATED
Eucgr.G02067	EgMDH12	932	955	+	1.5e-07	tccaaggtgagagagagagagaga	PTHR31421:SF0 - PROTEIN BASIC PENTACYSTEINE1-RELATED
Eucgr.G02067	EgMDH12	934	957	+	2.72e-07	caaggtgagagagagagagagaga	PTHR31421:SF0 - PROTEIN BASIC PENTACYSTEINE1-RELATED
Eucgr.G02067	EgMDH12	936	959	+	1.25e-11	aggtgagagagagagagagagaga	PTHR31421:SF0 - PROTEIN BASIC PENTACYSTEINE1-RELATED
Eucgr.G02067	EgMDH12	938	961	+	7.52e-14	gtgagagagagagagagagagaga	PTHR31421:SF0 - PROTEIN BASIC PENTACYSTEINE1-RELATED
Eucgr.G02067	EgMDH12	940	963	+	2.61e-15	gagagagagagagagagagagaga	PTHR31421:SF0 - PROTEIN BASIC PENTACYSTEINE1-RELATED
Eucgr.G02067	EgMDH12	942	965	+	5.37e-14	gagagagagagagagagagagagc	PTHR31421:SF0 - PROTEIN BASIC PENTACYSTEINE1-RELATED
Eucgr.G02067	EgMDH12	944	967	+	1.58e-12	gagagagagagagagagagagcta	PTHR31421:SF0 - PROTEIN BASIC PENTACYSTEINE1-RELATED
Eucgr.G02067	EgMDH12	946	969	+	9.7e-11	gagagagagagagagagagctagg	PTHR31421:SF0 - PROTEIN BASIC PENTACYSTEINE1-RELATED
Eucgr.G02067	EgMDH12	948	971	+	2e-08	gagagagagagagagagctaggga	PTHR31421:SF0 - PROTEIN BASIC PENTACYSTEINE1-RELATED
Eucgr.G02067	EgMDH12	950	973	+	4.13e-08	gagagagagagagagctagggagg	PTHR31421:SF0 - PROTEIN BASIC PENTACYSTEINE1-RELATED
Eucgr.G02067	EgMDH12	952	975	+	5.16e-07	gagagagagagagctagggaggaa	PTHR31421:SF0 - PROTEIN BASIC PENTACYSTEINE1-RELATED
Eucgr.G02067	EgMDH12	954	977	+	7.85e-08	gagagagagagctagggaggaacg	PTHR31421:SF0 - PROTEIN BASIC PENTACYSTEINE1-RELATED
Eucgr.G02067	EgMDH12	956	979	+	1.29e-06	gagagagagctagggaggaacgga	PTHR31421:SF0 - PROTEIN BASIC PENTACYSTEINE1-RELATED
Eucgr.G02163	EgMDH4	1607	1626	+	8.84e-06	aacaaaaaaacagaagttaa	PTHR31636:SF47 - DELLA PROTEIN RGL1-RELATED
Eucgr.G02163	EgMDH4	1954	1973	-	9.34e-06	GAGGAGGAGAAAAAAGTGAA	PTHR31636:SF47 - DELLA PROTEIN RGL1-RELATED
Eucgr.G02163	EgMDH4	1956	1975	-	5.04e-06	GAGAGGAGGAGAAAAAAGTG	PTHR31636:SF47 - DELLA PROTEIN RGL1-RELATED
Eucgr.G02163	EgMDH4	449	468	+	1.33e-06	aagaaaaaaaaaaaagaaaa	PTHR31636:SF47 - DELLA PROTEIN RGL1-RELATED
Eucgr.G02163	EgMDH4	454	473	+	4.69e-06	aaaaaaaaaagaaaaaagat	PTHR31636:SF47 - DELLA PROTEIN RGL1-RELATED
Eucgr.G02163	EgMDH4	456	475	+	4.16e-06	aaaaaaaagaaaaaagataa	PTHR31636:SF47 - DELLA PROTEIN RGL1-RELATED
Eucgr.G02163	EgMDH2	1435	1454	+	1.02e-06	gagagagagagagaaatgaa	PTHR31636:SF47 - DELLA PROTEIN RGL1-RELATED
Eucgr.G02163	EgMDH2	531	550	+	6.97e-06	aaaaagaagagagagagaat	PTHR31636:SF47 - DELLA PROTEIN RGL1-RELATED
Eucgr.G02163	EgMDH10	1729	1748	-	7.81e-06	CAAAAAAAAAAAAAAAAAGG	PTHR31636:SF47 - DELLA PROTEIN RGL1-RELATED
Eucgr.G02163	EgMDH3	1224	1243	+	3.65e-06	gggatacagagaaaggaaga	PTHR31636:SF47 - DELLA PROTEIN RGL1-RELATED
Eucgr.G02163	EgMDH3	465	484	-	4.27e-06	AAAAAACAGACAAAAGCATC	PTHR31636:SF47 - DELLA PROTEIN RGL1-RELATED
Eucgr.G02163	EgMDH1	1953	1972	-	8.36e-06	GAGAGAGAGAGAGAGCGACG	PTHR31636:SF47 - DELLA PROTEIN RGL1-RELATED
Eucgr.G02163	EgMDH1	1955	1974	-	2.89e-06	GAGAGAGAGAGAGAGAGCGA	PTHR31636:SF47 - DELLA PROTEIN RGL1-RELATED
Eucgr.G02163	EgMDH1	1957	1976	-	2.36e-06	GAGAGAGAGAGAGAGAGAGC	PTHR31636:SF47 - DELLA PROTEIN RGL1-RELATED
Eucgr.G02163	EgMDH1	1959	1978	-	2.78e-06	TAGAGAGAGAGAGAGAGAGA	PTHR31636:SF47 - DELLA PROTEIN RGL1-RELATED
Eucgr.G02163	EgMDH1	196	215	+	7.47e-06	gtgagaaagagagagagaga	PTHR31636:SF47 - DELLA PROTEIN RGL1-RELATED
Eucgr.G02163	EgMDH1	1963	1982	-	8.64e-06	GAGGTAGAGAGAGAGAGAGA	PTHR31636:SF47 - DELLA PROTEIN RGL1-RELATED
Eucgr.G02163	EgMDH1	198	217	+	1.64e-07	gagaaagagagagagagaga	PTHR31636:SF47 - DELLA PROTEIN RGL1-RELATED
Eucgr.G02163	EgMDH1	200	219	+	3.11e-06	gaaagagagagagagagaga	PTHR31636:SF47 - DELLA PROTEIN RGL1-RELATED
Eucgr.G02163	EgMDH1	202	221	+	6.96e-07	aagagagagagagagagaga	PTHR31636:SF47 - DELLA PROTEIN RGL1-RELATED
Eucgr.G02163	EgMDH1	204	223	+	5.22e-07	gagagagagagagagagaga	PTHR31636:SF47 - DELLA PROTEIN RGL1-RELATED
Eucgr.G02163	EgMDH1	206	225	+	5.22e-07	gagagagagagagagagaga	PTHR31636:SF47 - DELLA PROTEIN RGL1-RELATED
Eucgr.G02163	EgMDH1	208	227	+	5.22e-07	gagagagagagagagagaga	PTHR31636:SF47 - DELLA PROTEIN RGL1-RELATED
Eucgr.G02163	EgMDH1	210	229	+	5.22e-07	gagagagagagagagagaga	PTHR31636:SF47 - DELLA PROTEIN RGL1-RELATED
Eucgr.G02163	EgMDH1	212	231	+	5.22e-07	gagagagagagagagagaga	PTHR31636:SF47 - DELLA PROTEIN RGL1-RELATED
Eucgr.G02163	EgMDH1	214	233	+	5.22e-07	gagagagagagagagagaga	PTHR31636:SF47 - DELLA PROTEIN RGL1-RELATED
Eucgr.G02163	EgMDH1	216	235	+	5.22e-07	gagagagagagagagagaga	PTHR31636:SF47 - DELLA PROTEIN RGL1-RELATED
Eucgr.G02163	EgMDH1	218	237	+	5.22e-07	gagagagagagagagagaga	PTHR31636:SF47 - DELLA PROTEIN RGL1-RELATED
Eucgr.G02163	EgMDH7	1580	1599	+	6.07e-06	aaagaaaaaagaaaaagagg	PTHR31636:SF47 - DELLA PROTEIN RGL1-RELATED
Eucgr.G02163	EgMDH7	1588	1607	+	3.23e-07	aagaaaaagaggaaaaagaa	PTHR31636:SF47 - DELLA PROTEIN RGL1-RELATED
Eucgr.G02163	EgMDH7	1600	1619	+	3.35e-06	aaaaagaagaaaaaggaaaa	PTHR31636:SF47 - DELLA PROTEIN RGL1-RELATED
Eucgr.G02163	EgMDH7	1908	1927	-	1.6e-06	GAGAGAAAGAGAAGGGTAAG	PTHR31636:SF47 - DELLA PROTEIN RGL1-RELATED
Eucgr.G02163	EgMDH7	1914	1933	-	1.44e-07	GAGAGAGAGAGAAAGAGAAG	PTHR31636:SF47 - DELLA PROTEIN RGL1-RELATED
Eucgr.G02163	EgMDH7	1916	1935	-	2.15e-07	GAGAGAGAGAGAGAAAGAGA	PTHR31636:SF47 - DELLA PROTEIN RGL1-RELATED
Eucgr.G02163	EgMDH7	1918	1937	-	3.23e-07	GAGAGAGAGAGAGAGAAAGA	PTHR31636:SF47 - DELLA PROTEIN RGL1-RELATED
Eucgr.G02163	EgMDH7	1920	1939	-	7.47e-07	CAGAGAGAGAGAGAGAGAAA	PTHR31636:SF47 - DELLA PROTEIN RGL1-RELATED
Eucgr.G02163	EgMDH14	1593	1612	+	6.07e-06	aaagaaaaaagaaaaagagg	PTHR31636:SF47 - DELLA PROTEIN RGL1-RELATED
Eucgr.G02163	EgMDH14	1601	1620	+	3.23e-07	aagaaaaagaggaaaaagaa	PTHR31636:SF47 - DELLA PROTEIN RGL1-RELATED
Eucgr.G02163	EgMDH14	1613	1632	+	3.35e-06	aaaaagaagaaaaaggaaaa	PTHR31636:SF47 - DELLA PROTEIN RGL1-RELATED
Eucgr.G02163	EgMDH14	1910	1929	-	1.6e-06	GAGAGAAAGAGAAGGGTAAG	PTHR31636:SF47 - DELLA PROTEIN RGL1-RELATED
Eucgr.G02163	EgMDH14	1916	1935	-	1.44e-07	GAGAGAGAGAGAAAGAGAAG	PTHR31636:SF47 - DELLA PROTEIN RGL1-RELATED
Eucgr.G02163	EgMDH14	1918	1937	-	2.15e-07	GAGAGAGAGAGAGAAAGAGA	PTHR31636:SF47 - DELLA PROTEIN RGL1-RELATED
Eucgr.G02163	EgMDH14	1920	1939	-	3.6e-07	CAGAGAGAGAGAGAGAAAGA	PTHR31636:SF47 - DELLA PROTEIN RGL1-RELATED
Eucgr.G02163	EgMDH13	646	665	-	8.48e-07	CAGAAAAAGACAAATGCATG	PTHR31636:SF47 - DELLA PROTEIN RGL1-RELATED
Eucgr.G02163	EgMDH13	928	947	-	3.65e-06	CAGAAAAAGACAAATGTGTG	PTHR31636:SF47 - DELLA PROTEIN RGL1-RELATED
Eucgr.G02163	EgMDH5	1417	1436	-	8.55e-06	AAAAAAAAAAAAAAAAAAAA	PTHR31636:SF47 - DELLA PROTEIN RGL1-RELATED
Eucgr.G02163	EgMDH12	1593	1612	+	6.07e-06	aaagaaaaaagaaaaagagg	PTHR31636:SF47 - DELLA PROTEIN RGL1-RELATED
Eucgr.G02163	EgMDH12	1601	1620	+	3.23e-07	aagaaaaagaggaaaaagaa	PTHR31636:SF47 - DELLA PROTEIN RGL1-RELATED
Eucgr.G02163	EgMDH12	1912	1931	-	1.6e-06	GAGAGAAAGAGAAGGGTAAG	PTHR31636:SF47 - DELLA PROTEIN RGL1-RELATED
Eucgr.G02163	EgMDH12	1918	1937	-	1.44e-07	GAGAGAGAGAGAAAGAGAAG	PTHR31636:SF47 - DELLA PROTEIN RGL1-RELATED
Eucgr.G02163	EgMDH12	1920	1939	-	2.41e-07	CAGAGAGAGAGAGAAAGAGA	PTHR31636:SF47 - DELLA PROTEIN RGL1-RELATED
Eucgr.G02163	EgMDH12	940	959	+	5.22e-07	gagagagagagagagagaga	PTHR31636:SF47 - DELLA PROTEIN RGL1-RELATED
Eucgr.G02163	EgMDH12	942	961	+	5.22e-07	gagagagagagagagagaga	PTHR31636:SF47 - DELLA PROTEIN RGL1-RELATED
Eucgr.G02163	EgMDH12	944	963	+	5.22e-07	gagagagagagagagagaga	PTHR31636:SF47 - DELLA PROTEIN RGL1-RELATED
Eucgr.G02163	EgMDH12	946	965	+	2.36e-06	gagagagagagagagagagc	PTHR31636:SF47 - DELLA PROTEIN RGL1-RELATED
Eucgr.G02163	EgMDH12	950	969	+	2.82e-06	gagagagagagagagctagg	PTHR31636:SF47 - DELLA PROTEIN RGL1-RELATED
Eucgr.G02326	EgMDH4	2029	2043	+	1.28e-06	TCACCGGCGCCGCAG	PF00847 - AP2 domain (AP2)
Eucgr.G02326	EgMDH9	1209	1223	-	7.37e-06	GCACCGCCGTCGCAA	PF00847 - AP2 domain (AP2)
Eucgr.G02326	EgMDH9	1212	1226	-	6.19e-06	CTCGCACCGCCGTCG	PF00847 - AP2 domain (AP2)
Eucgr.G02326	EgMDH2	2002	2016	-	7.71e-06	GCTCTGCCACCGCCA	PF00847 - AP2 domain (AP2)
Eucgr.G02326	EgMDH10	1960	1974	+	2.1e-06	ccgctgccaccgcct	PF00847 - AP2 domain (AP2)
Eucgr.G02326	EgMDH10	1973	1987	+	7.28e-07	ctgcctccgccgtcc	PF00847 - AP2 domain (AP2)
Eucgr.G02326	EgMDH11	2082	2096	+	6.77e-07	ACGGCGCCGCCGTCG	PF00847 - AP2 domain (AP2)
Eucgr.G02326	EgMDH11	2299	2313	+	2.04e-06	ACGCCGTCGCCGCCG	PF00847 - AP2 domain (AP2)
Eucgr.G02326	EgMDH11	2302	2316	+	8.26e-06	CCGTCGCCGCCGGGT	PF00847 - AP2 domain (AP2)
Eucgr.G02326	EgMDH8	2692	2706	+	8.46e-06	CCACCGTCGCCACCA	PF00847 - AP2 domain (AP2)
Eucgr.G02326	EgMDH3	1984	1998	-	4.19e-09	CCACCGCCGCCGCTG	PF00847 - AP2 domain (AP2)
Eucgr.G02326	EgMDH3	1987	2001	-	3.58e-07	TTGCCACCGCCGCCG	PF00847 - AP2 domain (AP2)
Eucgr.G02326	EgMDH3	2032	2046	-	2.99e-07	ACCTCGCCGCCGCCG	PF00847 - AP2 domain (AP2)
Eucgr.G02326	EgMDH3	2066	2080	+	2.65e-07	CCTTCTCCGCCGCGG	PF00847 - AP2 domain (AP2)
Eucgr.G02326	EgMDH3	2218	2232	+	7.18e-06	CCGGCGTCGCCGCGG	PF00847 - AP2 domain (AP2)
Eucgr.G02326	EgMDH1	2038	2052	+	7.55e-07	CGTCCTCCGCCGCCC	PF00847 - AP2 domain (AP2)
Eucgr.G02326	EgMDH1	2119	2133	+	5.98e-06	TCGGCGCCGCCGGCG	PF00847 - AP2 domain (AP2)
Eucgr.G02326	EgMDH1	2215	2229	+	1.73e-06	CCGGCGTCGCCGCCG	PF00847 - AP2 domain (AP2)
Eucgr.G02343	EgMDH6	59	71	+	4.14e-06	gattctcagattc	PTHR31003:SF4 - GENOMIC DNA, CHROMOSOME 3, TAC CLONE:K13N2-RELATED
Eucgr.G02459	EgMDH10	2589	2598	+	5.44e-06	GAGGTCAACG	PTHR31221:SF8 - WRKY TRANSCRIPTION FACTOR 57-RELATED
Eucgr.G02486	EgMDH11	2906	2916	-	3.81e-06	ACACGTCACCG	PTHR31719:SF40 - NAC TRANSCRIPTION FACTOR 29
Eucgr.G02520	EgMDH5	36	46	-	4.35e-06	ACAATAATTGA	PTHR24326:SF176 - HOMEOBOX-LEUCINE ZIPPER PROTEIN ATHB-13-RELATED
Eucgr.G02520	EgMDH5	665	675	-	6.11e-06	TTAATAATTGA	PTHR24326:SF176 - HOMEOBOX-LEUCINE ZIPPER PROTEIN ATHB-13-RELATED
Eucgr.G02838	EgMDH8	1527	1547	-	3.15e-06	TTTTCCATTTTGACGTGGAAT	PTHR31384:SF27 - AUXIN RESPONSE FACTOR 10-RELATED
Eucgr.G02838	EgMDH8	797	817	-	7.48e-06	TAAATATTTTTTGGGTGAAAA	PTHR31384:SF27 - AUXIN RESPONSE FACTOR 10-RELATED
Eucgr.G03029	EgMDH7	1738	1751	-	4.09e-06	AATCTTATCATATT	PTHR24078:SF261 - DNAJ (HSP40) HOMOLOG, SUBFAMILY A, MEMBER 3A
Eucgr.G03029	EgMDH14	1751	1764	-	4.09e-06	AATCTTATCATATT	PTHR24078:SF261 - DNAJ (HSP40) HOMOLOG, SUBFAMILY A, MEMBER 3A
Eucgr.G03029	EgMDH12	1735	1748	-	4.09e-06	AATCTTATCATATT	PTHR24078:SF261 - DNAJ (HSP40) HOMOLOG, SUBFAMILY A, MEMBER 3A
Eucgr.G03094	EgMDH2	1991	2011	+	5.35e-06	ctctgctgcaATGGCGGTGGC	PTHR31241:SF2 - DEHYDRATION-RESPONSIVE ELEMENT-BINDING PROTEIN 2A-RELATED
Eucgr.G03094	EgMDH10	1953	1973	-	1.02e-08	GGCGGTGGCAGCGGTGGTGCG	PTHR31241:SF2 - DEHYDRATION-RESPONSIVE ELEMENT-BINDING PROTEIN 2A-RELATED
Eucgr.G03094	EgMDH10	1956	1976	-	7.1e-09	GCAGGCGGTGGCAGCGGTGGT	PTHR31241:SF2 - DEHYDRATION-RESPONSIVE ELEMENT-BINDING PROTEIN 2A-RELATED
Eucgr.G03094	EgMDH10	2118	2138	-	4.46e-06	GCCGGCTCCGACGACGGTGAT	PTHR31241:SF2 - DEHYDRATION-RESPONSIVE ELEMENT-BINDING PROTEIN 2A-RELATED
Eucgr.G03094	EgMDH10	2271	2291	-	2.23e-06	GGAGGAGAGGATGGTGGTGCG	PTHR31241:SF2 - DEHYDRATION-RESPONSIVE ELEMENT-BINDING PROTEIN 2A-RELATED
Eucgr.G03094	EgMDH10	2274	2294	-	5.45e-07	GGAGGAGGAGAGGATGGTGGT	PTHR31241:SF2 - DEHYDRATION-RESPONSIVE ELEMENT-BINDING PROTEIN 2A-RELATED
Eucgr.G03094	EgMDH10	2286	2306	-	9.7e-06	GGCATAGTCGGAGGAGGAGGA	PTHR31241:SF2 - DEHYDRATION-RESPONSIVE ELEMENT-BINDING PROTEIN 2A-RELATED
Eucgr.G03094	EgMDH10	2292	2312	-	1.61e-06	GGTGACGGCATAGTCGGAGGA	PTHR31241:SF2 - DEHYDRATION-RESPONSIVE ELEMENT-BINDING PROTEIN 2A-RELATED
Eucgr.G03094	EgMDH11	2286	2306	-	6.46e-07	GACGGCGTAGTCGACGGAGGC	PTHR31241:SF2 - DEHYDRATION-RESPONSIVE ELEMENT-BINDING PROTEIN 2A-RELATED
Eucgr.G03094	EgMDH8	2688	2708	-	9.62e-06	GCTGGTGGCGACGGTGGCGTG	PTHR31241:SF2 - DEHYDRATION-RESPONSIVE ELEMENT-BINDING PROTEIN 2A-RELATED
Eucgr.G03094	EgMDH8	2691	2711	-	6.52e-07	ACTGCTGGTGGCGACGGTGGC	PTHR31241:SF2 - DEHYDRATION-RESPONSIVE ELEMENT-BINDING PROTEIN 2A-RELATED
Eucgr.G03094	EgMDH3	1973	1993	+	4.46e-06	agaagaagcggcagcggcggc	PTHR31241:SF2 - DEHYDRATION-RESPONSIVE ELEMENT-BINDING PROTEIN 2A-RELATED
Eucgr.G03094	EgMDH3	1976	1996	+	1.41e-08	agaagcggcagcggcggcggt	PTHR31241:SF2 - DEHYDRATION-RESPONSIVE ELEMENT-BINDING PROTEIN 2A-RELATED
Eucgr.G03094	EgMDH3	1979	1999	+	3.12e-09	agcggcagcggcggcggtggc	PTHR31241:SF2 - DEHYDRATION-RESPONSIVE ELEMENT-BINDING PROTEIN 2A-RELATED
Eucgr.G03094	EgMDH1	2093	2113	+	8.99e-06	GGTGCCGGAGCGGAAGGTGGC	PTHR31241:SF2 - DEHYDRATION-RESPONSIVE ELEMENT-BINDING PROTEIN 2A-RELATED
Eucgr.G03094	EgMDH1	2220	2240	-	4.42e-06	GTGGCCGACGTCGGCGGCGAC	PTHR31241:SF2 - DEHYDRATION-RESPONSIVE ELEMENT-BINDING PROTEIN 2A-RELATED
Eucgr.G03094	EgMDH14	1659	1679	+	5.23e-06	ggatgaaggggagacggtgga	PTHR31241:SF2 - DEHYDRATION-RESPONSIVE ELEMENT-BINDING PROTEIN 2A-RELATED
Eucgr.G03094	EgMDH14	1662	1682	+	1.43e-06	tgaaggggagacggtggagga	PTHR31241:SF2 - DEHYDRATION-RESPONSIVE ELEMENT-BINDING PROTEIN 2A-RELATED
Eucgr.G03094	EgMDH5	1688	1708	+	1.52e-06	ggatgaagtggagacggtgga	PTHR31241:SF2 - DEHYDRATION-RESPONSIVE ELEMENT-BINDING PROTEIN 2A-RELATED
Eucgr.G03094	EgMDH5	1691	1711	+	8.97e-08	tgaagtggagacggtggagga	PTHR31241:SF2 - DEHYDRATION-RESPONSIVE ELEMENT-BINDING PROTEIN 2A-RELATED
Eucgr.G03135	EgMDH2	2766	2776	-	2.21e-07	GCCAGCTGGCA	PF00170 - bZIP transcription factor (bZIP_1)
Eucgr.G03135	EgMDH2	2767	2777	+	2.21e-07	GCCAGCTGGCA	PF00170 - bZIP transcription factor (bZIP_1)
Eucgr.G03135	EgMDH13	2696	2706	+	7.49e-06	GAAAGCTGGCA	PF00170 - bZIP transcription factor (bZIP_1)
Eucgr.G03135	EgMDH5	2528	2538	+	7.49e-06	GAAAGCTGGCA	PF00170 - bZIP transcription factor (bZIP_1)
Eucgr.G03284	EgMDH11	845	863	+	4.81e-06	ccttcttttctgggaaagt	PTHR11945//PTHR11945:SF237 - MADS BOX PROTEIN
Eucgr.G03284	EgMDH3	1799	1817	+	8.2e-06	ttttccatttcgagataat	PTHR11945//PTHR11945:SF237 - MADS BOX PROTEIN
Eucgr.G03284	EgMDH1	1228	1246	-	2.94e-06	TTTTCCACATTAAGAAAAA	PTHR11945//PTHR11945:SF237 - MADS BOX PROTEIN
Eucgr.G03385	EgMDH5	230	240	+	2.83e-06	ttggttggtgg	PTHR10641//PTHR10641:SF577 - MYB-LIKE DNA-BINDING PROTEIN MYB
Eucgr.H00105	EgMDH6	3007	3021	+	1.1e-06	atggagatggagatg	PTHR10071:SF212 - GATA TRANSCRIPTION FACTOR 1
Eucgr.H00105	EgMDH10	1955	1969	-	7.88e-06	GTGGCAGCGGTGGTG	PTHR10071:SF212 - GATA TRANSCRIPTION FACTOR 1
Eucgr.H00105	EgMDH8	2690	2704	-	8.03e-06	GTGGCGACGGTGGCG	PTHR10071:SF212 - GATA TRANSCRIPTION FACTOR 1
Eucgr.H00105	EgMDH14	2184	2198	+	8.61e-06	ATGTTGATGAAGATC	PTHR10071:SF212 - GATA TRANSCRIPTION FACTOR 1
Eucgr.H00105	EgMDH12	2184	2198	+	8.61e-06	ATGTTGATGAAGATC	PTHR10071:SF212 - GATA TRANSCRIPTION FACTOR 1
Eucgr.H00158	EgMDH11	1913	1933	+	3.25e-06	atcgaactgccctaccaaccc	PTHR10641//PTHR10641:SF650 - MYB-LIKE DNA-BINDING PROTEIN MYB
Eucgr.H00158	EgMDH5	231	251	-	1.29e-06	ATCAAACTGGTCCACCAACCA	PTHR10641//PTHR10641:SF650 - MYB-LIKE DNA-BINDING PROTEIN MYB
Eucgr.H00174	EgMDH11	2428	2437	+	8.29e-06	GGCACGCGCC	PTHR23042:SF72 - TRANSCRIPTION FACTOR BHLH104-RELATED
Eucgr.H00174	EgMDH11	2428	2437	-	8.29e-06	GGCGCGTGCC	PTHR23042:SF72 - TRANSCRIPTION FACTOR BHLH104-RELATED
Eucgr.H00609	EgMDH7	564	574	-	9.13e-06	GCATTAAATGG	PTHR24326:SF236 - HOMEOBOX-LEUCINE ZIPPER PROTEIN HDG12
Eucgr.H00748	EgMDH2	2026	2033	+	7.24e-06	CCACGTGC	PTHR12565//PTHR12565:SF99 - STEROL REGULATORY ELEMENT-BINDING PROTEIN
Eucgr.H00748	EgMDH5	741	748	-	7.24e-06	CCACGTGC	PTHR12565//PTHR12565:SF99 - STEROL REGULATORY ELEMENT-BINDING PROTEIN
Eucgr.H00815	EgMDH4	2356	2364	-	5.79e-06	CTGCATGCT	PTHR31140:SF1 - B3 DOMAIN-CONTAINING TRANSCRIPTION FACTOR ABI3
Eucgr.H01659	EgMDH11	2076	2090	+	3.91e-06	CAGGAGACGGCGCCG	PF00847 - AP2 domain (AP2)
Eucgr.H01659	EgMDH11	2083	2097	-	2.09e-06	ACGACGGCGGCGCCG	PF00847 - AP2 domain (AP2)
Eucgr.H01659	EgMDH11	2086	2100	-	4.57e-06	TGGACGACGGCGGCG	PF00847 - AP2 domain (AP2)
Eucgr.H01659	EgMDH11	2252	2266	-	1.94e-07	AGGAAGGCGGCGGCG	PF00847 - AP2 domain (AP2)
Eucgr.H01659	EgMDH3	1980	1994	+	4.72e-06	gcggcagcggcggcg	PF00847 - AP2 domain (AP2)
Eucgr.H01659	EgMDH3	1983	1997	+	5.54e-06	gcagcggcggcggtg	PF00847 - AP2 domain (AP2)
Eucgr.H01659	EgMDH3	2028	2042	+	3.29e-06	cgatcggcggcggcg	PF00847 - AP2 domain (AP2)
Eucgr.H01971	EgMDH4	1134	1154	+	7.41e-06	atttttggtcttcaacttttt	PTHR31992:SF12 - DOF ZINC FINGER PROTEIN DOF3.4
Eucgr.H01971	EgMDH4	1688	1708	+	1.8e-06	ggctctctctctttacttttt	PTHR31992:SF12 - DOF ZINC FINGER PROTEIN DOF3.4
Eucgr.H01971	EgMDH4	435	455	-	8.86e-06	TTTTCTTTTTAGCTACTTTTA	PTHR31992:SF12 - DOF ZINC FINGER PROTEIN DOF3.4
Eucgr.H01971	EgMDH4	446	466	-	9.62e-10	TTCTTTTTTTTTTTTCTTTTT	PTHR31992:SF12 - DOF ZINC FINGER PROTEIN DOF3.4
Eucgr.H01971	EgMDH4	459	479	-	4.6e-07	ATCTTTATCTTTTTTCTTTTT	PTHR31992:SF12 - DOF ZINC FINGER PROTEIN DOF3.4
Eucgr.H01971	EgMDH9	777	797	-	6.37e-06	TGCCTTTTTTTTGCCCTTTTC	PTHR31992:SF12 - DOF ZINC FINGER PROTEIN DOF3.4
Eucgr.H01971	EgMDH2	102	122	-	1.43e-08	TCGATTTTTTTTTTCCTTTTT	PTHR31992:SF12 - DOF ZINC FINGER PROTEIN DOF3.4
Eucgr.H01971	EgMDH2	531	551	-	3.73e-06	TATTCTCTCTCTCTTCTTTTT	PTHR31992:SF12 - DOF ZINC FINGER PROTEIN DOF3.4
Eucgr.H01971	EgMDH2	750	770	+	5.27e-08	caattttcttttttccttttt	PTHR31992:SF12 - DOF ZINC FINGER PROTEIN DOF3.4
Eucgr.H01971	EgMDH6	1198	1218	+	8.73e-06	tttctttttacctaacttttg	PTHR31992:SF12 - DOF ZINC FINGER PROTEIN DOF3.4
Eucgr.H01971	EgMDH10	1277	1297	+	7.08e-06	catattttgatttcccttttt	PTHR31992:SF12 - DOF ZINC FINGER PROTEIN DOF3.4
Eucgr.H01971	EgMDH8	1436	1456	-	2.54e-06	CGTTTTTTTTTTTTTCTTTAA	PTHR31992:SF12 - DOF ZINC FINGER PROTEIN DOF3.4
Eucgr.H01971	EgMDH8	1740	1760	+	4.74e-06	ttggttttcctcctccttttt	PTHR31992:SF12 - DOF ZINC FINGER PROTEIN DOF3.4
Eucgr.H01971	EgMDH1	1165	1185	+	8.86e-06	ctgcttttagtttttcttttc	PTHR31992:SF12 - DOF ZINC FINGER PROTEIN DOF3.4
Eucgr.H01971	EgMDH1	1176	1196	+	7.52e-06	ttttcttttcaacttcttttt	PTHR31992:SF12 - DOF ZINC FINGER PROTEIN DOF3.4
Eucgr.H01971	EgMDH7	1578	1598	-	1.96e-06	CTCTTTTTCTTTTTTCTTTCT	PTHR31992:SF12 - DOF ZINC FINGER PROTEIN DOF3.4
Eucgr.H01971	EgMDH7	1585	1605	-	5.13e-08	CTTTTTCCTCTTTTTCTTTTT	PTHR31992:SF12 - DOF ZINC FINGER PROTEIN DOF3.4
Eucgr.H01971	EgMDH7	1591	1611	-	5.54e-08	TTTCTTCTTTTTCCTCTTTTT	PTHR31992:SF12 - DOF ZINC FINGER PROTEIN DOF3.4
Eucgr.H01971	EgMDH7	1600	1620	-	3.74e-07	GTTTTCCTTTTTCTTCTTTTT	PTHR31992:SF12 - DOF ZINC FINGER PROTEIN DOF3.4
Eucgr.H01971	EgMDH7	1609	1629	-	3.23e-07	CTTCTCTTCGTTTTCCTTTTT	PTHR31992:SF12 - DOF ZINC FINGER PROTEIN DOF3.4
Eucgr.H01971	EgMDH14	1591	1611	-	1.96e-06	CTCTTTTTCTTTTTTCTTTCT	PTHR31992:SF12 - DOF ZINC FINGER PROTEIN DOF3.4
Eucgr.H01971	EgMDH14	1598	1618	-	5.13e-08	CTTTTTCCTCTTTTTCTTTTT	PTHR31992:SF12 - DOF ZINC FINGER PROTEIN DOF3.4
Eucgr.H01971	EgMDH14	1604	1624	-	5.54e-08	TTTCTTCTTTTTCCTCTTTTT	PTHR31992:SF12 - DOF ZINC FINGER PROTEIN DOF3.4
Eucgr.H01971	EgMDH14	1613	1633	-	3.74e-07	GTTTTCCTTTTTCTTCTTTTT	PTHR31992:SF12 - DOF ZINC FINGER PROTEIN DOF3.4
Eucgr.H01971	EgMDH14	1622	1642	-	3.23e-07	CTTCTCTTCGTTTTCCTTTTT	PTHR31992:SF12 - DOF ZINC FINGER PROTEIN DOF3.4
Eucgr.H01971	EgMDH5	1531	1551	-	8.96e-07	AATTATTTTTTCTTCCTTTTT	PTHR31992:SF12 - DOF ZINC FINGER PROTEIN DOF3.4
Eucgr.H01971	EgMDH5	1639	1659	-	1.54e-07	TTCCTTTTCCTCCTCCTTTTT	PTHR31992:SF12 - DOF ZINC FINGER PROTEIN DOF3.4
Eucgr.H01971	EgMDH12	110	130	-	1.45e-06	TCTATTTTCTATCTTCTTTTT	PTHR31992:SF12 - DOF ZINC FINGER PROTEIN DOF3.4
Eucgr.H01971	EgMDH12	1598	1618	-	5.13e-08	CTTTTTCCTCTTTTTCTTTTT	PTHR31992:SF12 - DOF ZINC FINGER PROTEIN DOF3.4
Eucgr.H01971	EgMDH12	1604	1624	-	8.6e-08	TCTCTTCTTTTTCCTCTTTTT	PTHR31992:SF12 - DOF ZINC FINGER PROTEIN DOF3.4
Eucgr.H01971	EgMDH12	1613	1633	-	3.79e-06	TTTGCTTCTTCTCTTCTTTTT	PTHR31992:SF12 - DOF ZINC FINGER PROTEIN DOF3.4
Eucgr.H01993	EgMDH13	57	67	-	5.74e-06	ACAAAGATTCC	PTHR31003:SF5 - MYB FAMILY TRANSCRIPTION FACTOR
Eucgr.H02094	EgMDH4	2258	2274	+	1.81e-06	CATGGTCGGTGGCTTCC	PTHR31729:SF0 - ETHYLENE-RESPONSIVE TRANSCRIPTION FACTOR ERF008-RELATED
Eucgr.H03870	EgMDH4	2029	2043	+	9.65e-07	TCACCGGCGCCGCAG	PF00847 - AP2 domain (AP2)
Eucgr.H03870	EgMDH9	1212	1226	-	7.64e-06	CTCGCACCGCCGTCG	PF00847 - AP2 domain (AP2)
Eucgr.H03870	EgMDH10	1973	1987	+	3.81e-07	ctgcctccgccgtcc	PF00847 - AP2 domain (AP2)
Eucgr.H03870	EgMDH11	2079	2093	+	7.71e-06	GAGACGGCGCCGCCG	PF00847 - AP2 domain (AP2)
Eucgr.H03870	EgMDH11	2080	2094	-	4.52e-06	ACGGCGGCGCCGTCT	PF00847 - AP2 domain (AP2)
Eucgr.H03870	EgMDH11	2082	2096	+	4.84e-07	ACGGCGCCGCCGTCG	PF00847 - AP2 domain (AP2)
Eucgr.H03870	EgMDH11	2248	2262	+	9.46e-06	AGCACGCCGCCGCCT	PF00847 - AP2 domain (AP2)
Eucgr.H03870	EgMDH11	2299	2313	+	1.2e-06	ACGCCGTCGCCGCCG	PF00847 - AP2 domain (AP2)
Eucgr.H03870	EgMDH11	2302	2316	+	5.61e-06	CCGTCGCCGCCGGGT	PF00847 - AP2 domain (AP2)
Eucgr.H03870	EgMDH3	1984	1998	-	4.7e-09	CCACCGCCGCCGCTG	PF00847 - AP2 domain (AP2)
Eucgr.H03870	EgMDH3	1987	2001	-	6.53e-07	TTGCCACCGCCGCCG	PF00847 - AP2 domain (AP2)
Eucgr.H03870	EgMDH3	2032	2046	-	3.69e-07	ACCTCGCCGCCGCCG	PF00847 - AP2 domain (AP2)
Eucgr.H03870	EgMDH3	2066	2080	+	5.9e-07	CCTTCTCCGCCGCGG	PF00847 - AP2 domain (AP2)
Eucgr.H03870	EgMDH1	2038	2052	+	1.19e-06	CGTCCTCCGCCGCCC	PF00847 - AP2 domain (AP2)
Eucgr.H03870	EgMDH1	2119	2133	+	5.47e-06	TCGGCGCCGCCGGCG	PF00847 - AP2 domain (AP2)
Eucgr.H03870	EgMDH1	2215	2229	+	2.11e-06	CCGGCGTCGCCGCCG	PF00847 - AP2 domain (AP2)
Eucgr.H03870	EgMDH1	2218	2232	+	6.39e-06	GCGTCGCCGCCGACG	PF00847 - AP2 domain (AP2)
Eucgr.H03965	EgMDH2	356	363	-	7.62e-06	CCGCCGCC	PF00847 - AP2 domain (AP2)
Eucgr.H03965	EgMDH11	2085	2092	+	3.81e-06	GCGCCGCC	PF00847 - AP2 domain (AP2)
Eucgr.H03965	EgMDH11	2254	2261	+	7.62e-06	CCGCCGCC	PF00847 - AP2 domain (AP2)
Eucgr.H03965	EgMDH3	1988	1995	-	7.62e-06	CCGCCGCC	PF00847 - AP2 domain (AP2)
Eucgr.H03965	EgMDH3	2033	2040	-	7.62e-06	CCGCCGCC	PF00847 - AP2 domain (AP2)
Eucgr.H03965	EgMDH1	2044	2051	+	7.62e-06	CCGCCGCC	PF00847 - AP2 domain (AP2)
Eucgr.H03965	EgMDH1	2122	2129	+	3.81e-06	GCGCCGCC	PF00847 - AP2 domain (AP2)
Eucgr.H03965	EgMDH13	2331	2338	+	3.81e-06	GCGCCGCC	PF00847 - AP2 domain (AP2)
Eucgr.H04023	EgMDH7	2178	2204	-	1.98e-06	CAGGTTGATGTTCATCAACATCACCAG	PTHR10071:SF203 - GATA TRANSCRIPTION FACTOR 15-RELATED
Eucgr.H04023	EgMDH14	2178	2204	-	2.76e-06	CAGGTTGATCTTCATCAACATCGCCAG	PTHR10071:SF203 - GATA TRANSCRIPTION FACTOR 15-RELATED
Eucgr.H04617	EgMDH2	1220	1232	-	1.11e-06	CCAAAATTGGAAA	PTHR11945//PTHR11945:SF196 - MADS BOX PROTEIN
Eucgr.H04617	EgMDH1	136	148	-	7.8e-07	CCAAAAAAGGATA	PTHR11945//PTHR11945:SF196 - MADS BOX PROTEIN
Eucgr.H04618	EgMDH2	1217	1237	-	5.55e-06	ATAGCCCAAAATTGGAAATCA	KOG0014 - MADS box transcription factor
Eucgr.H04618	EgMDH3	1797	1817	-	7.6e-07	ATTATCTCGAAATGGAAAAAA	KOG0014 - MADS box transcription factor
Eucgr.H04693	EgMDH9	1679	1688	+	7.46e-06	aaagattcgg	PTHR26402//PTHR26402:SF608 - RESPONSE REGULATOR OF TWO-COMPONENT SYSTEM
Eucgr.H04783	EgMDH11	450	458	-	8.57e-06	CCGCGTGGC	PTHR23335 - CALMODULIN-BINDING TRANSCRIPTION ACTIVATOR CAMTA
Eucgr.H04824	EgMDH7	1820	1830	+	6.68e-06	tcacgtcatct	PTHR22952:SF180 - TRANSCRIPTION FACTOR TGA1-RELATED
Eucgr.H04824	EgMDH14	1833	1843	+	6.68e-06	tcacgtcatct	PTHR22952:SF180 - TRANSCRIPTION FACTOR TGA1-RELATED
Eucgr.H04824	EgMDH5	1852	1862	+	6.68e-06	tcacgtcatct	PTHR22952:SF180 - TRANSCRIPTION FACTOR TGA1-RELATED
Eucgr.H04824	EgMDH12	1817	1827	+	6.68e-06	tcacgtcatct	PTHR22952:SF180 - TRANSCRIPTION FACTOR TGA1-RELATED
Eucgr.I00442	EgMDH6	1204	1213	-	7.03e-06	GTTAGGTAAA	PTHR10641:SF537 - F21H2.9 PROTEIN-RELATED
Eucgr.I00556	EgMDH2	1218	1232	+	7.98e-06	gatttccaattttgg	PTHR11945:SF179 - MADS-BOX PROTEIN SVP
Eucgr.I00556	EgMDH2	1580	1594	-	6.06e-06	ACTGTCCTGTTTGGG	PTHR11945:SF179 - MADS-BOX PROTEIN SVP
Eucgr.I00556	EgMDH1	134	148	+	3.78e-06	tttatccttttttgg	PTHR11945:SF179 - MADS-BOX PROTEIN SVP
Eucgr.I00564	EgMDH8	960	974	+	6.54e-06	cctcggtaatcgttt	PTHR32467:SF33 - AP2-LIKE ETHYLENE-RESPONSIVE TRANSCRIPTION FACTOR AIL6-RELATED
Eucgr.I00564	EgMDH3	2086	2100	+	1.09e-06	GCTCGGAATCCGTGC	PTHR32467:SF33 - AP2-LIKE ETHYLENE-RESPONSIVE TRANSCRIPTION FACTOR AIL6-RELATED
Eucgr.I00663	EgMDH4	2257	2269	+	7.94e-06	TCATGGTCGGTGG	PTHR10641:SF654 - TRANSCRIPTION FACTOR RAX1-RELATED
Eucgr.I00663	EgMDH2	1621	1633	-	2.62e-06	CGATGGTTGGTGC	PTHR10641:SF654 - TRANSCRIPTION FACTOR RAX1-RELATED
Eucgr.I00663	EgMDH5	1270	1282	-	5.34e-06	TGAAGGTAGGTGT	PTHR10641:SF654 - TRANSCRIPTION FACTOR RAX1-RELATED
Eucgr.I00906	EgMDH2	2025	2033	+	1.52e-06	CCCACGTGC	PTHR12565:SF87 - TRANSCRIPTION FACTOR ALC-RELATED
Eucgr.I01053	EgMDH5	874	882	+	9.49e-06	tttaggttg	PTHR21717:SF27 - TELOMERE REPEAT-BINDING FACTOR 2-RELATED
Eucgr.I01406	EgMDH6	1204	1218	-	1.75e-06	CAAAAGTTAGGTAAA	PTHR10641:SF588 - TRANSCRIPTION REPRESSOR MYB4
Eucgr.I01406	EgMDH5	873	887	+	6.04e-06	ctttaggttggtagt	PTHR10641:SF588 - TRANSCRIPTION REPRESSOR MYB4
Eucgr.I01576	EgMDH2	1994	2014	-	3.98e-06	TCTGCCACCGCCATTGCAGCA	PTHR31677:SF5 - ETHYLENE-RESPONSIVE TRANSCRIPTION FACTOR LEP
Eucgr.I01576	EgMDH10	1953	1973	+	4.44e-07	cgcaccaccgctgccaccgcc	PTHR31677:SF5 - ETHYLENE-RESPONSIVE TRANSCRIPTION FACTOR LEP
Eucgr.I01576	EgMDH10	1956	1976	+	3.56e-06	accaccgctgccaccgcctgc	PTHR31677:SF5 - ETHYLENE-RESPONSIVE TRANSCRIPTION FACTOR LEP
Eucgr.I01576	EgMDH10	1975	1995	+	2.96e-06	gcctccgccgtcccaccacga	PTHR31677:SF5 - ETHYLENE-RESPONSIVE TRANSCRIPTION FACTOR LEP
Eucgr.I01576	EgMDH10	2118	2138	+	8.91e-06	ATCACCGTCGTCGGAGCCGGC	PTHR31677:SF5 - ETHYLENE-RESPONSIVE TRANSCRIPTION FACTOR LEP
Eucgr.I01576	EgMDH10	2289	2309	+	9.14e-06	tcctcctccgactaTGCCGTC	PTHR31677:SF5 - ETHYLENE-RESPONSIVE TRANSCRIPTION FACTOR LEP
Eucgr.I01576	EgMDH11	2072	2092	-	5.03e-06	GGCGGCGCCGTCTCCTGGATC	PTHR31677:SF5 - ETHYLENE-RESPONSIVE TRANSCRIPTION FACTOR LEP
Eucgr.I01576	EgMDH11	2081	2101	+	5.15e-07	GACGGCGCCGCCGTCGTCCAC	PTHR31677:SF5 - ETHYLENE-RESPONSIVE TRANSCRIPTION FACTOR LEP
Eucgr.I01576	EgMDH11	2084	2104	+	2.37e-06	GGCGCCGCCGTCGTCCACCAA	PTHR31677:SF5 - ETHYLENE-RESPONSIVE TRANSCRIPTION FACTOR LEP
Eucgr.I01576	EgMDH11	2250	2270	+	1.67e-07	CACGCCGCCGCCTTCCTCCCC	PTHR31677:SF5 - ETHYLENE-RESPONSIVE TRANSCRIPTION FACTOR LEP
Eucgr.I01576	EgMDH11	2286	2306	+	4.16e-06	GCCTCCGTCGACTACGCCGTC	PTHR31677:SF5 - ETHYLENE-RESPONSIVE TRANSCRIPTION FACTOR LEP
Eucgr.I01576	EgMDH11	2295	2315	+	9.61e-06	GACTACGCCGTCGCCGCCGGG	PTHR31677:SF5 - ETHYLENE-RESPONSIVE TRANSCRIPTION FACTOR LEP
Eucgr.I01576	EgMDH11	2298	2318	+	2.82e-06	TACGCCGTCGCCGCCGGGTCC	PTHR31677:SF5 - ETHYLENE-RESPONSIVE TRANSCRIPTION FACTOR LEP
Eucgr.I01576	EgMDH11	2301	2321	+	2.09e-07	GCCGTCGCCGCCGGGTCCGAC	PTHR31677:SF5 - ETHYLENE-RESPONSIVE TRANSCRIPTION FACTOR LEP
Eucgr.I01576	EgMDH11	2304	2324	+	3.53e-06	GTCGCCGCCGGGTCCGACCTC	PTHR31677:SF5 - ETHYLENE-RESPONSIVE TRANSCRIPTION FACTOR LEP
Eucgr.I01576	EgMDH8	2688	2708	+	2.87e-06	CACGCCACCGTCGCCACCAGC	PTHR31677:SF5 - ETHYLENE-RESPONSIVE TRANSCRIPTION FACTOR LEP
Eucgr.I01576	EgMDH3	1973	1993	-	7.59e-06	GCCGCCGCTGCCGCTTCTTCT	PTHR31677:SF5 - ETHYLENE-RESPONSIVE TRANSCRIPTION FACTOR LEP
Eucgr.I01576	EgMDH3	1976	1996	-	1.01e-08	ACCGCCGCCGCTGCCGCTTCT	PTHR31677:SF5 - ETHYLENE-RESPONSIVE TRANSCRIPTION FACTOR LEP
Eucgr.I01576	EgMDH3	1979	1999	-	2.8e-10	GCCACCGCCGCCGCTGCCGCT	PTHR31677:SF5 - ETHYLENE-RESPONSIVE TRANSCRIPTION FACTOR LEP
Eucgr.I01576	EgMDH3	1982	2002	-	5.82e-07	ATTGCCACCGCCGCCGCTGCC	PTHR31677:SF5 - ETHYLENE-RESPONSIVE TRANSCRIPTION FACTOR LEP
Eucgr.I01576	EgMDH3	2068	2088	+	8.61e-07	TTCTCCGCCGCGGATTCAGCT	PTHR31677:SF5 - ETHYLENE-RESPONSIVE TRANSCRIPTION FACTOR LEP
Eucgr.I01576	EgMDH3	2217	2237	+	4.56e-06	CCCGGCGTCGCCGCGGACGTC	PTHR31677:SF5 - ETHYLENE-RESPONSIVE TRANSCRIPTION FACTOR LEP
Eucgr.I01576	EgMDH3	2220	2240	+	1.86e-06	GGCGTCGCCGCGGACGTCGGC	PTHR31677:SF5 - ETHYLENE-RESPONSIVE TRANSCRIPTION FACTOR LEP
Eucgr.I01576	EgMDH1	2040	2060	+	4.6e-06	TCCTCCGCCGCCCCGCGGCCG	PTHR31677:SF5 - ETHYLENE-RESPONSIVE TRANSCRIPTION FACTOR LEP
Eucgr.I01576	EgMDH1	2118	2138	+	4.09e-06	CTCGGCGCCGCCGGCGGGATC	PTHR31677:SF5 - ETHYLENE-RESPONSIVE TRANSCRIPTION FACTOR LEP
Eucgr.I01576	EgMDH1	2121	2141	+	2.42e-06	GGCGCCGCCGGCGGGATCGGC	PTHR31677:SF5 - ETHYLENE-RESPONSIVE TRANSCRIPTION FACTOR LEP
Eucgr.I01576	EgMDH1	2214	2234	+	1.14e-06	CCCGGCGTCGCCGCCGACGTC	PTHR31677:SF5 - ETHYLENE-RESPONSIVE TRANSCRIPTION FACTOR LEP
Eucgr.I01576	EgMDH1	2217	2237	+	1.16e-07	GGCGTCGCCGCCGACGTCGGC	PTHR31677:SF5 - ETHYLENE-RESPONSIVE TRANSCRIPTION FACTOR LEP
Eucgr.I01576	EgMDH1	2220	2240	+	1.2e-06	GTCGCCGCCGACGTCGGCCAC	PTHR31677:SF5 - ETHYLENE-RESPONSIVE TRANSCRIPTION FACTOR LEP
Eucgr.I01576	EgMDH14	1662	1682	-	3.53e-06	TCCTCCACCGTCTCCCCTTCA	PTHR31677:SF5 - ETHYLENE-RESPONSIVE TRANSCRIPTION FACTOR LEP
Eucgr.I01576	EgMDH13	2327	2347	+	2.49e-06	TCAGGCGCCGCCAGAACCTGC	PTHR31677:SF5 - ETHYLENE-RESPONSIVE TRANSCRIPTION FACTOR LEP
Eucgr.I01576	EgMDH5	1691	1711	-	2.31e-06	TCCTCCACCGTCTCCACTTCA	PTHR31677:SF5 - ETHYLENE-RESPONSIVE TRANSCRIPTION FACTOR LEP
Eucgr.I01817	EgMDH5	36	46	-	1.27e-06	ACAATAATTGA	PTHR24326:SF136 - HOMEOBOX-LEUCINE ZIPPER PROTEIN ATHB-54-RELATED
Eucgr.I01817	EgMDH5	665	675	-	8.08e-06	TTAATAATTGA	PTHR24326:SF136 - HOMEOBOX-LEUCINE ZIPPER PROTEIN ATHB-54-RELATED
Eucgr.I02057	EgMDH6	1203	1216	-	4.47e-08	AAAGTTAGGTAAAA	PTHR10641:SF572 - MYB TRANSCRIPTION FACTOR
Eucgr.I02155	EgMDH2	1993	2013	+	1.42e-06	ctgctgcaATGGCGGTGGCAG	PTHR31190:SF4 - ETHYLENE-RESPONSIVE TRANSCRIPTION FACTOR ERF071-RELATED
Eucgr.I02155	EgMDH11	2007	2027	-	7.13e-06	GGAGGAAGACGACGGCGCCTT	PTHR31190:SF4 - ETHYLENE-RESPONSIVE TRANSCRIPTION FACTOR ERF071-RELATED
Eucgr.I02155	EgMDH11	2082	2102	-	2.42e-07	GGTGGACGACGGCGGCGCCGT	PTHR31190:SF4 - ETHYLENE-RESPONSIVE TRANSCRIPTION FACTOR ERF071-RELATED
Eucgr.I02155	EgMDH11	2085	2105	-	7.94e-06	CTTGGTGGACGACGGCGGCGC	PTHR31190:SF4 - ETHYLENE-RESPONSIVE TRANSCRIPTION FACTOR ERF071-RELATED
Eucgr.I02155	EgMDH11	2251	2271	-	1.48e-07	GGGGGAGGAAGGCGGCGGCGT	PTHR31190:SF4 - ETHYLENE-RESPONSIVE TRANSCRIPTION FACTOR ERF071-RELATED
Eucgr.I02155	EgMDH11	2302	2322	-	4.89e-06	GGTCGGACCCGGCGGCGACGG	PTHR31190:SF4 - ETHYLENE-RESPONSIVE TRANSCRIPTION FACTOR ERF071-RELATED
Eucgr.I02155	EgMDH3	1975	1995	+	1.72e-06	aagaagcggcagcggcggcgg	PTHR31190:SF4 - ETHYLENE-RESPONSIVE TRANSCRIPTION FACTOR ERF071-RELATED
Eucgr.I02155	EgMDH3	1978	1998	+	1.22e-09	aagcggcagcggcggcggtgg	PTHR31190:SF4 - ETHYLENE-RESPONSIVE TRANSCRIPTION FACTOR ERF071-RELATED
Eucgr.I02155	EgMDH3	1981	2001	+	1.24e-06	cggcagcggcggcggtggcaa	PTHR31190:SF4 - ETHYLENE-RESPONSIVE TRANSCRIPTION FACTOR ERF071-RELATED
Eucgr.I02155	EgMDH3	2023	2043	+	1.64e-06	CTCTCcgatcggcggcggcga	PTHR31190:SF4 - ETHYLENE-RESPONSIVE TRANSCRIPTION FACTOR ERF071-RELATED
Eucgr.I02155	EgMDH3	2069	2089	-	3.11e-06	GAGCTGAATCCGCGGCGGAGA	PTHR31190:SF4 - ETHYLENE-RESPONSIVE TRANSCRIPTION FACTOR ERF071-RELATED
Eucgr.I02155	EgMDH1	2119	2139	-	3.91e-06	CGATCCCGCCGGCGGCGCCGA	PTHR31190:SF4 - ETHYLENE-RESPONSIVE TRANSCRIPTION FACTOR ERF071-RELATED
Eucgr.I02155	EgMDH1	2218	2238	-	4.51e-07	GGCCGACGTCGGCGGCGACGC	PTHR31190:SF4 - ETHYLENE-RESPONSIVE TRANSCRIPTION FACTOR ERF071-RELATED
Eucgr.I02155	EgMDH13	2328	2348	-	3.26e-06	AGCAGGTTCTGGCGGCGCCTG	PTHR31190:SF4 - ETHYLENE-RESPONSIVE TRANSCRIPTION FACTOR ERF071-RELATED
Eucgr.I02434	EgMDH8	2682	2692	-	7.64e-06	GCGTGATTAAC	PTHR31948:SF15 - ZINC-FINGER HOMEODOMAIN PROTEIN 5
Eucgr.I02463	EgMDH3	468	484	-	7.97e-06	AAAAAACAGACAAAAGC	PTHR10593:SF28 - C2H2 AND C2HC ZINC FINGER-CONTAINING PROTEIN
Eucgr.I02463	EgMDH13	1340	1356	-	7.49e-06	TTGAAAAAGACAAATGT	PTHR10593:SF28 - C2H2 AND C2HC ZINC FINGER-CONTAINING PROTEIN
Eucgr.I02463	EgMDH13	649	665	-	1.73e-06	CAGAAAAAGACAAATGC	PTHR10593:SF28 - C2H2 AND C2HC ZINC FINGER-CONTAINING PROTEIN
Eucgr.I02463	EgMDH13	931	947	-	9.74e-07	CAGAAAAAGACAAATGT	PTHR10593:SF28 - C2H2 AND C2HC ZINC FINGER-CONTAINING PROTEIN
Eucgr.I02464	EgMDH7	476	496	+	1.41e-06	taagcaataattgcaaaaata	PTHR24326:SF281 - HOMEOBOX-LEUCINE ZIPPER PROTEIN ATHB-21-RELATED
Eucgr.I02464	EgMDH14	490	510	+	1.41e-06	taagcaataattgcaaaaata	PTHR24326:SF281 - HOMEOBOX-LEUCINE ZIPPER PROTEIN ATHB-21-RELATED
Eucgr.I02464	EgMDH5	29	49	-	1.93e-06	ATAACAATAATTGAACGTTTG	PTHR24326:SF281 - HOMEOBOX-LEUCINE ZIPPER PROTEIN ATHB-21-RELATED
Eucgr.I02464	EgMDH12	373	393	+	1.41e-06	taagcaataattgcaaaaata	PTHR24326:SF281 - HOMEOBOX-LEUCINE ZIPPER PROTEIN ATHB-21-RELATED
Eucgr.J00019	EgMDH4	1145	1165	+	9.82e-06	tcaacttttttttatttcatg	PTHR31992:SF26 - DOF ZINC FINGER PROTEIN DOF2.4
Eucgr.J00019	EgMDH4	1954	1974	+	3.32e-06	ttcacttttttctcctcctct	PTHR31992:SF26 - DOF ZINC FINGER PROTEIN DOF2.4
Eucgr.J00019	EgMDH4	435	455	-	4.95e-06	TTTTCTTTTTAGCTACTTTTA	PTHR31992:SF26 - DOF ZINC FINGER PROTEIN DOF2.4
Eucgr.J00019	EgMDH4	442	462	-	6.94e-06	TTTTTTTTTTTCTTTTTAGCT	PTHR31992:SF26 - DOF ZINC FINGER PROTEIN DOF2.4
Eucgr.J00019	EgMDH4	445	465	-	3.99e-06	TCTTTTTTTTTTTTCTTTTTA	PTHR31992:SF26 - DOF ZINC FINGER PROTEIN DOF2.4
Eucgr.J00019	EgMDH4	446	466	-	5.12e-07	TTCTTTTTTTTTTTTCTTTTT	PTHR31992:SF26 - DOF ZINC FINGER PROTEIN DOF2.4
Eucgr.J00019	EgMDH4	447	467	-	8.03e-07	TTTCTTTTTTTTTTTTCTTTT	PTHR31992:SF26 - DOF ZINC FINGER PROTEIN DOF2.4
Eucgr.J00019	EgMDH4	448	468	-	1.99e-10	TTTTCTTTTTTTTTTTTCTTT	PTHR31992:SF26 - DOF ZINC FINGER PROTEIN DOF2.4
Eucgr.J00019	EgMDH4	449	469	-	5.7e-06	TTTTTCTTTTTTTTTTTTCTT	PTHR31992:SF26 - DOF ZINC FINGER PROTEIN DOF2.4
Eucgr.J00019	EgMDH4	452	472	-	7.02e-06	TCTTTTTTCTTTTTTTTTTTT	PTHR31992:SF26 - DOF ZINC FINGER PROTEIN DOF2.4
Eucgr.J00019	EgMDH4	453	473	-	5.97e-06	ATCTTTTTTCTTTTTTTTTTT	PTHR31992:SF26 - DOF ZINC FINGER PROTEIN DOF2.4
Eucgr.J00019	EgMDH4	454	474	-	1.45e-06	TATCTTTTTTCTTTTTTTTTT	PTHR31992:SF26 - DOF ZINC FINGER PROTEIN DOF2.4
Eucgr.J00019	EgMDH4	455	475	-	7.67e-10	TTATCTTTTTTCTTTTTTTTT	PTHR31992:SF26 - DOF ZINC FINGER PROTEIN DOF2.4
Eucgr.J00019	EgMDH4	456	476	-	1.64e-06	TTTATCTTTTTTCTTTTTTTT	PTHR31992:SF26 - DOF ZINC FINGER PROTEIN DOF2.4
Eucgr.J00019	EgMDH4	461	481	-	1.22e-06	TAATCTTTATCTTTTTTCTTT	PTHR31992:SF26 - DOF ZINC FINGER PROTEIN DOF2.4
Eucgr.J00019	EgMDH2	538	558	-	7.43e-06	GTAACTTTATTCTCTCTCTCT	PTHR31992:SF26 - DOF ZINC FINGER PROTEIN DOF2.4
Eucgr.J00019	EgMDH2	753	773	+	6.1e-08	ttttcttttttcctttttata	PTHR31992:SF26 - DOF ZINC FINGER PROTEIN DOF2.4
Eucgr.J00019	EgMDH2	98	118	-	5.83e-06	TTTTTTTTTTCCTTTTTCAAT	PTHR31992:SF26 - DOF ZINC FINGER PROTEIN DOF2.4
Eucgr.J00019	EgMDH6	1495	1515	+	3.99e-06	ttccctttttcgcatttcttt	PTHR31992:SF26 - DOF ZINC FINGER PROTEIN DOF2.4
Eucgr.J00019	EgMDH10	1726	1746	+	8.98e-08	gatcctttttttttttttttt	PTHR31992:SF26 - DOF ZINC FINGER PROTEIN DOF2.4
Eucgr.J00019	EgMDH10	1727	1747	+	3.66e-06	atccttttttttttttttttt	PTHR31992:SF26 - DOF ZINC FINGER PROTEIN DOF2.4
Eucgr.J00019	EgMDH10	1728	1748	+	4.13e-06	tcctttttttttttttttttg	PTHR31992:SF26 - DOF ZINC FINGER PROTEIN DOF2.4
Eucgr.J00019	EgMDH11	1061	1081	-	4.48e-07	TCTTCTTTTTTTTTTTTATAA	PTHR31992:SF26 - DOF ZINC FINGER PROTEIN DOF2.4
Eucgr.J00019	EgMDH11	1064	1084	-	8.89e-06	TTTTCTTCTTTTTTTTTTTTA	PTHR31992:SF26 - DOF ZINC FINGER PROTEIN DOF2.4
Eucgr.J00019	EgMDH8	1438	1458	-	2.97e-06	GTCGTTTTTTTTTTTTTCTTT	PTHR31992:SF26 - DOF ZINC FINGER PROTEIN DOF2.4
Eucgr.J00019	EgMDH3	1787	1807	+	2.02e-06	atttctttttttttttccatt	PTHR31992:SF26 - DOF ZINC FINGER PROTEIN DOF2.4
Eucgr.J00019	EgMDH3	825	845	-	9.61e-06	TTTTTTTTTTTTTTTTTAAAT	PTHR31992:SF26 - DOF ZINC FINGER PROTEIN DOF2.4
Eucgr.J00019	EgMDH3	826	846	-	5.97e-06	TTTTTTTTTTTTTTTTTTAAA	PTHR31992:SF26 - DOF ZINC FINGER PROTEIN DOF2.4
Eucgr.J00019	EgMDH3	827	847	-	7.16e-07	TTTTTTTTTTTTTTTTTTTAA	PTHR31992:SF26 - DOF ZINC FINGER PROTEIN DOF2.4
Eucgr.J00019	EgMDH3	828	848	-	6.67e-07	GTTTTTTTTTTTTTTTTTTTA	PTHR31992:SF26 - DOF ZINC FINGER PROTEIN DOF2.4
Eucgr.J00019	EgMDH1	1164	1184	+	1.51e-06	tctgcttttagtttttctttt	PTHR31992:SF26 - DOF ZINC FINGER PROTEIN DOF2.4
Eucgr.J00019	EgMDH1	1176	1196	+	6.21e-08	ttttcttttcaacttcttttt	PTHR31992:SF26 - DOF ZINC FINGER PROTEIN DOF2.4
Eucgr.J00019	EgMDH7	1574	1594	-	1.64e-06	TTTTCTTTTTTCTTTCTGGGT	PTHR31992:SF26 - DOF ZINC FINGER PROTEIN DOF2.4
Eucgr.J00019	EgMDH7	1580	1600	-	2.27e-08	TCCTCTTTTTCTTTTTTCTTT	PTHR31992:SF26 - DOF ZINC FINGER PROTEIN DOF2.4
Eucgr.J00019	EgMDH7	1582	1602	-	1.24e-06	TTTCCTCTTTTTCTTTTTTCT	PTHR31992:SF26 - DOF ZINC FINGER PROTEIN DOF2.4
Eucgr.J00019	EgMDH7	1588	1608	-	5.9e-06	CTTCTTTTTCCTCTTTTTCTT	PTHR31992:SF26 - DOF ZINC FINGER PROTEIN DOF2.4
Eucgr.J00019	EgMDH7	1589	1609	-	6.1e-08	TCTTCTTTTTCCTCTTTTTCT	PTHR31992:SF26 - DOF ZINC FINGER PROTEIN DOF2.4
Eucgr.J00019	EgMDH7	1598	1618	-	9.78e-08	TTTCCTTTTTCTTCTTTTTCC	PTHR31992:SF26 - DOF ZINC FINGER PROTEIN DOF2.4
Eucgr.J00019	EgMDH7	1599	1619	-	1.51e-06	TTTTCCTTTTTCTTCTTTTTC	PTHR31992:SF26 - DOF ZINC FINGER PROTEIN DOF2.4
Eucgr.J00019	EgMDH7	19	39	+	1.95e-06	tcaacttttctacttttgctt	PTHR31992:SF26 - DOF ZINC FINGER PROTEIN DOF2.4
Eucgr.J00019	EgMDH14	1587	1607	-	1.64e-06	TTTTCTTTTTTCTTTCTGGGT	PTHR31992:SF26 - DOF ZINC FINGER PROTEIN DOF2.4
Eucgr.J00019	EgMDH14	1593	1613	-	2.27e-08	TCCTCTTTTTCTTTTTTCTTT	PTHR31992:SF26 - DOF ZINC FINGER PROTEIN DOF2.4
Eucgr.J00019	EgMDH14	1595	1615	-	1.24e-06	TTTCCTCTTTTTCTTTTTTCT	PTHR31992:SF26 - DOF ZINC FINGER PROTEIN DOF2.4
Eucgr.J00019	EgMDH14	1601	1621	-	5.9e-06	CTTCTTTTTCCTCTTTTTCTT	PTHR31992:SF26 - DOF ZINC FINGER PROTEIN DOF2.4
Eucgr.J00019	EgMDH14	1602	1622	-	6.1e-08	TCTTCTTTTTCCTCTTTTTCT	PTHR31992:SF26 - DOF ZINC FINGER PROTEIN DOF2.4
Eucgr.J00019	EgMDH14	1611	1631	-	9.78e-08	TTTCCTTTTTCTTCTTTTTCC	PTHR31992:SF26 - DOF ZINC FINGER PROTEIN DOF2.4
Eucgr.J00019	EgMDH14	1612	1632	-	1.51e-06	TTTTCCTTTTTCTTCTTTTTC	PTHR31992:SF26 - DOF ZINC FINGER PROTEIN DOF2.4
Eucgr.J00019	EgMDH14	31	51	+	1.95e-06	tcaacttttctacttttgctt	PTHR31992:SF26 - DOF ZINC FINGER PROTEIN DOF2.4
Eucgr.J00019	EgMDH5	1413	1433	+	3.75e-06	catgttttttttttttttttt	PTHR31992:SF26 - DOF ZINC FINGER PROTEIN DOF2.4
Eucgr.J00019	EgMDH5	1414	1434	+	4.55e-06	atgtttttttttttttttttt	PTHR31992:SF26 - DOF ZINC FINGER PROTEIN DOF2.4
Eucgr.J00019	EgMDH5	1416	1436	+	1.51e-07	gtttttttttttttttttttt	PTHR31992:SF26 - DOF ZINC FINGER PROTEIN DOF2.4
Eucgr.J00019	EgMDH5	1417	1437	+	1.49e-07	tttttttttttttttttttta	PTHR31992:SF26 - DOF ZINC FINGER PROTEIN DOF2.4
Eucgr.J00019	EgMDH5	1418	1438	+	1.64e-07	tttttttttttttttttttat	PTHR31992:SF26 - DOF ZINC FINGER PROTEIN DOF2.4
Eucgr.J00019	EgMDH5	1419	1439	+	2.72e-06	ttttttttttttttttttatg	PTHR31992:SF26 - DOF ZINC FINGER PROTEIN DOF2.4
Eucgr.J00019	EgMDH5	1420	1440	+	8.89e-06	tttttttttttttttttatga	PTHR31992:SF26 - DOF ZINC FINGER PROTEIN DOF2.4
Eucgr.J00019	EgMDH5	1421	1441	+	6.18e-06	ttttttttttttttttatgat	PTHR31992:SF26 - DOF ZINC FINGER PROTEIN DOF2.4
Eucgr.J00019	EgMDH5	1529	1549	-	3.89e-06	TTATTTTTTCTTCCTTTTTTT	PTHR31992:SF26 - DOF ZINC FINGER PROTEIN DOF2.4
Eucgr.J00019	EgMDH5	1530	1550	-	5.37e-06	ATTATTTTTTCTTCCTTTTTT	PTHR31992:SF26 - DOF ZINC FINGER PROTEIN DOF2.4
Eucgr.J00019	EgMDH5	1640	1660	-	1.55e-06	TTTCCTTTTCCTCCTCCTTTT	PTHR31992:SF26 - DOF ZINC FINGER PROTEIN DOF2.4
Eucgr.J00019	EgMDH12	1593	1613	-	2.27e-08	TCCTCTTTTTCTTTTTTCTTT	PTHR31992:SF26 - DOF ZINC FINGER PROTEIN DOF2.4
Eucgr.J00019	EgMDH12	1595	1615	-	1.24e-06	TTTCCTCTTTTTCTTTTTTCT	PTHR31992:SF26 - DOF ZINC FINGER PROTEIN DOF2.4
Eucgr.J00019	EgMDH12	1601	1621	-	5.9e-06	CTTCTTTTTCCTCTTTTTCTT	PTHR31992:SF26 - DOF ZINC FINGER PROTEIN DOF2.4
Eucgr.J00019	EgMDH12	1602	1622	-	6.1e-08	TCTTCTTTTTCCTCTTTTTCT	PTHR31992:SF26 - DOF ZINC FINGER PROTEIN DOF2.4
Eucgr.J00019	EgMDH12	99	119	-	2.42e-07	TCTTCTTTTTTAATTTTTCTT	PTHR31992:SF26 - DOF ZINC FINGER PROTEIN DOF2.4
Eucgr.J00107	EgMDH10	2589	2600	-	8.82e-06	AGCGTTGACCTC	PTHR31282:SF1 - WRKY TRANSCRIPTION FACTOR 38-RELATED
Eucgr.J00939	EgMDH2	1323	1342	-	7.16e-06	CAAATTTTTGTTTTCTTGTT	PTHR10593:SF42 - ZINC FINGER PROTEIN JACKDAW
Eucgr.J00939	EgMDH3	465	484	+	8.29e-06	gatgcttttgtctgtttttt	PTHR10593:SF42 - ZINC FINGER PROTEIN JACKDAW
Eucgr.J00939	EgMDH13	1337	1356	+	9.98e-06	aacacatttgtctttttcaa	PTHR10593:SF42 - ZINC FINGER PROTEIN JACKDAW
Eucgr.J00939	EgMDH13	646	665	+	8.11e-07	catgcatttgtctttttctg	PTHR10593:SF42 - ZINC FINGER PROTEIN JACKDAW
Eucgr.J00939	EgMDH13	928	947	+	8.69e-07	cacacatttgtctttttctg	PTHR10593:SF42 - ZINC FINGER PROTEIN JACKDAW
Eucgr.J01041	EgMDH5	712	722	+	8.59e-06	tagtgaaggta	PF13912 - C2H2-type zinc finger (zf-C2H2_6)
Eucgr.J02113	EgMDH10	2716	2725	-	4.55e-06	TCCTCGTACG	PTHR32467:SF29 - ETHYLENE-RESPONSIVE TRANSCRIPTION FACTOR RAP2-7
Eucgr.J02279	EgMDH6	1204	1216	+	1.71e-06	tttacctaacttt	PTHR10641:SF509 - MYB TRANSCRIPTION FACTOR
Eucgr.J02429	EgMDH6	876	886	-	8.26e-06	TCAGTCATTTA	PTHR24326:SF123 - PROTEIN WUSCHEL
Eucgr.J02851	EgMDH3	467	484	-	6.24e-06	AAAAAACAGACAAAAGCA	PTHR10593//PTHR10593:SF49 - SERINE/THREONINE-PROTEIN KINASE RIO
Eucgr.J02851	EgMDH13	648	665	-	7.86e-07	CAGAAAAAGACAAATGCA	PTHR10593//PTHR10593:SF49 - SERINE/THREONINE-PROTEIN KINASE RIO
Eucgr.J02851	EgMDH13	930	947	-	7.62e-07	CAGAAAAAGACAAATGTG	PTHR10593//PTHR10593:SF49 - SERINE/THREONINE-PROTEIN KINASE RIO
Eucgr.J02884	EgMDH4	1140	1160	-	5.64e-06	AATAAAAAAAAGTTGAAGACC	PF02701 - Dof domain, zinc finger (zf-Dof)
Eucgr.J02884	EgMDH4	440	460	+	6.45e-06	gtagctaaaaagaaaaaaaaa	PF02701 - Dof domain, zinc finger (zf-Dof)
Eucgr.J02884	EgMDH4	453	473	+	3.92e-08	aaaaaaaaaaagaaaaaagat	PF02701 - Dof domain, zinc finger (zf-Dof)
Eucgr.J02884	EgMDH4	460	480	+	2.35e-06	aaaagaaaaaagataaagatt	PF02701 - Dof domain, zinc finger (zf-Dof)
Eucgr.J02884	EgMDH2	525	545	+	9.82e-06	gggaaaaaaaagaagagagag	PF02701 - Dof domain, zinc finger (zf-Dof)
Eucgr.J02884	EgMDH2	748	768	-	8.77e-06	AAAGGAAAAAAGAAAATTGCA	PF02701 - Dof domain, zinc finger (zf-Dof)
Eucgr.J02884	EgMDH2	96	116	+	4.91e-07	tgattgaaaaaggaaaaaaaa	PF02701 - Dof domain, zinc finger (zf-Dof)
Eucgr.J02884	EgMDH11	1066	1086	+	9.35e-08	aaaaaaaaaaagaagaaaatt	PF02701 - Dof domain, zinc finger (zf-Dof)
Eucgr.J02884	EgMDH8	1746	1766	-	2.06e-06	TTAAAGAAAAAGGAGGAGGAA	PF02701 - Dof domain, zinc finger (zf-Dof)
Eucgr.J02884	EgMDH3	1782	1802	-	3.65e-07	AAAAAAAAAAAGAAATTAAAA	PF02701 - Dof domain, zinc finger (zf-Dof)
Eucgr.J02884	EgMDH1	1159	1179	-	3.89e-06	AAAAACTAAAAGCAGAAGTTA	PF02701 - Dof domain, zinc finger (zf-Dof)
Eucgr.J02884	EgMDH7	14	34	-	9.28e-06	AAAGTAGAAAAGTTGAAGGGA	PF02701 - Dof domain, zinc finger (zf-Dof)
Eucgr.J02884	EgMDH7	1579	1599	+	5.1e-07	gaaagaaaaaagaaaaagagg	PF02701 - Dof domain, zinc finger (zf-Dof)
Eucgr.J02884	EgMDH7	1585	1605	+	2.33e-08	aaaaagaaaaagaggaaaaag	PF02701 - Dof domain, zinc finger (zf-Dof)
Eucgr.J02884	EgMDH7	1594	1614	+	2.93e-08	aagaggaaaaagaagaaaaag	PF02701 - Dof domain, zinc finger (zf-Dof)
Eucgr.J02884	EgMDH7	1603	1623	+	9.35e-08	aagaagaaaaaggaaaacgaa	PF02701 - Dof domain, zinc finger (zf-Dof)
Eucgr.J02884	EgMDH7	22	42	-	4.41e-06	GCAAAGCAAAAGTAGAAAAGT	PF02701 - Dof domain, zinc finger (zf-Dof)
Eucgr.J02884	EgMDH14	1592	1612	+	5.1e-07	gaaagaaaaaagaaaaagagg	PF02701 - Dof domain, zinc finger (zf-Dof)
Eucgr.J02884	EgMDH14	1598	1618	+	2.33e-08	aaaaagaaaaagaggaaaaag	PF02701 - Dof domain, zinc finger (zf-Dof)
Eucgr.J02884	EgMDH14	1607	1627	+	2.93e-08	aagaggaaaaagaagaaaaag	PF02701 - Dof domain, zinc finger (zf-Dof)
Eucgr.J02884	EgMDH14	1616	1636	+	9.35e-08	aagaagaaaaaggaaaacgaa	PF02701 - Dof domain, zinc finger (zf-Dof)
Eucgr.J02884	EgMDH14	26	46	-	9.28e-06	AAAGTAGAAAAGTTGAAGGGA	PF02701 - Dof domain, zinc finger (zf-Dof)
Eucgr.J02884	EgMDH14	34	54	-	4.41e-06	GCAAAGCAAAAGTAGAAAAGT	PF02701 - Dof domain, zinc finger (zf-Dof)
Eucgr.J02884	EgMDH5	1525	1545	+	3.11e-07	ggaaaaaaaaaggaagaaaaa	PF02701 - Dof domain, zinc finger (zf-Dof)
Eucgr.J02884	EgMDH5	1526	1546	+	5.3e-06	gaaaaaaaaaggaagaaaaaa	PF02701 - Dof domain, zinc finger (zf-Dof)
Eucgr.J02884	EgMDH5	1633	1653	+	8.2e-07	agaaaaaaaaaggaggaggaa	PF02701 - Dof domain, zinc finger (zf-Dof)
Eucgr.J02884	EgMDH12	104	124	+	2.6e-06	aaattaaaaaagaagatagaa	PF02701 - Dof domain, zinc finger (zf-Dof)
Eucgr.J02884	EgMDH12	1592	1612	+	5.41e-07	caaagaaaaaagaaaaagagg	PF02701 - Dof domain, zinc finger (zf-Dof)
Eucgr.J02884	EgMDH12	1598	1618	+	2.33e-08	aaaaagaaaaagaggaaaaag	PF02701 - Dof domain, zinc finger (zf-Dof)
Eucgr.J02884	EgMDH12	1607	1627	+	9.33e-07	aagaggaaaaagaagagaaga	PF02701 - Dof domain, zinc finger (zf-Dof)
Eucgr.J02884	EgMDH12	783	803	+	2.47e-06	aaaataaaaaagaaatgaaaa	PF02701 - Dof domain, zinc finger (zf-Dof)
Eucgr.J03166	EgMDH10	2444	2462	+	5.53e-06	CGCCATCCTCATGGTCGTC	PTHR10071:SF167 - GATA TRANSCRIPTION FACTOR 24-RELATED
Eucgr.J03166	EgMDH7	2180	2198	-	1.56e-06	GATGTTCATCAACATCACC	PTHR10071:SF167 - GATA TRANSCRIPTION FACTOR 24-RELATED
Eucgr.J03166	EgMDH14	2180	2198	-	8.87e-07	GATCTTCATCAACATCGCC	PTHR10071:SF167 - GATA TRANSCRIPTION FACTOR 24-RELATED
Eucgr.K00122	EgMDH2	1488	1502	+	7.4e-07	aatttggataatatt	PTHR12374//PTHR12374:SF19 - TRANSCRIPTIONAL ADAPTOR 2 ADA2 -RELATED
Eucgr.K00126	EgMDH9	1208	1222	+	6.78e-06	cttgcgacggcggtg	PF00847 - AP2 domain (AP2)
Eucgr.K00126	EgMDH2	1998	2012	+	5.48e-06	gcaATGGCGGTGGCA	PF00847 - AP2 domain (AP2)
Eucgr.K00126	EgMDH10	1974	1988	-	6.53e-06	GGGACGGCGGAGGCA	PF00847 - AP2 domain (AP2)
Eucgr.K00126	EgMDH10	2333	2347	-	8.1e-06	GCGCCGGCGGTGACG	PF00847 - AP2 domain (AP2)
Eucgr.K00126	EgMDH10	2944	2958	+	2.04e-06	GCCGTGGCGGCGTCG	PF00847 - AP2 domain (AP2)
Eucgr.K00126	EgMDH11	2083	2097	-	8.94e-08	ACGACGGCGGCGCCG	PF00847 - AP2 domain (AP2)
Eucgr.K00126	EgMDH11	2086	2100	-	6.57e-06	TGGACGACGGCGGCG	PF00847 - AP2 domain (AP2)
Eucgr.K00126	EgMDH11	2252	2266	-	1.59e-06	AGGAAGGCGGCGGCG	PF00847 - AP2 domain (AP2)
Eucgr.K00126	EgMDH11	2297	2311	-	6.68e-06	GCGGCGACGGCGTAG	PF00847 - AP2 domain (AP2)
Eucgr.K00126	EgMDH11	2303	2317	-	3.11e-06	GACCCGGCGGCGACG	PF00847 - AP2 domain (AP2)
Eucgr.K00126	EgMDH11	2330	2344	-	8.1e-06	GCGCCGGCGGTGACG	PF00847 - AP2 domain (AP2)
Eucgr.K00126	EgMDH8	2690	2704	-	6.57e-06	GTGGCGACGGTGGCG	PF00847 - AP2 domain (AP2)
Eucgr.K00126	EgMDH3	1983	1997	+	8.02e-09	gcagcggcggcggtg	PF00847 - AP2 domain (AP2)
Eucgr.K00126	EgMDH3	1986	2000	+	8.36e-07	gcggcggcggtggca	PF00847 - AP2 domain (AP2)
Eucgr.K00126	EgMDH3	2028	2042	+	2.63e-06	cgatcggcggcggcg	PF00847 - AP2 domain (AP2)
Eucgr.K00126	EgMDH3	2031	2045	+	5.01e-07	tcggcggcggcgagg	PF00847 - AP2 domain (AP2)
Eucgr.K00126	EgMDH1	2120	2134	-	9.12e-07	CCGCCGGCGGCGCCG	PF00847 - AP2 domain (AP2)
Eucgr.K00126	EgMDH1	2219	2233	-	1.01e-06	ACGTCGGCGGCGACG	PF00847 - AP2 domain (AP2)
Eucgr.K00126	EgMDH13	2329	2343	-	4.12e-06	GTTCTGGCGGCGCCT	PF00847 - AP2 domain (AP2)
Eucgr.K00555	EgMDH2	1620	1634	+	9.46e-06	cgcaccaaccatcgt	PTHR10641:SF465 - MYB TRANSCRIPTION FACTOR
Eucgr.K00555	EgMDH5	227	241	-	1.21e-06	TCCACCAACCAACGA	PTHR10641:SF465 - MYB TRANSCRIPTION FACTOR
Eucgr.K01476	EgMDH9	1554	1567	+	7.62e-06	agacgaatcttctt	PTHR31499:SF4 - MYB FAMILY TRANSCRIPTION FACTOR-RELATED
Eucgr.K01542	EgMDH8	1947	1961	-	4.13e-06	ATATATAACGGTCCT	PTHR10641:SF473 - MYB TRANSCRIPTION FACTOR
Eucgr.K01542	EgMDH12	90	104	-	9.32e-06	TTTCTTAACGGTTTT	PTHR10641:SF473 - MYB TRANSCRIPTION FACTOR
Eucgr.K01545	EgMDH7	2049	2067	+	5.26e-06	CACCTTCACCCACCTAATT	PTHR10641:SF641 - MYB FAMILY TRANSCRIPTION FACTOR
Eucgr.K01545	EgMDH14	2049	2067	+	5.26e-06	CACCTTCACCCACCTAATT	PTHR10641:SF641 - MYB FAMILY TRANSCRIPTION FACTOR
Eucgr.K01545	EgMDH13	2922	2940	-	6.56e-06	CAGCTTCAACCAACTTCTG	PTHR10641:SF641 - MYB FAMILY TRANSCRIPTION FACTOR
Eucgr.K01545	EgMDH5	2049	2067	+	5.26e-06	CACCTTCACCCACCTAATT	PTHR10641:SF641 - MYB FAMILY TRANSCRIPTION FACTOR
Eucgr.K01545	EgMDH12	2049	2067	+	5.26e-06	CACCTTCACCCACCTAATT	PTHR10641:SF641 - MYB FAMILY TRANSCRIPTION FACTOR
Eucgr.K02192	EgMDH5	315	333	+	4.59e-06	tgttgcccagtgggcatta	PTHR36079:SF1 - PROTEIN LEAFY
Eucgr.K02192	EgMDH5	315	333	-	4.59e-06	TAATGCCCACTGGGCAACA	PTHR36079:SF1 - PROTEIN LEAFY
Eucgr.K02763	EgMDH2	1971	1982	-	7.77e-07	AAAAACAGAGCC	PTHR10694:SF38 - LYSINE-SPECIFIC DEMETHYLASE REF6
Eucgr.K02763	EgMDH6	813	824	-	9.79e-06	CGAAACAGAACA	PTHR10694:SF38 - LYSINE-SPECIFIC DEMETHYLASE REF6
Eucgr.K02763	EgMDH10	882	893	+	4.55e-06	caaaacagagaa	PTHR10694:SF38 - LYSINE-SPECIFIC DEMETHYLASE REF6
Eucgr.K02763	EgMDH1	2648	2659	-	8.45e-06	GAAAACAGAGGG	PTHR10694:SF38 - LYSINE-SPECIFIC DEMETHYLASE REF6
Eucgr.K02763	EgMDH7	933	944	-	6.37e-07	CAAAACAGAGCA	PTHR10694:SF38 - LYSINE-SPECIFIC DEMETHYLASE REF6
Eucgr.K02763	EgMDH12	1065	1076	-	6.37e-07	CAAAACAGAGCA	PTHR10694:SF38 - LYSINE-SPECIFIC DEMETHYLASE REF6
Eucgr.K02809	EgMDH2	1991	2011	-	9.4e-06	GCCACCGCCATTGCAGCAGAG	PTHR31301:SF25 - PROTEIN LATERAL ORGAN BOUNDARIES
Eucgr.K02809	EgMDH10	1953	1973	+	4.7e-06	cgcaccaccgctgccaccgcc	PTHR31301:SF25 - PROTEIN LATERAL ORGAN BOUNDARIES
Eucgr.K02809	EgMDH10	1956	1976	+	3.74e-08	accaccgctgccaccgcctgc	PTHR31301:SF25 - PROTEIN LATERAL ORGAN BOUNDARIES
Eucgr.K02809	EgMDH10	2016	2036	+	4.38e-06	TCCGCCTCATCCCTCGGCCCC	PTHR31301:SF25 - PROTEIN LATERAL ORGAN BOUNDARIES
Eucgr.K02809	EgMDH10	2118	2138	+	6.88e-06	ATCACCGTCGTCGGAGCCGGC	PTHR31301:SF25 - PROTEIN LATERAL ORGAN BOUNDARIES
Eucgr.K02809	EgMDH10	2289	2309	+	1.35e-06	tcctcctccgactaTGCCGTC	PTHR31301:SF25 - PROTEIN LATERAL ORGAN BOUNDARIES
Eucgr.K02809	EgMDH10	2292	2312	+	5.79e-06	tcctccgactaTGCCGTCACC	PTHR31301:SF25 - PROTEIN LATERAL ORGAN BOUNDARIES
Eucgr.K02809	EgMDH10	2328	2348	+	1.15e-06	ATTGTCGTCACCGCCGGCGCC	PTHR31301:SF25 - PROTEIN LATERAL ORGAN BOUNDARIES
Eucgr.K02809	EgMDH10	2842	2862	+	5.31e-06	TCCTCCGCGATCAGCGCAGGA	PTHR31301:SF25 - PROTEIN LATERAL ORGAN BOUNDARIES
Eucgr.K02809	EgMDH11	2022	2042	+	4.74e-06	TCCTCCCTCGGCCCCGGCGGC	PTHR31301:SF25 - PROTEIN LATERAL ORGAN BOUNDARIES
Eucgr.K02809	EgMDH11	2286	2306	+	5.35e-08	GCCTCCGTCGACTACGCCGTC	PTHR31301:SF25 - PROTEIN LATERAL ORGAN BOUNDARIES
Eucgr.K02809	EgMDH11	2289	2309	+	2.12e-06	TCCGTCGACTACGCCGTCGCC	PTHR31301:SF25 - PROTEIN LATERAL ORGAN BOUNDARIES
Eucgr.K02809	EgMDH11	2295	2315	+	1.24e-06	GACTACGCCGTCGCCGCCGGG	PTHR31301:SF25 - PROTEIN LATERAL ORGAN BOUNDARIES
Eucgr.K02809	EgMDH11	2298	2318	+	1.57e-06	TACGCCGTCGCCGCCGGGTCC	PTHR31301:SF25 - PROTEIN LATERAL ORGAN BOUNDARIES
Eucgr.K02809	EgMDH11	2322	2342	+	4.01e-06	CTCTGCATCGTCACCGCCGGC	PTHR31301:SF25 - PROTEIN LATERAL ORGAN BOUNDARIES
Eucgr.K02809	EgMDH11	2325	2345	+	2.37e-06	TGCATCGTCACCGCCGGCGCG	PTHR31301:SF25 - PROTEIN LATERAL ORGAN BOUNDARIES
Eucgr.K02809	EgMDH11	2839	2859	-	6.05e-06	TCCTCCTCTGGTCCCGGAGCA	PTHR31301:SF25 - PROTEIN LATERAL ORGAN BOUNDARIES
Eucgr.K02809	EgMDH8	2688	2708	+	9.81e-06	CACGCCACCGTCGCCACCAGC	PTHR31301:SF25 - PROTEIN LATERAL ORGAN BOUNDARIES
Eucgr.K02809	EgMDH3	1973	1993	-	7.88e-06	GCCGCCGCTGCCGCTTCTTCT	PTHR31301:SF25 - PROTEIN LATERAL ORGAN BOUNDARIES
Eucgr.K02809	EgMDH3	1976	1996	-	2.21e-08	ACCGCCGCCGCTGCCGCTTCT	PTHR31301:SF25 - PROTEIN LATERAL ORGAN BOUNDARIES
Eucgr.K02809	EgMDH3	1979	1999	-	5.71e-09	GCCACCGCCGCCGCTGCCGCT	PTHR31301:SF25 - PROTEIN LATERAL ORGAN BOUNDARIES
Eucgr.K02809	EgMDH3	1982	2002	-	1.46e-07	ATTGCCACCGCCGCCGCTGCC	PTHR31301:SF25 - PROTEIN LATERAL ORGAN BOUNDARIES
Eucgr.K02809	EgMDH3	2033	2053	-	7.24e-06	GGAGCCGACCTCGCCGCCGCC	PTHR31301:SF25 - PROTEIN LATERAL ORGAN BOUNDARIES
Eucgr.K02809	EgMDH3	2059	2079	+	2.57e-06	GCTCGCACCTTCTCCGCCGCG	PTHR31301:SF25 - PROTEIN LATERAL ORGAN BOUNDARIES
Eucgr.K02809	EgMDH3	2205	2225	+	3.11e-07	ATCGCCGGCACTCCCGGCGTC	PTHR31301:SF25 - PROTEIN LATERAL ORGAN BOUNDARIES
Eucgr.K02809	EgMDH1	2056	2076	+	4.15e-06	GGCCGCACCTCCTCCGCCGGG	PTHR31301:SF25 - PROTEIN LATERAL ORGAN BOUNDARIES
Eucgr.K02809	EgMDH1	2202	2222	+	3.11e-07	ATCGCCGGCACTCCCGGCGTC	PTHR31301:SF25 - PROTEIN LATERAL ORGAN BOUNDARIES
Eucgr.K02809	EgMDH1	2211	2231	+	4.67e-07	ACTCCCGGCGTCGCCGCCGAC	PTHR31301:SF25 - PROTEIN LATERAL ORGAN BOUNDARIES
Eucgr.K02809	EgMDH1	2214	2234	+	6.46e-07	CCCGGCGTCGCCGCCGACGTC	PTHR31301:SF25 - PROTEIN LATERAL ORGAN BOUNDARIES
Eucgr.K02809	EgMDH1	2217	2237	+	3.8e-06	GGCGTCGCCGCCGACGTCGGC	PTHR31301:SF25 - PROTEIN LATERAL ORGAN BOUNDARIES
Eucgr.K02809	EgMDH5	1691	1711	-	7.55e-06	TCCTCCACCGTCTCCACTTCA	PTHR31301:SF25 - PROTEIN LATERAL ORGAN BOUNDARIES
Eucgr.K02841	EgMDH4	1143	1163	-	4.14e-06	TGAAATAAAAAAAAGTTGAAG	PF02701 - Dof domain, zinc finger (zf-Dof)
Eucgr.K02841	EgMDH4	1404	1424	+	6.66e-06	cgggaaatcaaaaagaaaaat	PF02701 - Dof domain, zinc finger (zf-Dof)
Eucgr.K02841	EgMDH4	1952	1972	-	7.98e-06	AGGAGGAGAAAAAAGTGAACT	PF02701 - Dof domain, zinc finger (zf-Dof)
Eucgr.K02841	EgMDH4	437	457	+	3.84e-06	aaagtagctaaaaagaaaaaa	PF02701 - Dof domain, zinc finger (zf-Dof)
Eucgr.K02841	EgMDH4	450	470	+	1.12e-08	agaaaaaaaaaaaagaaaaaa	PF02701 - Dof domain, zinc finger (zf-Dof)
Eucgr.K02841	EgMDH4	457	477	+	7.04e-08	aaaaaaagaaaaaagataaag	PF02701 - Dof domain, zinc finger (zf-Dof)
Eucgr.K02841	EgMDH9	780	800	+	9.52e-06	aagggcaaaaaaaaggcaaaa	PF02701 - Dof domain, zinc finger (zf-Dof)
Eucgr.K02841	EgMDH2	522	542	+	7.25e-06	aaggggaaaaaaaagaagaga	PF02701 - Dof domain, zinc finger (zf-Dof)
Eucgr.K02841	EgMDH2	751	771	-	2.13e-06	TAAAAAGGAAAAAAGAAAATT	PF02701 - Dof domain, zinc finger (zf-Dof)
Eucgr.K02841	EgMDH2	93	113	+	8.2e-06	tcatgattgaaaaaggaaaaa	PF02701 - Dof domain, zinc finger (zf-Dof)
Eucgr.K02841	EgMDH6	1493	1513	-	9.52e-06	AGAAATGCGAAAAAGGGAAGG	PF02701 - Dof domain, zinc finger (zf-Dof)
Eucgr.K02841	EgMDH10	1724	1744	-	1.01e-06	AAAAAAAAAAAAAAGGATCAA	PF02701 - Dof domain, zinc finger (zf-Dof)
Eucgr.K02841	EgMDH11	1063	1083	+	7.69e-08	ataaaaaaaaaaaagaagaaa	PF02701 - Dof domain, zinc finger (zf-Dof)
Eucgr.K02841	EgMDH1	1162	1182	-	5.16e-06	AAGAAAAACTAAAAGCAGAAG	PF02701 - Dof domain, zinc finger (zf-Dof)
Eucgr.K02841	EgMDH1	127	147	-	9.4e-06	CAAAAAAGGATAAAGGCACAA	PF02701 - Dof domain, zinc finger (zf-Dof)
Eucgr.K02841	EgMDH7	1576	1596	+	4.52e-06	ccagaaagaaaaaagaaaaag	PF02701 - Dof domain, zinc finger (zf-Dof)
Eucgr.K02841	EgMDH7	1582	1602	+	5.6e-08	agaaaaaagaaaaagaggaaa	PF02701 - Dof domain, zinc finger (zf-Dof)
Eucgr.K02841	EgMDH7	1591	1611	+	1.52e-08	aaaaagaggaaaaagaagaaa	PF02701 - Dof domain, zinc finger (zf-Dof)
Eucgr.K02841	EgMDH7	1600	1620	+	1.48e-08	aaaaagaagaaaaaggaaaac	PF02701 - Dof domain, zinc finger (zf-Dof)
Eucgr.K02841	EgMDH7	25	45	-	9.89e-07	GAAGCAAAGCAAAAGTAGAAA	PF02701 - Dof domain, zinc finger (zf-Dof)
Eucgr.K02841	EgMDH14	1589	1609	+	4.52e-06	ccagaaagaaaaaagaaaaag	PF02701 - Dof domain, zinc finger (zf-Dof)
Eucgr.K02841	EgMDH14	1595	1615	+	5.6e-08	agaaaaaagaaaaagaggaaa	PF02701 - Dof domain, zinc finger (zf-Dof)
Eucgr.K02841	EgMDH14	1604	1624	+	1.52e-08	aaaaagaggaaaaagaagaaa	PF02701 - Dof domain, zinc finger (zf-Dof)
Eucgr.K02841	EgMDH14	1613	1633	+	1.48e-08	aaaaagaagaaaaaggaaaac	PF02701 - Dof domain, zinc finger (zf-Dof)
Eucgr.K02841	EgMDH14	37	57	-	9.89e-07	GAAGCAAAGCAAAAGTAGAAA	PF02701 - Dof domain, zinc finger (zf-Dof)
Eucgr.K02841	EgMDH12	101	121	+	1.73e-06	gaaaaattaaaaaagaagata	PF02701 - Dof domain, zinc finger (zf-Dof)
Eucgr.K02841	EgMDH12	1595	1615	+	5.6e-08	agaaaaaagaaaaagaggaaa	PF02701 - Dof domain, zinc finger (zf-Dof)
Eucgr.K02841	EgMDH12	1604	1624	+	1.09e-07	aaaaagaggaaaaagaagaga	PF02701 - Dof domain, zinc finger (zf-Dof)
Eucgr.K02883	EgMDH7	2753	2773	-	9.44e-06	ACAACTTCTGTCCCGCCATTT	PTHR12081:SF46 - E2F TRANSCRIPTION FACTOR-LIKE E2FE
Eucgr.K02883	EgMDH14	2729	2749	-	9.44e-06	ACAACTTCTGTCCCGCCATTT	PTHR12081:SF46 - E2F TRANSCRIPTION FACTOR-LIKE E2FE
Eucgr.K02883	EgMDH5	2753	2773	-	9.44e-06	ACAACTTCTGTCCCGCCATTT	PTHR12081:SF46 - E2F TRANSCRIPTION FACTOR-LIKE E2FE
Eucgr.K02883	EgMDH12	2753	2773	-	9.44e-06	ACAACTTCTGTCCCGCCATTT	PTHR12081:SF46 - E2F TRANSCRIPTION FACTOR-LIKE E2FE
Eucgr.K02952	EgMDH2	1999	2015	-	2.59e-07	CTCTGCCACCGCCATTG	PTHR31241:SF2 - DEHYDRATION-RESPONSIVE ELEMENT-BINDING PROTEIN 2A-RELATED
Eucgr.K02952	EgMDH11	30	46	-	4.18e-06	CTCAAAAACCGACATCA	PTHR31241:SF2 - DEHYDRATION-RESPONSIVE ELEMENT-BINDING PROTEIN 2A-RELATED
Eucgr.K02966	EgMDH8	595	605	+	9.5e-06	gaaagaatgtt	) PF00249 - Myb-like DNA-binding domain (Myb_DNA-binding)
Eucgr.K02966	EgMDH14	2526	2536	+	1.1e-06	AAGAGAATGTT	) PF00249 - Myb-like DNA-binding domain (Myb_DNA-binding)
Eucgr.K03133	EgMDH8	430	444	+	6.68e-06	ctaagatgaccgttg	PTHR10641:SF492 - MYB-RELATED PROTEIN A
Eucgr.K03144	EgMDH4	1695	1709	+	6.15e-06	tctctttactttttt	PF02701 - Dof domain, zinc finger (zf-Dof)
Eucgr.K03144	EgMDH2	101	115	-	2.12e-07	TTTTTTTCCTTTTTC	PF02701 - Dof domain, zinc finger (zf-Dof)
Eucgr.K03144	EgMDH2	757	771	+	9.89e-07	cttttttccttttta	PF02701 - Dof domain, zinc finger (zf-Dof)
Eucgr.K03144	EgMDH10	1549	1563	-	7.87e-06	ATATATAACTTTTTG	PF02701 - Dof domain, zinc finger (zf-Dof)
Eucgr.K03144	EgMDH3	1057	1071	-	1.04e-06	TCTTTTAACTTTTTA	PF02701 - Dof domain, zinc finger (zf-Dof)
Eucgr.K03266	EgMDH10	1954	1981	+	3.77e-06	gcaccaccgctgccaccgcctgcctccg	PF00847 - AP2 domain (AP2)
Eucgr.K03266	EgMDH10	2935	2962	-	8.6e-07	CCCACGACGCCGCCACGGCCGAGCTGTG	PF00847 - AP2 domain (AP2)
Eucgr.K03266	EgMDH11	2079	2106	+	1.3e-06	GAGACGGCGCCGCCGTCGTCCACCAAGC	PF00847 - AP2 domain (AP2)
Eucgr.K03266	EgMDH11	2245	2272	+	7.27e-06	TCCAGCACGCCGCCGCCTTCCTCCCCCG	PF00847 - AP2 domain (AP2)
Eucgr.K03266	EgMDH11	2248	2275	+	3e-06	AGCACGCCGCCGCCTTCCTCCCCCGCAC	PF00847 - AP2 domain (AP2)
Eucgr.K03266	EgMDH11	2299	2326	+	1.89e-07	ACGCCGTCGCCGCCGGGTCCGACCTCTG	PF00847 - AP2 domain (AP2)
Eucgr.K03266	EgMDH3	1968	1995	-	5.51e-06	CCGCCGCCGCTGCCGCTTCTTCTTCTAG	PF00847 - AP2 domain (AP2)
Eucgr.K03266	EgMDH3	1971	1998	-	3.16e-06	CCACCGCCGCCGCTGCCGCTTCTTCTTC	PF00847 - AP2 domain (AP2)
Eucgr.K03266	EgMDH3	1974	2001	-	2.13e-10	TTGCCACCGCCGCCGCTGCCGCTTCTTC	PF00847 - AP2 domain (AP2)
Eucgr.K03266	EgMDH3	2022	2049	-	2.24e-06	CCGACCTCGCCGCCGCCGATCGGAGAGA	PF00847 - AP2 domain (AP2)
Eucgr.K03266	EgMDH1	2116	2143	+	5.88e-06	TGCTCGGCGCCGCCGGCGGGATCGGCCA	PF00847 - AP2 domain (AP2)
Eucgr.K03266	EgMDH1	2212	2239	+	9.29e-06	CTCCCGGCGTCGCCGCCGACGTCGGCCA	PF00847 - AP2 domain (AP2)
Eucgr.K03266	EgMDH1	2215	2242	+	1.89e-07	CCGGCGTCGCCGCCGACGTCGGCCACAT	PF00847 - AP2 domain (AP2)
Eucgr.K03266	EgMDH13	2325	2352	+	7.76e-06	GATCAGGCGCCGCCAGAACCTGCTGAAC	PF00847 - AP2 domain (AP2)
Eucgr.K03284	EgMDH3	2207	2221	-	2.3e-06	CCGGGAGTGCCGGCG	PTHR31529:SF10 - LOB DOMAIN-CONTAINING PROTEIN 16
Eucgr.K03284	EgMDH1	2204	2218	-	2.3e-06	CCGGGAGTGCCGGCG	PTHR31529:SF10 - LOB DOMAIN-CONTAINING PROTEIN 16

## Sheet: Table S5
Table S5. STRING database protein interaction annotations of MDHs
Organism	Protein_id	Blast_AT_Name	Function_AT
EgMDHs in Eucalyptus grandis	A0A059C453	NAD-ME1	NAD-dependent malic enzyme 1
	EUGRSUZ_A01915	PPC3	PPC3 (phosphoenolpyruvate carboxylase 3) (Primary Symbol), ATPPC3 (PHOSPHOENOLPYRUVATE CARBOXYLASE 3)
	EUGRSUZ_B02235	KT1	KT1 (potassium transporter 1) (Primary Symbol), KUP1 (POTASSIUM UPTAKE TRANSPORTER 1), ATKT1P, ATKT1 (POTASSIUM TRANSPORTER 1), ATKUP1
	EUGRSUZ_C00609	NADP-ME3	NADP-ME3 (NADP-malic enzyme 3) (Primary Symbol), ATNADP-ME3 (Arabidopsis thaliana NADP-malic enzyme 3)
	EUGRSUZ_C01003	NADP-ME1	NADP-ME1 (NADP-malic enzyme 1) (Primary Symbol), ATNADP-ME1 (Arabidopsis thaliana NADP-malic enzyme 1)
	EUGRSUZ_C01585	ASP3	ASP3 (ASPARTATE AMINOTRANSFERASE 3) (Primary Symbol), YLS4 (YELLOW-LEAF-SPECIFIC GENE 4)
	EUGRSUZ_C01588	YLS4	ASP3 (ASPARTATE AMINOTRANSFERASE 3) (Primary Symbol), YLS4 (YELLOW-LEAF-SPECIFIC GENE 4)
	EUGRSUZ_C02720	ASP5	ASP5 (ASPARTATE AMINOTRANSFERASE 5) (Primary Symbol), AAT3 (ASPARTATE AMINOTRANSFERASE DEFICIENT 3), ATAAT1
	EUGRSUZ_C02894	ASP2	ASP2 (ASPARTATE AMINOTRANSFERASE 2) (Primary Symbol), AAT2 (ASPARTATE AMINOTRANSFERASE 2)
	EUGRSUZ_D02251	NAD-ME2	NAD-ME2 (NAD-dependent malic enzyme 2) (Primary Symbol)
	EUGRSUZ_F01229	PPC1	PPC1 (phosphoenolpyruvate carboxylase 1) (Primary Symbol)
	EUGRSUZ_F03074	NADP-ME4	NADP-ME4 (NADP-malic enzyme 4) (Primary Symbol)
	EUGRSUZ_H02295	IAMH2	Indole-3-acetamide (IAM) hydrolase gene required for the auxin effects of IAM.
	EUGRSUZ_H04045	ACLB-2	ACLB-2 (ATP CITRATE LYASE SUBUNIT B 2) (Primary Symbol)
	EUGRSUZ_I00055	ACLB-1	ACLB-1 (ATP-CITRATE LYASE B-1) (Primary Symbol), RES4, ACLB1
	EUGRSUZ_I00628	PCK1	PCK1 (PHOSPHOENOLPYRUVATE CARBOXYKINASE 1) (Primary Symbol), PEPCK (PHOSPHOENOLPYRUVATE CARBOXYKINASE)
	EUGRSUZ_J02207	FDH	FDH (FORMATE DEHYDROGENASE) (Primary Symbol), ATFDH1
	EUGRSUZ_J02208	FDH-1	FDH (FORMATE DEHYDROGENASE) (Primary Symbol), ATFDH1
	EUGRSUZ_J02209	FDH-2	FDH (FORMATE DEHYDROGENASE) (Primary Symbol), ATFDH1
	EUGRSUZ_J02940	NADP-ME2	NADP-ME2 (NADP-malic enzyme 2) (Primary Symbol), ATNADP-ME2 (Arabidopsis thaliana NADP-malic enzyme 2)
PtMDHs in Populus trichocarpa	B9HFR1_POPTR	PCK1	PCK1 (PHOSPHOENOLPYRUVATE CARBOXYKINASE 1) (Primary Symbol), PEPCK (PHOSPHOENOLPYRUVATE CARBOXYKINASE)
	B9HIN6_POPTR	ALCB-2	ACLB-2 (ATP CITRATE LYASE SUBUNIT B 2) (Primary Symbol)
	B9GGM4_POPTR	NADP-ME4	NADP-ME4 (NADP-malic enzyme 4) (Primary Symbol), ATNADP-ME4 (Arabidopsis thaliana NADP-malic enzyme 4)
	A0A2K2A9S5	ACLA-3	ACLA-3 (ATP-CITRATE LYASE A-3) (Primary Symbol)
	B9I6M7_POPTR	ACLA-2	ACLA-2 (ATP-CITRATE LYASE A-2) (Primary Symbol), ACLA2
	A0A2K1XKF5	MLS	MLS (MALATE SYNTHASE) (Primary Symbol)
	B9GHH8_POPTR	DDI1	DDI1 (DNA-damage inducible 1) (Primary Symbol)
	B9I1U5_POPTR	PPC3	PPC3 (phosphoenolpyruvate carboxylase 3) (Primary Symbol), ATPPC3 (PHOSPHOENOLPYRUVATE CARBOXYLASE 3)
	B9HLS7_POPTR	ACLA-1	ACLA-1 (ATP-CITRATE LYASE A-1) (Primary Symbol)
	A0A2K2A764	NADP-ME3	NADP-ME3 (NADP-malic enzyme 3) (Primary Symbol), ATNADP-ME3 (Arabidopsis thaliana NADP-malic enzyme 3)
	B9GN56_POPTR	PCK1-1	PCK1-1 (PHOSPHOENOLPYRUVATE CARBOXYKINASE 1) (Primary Symbol), PEPCK (PHOSPHOENOLPYRUVATE CARBOXYKINASE)
	A0A2K1WVT8	NADP-ME3-1	NADP-ME3 (NADP-malic enzyme 3) (Primary Symbol), ATNADP-ME3 (Arabidopsis thaliana NADP-malic enzyme 3)
	A0A2K2AGU2	IAMH2	IAMH2 (IAMHYDROLASE12) (Primary Symbol)
	A9PEQ6_POPTR	FDH	FDH
	A0A2K2BMI6	FDH-1	FDH-1
	U5FXB8_POPTR	DDI1-1	DDI1 (DNA-damage inducible 1) (Primary Symbol)
	U5GXD4_POPTR	PPC2	PPC2 (phosphoenolpyruvate carboxylase 2) (Primary Symbol), ATPPC2 (PHOSPHOENOLPYRUVATE CARBOXYLASE 2)
	A0A2K2BMA9	PPC1	PPC1 (phosphoenolpyruvate carboxylase 1) (Primary Symbol)
	U5GBV1_POPTR	NLP3	NLP3 (NITRILASE-LIKE PROTEIN 3) (Primary Symbol)
	A0A2K1Z4A2	KT1	KT1 (potassium transporter 1) (Primary Symbol), KUP1 (POTASSIUM UPTAKE TRANSPORTER 1), ATKT1P, ATKT1 (POTASSIUM TRANSPORTER 1), ATKUP1
AtMDHs in Arabidopsis thaliana	PCK2		CKA4 (CK2 ALPHA CP) (Primary Symbol), CPCK2, PCK2 (CASEIN KINASE 2)
	FDH1		FDH (FORMATE DEHYDROGENASE) (Primary Symbol), ATFDH1
	NLP3		NLP3 (NITRILASE-LIKE PROTEIN 3) (Primary Symbol)
	PCKA
	PPC4		PPC4 (phosphoenolpyruvate carboxylase 4) (Primary Symbol), ATPPC4 (phosphoenolpyruvate carboxylase 4)
	PPC2		PPC2 (phosphoenolpyruvate carboxylase 2) (Primary Symbol), ATPPC2 (PHOSPHOENOLPYRUVATE CARBOXYLASE 2)
	PPC1		PPC1 (phosphoenolpyruvate carboxylase 1) (Primary Symbol)
	PPC3		PPC3 (phosphoenolpyruvate carboxylase 3) (Primary Symbol), ATPPC3 (PHOSPHOENOLPYRUVATE CARBOXYLASE 3)
	F19F18.40
	NADP-ME1		NADP-ME1 (NADP-malic enzyme 1) (Primary Symbol), ATNADP-ME1 (Arabidopsis thaliana NADP-malic enzyme 1)
	F19F18.50
	PURU1
	NADP-ME4		NADP-ME4 (NADP-malic enzyme 4) (Primary Symbol), ATNADP-ME4 (Arabidopsis thaliana NADP-malic enzyme 4)
	NADP-ME2		NADP-ME2 (NADP-malic enzyme 2) (Primary Symbol), ATNADP-ME2 (Arabidopsis thaliana NADP-malic enzyme 2)
	NADP-ME3		NADP-ME3 (NADP-malic enzyme 3) (Primary Symbol), ATNADP-ME3 (Arabidopsis thaliana NADP-malic enzyme 3)
	NAD-ME1		NAD-ME1 (NAD-dependent malic enzyme 1) (Primary Symbol)
	NAD-ME2		NAD-ME2 (NAD-dependent malic enzyme 2) (Primary Symbol)
	T6K21.140
	K19E1.4
	ASP4		PRP4KB (Pre-mRNA PROCESSING FACTOR 4 KINASE B) (Primary Symbol)
EgMDHs in Populus trichocarpa	B9HIN6_POPTR
	A0A2K2AGU2
	B9GP43_POPTR
	B9GPX3_POPTR
	A0A2K1XS69
	B9MVC4_POPTR
	A0A2K1XKF5
	B9HFR1_POPTR
	B9GN56_POPTR
	B9ILT5_POPTR
	B9GGM4_POPTR
	A0A2K2A764
	B9H920_POPTR
	A9PHH1_POPTR
	A0A2K2A7I4
	U5FXB8_POPTR
	B9GHH8_POPTR
	U5GBV1_POPTR
	A0A2K1Z4A2
EgMDHs in Arabidopsis thaliana	ASP2		ASP2 (ASPARTATE AMINOTRANSFERASE 2) (Primary Symbol), AAT2 (ASPARTATE AMINOTRANSFERASE 2)
	ASP3
	ASP4		PRP4KB (Pre-mRNA PROCESSING FACTOR 4 KINASE B) (Primary Symbol)
	F19F18.40
	F19F18.50
	FDH1		FDH (FORMATE DEHYDROGENASE) (Primary Symbol), ATFDH1
	NAD-ME1		NAD-ME1 (NAD-dependent malic enzyme 1) (Primary Symbol)
	NAD-ME2		NAD-ME2 (NAD-dependent malic enzyme 2) (Primary Symbol)
	NADP-ME1		NADP-ME1 (NADP-malic enzyme 1) (Primary Symbol), ATNADP-ME1 (Arabidopsis thaliana NADP-malic enzyme 1)
	NADP-ME2		NADP-ME2 (NADP-malic enzyme 2) (Primary Symbol), ATNADP-ME2 (Arabidopsis thaliana NADP-malic enzyme 2)
	NADP-ME3		NADP-ME3 (NADP-malic enzyme 3) (Primary Symbol), ATNADP-ME3 (Arabidopsis thaliana NADP-malic enzyme 3)
	NADP-ME4		NADP-ME4 (NADP-malic enzyme 4) (Primary Symbol), ATNADP-ME4 (Arabidopsis thaliana NADP-malic enzyme 4)
	PCK2		CKA4 (CK2 ALPHA CP) (Primary Symbol), CPCK2, PCK2 (CASEIN KINASE 2)
	PCKA
	PPC1		PPC1 (phosphoenolpyruvate carboxylase 1) (Primary Symbol)
	PPC2		PPC2 (phosphoenolpyruvate carboxylase 2) (Primary Symbol), ATPPC2 (PHOSPHOENOLPYRUVATE CARBOXYLASE 2)
	PPC3		PPC3 (phosphoenolpyruvate carboxylase 3) (Primary Symbol), ATPPC3 (PHOSPHOENOLPYRUVATE CARBOXYLASE 3)
	PPC4		PPC4 (phosphoenolpyruvate carboxylase 4) (Primary Symbol), ATPPC4 (phosphoenolpyruvate carboxylase 4)
	T6K21.140
	K19E1.4

## Sheet: Table S6
Table S6. Tissue-specific expression profiles of EgMDHs in different tissues of Eucalyptus grandis
Gene ID	seedling_tissueculture_30d_rep1.1	seedling_tissueculture_30d_rep3.1	root_tissueculture_30d_rep1.1	root_tissueculture_30d_rep2.1	stem_tissueculture_30d_rep1.1	stem_tissueculture_30d_rep2.1	stem_tissueculture_30d_rep3.1	leaf_tissueculture_30d_rep1.1	leaf_tissueculture_30d_rep2.1	leaf_tissueculture_30d_rep3.1	flower_3y_plant_rep1.1	flower_3y_plant_rep2.1	flower_3y_plant_rep3.1	lateral_branch_3y_plant_rep1.1	lateral_branch_3y_plant_rep1.2	stemapex_6month_rep1.1	stemapex_6_month_rep2.1	stemapex_6month_rep3.1	the_3rd_internode_6month_rep1.1	the_3rd_internode_6month_rep2.1	the_5th_internode_6month_rep1.1	the_5th_internode_6month_rep3.1	the_7th_internode_6month_rep1.1	the_7th_internode_6month_rep2.1	the_7th_internode_6month_rep3.1	the_9th_internode_6month_rep1.1	the_9th_internode_6month_rep2.1	the_9th_internode_6month_rep3.1	the_11th_internode_6month_rep1.1	the_11th_internode_6month_rep2.1	the_11th_internode_6month_rep3.1
EgMDH1	7286.49	6506.63	14865.1	20742.3	5782.26	5351.88	5447.96	6670.87	5907.14	6157.62	4982.83	5125.37	4955.95	5073.12	5159.76	3315.38	3290.83	3303.72	8782.14	5564.87	8895.83	6654.67	8356.49	5570.9	7076.61	8481.68	7832	8129.99	8448.79	9661.95	8454.21
EgMDH2	2051.35	2311.79	1753.56	4669.98	746.098	723.179	765.148	1912.96	1325.96	1581.54	2105.6	1910.44	2075.1	1363.99	1387.25	4234.57	4277.12	4225.9	7270.3	10961.5	7115.13	8156.86	7452.96	11570.2	9111.37	6002.33	7549.14	6428.93	5871.74	5561.18	5576.73
EgMDH3	3516.25	3252.2	6402.68	5635.74	3319.95	3515.5	3414.28	2989.16	2958.62	2932.24	1727.72	1825.89	1731.11	3513.3	3564.17	2121.96	1968.19	2025.81	5582.99	4161.91	6318.6	4990.7	5064.85	3963.66	4575.31	4760.85	4660.05	4557.08	4772.32	4655.56	4713.22
EgMDH4	20982.6	19236.8	32881.5	37747.5	17632.7	18911.9	18161.3	13263.4	15566.3	14270.6	8710.03	10081.6	9054.23	12593.7	12855.2	7256.65	7078.1	7125.69	22762.6	19724.5	23475.8	21811.6	26022.8	19585.1	22923.8	23396.9	27582.1	24479.6	25619.1	32000.5	27007.7
EgMDH5	11299.4	13026.7	3574.97	4813.88	4574.07	4410.15	4528.73	21160.9	17674.6	19060.7	3138.07	3318.6	3021.78	3619.58	3503.19	1828.66	1846.56	1826.46	4760.93	4826.24	4825.12	5192.61	5885.65	4902.2	5485.2	6027.7	6349.02	6047.51	5770.55	6667.7	5962.6
EgMDH6	3283.29	2911.59	7546.34	9537.21	2493.24	2681.27	2595.73	2584.14	2830.98	2669.45	1846.74	1929.56	1726.47	2355.98	2319.2	1394.69	1351.21	1398.43	3652.7	3246.26	4060.5	3562.7	3701.56	3425.15	3552.13	2754.75	3930.35	3166.21	3254.5	4213.97	3476.32
EgMDH7	30.7379	32.8655	21.516	18.608	14.0596	12.438	9.63001	81.0047	51.4223	65.4981	16.8607	10.0655	13.9082	18.6982	23.3749	10.8492	5.86208	7.49216	8.09911	13.1118	28.0827	17.0289	18.804	14.2024	14.2728	3.62372	17.4227	7.65896	13.6352	23.4563	18.7139
EgMDH8	88.1691	96.3558	68.6858	64.5077	91.8563	177.685	130.443	59.6408	145.084	107.832	11.9017	10.0655	3.70885	68.8882	69.1085	56.1168	41.7673	43.3242	222.726	241.476	261.68	276.112	244.452	252.093	231.04	209.451	248.017	222.11	128.458	299.832	174.663
EgMDH9	680.277	748.438	426.183	394.489	773.28	575.7	636.456	1407.35	965.087	1170.98	538.55	621.043	531.293	526.503	517.297	347.176	372.609	362.881	773.465	957.162	884.605	908.616	864.043	981.15	935.758	891.436	1022.81	930.564	1043.45	908.676	942.823
EgMDH10	202.223	123.993	627.275	118.471	10.3104	47.975	31.5164	72.9932	1.83651	39.1391	123.976	87.5701	99.2117	27.5553	32.5216	10.8492	15.388	15.9616	16.1982	17.4824	15.3178	17.0289	31.9668	22.4872	25.8694	133.353	10.2486	82.7168	99.7522	11.2182	73.0732
EgMDH11	681.086	477.297	2026.65	1858.94	510.834	656.547	595.31	202.957	232.319	240.426	312.418	417.719	316.179	5075.09	5051.02	727.648	797.61	764.852	1675.17	1128.71	1734.74	1311.23	2001.68	1300.7	1703.81	2830.13	1635.68	2342.88	1847.21	2076.39	1826.83
EgMDH12	5.66224	4.48167	5.79278	14.2661	4.68655	4.44213	4.37728	19.5835	12.8556	15.1764	4.95902	10.0655	6.49049	8.85706	6.09781	2.24467	1.8319	2.60597	0	2.1853	8.9354	2.43271	5.64119	4.73414	5.35228	2.89898	11.2735	8.42486	2.15292	5.09919	2.67341
EgMDH13	2.42667	3.73472	6.62032	0	4.68655	4.44213	5.25273	0.890161	2.75477	2.39627	1.98361	0	0.927212	0	0	1.87056	2.19828	2.60597	4.04956	2.1853	2.55297	2.43271	0	1.18353	0.892047	0.724744	0	0.765896	2.15292	0	1.78227
EgMDH14	4.04445	0	1.65508	3.7216	2.81193	0	0.875456	5.34097	3.67302	5.5913	0	0	0	1.96823	4.0652	0.748224	2.19828	0.977238	1.34985	3.27795	3.82946	6.08177	1.8804	3.5506	1.78409	7.24744	4.09945	5.36127	10.047	4.07935	10.6936

## Sheet: Table S7
Table S7. Expression dynamics of EgMDHs during adventitious root development
Gene ID	stembase_rootinduce_0h_rep1.1	stembase_rootinduce_0h_rep2.1	stembase_rootinduce_0h_rep3.1	stembase_rootinduce_1h_rep1.1	stembase_rootinduce_1h_rep2.1	stembase_rootinduce_1h_rep3.1	stembase_rootinduce_6h_rep1.1	stembase_rootinduce_6h_rep2.1	stembase_rootinduce_6h_rep3.1	stembase_rootinduce_24h_rep1.1	stembase_rootinduce_24h_rep2.1	stembase_rootinduce_24h_rep3.1	stembase_rootinduce_48h_rep1.1	stembase_rootinduce_48h_rep2.1	stembase_rootinduce_48h_rep3.1	stembase_rootinduce_72h_rep1.1	stembase_rootinduce_72h_rep2.1	stembase_rootinduce_72h_rep3.1	stembase_rootinduce_96h_rep1.1	stembase_rootinduce_96h_rep2.1	stembase_rootinduce_96h_rep3.1	root_adventitiousroot_induce_168h_rep1.1	root_adventitiousroot_induce_168h_rep2.1	root_adventitiousroot_induce_168h_rep3.1	root_adventitiousroot_induce_20d_rep1.1	root_adventitiousroot_induce_20d_rep2.1	root_adventitiousroot_induce_20d_rep3.1
EgMDH1	4019.17	13668.7	7551.93	5070.56	9895.21	6816.89	7031.75	17993.3	10967.9	10689.6	11510.3	11029.9	10862.2	10071.1	10202	8840.46	21541.8	14042.3	7365.54	7612.29	7415.04	33188.1	34415.5	33561.1	31837.1	29866.9	30517.7
EgMDH2	13356.5	14047	12852.2	8731.38	8101.99	8305.48	2184.98	1537.89	1922.09	8924.46	8679.78	8727.17	7455.81	7637.25	7369.06	7451.94	5806.26	6596.36	3340.37	3727.61	3541.76	1949.49	1503.29	1712.02	3751.69	3631.77	3635.87
EgMDH3	1282.77	2603.49	1729.09	1260.21	1572.88	1349.59	1660.65	2005.6	1681.44	3258.2	3197.57	3265.82	3885.58	3552.23	3595.3	3261.24	4630.63	3791.06	2994.55	3019.86	3039.44	7355.97	7868.18	7521.93	6419.96	5436.72	5917.35
EgMDH4	10944.7	18356.8	13190.5	11570.7	15325.3	12882.9	11441	15596.1	12801.6	18414.3	18201.8	18286.3	19335.8	18680.9	18195.3	18221.9	27432.1	21817.6	19505.1	18193	18713.4	51598	51183.9	51588.7	48941.4	37470.5	42722.7
EgMDH5	4356.36	6874.19	5123.61	3984.2	5707.5	4601.51	2741.26	3162.97	2755.1	4515.31	4239.88	4316.62	4951.21	4812.49	4715.34	5816.86	7085.85	6372.62	4821.84	4981.36	4910.79	6458.32	6931.16	6629.23	5507.47	6519.39	5948.42
EgMDH6	1433.74	2399.48	1689.18	1559.27	2411.75	1829	2794.51	4751.6	3466.75	4915.53	5545.51	5316.93	5248.43	4619.39	4804.98	3917.38	6832.59	5101.89	3636.66	3570.54	3625.78	14803.3	15210.8	14830.4	13707.2	8849.62	11003.4
EgMDH7	3.61598	2.70212	4.75024	3.60317	3.98198	3.28366	6.55412	0	6.17043	24.4344	31.1958	36.3263	15.2233	14.975	14.8023	17.8431	24.331	26.3855	21.3469	11.2193	16.4393	18.2729	21.7278	17.347	96.0522	11.673	42.7292
EgMDH8	37.0638	55.3934	41.8021	59.4523	160.606	89.7535	31.1321	125.251	63.7611	29.4898	21.103	23.0362	33.3464	46.5013	46.8738	64.8841	68.5692	88.6551	96.4881	49.5519	63.0173	137.046	129.009	130.77	155.379	119.649	143.726
EgMDH9	387.814	882.242	564.328	349.507	573.404	476.131	842.205	941.758	887.513	773.475	761.545	767.282	470.474	411.419	430.088	378.761	580.626	439.054	583.198	469.34	514.185	597.294	616.526	600.474	553.713	554.469	571.018
EgMDH10	15.3679	32.4254	21.8511	103.591	13.2733	72.2406	110.601	307.577	174.829	117.959	159.649	142.647	76.1167	81.1803	95.3923	47.041	89.5823	61.2143	106.735	67.3157	66.6705	165.598	264.807	214.836	131.366	332.682	240.837
EgMDH11	514.374	1865.81	1001.35	1027.8	2387.86	1588.2	1127.31	4566.1	2368.42	832.455	878.988	852.339	845.983	769.242	727.777	713.725	2204.17	1355.16	841.069	780.675	777.214	5530.97	7043.88	6271.61	5603.52	5935.74	5655.79
EgMDH12	0.903996	0	0	0	2.65465	0	4.91559	0	3.08521	21.0641	23.8556	28.3522	6.52429	2.36447	4.93408	7.29946	2.21191	8.44335	7.68489	3.73976	7.30636	3.42616	20.3698	13.3439	8.4752	13.1322	15.5379
EgMDH13	4.51998	0	1.90009	0.900792	0	1.09455	1.63853	0	1.0284	1.68513	1.83505	1.77201	2.17476	0.788158	0.822347	0	1.10595	0	2.56163	0	2.73988	1.14205	0	1.33439	0	2.91826	2.58965
EgMDH14	0	0	0	0.900792	1.32733	0	2.4578	3.1709	1.0284	0	0.917524	0	1.44984	2.36447	2.46704	2.43315	0	2.11084	5.12326	3.73976	3.65318	2.28411	14.9379	4.00316	0	0	0

## Sheet: Table S8
Table S8. Transcriptional responses of EgMDHs to SA/JA treatment
Gene ID	leaf_SA_1h_rep1.1	leaf_SA_1h_rep2.1	leaf_SA_1h_rep3.1	leaf_SA_6h_rep1.1	leaf_SA_6h_rep2.1	leaf_SA_6h_rep3.1	leaf_SA_168h_rep2.1	leaf_SA_168h_rep3.1	leaf_mock_rep1.1	leaf_mock_rep2.1	leaf_mock_rep3.1	leaf_JA_1h_rep1.1	leaf_JA_1h_rep2.1	leaf_JA_1h_rep3.1	leaf_JA_6h_rep1.1	leaf_JA_6h_rep2.1	leaf_JA_6h_rep3.1	leaf_JA_24h_rep1.1	leaf_JA_24h_rep2.1	leaf_JA_24h_rep3.1	leaf_JA_168h_rep1.1	leaf_JA_168h_rep2.1	leaf_JA_168h_rep3.1	leaf_mock_rep1.1	leaf_mock_rep2.1	leaf_mock_rep3.1
EgMDH1	9272.52	9686.89	9459.53	9877.75	8948.77	9631.8	10341.9	11055.2	6886	7695	8628	9198.34	8821.09	8787.71	10839.3	8928.16	9924.09	9104.65	11449.8	10061.5	5952.42	6662.62	6203.04	6886	7695	8628
EgMDH2	5529.86	4161.23	4789.87	7085	5767.35	6499.82	6685.24	6400.62	27654	28671	32909	7255.64	4978.78	6077.08	9254.92	5501.91	7149.39	6926.68	7342.2	7060.32	4916.27	4869.17	4917.27	27654	28671	32909
EgMDH3	4130	4233.26	4117.53	4319.66	4061.49	4246.89	6642.93	6361.21	2331	2367	2764	4501.75	4704.03	4569.34	5665.97	5095.31	5253.38	4505.48	4864.3	4719.54	2439.93	2259.18	2356.36	2331	2367	2764
EgMDH4	18948	17543.7	17974	18705.4	17755.3	18301.9	19010.1	19220.6	14173	15537	17272	16030.6	16179.6	16071	16381.6	15407.2	15897.7	14846.8	17439.8	16008.1	17681.3	20475.9	18433.1	14173	15537	17272
EgMDH5	64077.9	69541.9	66232.3	76478.4	74294.9	75445.8	43622.5	49179.3	22930	25859	28421	28025.9	24101.6	25667.8	21033.6	24677.5	23044	27349.3	26406.4	26406.4	30727.9	29247.6	29872.9	22930	25859	28421
EgMDH6	3299.23	3806.18	3538.7	2983.47	3476.25	3139.27	3706.34	3652.54	1974	2202	2547	3684.96	3996.34	3910.23	4109.27	4064.11	4094.3	4091.6	5185.29	4715.74	3309.26	4666.75	3866.61	1974	2202	2547
EgMDH7	101.77	87.2419	92.3912	115.62	203.881	134.957	66.7222	125.723	20	48	47	76.809	67.9933	88.9811	67.1728	62.554	68.7942	81.9065	89.9964	75.3455	79.4708	61.7545	77.704	20	48	47
EgMDH8	72.693	103.473	89.0518	96.5486	73.3386	92.403	67.5359	71.3056	119	108	130	88.0493	69.381	77.4465	69.3052	138.377	105.276	88.1115	62.2475	69.014	37.6121	22.3002	32.5427	119	108	130
EgMDH9	2475.72	2801.88	2576.94	3417.34	3460.11	3377.57	3048.07	3308.2	1503	1686	1894	2487.86	1846.92	2096	2573.89	1476.65	1973.14	2294	2789.89	2414.22	2083.83	1756.57	1961.86	1503	1686	1894
EgMDH10	23.8849	48.6931	28.9418	40.5266	33.7358	38.9065	48.8212	71.3056	86	15	55	93.6695	72.1562	100.516	30.9208	60.6584	53.1592	69.4964	92.9962	75.9787	197.767	368.811	270.968	86	15	55
EgMDH11	176.54	273.899	210.385	237.2	145.21	205.475	204.235	214.855	554	404	560	116.15	192.879	133.472	211.114	209.461	216.806	207.248	138.744	179.816	251.759	268.46	243.074	554	404	560
EgMDH12	14.5386	26.3755	17.8104	41.7185	39.6028	47.4173	15.46	30.0234	7	6	5	20.6073	26.3648	28.0126	15.9935	36.0159	11.4657	13.6511	26.2489	23.4268	27.9058	16.2963	25.9013	7	6	5
EgMDH13	1.03847	0	1.11315	3.57587	7.33386	1.21583	1.62737	2.81469	0	0	0	0	1.38762	1.6478	0	0	0	0	4.49982	1.89947	1.21329	6.00391	1.99241	0	0	0
EgMDH14	4.15389	4.05776	6.67889	9.53566	1.46677	2.43166	2.44106	1.87646	6	12	9	3.74678	6.9381	4.94339	6.39741	6.63451	8.33869	3.72302	2.99988	3.79893	6.67312	2.5731	5.97723	6	12	9

## Sheet: Table S9
Table S9. Expression patterns of EgMDHs under 200 mM NaCl treatment
Gene ID	leaf_NaCl_1h_rep2.1	leaf_NaCl_1h_rep3.1	leaf_NaCl_6h_rep1.1	leaf_NaCl_6h_rep2.1	leaf_NaCl_6h_rep3.1	leaf_NaCl_24h_rep1.1	leaf_NaCl_24h_rep3.1	leaf_NaCl_168h_rep1.1	leaf_NaCl_168h_rep2.1	leaf_NaCl_168h_rep3.1	mock_rep1.1	mock_rep2.1	mock_rep3.1
EgMDH1	6391.87	6184.71	9977.45	12283.3	11022.5	14627.8	13030.9	12645.8	11879	12226.8	5996.41	6910	6521.68
EgMDH2	7640.97	6736.5	1979.06	1224.4	1461.73	2760.58	3050.44	3782.75	5317.63	4412.74	3727.95	3684.01	3647.29
EgMDH3	2380.89	2702.46	4417.31	3927.72	4071.26	4477.36	4231.66	2482.4	2693.36	2531.87	2771.6	3405.77	3075.13
EgMDH4	16557.9	17256.2	16808.1	16666.8	16798	17813.8	18033.4	15595.8	16707.7	16180.1	11848.6	12780.2	12015.4
EgMDH5	28460.1	28301.2	14221.6	8648.07	10865.6	12491.8	13561	9604.52	11511.3	10520.2	49025.1	49062	48407.8
EgMDH6	2797.63	3121.3	4995.33	6881.74	5992.67	6573.8	5982.44	6789.58	6342.31	6512.05	2419.01	2542.13	2474.84
EgMDH7	73.7394	68.6158	33.7423	29.1223	32.2337	33.8052	30.4203	25.15	54.7537	38.7366	90.3265	48.7828	78.5511
EgMDH8	17.8762	34.3079	2.93411	5.06476	8.4088	12.4819	22.6534	19.5611	45.6281	34.4325	109.343	94.8555	96.0068
EgMDH9	539.639	676.152	991.73	1009.15	968.413	1865.52	1652.4	1260.3	1078.13	1211.59	2285.89	2063.33	2135.43
EgMDH10	344.117	298.05	529.607	464.691	545.17	213.753	188.994	345.58	378.061	362.618	11.0927	17.1643	20.3651
EgMDH11	1154.13	715.463	1186.85	1205.41	1174.43	603.812	627.823	783.377	1125.06	954.427	140.244	159.899	163.89
EgMDH12	30.1661	17.154	5.86822	7.59713	8.4088	16.1225	13.592	11.1778	10.4293	11.8362	17.4314	7.22709	14.5465
EgMDH13	5.58632	3.57374	4.40117	3.79857	2.80293	3.64056	5.17792	6.52038	9.12562	7.53211	1.58468	2.71016	1.93953
EgMDH14	7.82085	5.71798	8.80234	6.33095	7.00733	6.24095	5.17792	7.45186	19.5549	8.60813	4.75403	0.903386	1.93953

## Sheet: Table S10
Table S10. Comprehensive list of RT-qPCR primers utilized in this study
Name	Primer sequence (5'-3')
q_EgMDH1_F	TTTCTATGCTGGGAAGGCTAAAGTC
q_EgMDH1_R	TCCATCTTGTGTACGCTTGGTAAG
q_EgMDH2_F	ACCGAAGTTCCGAAGAGTAATAAGC
q_EgMDH2_R	AATCATTCCAGCAGCACCAGATAC
q_EgMDH3_F	CCAGAGGATGTTATCAAGGCACTTAC
q_EgMDH3_R	CCATTGAGTCCTTCTAAGCAAGCAT
q_EgMDH4_F	CTTGTGACCACATCCGTGACTG
q_EgMDH4_R	GCTGTCGCATCCATCTTCTTCC
q_EgMDH5_F	GCTCGTCTCTGTTCTTCATCTGT
q_EgMDH5_R	ATGACAAGGTCCATTCCTACAAGG
q_EgMDH6_F	GGAGATGGAGATGTCTACGAGTGT
q_EgMDH6_R	GTCAGAGGAGATCAGTGCTTCAAC
q_EgMDH7_F	TCGTCTCTGTTCTTCGTCTGTATG
q_EgMDH7_R	GATGATGACAAGGTCCATTCCAAC
q_EgMDH8_F	GAAGGCACGGAGAGGAAGGATT
q_EgMDH8_R	CAGGATTGGCAACCACTAGAACC
q_EgMDH9_F	GTTGTAGTCATACCTGCTGGAGTT
q_EgMDH9_R	GGTTGCTGATTATGTGGATGAAGG
q_EgMDH10_F	GTTCTTGCTGGCGGATCATCTT
q_EgMDH10_R	CACGGTCTTGTGGATGTTCTCC
q_EgMDH11_F	GTTCCTGATTGCCGATCACCTC
q_EgMDH11_R	ATCTTCTCCAGGGTCTCCTTCTC
q_EgMDH12_F	CAATGCGTGCCTGTGTATGTTG
q_EgMDH12_R	CCTGCTCCTTCGTACTCATTCAAT
q_EgMDH13_F	AATTGTTGAAGGTCATGCAGAAGTG
q_EgMDH13_R	TTGGATGCGTGATGTCAGGTAAT
q_EgMDH14_F	GAGAATCTCCGCTCACCTTCAC
q_EgMDH14_R	ATCTTCATCAACATCGCCAGAGG
q_EgACT7_F	GAAGGATGCCTATGTTGGTGATGAAG
q_EgACT7_R	CATTGTAGAAGGTGTGATGCCAGAT

[truncated: 1 more sheets: Table S11]
